# Supplementary material
Source: PubMed Central journal article supplement (PMC3623669)

|                                                                                      | <b>Page</b> |
|--------------------------------------------------------------------------------------|-------------|
| <b>Supplementary Note</b>                                                            | 3           |
| - Results of genome-wide association and replication testing                         | 3           |
| - Genome-wide significance and correction for multiple phenotypes                    | 3           |
| - Replication of previously published findings                                       | 4           |
| - Simulations of RNAi silencing in <i>D. melanogaster</i>                            | 4           |
| - Thalassaemia studies                                                               | 5           |
| - GWAS cohort methods                                                                | 5           |
| - Replication and population variation cohort methods                                | 11          |
| - Acknowledgements                                                                   | 13          |
| <br>                                                                                 |             |
| <b>Supplementary Tables</b>                                                          |             |
| 1. Characteristics of participants in the genome-wide and replication cohorts        | 20          |
| 2. Summary of study genotyping methods in the genome-wide association cohorts        | 22          |
| 3. Genomic control inflation factors                                                 | 24          |
| 4. Association test results for all SNPs reaching $P < 10^{-6}$ in the GWAS          | online      |
| 5. Genome-wide association and replication test results for the 75 sentinel SNPs     | online      |
| 6. SNPs previously reported to be associated with red blood cell phenotypes          | 27          |
| 7. Comprehensive list of locus-phenotype associations identified                     | 30          |
| 8. Potential secondary SNPs with independent effects on phenotype                    | 34          |
| 9. Coding SNPs in LD with sentinel SNPs                                              | 35          |
| 10. Relationship between sentinel SNPs and cis eQTLs                                 | 37          |
| 11. Candidate genes identified by GRAIL                                              | 38          |
| 12. Pathways analysis of candidate genes                                             | 40          |
| 13. Top biological functions of candidate genes                                      | 41          |
| 14. Summary of known biology for the 121 candidate genes                             | 42          |
| 15. Cell types in the Differentiation Map of Haematology                             | 52          |
| 16. Nucleosome deplete regions identified by FAIRE-seq                               | 53          |
| 17. Impact of NDR calling stringency on number and tissue distribution of NDRs       | 56          |
| 18. Genes closest to an erythroblast NDR containing a sentinel SNP or SNP in high LD | 57          |
| 19. Bioinformatic approaches used for identification of candidate genes              | 58          |
| 20. Results of RNAi silencing in <i>D. melanogaster</i>                              | 61          |
| 21. Phenotypic variance explained by sentinel SNPs                                   | 62          |
| 22. Effects of sentinel SNPs in $\beta$ -thalassaemia heterozygotes and controls     | 63          |
| 23. Effect sizes in South Asians at the novel loci identified                        | 66          |
| 24. Pearson correlation coefficients between phenotypic traits and SNP associations  | 69          |
| 25. Permutation testing to determine the effective number phenotypes                 | 70          |
| 26. Replication testing of sentinel SNPs                                             | 71          |
| 27. Results of the <i>Drosophila</i> RNAi screen                                     | 73          |
| <br>                                                                                 |             |
| <b>Supplementary references</b>                                                      | 77          |

|                                                                                  | <b>Page</b> |
|----------------------------------------------------------------------------------|-------------|
| <b>Supplementary Figures</b>                                                     |             |
| 1. Study design                                                                  | 87          |
| 2. Manhattan plots for the six red blood cell phenotypes                         | 88          |
| 3. Regional plots for the 75 genetic loci identified                             | 94          |
| 4. Regional plots for the 3 East Asian loci not replicating in Europeans         | 108         |
| 5. Associations of the sentinel SNPs with red blood cell phenotypes              | 109         |
| 6. Candidate genes at the loci associated with haemoglobin, MCV or RBC           | 110         |
| 7. Distance between HapMap2 SNPs (discovery GWAS) and 1000G SNPs in LD           | 111         |
| 8. Permutation testing to simulate the null hypothesis in the Drosophila studies | 112         |

## Supplementary Note

### Results of genome-wide association and replication testing

Genome-wide association was done amongst 62,553 people of European ancestry and 9,308 people of South Asian ancestry from 30 separate studies, using 2,644,161 autosomal and 67,645 X chromosome SNPs (**Supplementary Tables 1-2**). Data for Europeans and South Asians were analysed separately, followed by combined analysis of results for the two populations. Genomic control inflation factors are shown in **Supplementary Table 3**.

There were 2,484 SNPs associated with one or more red blood cell phenotype at  $P < 10^{-8}$  amongst Europeans (**Figure 1**), these were distributed between 63 genomic loci. We found a further 17 loci with SNPs showing suggestive evidence of association to red blood cell phenotypes ( $P > 10^{-8}$  and  $P < 10^{-7}$ ); at these loci we identified the SNP with the lowest P value against any trait and carried out additional replication testing using a combination of in-silico data and direct genotyping amongst 63,506 people of European ancestry (**Supplementary Table 1**). At 8 of the 17 loci the lead SNP showed replication ( $P < 0.05$  after Bonferroni correction for multiple testing, and  $P < 1 \times 10^{-8}$  in combined analysis with their discovery GWA data). Taken together the genome-wide and replication data from Europeans identified 71 loci associated with red blood cell phenotypes at  $P < 10^{-8}$  (**Table 1**).

In the genome-wide association study of 9,308 people of South Asian ancestry, we found 43 SNPs associated with red blood cell phenotypes at  $P < 10^{-7}$ , these were located at 6 genomic loci already identified in the Europeans. We found evidence for shared genetic effects between Europeans and South Asians at both known and novel loci. At the 59 loci associated with red blood cell phenotypes in Europeans that were successfully genotyped or imputed in South Asians, 49 showed directional consistency and 20 showed nominal replication in South Asians, with little evidence for heterogeneity of effect between the two population groups.

We therefore carried out a final meta-analysis of genome-wide association results from the two populations and identified five genomic loci associated with RBC traits at  $P < 10^{-7}$ , that had not been found in the separate European or South Asian specific analyses (**Table 1**). Four of these additional five loci all replicated in further testing ( $P < 0.05$  in replication samples, and  $P < 10^{-8}$  in combined analysis with GWA data).

### Genome-wide significance and correction for multiple phenotypes

Our choice of statistical threshold was grounded on the guidelines derived from studies of the ENCODE regions which suggest that  $P < 5 \times 10^{-8}$  is the appropriate threshold for genome-wide significance in Europeans, but was designed to provide us additional adjustment for the multiple phenotypes tested. The six red blood cell parameters studied are inter-related: correlation coefficients between the phenotype pairs range from  $r = 0.07$  to  $0.96$ , and between their respective genome-wide association test results from  $r = 0.14$  to  $0.79$  (**Supplementary Table 23**). Based on this correlation matrix, a simple Bonferroni correction for six phenotypes is overly conservative.

To control for the multiple testing of the 6 phenotypes while accounting for the correlation between them, we first performed an eigenvalue decomposition of the correlation matrix (**Supplementary Table 23**) of the phenotypes and used the variance of the eigenvalues to estimate the effective number of independent phenotypes tested;<sup>1</sup> this indicated that the phenotypes correspond to approximately 4.7 independent phenotypes. We then used permutation testing to provide a further estimate of the appropriate correction for multiple phenotypes. The genome-wide association study for association of SNPs with red blood cell traits was run 100 times in the LOLIPOP study EW610 and IA160 samples, with randomisation of genotype and phenotype data to simulate expectations under the null hypothesis. The minimum P value ( $P_{\min}$ ) for association with any phenotype was determined for each SNP, and after 100 runs, the number of SNPs with  $P_{\min}$  reaching suggestive statistical significance determined ( $P < 10^{-6}$ ,  $P < 10^{-7}$  or  $P < 5 \times 10^{-8}$ ). In the first 100 runs, the phenotype data was left intact to assess the number of associations expected under the null hypothesis for 6 related phenotypes ("Related"). In the second 100 runs, the phenotype data for the six red blood cell

traits were also randomised to assess the number of associations expected under the null hypothesis for 6 unrelated phenotypes (“Unrelated”). Results of permutation testing show that when phenotype correlations between the red blood cell traits are preserved, the number of SNPs reaching high levels of statistical significance is  $\sim 5/6$  the number found when using randomised, unrelated phenotype data (**Supplementary Table 24**). This was true amongst both Europeans and South Asians. Our findings indicate that studying 6 related red blood cell traits is equivalent to analysis of 5 independent phenotypes. Based on these observations we therefore adopt  $P < 1.0 \times 10^{-8}$  to indicate genome-wide significance, to provide correction for the effective number of independent phenotypes studied.

#### Replication of previously published findings.

Of the 38 loci previously reported to be associated with red blood cell traits,<sup>2-6</sup> we replicate 32 loci at  $P < 10^{-8}$ , and a further 3 at  $P < 0.05$  (**Supplementary Table 6**). There are three loci reported to be associated with red blood cell phenotypes that did not replicate in our sample; all three were discovered in an East Asian GWAS<sup>5</sup>. The 3 SNPs have similar allele frequency amongst Europeans and East Asians suggesting that our findings do not result from loss of power. SNP rs7843479 is in moderate LD ( $r^2 = 0.25$  [CEU], 0.72 [CHB/JPT]) with rs10503716 that is associated with MCV in the present study ( $P = 5.0 \times 10^{-7}$ ) consistent with a causal variant that is in LD with both these SNPs. For two variants (rs6684514 and rs12127588), there are no SNPs nearby closely associated with respective phenotype in Europeans (**Supplementary Figure 4**), suggesting either population specific genetic variants, or gene-environment interactions.

#### Simulations of RNAi silencing in *D. melanogaster*

To inform selection of a threshold for reporting an RNAi silencer model as affected, and to assess the statistical significance of our findings, we carried out permutation testing in a genome-wide phenotypic screen of 5,658 *D. melanogaster* genes carried using RNAi silencing (UE, JMP unpublished data). The genome-wide screen was carried out using the methodology described in the present study and in the same laboratory, with the exception that each line was scored once rather than twice.

We selected random sets of 121 human genes, identified their *D. melanogaster* orthologs, and counted the number of orthologs with a blood cell phenotype in the RNAi screen. This was repeated 1,000,000 times for each of the three possible calling-thresholds (1 to 3), to build up an expectation under the null hypothesis (**Supplementary Figure 7**). Next we determined which of the 121 candidate genes identified in the red blood cell GWAs had a blood cell phenotype in the genome-wide RNAi screen at each of the three calling thresholds. We found the 121 candidate genes to be enriched 2-3 fold for haematological phenotypes in the RNAi screen compared to mean observed in simulations of the null hypothesis, and that this enrichment was robust to the precise choice of threshold ( $P < 0.05$ , **Supplementary Figure 7**).

Based on this evidence for enrichment we extended our analysis by creating RNAi silencer models for all *D. melanogaster* genes orthologous to the 121 candidate genes identified in the GWAS; specifically this allowed us i. to evaluate 24 candidate genes not studied in the genome-wide screen, and ii. to carry out measurements in duplicate, thereby improving the accuracy of results. We selected a phenotype score of  $\geq 2$  to define abnormal blood cell phenotype in the RNAi models which revealed blood cell phenotypes for 19 of the candidate genes. This threshold was chosen to provide a balance of sensitivity and specificity. We additionally provide ortholog specific results (**Supplementary Table 26**) to enable our findings to be reassessed using more or less stringent approaches to calling.

We studied RNAi silencer models for 74 of the human candidate genes; 19 of these show a blood cell phenotype in *Drosophila* (*Drosophila* positive), 55 do not (*Drosophila* negative). *Drosophila* positive genes are  $\sim 50\%$  more likely than *Drosophila* negative genes to have a phenotype in mammalian systems (5/19 vs 10/55,  $P = 0.44$ ). Our results are consistent with the view that the *Drosophila* positive genes are enriched for genes involved in blood cell formation.



### Thalassaemia studies

We investigated whether genetic variation at the 75 loci identified might impact beta-thalassaemia phenotype, a genetic disorder characterised by defects in haemoglobin synthesis, anaemia and abnormal red blood cell indices, in both heterozygous carriers and affected individuals. Clinical severity of beta-thalassaemia is variable, ranging from severe transfusion dependent thalassaemia major to the mild thalassaemia intermedia, and is in part influenced by genetic modifiers.<sup>7,8</sup>

First, we tested the association of each sentinel SNP with its respective discovery phenotype amongst 460 carriers for  $\beta$ -thalassaemia mutation, and 3,876 controls (without known  $\beta$ -thalassaemia mutations). We confirmed association of several of the sentinel SNPs with respective phenotype (**Supplementary Table 21**). There was little evidence for heterogeneity, although the association of rs17616316 (*EIF5*) with MCH was  $\sim 10$ -fold stronger amongst the beta-thalassaemia heterozygotes than amongst controls (heterogeneity  $P=5.3 \times 10^{-4}$ , **Supplementary Table 21**). We then analysed 495  $\beta$ -thalassaemia patients (375  $\beta 0/\beta 0$ , 80  $\beta 0/\beta +$  and 40  $\beta +/\beta +$ ) from the general Italian population, to assess the contribution of associated loci in anticipating the age of first transfusion. Evidence for association ( $P=0.01$ ) was detected at SNP rs9386796, within the *CCDC162P* gene, where the allele associated with increased MCH levels anticipates the age at first transfusion, indicator of greater clinical severity. The functional role of this locus is at present unclear and requires additional replication in independent  $\beta$ -thalassaemia cohorts. We also found that the weighted genetic risk score predicted time to first transfusion ( $P=6.9 \times 10^{-4}$ ). However this was determined entirely by genetic variation at the *MYB-HBS1L* locus,<sup>9</sup> and variation at the other 74 loci did not independently predict time to transfusion ( $P=0.17$ ).

### GWAS cohort methods

**ALSPAC: Avon Longitudinal Study of Parents and Children.** ALSPAC is a population-based birth cohort study consisting initially of over 13,000 women and their children recruited in the county of Avon, UK in the early 1990s<sup>10</sup>. Both mothers and children have been extensively followed from the 8th gestational week onwards using a combination of self-reported questionnaires, medical records and physical examinations. Biological samples including DNA have been collected for 10121 of the children from this cohort. Ethical approval was obtained from the ALSPAC Law and Ethics committee and relevant local ethics committees, and written informed consent provided by all parents. Haemoglobin levels were measured using the Haemocue system using blood collected from a 7.5ml EDTA tube.

**Amish.** The Old Order Amish individuals included in this study were participants of several ongoing studies of cardiovascular health carried out at the University of Maryland. Participants were relatively healthy volunteers from the Old Order Amish community of Lancaster County, Pennsylvania and their family members<sup>11, 12</sup>. Examinations were conducted at the Amish Research Clinic in Strasburg, PA. The Institutional Review Board at the University of Maryland approved all protocols and informed consent was obtained, including permission to use their DNA for genetic studies. Study participants were enrolled within the 2000-2008 time period. Of the total phenotyped participants, a total of 1578 had CBC measures (Quest Diagnostics, Horsham, PA) and genotype information (Affymetrix 500K or 6.0). The clinical protocol used for blood collection and processing has been described in detail previously<sup>11</sup>. Briefly, venous blood samples from all participants were collected for haematological assessment and DNA genotyping. CBC processing was completed within 24h after venesection. Association analysis was performed using Mixed models Analysis for Pedigrees and Populations (MMAP) software developed by J.R. O'Connell (<http://edn.som.umaryland.edu/mmap/index.php>)

**CoLaus: Cohorte Lausannoise.** The design of the CoLaus study has been described previously<sup>13</sup>. Briefly, it is a population-based study conducted between 2003 and 2006, which

recruited over 6,000 subjects in Lausanne, Switzerland. The following inclusion criteria were applied: a) voluntary participation in the examination, including blood sample, b) aged 35-75 years, and c) Caucasian origin defined as having both parents and grand-parents Caucasian (determined by birth place). The Institutional Review Board of the Centre Hospitalier Universitaire Vaudois (CHUV) in Lausanne and the Cantonal Ethics Committee approved the study protocol and signed informed consent was obtained from participants. Starting in 2009 all participants were invited for a follow-up visit 5 years after the initial study (expected completion of the study 2012). This follow-up study was approved by the local ethics committee. During the follow-up visit, similar variables as in the cross-sectional study are measured with in addition a hemogram. The latter was measured on a haematology Sysmex XE2100 analyser (TOA Medical Electronics, Kobe, Japan) according to the manufacturer's indications.

**DESIR.** DESIR is a French cohort from the general-population: 716 individuals were genotyped, 178 men and 538 women<sup>14</sup>. Written informed consent was obtained from every participant to the study. Blood was anticoagulated with EDTA. Blood count measurements were performed using either a Technicon H3RTX (Bayer Diagnostics), Puteaux, France or a JT2 analyser (Beckman/Coulter), Roissy, France or an Argos from ABX, Montpellier, France.

**EGCUT: Estonian Genome Center of University of Tartu.** The EGCUT cohort is from the population-based biobank of the Estonian Genome Project of University of Tartu<sup>15</sup>. The project was conducted according to the Estonian Gene Research Act and all participants signed the broad informed consent<sup>15</sup>. The current cohort size is over 50,000, from 18 years of age and up, which reflects closely the age distribution in the adult Estonian population. Participants were randomly selected from individuals visiting GP offices or hospitals and were recruited by general practitioners (GP) and physicians. Each participant filled out a Computer Assisted Personal interview, which included personal data (place of birth, place(s) of living, nationality etc.), genealogical data (family history, three generations), educational and occupational history and lifestyle data (physical activity, dietary habits, smoking, alcohol consumption, women's health, quality of life). Venous blood was anticoagulated with EDTA and FBCs were performed using XE2100 automated haematology analyser (Sysmex, Kobe, Japan).

**EPIC.** The EPIC Obesity study used a case-cohort design which included 1284 participant whose body mass index was above 30 and a random sample of 2566 from the EPIC-Norfolk Study, a population-based cohort study of 25663 men and women of European descent aged 39-79 years recruited in Norfolk, between 1993 and 1997<sup>16</sup>. Blood sample was taken during the day in the GPs' surgeries or EPIC clinic, were held overnight. Early the following morning, samples were collected from GP surgeries by technicians. Some assays were performed on fresh blood samples and the remaining blood was stored in straws. A 1 x 2ml EDTA sample provided blood for full blood count. Two x 10 ml citrated samples provided twelve straws of plasma, four straws of red blood cells plus preservation buffer and four straws of buffy coat and saline. A Coulter MD18 haematology analyser was used for the measurement of full blood counts. Quality controls were carried out on the Coulter scheme daily. In addition, the Haematology Department of Addenbrooke's Hospital included the EPIC Laboratory in a monthly quality control scheme.

**GeneBank.** GeneBank is a single site (Cleveland Clinic), hospital-based registry and connecting sample repository comprised of approximately 10,000 sequential consenting subjects undergoing elective cardiac evaluation through either coronary angiography or cardiac computed tomography. The GeneBank cohort has been used previously for discovery and replication of novel genes and risk factors for atherosclerotic CVD<sup>17</sup>. Subject recruitment into GeneBank occurred between 2001 and 2006 and provides an on-going focus for analysing the association of biochemical and genetic factors with coronary atherosclerosis in a consecutive cohort of patients undergoing elective cardiac evaluation. Enrolment criteria included stable patients undergoing elective coronary evaluation and the ability to give informed consent.

Extensive clinical, demographic, laboratory and angiographic data were collected from electronic medical records. Ethnicity information was self-reported. All patients provided written informed consent prior to being enrolled in GeneBank and the Institutional Review Board of the Cleveland Clinic approved the study. Fasting blood samples were collected prior to heparin administration for subjects undergoing elective diagnostic coronary angiography. Blood cell phenotypes were determined within 6 hr of blood draw using an ADVIA 2120 haematology analyser, which is a flow cytometry-based system that provides a complete blood cell count and a white blood cell differential.

**INGI CARL: The INGI Carlantino cohort study.** The Carlantino cohort includes approximately 1000 samples from an isolated village of Southern Italy (Carlantino) settled 5 centuries ago by few founders in a remote area<sup>18</sup>. Genealogical data are available since XVII<sup>o</sup> century. Participants have been deeply phenotyped (hundreds of quantitative and qualitative traits). After DNA extraction, genotyping data have obtained with High Density SNPs arrays from Illumina. Data have been imputed to HapMap map. Ethics approval was obtained from the Ethics Committee of the Burlo Garofolo children hospital in Trieste. Written informed consent was obtained from every participant to the study.

**INGI-Cilento.** The INGI-Cilento is a population-based study of isolated populations located in the area of the National Park of Cilento e Vallo di Diano<sup>19</sup>. A total of 2,137 individuals were available with FBCs. The study design was approved by the ethics committee of Azienda Sanitaria Locale Napoli 1. The study was conducted according to the criteria set by the declaration of Helsinki and each subject signed an informed consent before participating to the study. Blood was anticoagulated with EDTA and FBCs were performed using the automated particle counters Max M analyser (Coulter Electronics, Miami, USA) (on average within 24 hours from venesection).

**INGI FVG: The INGI Friuli Venezia Giulia cohort study.** The Friuli Venezia Giulia cohort is characterized by approximately 1700 samples from six isolated villages of Northern Italy (San Martino del Carso, Erto, Clauzetto, Sauris, Illegio, Resia)<sup>20</sup>. Isolation was in most cases due to a combination of a geographical barrier (mountains) plus a linguistic one. Participants have been deeply phenotyped (hundreds of quantitative and qualitative traits). After DNA extraction genotyping data have obtained with High Density SNPs arrays from Illumina (700K), and imputed using both HapMap and 1000 genome data. Ethics approval was obtained from the Ethics Committee of the Burlo Garofolo children hospital in Trieste. Written informed consent was obtained from every participant to the study.

**INGI Val Borbera. The INGI-Val Borbera** project was initiated in 2005 with the collection of phenotypic data from a geographically isolated population of North West Italy living in the Val Borbera Valley in Piedmont<sup>21</sup>. Inhabitants of the valley were invited to participate in the study by public advertisements through local authorities, televisions and newspapers as well as local physicians and mailings. Meetings were organized in all villages to present the project and its aims. The importance of the participation of entire families was underscored in all instances, nevertheless all people that volunteered to participate were included in the study, providing they had at least one grandparent from the valley. The study, including the overall plan and the informed consent form was reviewed and approved by the institutional review boards of San Raffaele Hospital in Milan and by the Regione Piemonte ethical committee. Information and biological samples were obtained from 1803 inhabitants between 18 and 102 years of age. 1664 DNAs were genotyped with the 370k Illumina chip. Only individuals aged 18 years or older were eligible. Venous blood measurements were done using either an SF3000 haematology analyser or a XE2100 haematology analyser (DASIT). The two instruments displayed no significant statistical differences in measurements range and association analyses were not adjusted for instruments type.

**KORA F3.** The study population for the KORA F3 GWAS was recruited from the KORA S3 survey (4,856 subjects, response 75%)<sup>22</sup>. It is an independent population-based sample from the general population living in the region of Augsburg, Southern Germany, examined in the years 1994/95 (KORA S3). The standardized examinations have been described in detail elsewhere<sup>15</sup>. A total of 3,006 subjects participated in a follow-up examination of S3 in 2004/05 (KORA F3). For KORA F3 we selected 1,643 subjects of these participants then aged 35 to 79 years. Informed consent has been given. The local ethical committee has approved the study. DNA was extracted from fresh blood, and was stored at -80°C. FBCs were performed on fresh venous EDTA-anticoagulated blood using an automatic blood counter (Beckman Coulter STKS).

**KORA F4.** The KORA S4 survey, an independent population-based sample from the general population living in the region of Augsburg, Southern Germany, was conducted in 1999/2001<sup>23</sup>. The standardized examinations applied in the survey (4,261 participants, response 67%) have been described in detail elsewhere. A total of 3,080 subjects participated in a follow-up examination of S4 in 2006/08 (KORA F4). For KORA 1000K we selected 1,814 subjects of these participants. Informed consent has been given. The local ethical committee has approved the study. The KORA S3 and S4 samples do not overlap. DNA was extracted from fresh blood, and was stored at -80°C. FBCs were performed on fresh venous EDTA-anticoagulated blood using an automatic blood counter (Beckman Coulter LH 750).

**LBC1921: Lothian Birth Cohort 1921.** The LBC1921 cohort consists of 550 relatively healthy individuals, 316 females and 234 males, assessed on cognitive and medical traits at 79 years of age<sup>24, 25</sup>. They were born in 1921, most took part in the Scottish Mental Survey of 1932, and almost all lived independently in the Lothian region (Edinburgh City and surrounding area) in Scotland. When tested, the sample had a mean age of 79.1 years (SD = 0.6). A full description of participant recruitment and testing can be found elsewhere<sup>25</sup>. Ethics permission for the study was obtained from the Lothian Research Ethics Committee (LREC/1998/4/183). The research was carried out in compliance with the Helsinki Declaration. All subjects gave written, informed consent. Venous blood was collected in 2.7ml Sarstedt tubes and anticoagulated with EDTA. Full blood counts were performed on the same day using a Coulter LH 750 Haematology Analyser (Beckman Coulter Inc, Milton, UK).

**LBC1936: Lothian Birth Cohort 1936.** The LBC1936 consists of 1,091 relatively healthy individuals assessed on cognitive and medical traits at 70 years of age<sup>26, 27</sup>. They were born in 1936, most took part in the Scottish Mental Survey of 1947, and almost all lived independently in the Lothian region of Scotland. The sample of 548 men and 543 women had a mean age 69.6 years (SD = 0.8). A full description of participant recruitment and testing can be found elsewhere<sup>26</sup>. Ethics permission for the study was obtained from the Multi-Centre Research Ethics Committee for Scotland (MREC/01/0/56). The research was carried out in compliance with the Helsinki Declaration. All subjects gave written, informed consent. Venous blood was collected in 2.7ml Sarstedt tubes and anticoagulated with EDTA. Full blood counts were performed on the same day using a Coulter LH 750 Haematology Analyser (Beckman Coulter Inc, Milton, UK).

**LifeLines.** The LifeLines Cohort Study is a multi-disciplinary prospective population-based cohort study examining in a unique three-generation design the health and health-related behaviours of 165,000 persons living in the North East region of The Netherlands<sup>28</sup>. It employs a broad range of investigative procedures in assessing the biomedical, socio-demographic, behavioural, physical and psychological factors which contribute to the health and disease of the general population, with a special focus on multimorbidity. In addition, the LifeLines project comprises a number of cross-sectional sub-studies, which investigate specific age-related conditions. These include investigations into metabolic and hormonal diseases, including obesity, cardiovascular and renal diseases, pulmonary diseases and allergy, cognitive function



and depression, and musculoskeletal conditions. Written informed consent was obtained from every participant. All participants are between 18 and 90 years old at the time of enrolment. Recruitment has been going on since the end of 2006, and until November 2011 over 62,000 participants have been included. Blood was drawn in BD tubes anticoagulated with EDTA. Blood count measurements were performed using a Sysmex XE2100.

**LOLIPOP: London Life Sciences Population study.** LOLIPOP is a population based cohort study of ~30,000 Indian Asian and European white men and women, aged 35-75 years, recruited from the lists of 58 General Practitioners in West London, UK<sup>29</sup>. Venous blood was anticoagulated with EDTA and transferred in 4 ml BD Vacutainer® Rapid Serum Tubes. Full blood counts were performed using a XE2100 automated haematology analyser.

**MDC: Malmo Diet and Cancer study.** A random sample of all men and women, born between 1923 and 1950 and living in Malmö, Sweden, were invited to participate in the Malmö Diet and Cancer Study, MDC<sup>30</sup>. Between March 1991 and September 1996, the respondents participated in several clinical examinations at the screening centre, and a self-administered questionnaire. The cohort consisted of 28,449 subjects (11,246 men and 17,203 women) from the eligible population of about 74,000 individuals. The regional ethics committee approved the MDC study. Participants provided informed consent. The cohort has been shown to be representative considering smoking and overweight, but with a higher mortality rate in non-participants.

A self-administered questionnaire was used to obtain information on smoking habits, diabetes, anti-hypertensive medication, marital status, education level and history of myocardial infarction. Smoking was divided into four different categories; smokers, former smokers, non-smokers and missing. Marital status was classified into two groups; unmarried (single, divorced, or widowed) or married (cohabiting). Educational level was divided into low ( $\leq 8$  years), moderate (9 to 12 years), and high (college/university) levels. Blood pressure was measured using a mercury-column sphygmomanometer after 10 minutes of rest in the supine position. Hypertension was defined as systolic BP  $\geq 140/90$  mm Hg or use of anti-hypertensive medication. Body weight, height, and waist circumference were measured. Diabetes mellitus was defined as self-reported diabetes according to the questionnaire, and/or treatment with anti-diabetic medication. Total and differential blood cell count were analysed using a SYSMEX K1000 automatic counter (Sysmex Europe, Norderstedt, Germany). The analyses were performed consecutively at the time of the screening examination, at the central laboratory of Malmö Hospital, using fresh heparinised blood. The subjects included in the GWAS study were selected from the lower 9% of the blood pressure distribution.<sup>31</sup>

**MICROS: Microisolates in South Tyrol.** The MICROS study is part of the genomic health care program 'GenNova' and was carried out in three villages of the Val Venosta, South Tyrol (Italy), in 2001-2003.<sup>32</sup> Briefly, study participants were volunteers from three isolated villages located in the Italian Alps, in a German-speaking region bordering with Austria and Switzerland. Owing to geographical, historical and political reasons, the entire region experienced a prolonged period of isolation from surrounding populations. Information on the participant's health status was collected through a standardized questionnaire. Laboratory data were obtained from standard blood analyses Blood count measurements.

**NESDA: Netherlands Study of Depression and Anxiety.** NESDA is a multi-centre study designed to examine the long-term course and consequences of depressive and anxiety disorders (<http://www.nesda.nl>).<sup>33</sup> NESDA included both individuals with depressive and/or anxiety disorders and controls without psychiatric conditions. Inclusion criteria were age 18-65 years and self-reported western European ancestry, exclusion criteria were not being fluent in Dutch and having a primary diagnosis of another psychiatric condition (psychotic disorder, obsessive compulsive disorder, bipolar disorder, or severe substance use disorder). Venous blood samples after overnight fast were obtained from participants at the baseline NESDA

sample, and transported to local laboratories in the three NESDA regions for analysis the same day. Red Blood Cell count was determined using the Cell-Dyn Sapphire (Abbott Diagnostics).

**NFBC1966: The North Finland Birth Cohort of 1966.** NFBC1966 was designed to study factors affecting preterm birth, low birth weight, and subsequent morbidity and mortality<sup>34</sup>. The longitudinal data collection includes clinical examination and blood sampling at age 31 years, from which data in the current study are drawn. The attendees in the follow-up (71% response rate) were adequately representative of the original cohort as is the final study sample in the present analyses. A total of 4,763 genotyped samples were available from the NFBC1966. Blood count measurements.

**NTR: Netherlands Twin Register.** Subjects were registered with the Netherlands Twin Register and took part in the NTR-Biobank project, which targeted an unselected group of Dutch families. Blood samples were taken at the respondents' home between 07.00 and 10.00 am. A haematology profile was obtained within 6h of blood collection using a Coulter instrument.<sup>35</sup> Participants gave informed consent and the study was approved by the Ethics Committee on Research Involving Human Subjects of the VU University Medical Centre, Amsterdam (IRB-2991 under Federalwide Assurance 3703; IRB/institute code NTR 03-180).

**PREVEND: Prevention of Renal and Vascular End stage Disease** study. This is an ongoing prospective study investigating the natural course of increased levels of urinary albumin excretion and its relation to renal and cardiovascular disease. Details of the protocol have been described elsewhere ([www.prevend.org](http://www.prevend.org)).<sup>36</sup> Blood samples were obtained in the morning hours. Red blood cell measurements were performed at the 2<sup>nd</sup> visit (~4.2 years from baseline). The drawn blood was anticoagulated with disodium-ethylenediamine tetra-acetic acid and tested with a Coulter Counter (Beckman-Coulter, Fullerton, CA). For 3121 subjects and Genome Wide Data were available for this study. Replication was performed in an additional 2939 subjects.

**QIMR.** FBC were obtained from 2,538 adolescent twins and their siblings from 1,089 Australian families ascertained from the general population. Twins were enlisted through primary schools, media appeals and by word of mouth and tested longitudinally as close as possible to their twelfth, fourteenth and sixteenth birthdays in the context of an on-going study of melanocytic naevi. Participants (and where appropriate their parents or guardians) gave informed consent to participation, and all studies were approved by appropriate ethics committees. The clinical protocol used for blood collection and processing has been described in detail previously<sup>37</sup>. Briefly, venous blood samples from the twins and, where possible, from their parents and siblings, were collected for haematological assessment (twins and sibs only) and DNA genotyping. FBC were obtained within 24h after venesection using a Coulter (Model STKS) instrument. For each trait, outlier observations (6 SD above the mean) at each time of assessment (ages 12, 14 and 16) were excluded from analysis and the average across all available time points was computed.

**SardiNIA.** We recruited and phenotyped 6,148 individuals, males and females, ages 14–102 yr, from a cluster of four towns in the Ogliastra province of Sardinia. Both, the IRB at NIA and the Italian ethical Committee approved the study protocol and all participants provided a written informed consent. During physical examination, a blood sample was collected from each individual, and divided into two aliquots; one was used for genomic DNA extraction and the second aliquot to characterize several blood phenotypes as previously described<sup>38</sup>. Among the recruited samples, about 13% was carrier of the beta039 mutation, according to estimates for the Sardinian population<sup>39</sup>.

**SHIP: The Study of Health in Pomerania.** SHIP is a longitudinal population-based cohort study conducted in West Pomerania, the north-east area of Germany<sup>40</sup>. Only individuals with



German citizenship and main residency in the study area were included. The baseline net sample comprised 6,265 eligible subjects, aged 20 to 79 years, out of which 4,308 participated at baseline (response 68.8%). In total 3300 persons took part in the follow-up examinations (83.5% of eligible persons), conducted between 2002 and 2006. Follow-up data from 3183 subjects was available for the present analyses. Non-fasting blood samples were taken in the supine position. The blood count was measured within 60 minutes. Samples were analysed with a Sysmex SE-9000 analyser (Sysmex, Hamburg, Germany). The analysers were calibrated and maintained according to the manufacturer's instructions. Quality control was performed internally daily as well as externally by participating in external proficiency testing programmes.

**Sorbs.** All subjects are part of a sample from an extensively phenotyped self-contained population from Eastern Germany, the Sorbs<sup>41</sup>. Sampling comprised unrelated subjects as well as families. Extensive phenotyping included standardised questionnaires for past medical history and family history, collection of anthropometric data and a 75g oral glucose tolerance test. The study was approved by the ethics committee of the University of Leipzig and all subjects gave written informed consent before taking part in the study. Venous EDTA blood samples were analysed by use of the haematology automated analyser Sysmex XE-2100.

**TwinsUK.** The TwinsUK cohort is an adult twin British registry shown to be representative of singleton populations and the United Kingdom population<sup>42</sup>. A total of 1,763 twins (100 % females) were available with FBCs. Ethics approval was obtained from the Guy's and St. Thomas' Hospital Ethics Committee. Written informed consent was obtained from every participant to the study. Venous blood was anticoagulated with EDTA and FBCs were performed using either an ADVIA 2120 Haematology System (Siemens Healthcare Diagnostics, Deerfield, IL, US) or a XE2100 automated haematology analyser (Sysmex, Kobe, Japan) (on average within 24 hours from venesection (range 20 - 30 hrs). The two instruments displayed differences in measurements range, with means (SD) of 9.69 (0.96) and 11.17 (1.03) respectively. Hence association analyses were adjusted for instrument type.

**UKBS-CC: UK Blood Services Common Controls.** The UKBS collection is a national control collection of shared controls for GWAS and was established as part of the Wellcome Trust Case Control Consortium. Full blood counts were measured on a Beckman-Coulter instrument. Measurements were performed between 16-24 hours after phlebotomy.

#### Replication and population variation cohort methods

**CBR: Cambridge BioResource.** CBR is a collection of pseudo-anonymised DNA samples from 8,000 healthy blood donors that has been established in 2008 and 2010 by the NIHR funded Cambridge Biomedical Research Centre in collaboration with NHS Blood and Transplant for use in genotype-phenotype association studies<sup>43</sup>. Four thousand donors each were enrolled during 2007 and 2009. Full blood counts (FBCs) were obtained from EDTA anticoagulated samples of blood drawn from the pouches of the donation collection sets. FBCs performed on an ABX Pentra 60 automated haematology analyser (ABX Diagnostics, Montpellier, France) or on a Sysmex XE-2100. For the purpose of calibration measurements, 500 blood samples were performed on both the Beckman-Coulter and Sysmex instruments. Measurements were performed between 16-24 hours after phlebotomy.

**deCODE:** Red blood parameters were measured in samples from Icelanders at the Landspítali University Hospital Laboratory or at the Icelandic Medical Center (Laeknasetrid) Laboratory in Mjodd (RAM), between the years 1990 and 2010. The measurements were normalized to a standard normal distribution using quantile-quantile normalization and then adjusted for sex, year of birth and age at measurement. For individuals for which more than one measurement was available we used the average of the normalized value.

**LURIC: Ludwigshafen Risk and Cardiovascular Health Study.** The LURIC Study is a prospective cohort study among 3,316 study participants who were routinely referred to a tertiary care medical centre in south-west Germany between 1997 and 2000<sup>44</sup>. Inclusion criteria were the availability of a coronary angiogram, German ancestry and clinical stability with the exception of acute coronary syndromes (ACS). Exclusion criteria were any acute illness other than ACS, any chronic disease where non-cardiac disease predominated and a history of malignancy within the past five years. Patients were continuously followed up with respect to fatal events. Genotyping was carried out using Affymetrix 500K or 6.0 arrays, excluding SNPs or samples with call rates <90%, gender discrepancy or relatedness. Imputation of missing HapMap2 genotypes was done using MACH.

**OGP: Ogliastra Genetic Park.** OGP is a population-based epidemiologic survey carried out in 10 Ogliastra villages (Baunei, Escalaplano, Loceri, Perdasdefogu, Seui, Seulo, Talana, Triei, Urzulei and Ussassai) between 2002 and 2008<sup>45</sup>. Mitochondrial analysis traced the original population back to the Neolithic era and showed that Ogliastra inhabitants rank among the most genetically homogenous European population and that they have the lowest values of mtDNA gene diversity with respect to other Sardinia areas. People living in the villages were invited to take part in the study by means of information campaigns and letters sent to residents. Blood count measurements were performed using Coulter LH Haematology analyser (Beckman-Coulter, Brea, CA). For each inhabitant we collected genealogical information dating back to the seventeenth century, medical and pharmacology history data and family history of many disease. Written informed consent was obtained from every participant in the study. DNA for wet-lab genotyping to replicate discovery results of the current study was available in a total of 9,704 OGP participants.

**SMART: The Secondary Manifestations of ARterial disease study.** SMART is a prospective outpatient cohort study among patients aged 18-74 years newly referred to the University Medical Center Utrecht, The Netherlands, because of atherosclerotic vascular disease or for treatment of atherosclerotic risk factors<sup>46, 47</sup>. The objective of SMART is to determine the prevalence of concomitant asymptomatic arterial disease and risk factors in patients presenting with a manifestation of arterial disease or risk factor, and to study the incidence of future cardiovascular events and their predictors in these high-risk patients. DNA for wet-lab genotyping to replicate discovery results of the current study was available in a total of 8,361 SMART participants. Wet-lab genotyping for single nucleotide polymorphism (SNP) analysis was carried out by KBiosciences, Hertfordshire, UK. ([www.kbioscience.co.uk](http://www.kbioscience.co.uk)), whose personnel were blinded to patient status, using their proprietary KASPar PCR technique and Taqman Genotype calling was carried out using an automated system, the results of which were checked manually by study personnel using SNPviewer software.

**Young Finns.** The Young Finns cohort is a Finnish longitudinal population study sample on the evolution of cardiovascular risk factors from childhood to adulthood<sup>48</sup>. The first cross-sectional study was conducted in the year 1980 in five different centres. It included 3,596 participants in the age groups of 3, 6, 9, 12, 15, and 18, who were randomly chosen from the national population register. After the baseline in 1980 these subjects have been re-examined in 1983 and 1986 as young individuals, and in 2001, 2007 and 2011 as older individuals. For the current analysis a subsample from the latest (2011) follow-up was used from Tampere and Turku (N=616, aged 33-48) where the RBC measurements were available. This study was carried out in accordance with the recommendations of the Declaration of Helsinki. All participants provided written informed consent and the study protocol was approved by the Ethics Committee. Venous blood samples were obtained and anticoagulated with EDTA. RBC parameters were measured by flow cytometric particle counting (cells) and photometry (Hb) using Sysmex XE-5000 and XT-2000i analysers (Sysmex Corporation, Kobe, Japan) with reagents provided by the manufacturer (Cellpack and Sulfolyser). The analysers were accredited by Finnish Accreditation Service (FINAS).

## Acknowledgements

**ALSPAC.** We are extremely grateful to all the individuals who took part in this study, the midwives for their help in recruiting them, and the whole ALSPAC team, which includes interviewers, computer and laboratory technicians, clerical workers, research scientists, volunteers, managers, receptionists and nurses. We thank 23andMe, the Wellcome Trust Sanger Institute, and the Laboratory Corporation of America, for generating the ALSPAC GWA data. The UK Medical Research Council (grant 74882), the Wellcome Trust (grant 076467) and the University of Bristol provide core support for ALSPAC. DME is supported by a Medical Research Council New Investigator Award (MRC G0800582 to DME). JPK was funded by a Wellcome Trust 4-year PhD studentship in molecular, genetic, and life course epidemiology (WT083431MA).

**Amish.** We thank our Amish research volunteers for their long-standing partnership in research, and the research staff at the Amish Research Clinic for their hard work and dedication. We are supported by grants and contracts from the NIH including R01 AG18728 (Amish Longevity Study), R01 HL088119 (Amish Calcification Study), U01 GM074518-04 (PAPI Study), U01 HL072515-06 (HAPI Study), U01 HL084756 and NIH K12 RR023250 (University of Maryland MCRDP), the University of Maryland General Clinical Research Center, grant M01 RR 16500, National Research Initiative Competitive Grant no. 2007-35205-17883 from the USDA National Institute of Food and Agriculture, the Baltimore Veterans Administration Medical Center Geriatrics Research and Education Clinical Center and the Paul Beeson Physician Faculty Scholars in Aging Program.

**ARIC.** The Atherosclerosis Risk in Communities Study is carried out as a collaborative study supported by National Heart, Lung, and Blood Institute contracts (HHSN268201100005C, HHSN268201100006C, HHSN268201100007C, HHSN268201100008C, HHSN268201100009C, HHSN268201100010C, HHSN268201100011C, and HHSN268201100012C), R01HL087641, R01HL59367 and R01HL086694; National Human Genome Research Institute contract U01HG004402; and National Institutes of Health contract HHSN268200625226C. The authors thank the staff and participants of the ARIC study for their important contributions. Infrastructure was partly supported by Grant Number UL1RR025005, a component of the National Institutes of Health and NIH Roadmap for Medical Research.

**CBR.** The project made use of NHSBT donors from the Cambridge BioResource (<http://www.cambridgebioresource.org.uk/>). This local resource for genotype-phenotype association studies is supported by a grant from the National Institute for Health Research (NIHR) to the Cambridge Biomedical Research Centre (which supported JS and SM), and by a NIHR programme grant to NHSBT (RP-PG-0310-1002, which supported AA, AR and WHO).

**CoLaus.** The CoLaus study was supported by research grants from the Swiss National Science Foundation (grant no: 33CSCO-122661) from GlaxoSmithKline and the Faculty of Biology and Medicine of Lausanne, Switzerland. The authors also express their gratitude to the participants in the Lausanne CoLaus study and to the investigators who have contributed to the recruitment, in particular the research nurses of CoLaus: Yolande Barreau, Anne-Lise Bastian, Binasa Ramic, Martine Moranville, Martine Baumer, Marcy Sagette, Jeanne Ecoffey, Sylvie Mermoud.

**deCODE.** The research performed at deCODE genetics was partly funded through the European Community's Seventh Framework Programme (FP7/2007-2013), ENGAGE project, grant agreement HEALTH-F4-2007- 201413.

**DESIR.** This work was funded by the French Government ("*Agence Nationale de la Recherche*"), the French Region of "*Nord Pas De Calais*" ("*Contrat de Projets État-Région*"), and the charities: "*Association Française des Diabétiques*", "*Programme National de Recherche*

*sur le Diabète*” and “*Association de Langue Française pour l’Etude du Diabète et des Maladies Métaboliques*”; as well as by Canadian funding agencies (“*Genome Canada*” and “*Génome Québec*”, and “*Fonds de recherche du Québec – Santé*”). The DESIR study has been supported by contracts with CNAMTS, Lilly, Novartis Pharma and Sanofi-Aventis, by INSERM (“*Réseaux en Santé Publique, Interactions entre les déterminants de la santé*”, “*Cohortes Santé TGIR 2008*”), by the “*Association Diabète Risque Vasculaire*”, “*Fédération Française de Cardiologie*”, “*Fondation de France*”, ALFEDIAM, ONIVINS, “*Société Francophone du Diabète*”, and by Ardix Medical, Bayer Diagnostics, Becton Dickinson, Cardionics, Merck Santé, Novo Nordisk, Pierre Fabre, Roche, Topcon. The D.E.S.I.R. Study Group: INSERM U1018: B. Balkau, P. Ducimetière, E. Eschwège; INSERM U367: F. Alhenc-Gelas; CHU D’Angers: Y. Gallois, A. Girault; Bichat Hospital: F. Fumeron, M. Marre, R. Roussel; Centre Hospitalier Universitaire de Rennes: F. Bonnet; Centre National de la Recherche Scientifique UMR 8090, Lille: S. Cauchi, P. Froguel; Medical Examination Services: Alençon, Angers, Blois, Caen, Chartres, Chateauroux, Cholet, Le Mans, Orléans and Tours; Research Institute for General Medicine: J. Cogneau; General practitioners of the region; Inter-Regional Institute for Health (IRSA): C. Born, E. Caces, M. Cailleau, N Copin, J. G. Moreau, F. Rakotozafy, J. Tichet, S. Vol. We are sincerely indebted to all subjects who participated in this study.

**EGCUT.** EGCUT received financing by (ENGAGE, OPENGENE), targeted financing from Estonian Government SF0180142s08, Estonian Research Roadmap through Estonian Ministry of Education and Research (3.2.0304.11-0312), Center of Excellence in Genomics (EXCEGEN) and Development Fund of University of Tartu (SP1GVARENG). A. Salumets was supported by the Estonian Ministry of Education and Science (Targeted project no. SF0180044s09) and Enterprise Estonia (Grant no. EU30020). We acknowledge EGCUT personnel, especially Mr V. Soo. Data analyzes were carried out in part in the High Performance Computing Center of University of Tartu.

**EPIC.** The EPIC-Norfolk study is supported by research programme grant funding from Cancer Research UK and the Medical Research Council.

**GeneBank.** The Cleveland Clinic GeneBank study is supported by NIH grants P01HL076491, P01HL098055, R01HL103866, R01HL103931, P20HL113452, and a gift from the Leonard Krieger Fund.

**INGI-CARL.** We thank Laura Esposito, Angela D’Eustacchio and Emmanouil Athanasakis for technical support. We are very grateful to the municipal administrators for their collaboration on the project and for logistic support. We would like to thank all participants to this study.

**INGI-Cilento.** We would like to address a special thank to the Cilento populations. This work was supported by grants from the Italian Ministry of Universities (FIRB -RBIN064YAT, RBNE08NKH7), the Assessorato Ricerca Regione Campania, the Ente Parco Nazionale del Cilento e Vallo di Diano, the Fondazione Banco di Napoli to MC.

**INGI-FVG.** We thank Laura Esposito, Angela D’Eustacchio and Emmanouil Athanasakis for technical support. We are very grateful to the municipal administrators for their collaboration on the project and for logistic support. We would like to thank all participants to this study. Project granted by FVG – Regional Government, and Fondo Trieste.

**INGI-Val Borbera.** We thank the inhabitants of the Val Borbera that made this study possible, the local administrations, the Tortona and Genova archdiocese and the ASL-AI, Novi Ligure (AI) for support. We particularly thank Clara Camaschella (Vita e Salute University, Milano) who supervised data collection and phenotype analysis, Federico Caligaris-Cappio (Oncology-Hsr) and the internal medicine MDs of the San Raffaele Hospital, Maria Rosa Biglieri, Diego Sabbi and Silvia Bione (IGM,CNR) for their contribution to clinical data collection. We thank Massimo



Ginestri (AsI-AI) for help with laboratory data analysis and Fiammetta Viganò for technical support. The research was supported by funds from Compagnia di San Paolo, Torino, Italy; Fondazione Cariplo, Italy and Ministry of Health, Ricerca Finalizzata 2008 to DT.

**KORA F3 and KORA F4.** The KORA research platform was initiated and financed by the Helmholtz Center Munich, German Research Center for Environmental Health, which is funded by the German Federal Ministry of Education and Research (BMBF) and by the State of Bavaria. Part of this work was financed by the German National Genome Research Network (NGFN-2 and NGFNPlus: 01GS0823). KORA research was also supported within the Munich Center of Health Sciences (MC Health) as part of LMUinnovativ.

**LBC1921 and LBC1936.** We thank the LBC1936 and LBC1921 participants and research team members. We thank the nurses and staff at the Wellcome Trust Clinical Research Facility, where subjects were tested and the genotyping was performed. We also thank the staff at the Department of Haematology, Western General Hospital for the hematology measurements. We thank the staff at the Lothian Health Board, and the staff at the SCRE Centre, University of Glasgow. The whole genome association study was funded by the Biotechnology and Biological Sciences Research Council (BBSRC). The LBC1936 research was supported by a programme grant from Research Into Ageing and continues with programme grants from Help the Aged/Research Into Ageing (Disconnected Mind). The LBC1921 data collection was funded by the BBSRC. The work was undertaken by The University of Edinburgh Centre for Cognitive Ageing and Cognitive Epidemiology, part of the cross council Lifelong Health and Wellbeing Initiative (G0700704/84698). Funding from the Biotechnology and Biological Sciences Research Council (BBSRC), Engineering and Physical Sciences Research Council (EPSRC), Economic and Social Research Council (ESRC) and Medical Research Council (MRC) is gratefully acknowledged. Lorna M. Lopez is the beneficiary of a post-doctoral grant from the AXA Research Fund.

**LifeLines.** The LifeLines Cohort Study, and generation and management of GWAS genotype data for the LifeLines Cohort Study is supported by the Netherlands Organization of Scientific Research NWO (grant 175.010.2007.006), the Economic Structure Enhancing Fund (FES) of the Dutch government, the Ministry of Economic Affairs, the Ministry of Education, Culture and Science, the Ministry for Health, Welfare and Sports, the Northern Netherlands Collaboration of Provinces (SNN), the Province of Groningen, University Medical Center Groningen, the University of Groningen, Dutch Kidney Foundation and Dutch Diabetes Research Foundation. We thank Behrooz Alizadeh, Annemieke Boesjes, Marcel Bruinenberg, Noortje Festen, Pim van der Harst, Ilja Nolte, Lude Franke, Mitra Valimohammadi for their help in creating the GWAS database, and Rob Bieringa, Joost Keers, René Oostergo, Rosalie Visser, Judith Vonk for their work related to data-collection and validation. The authors are grateful to the study participants, the staff from the LifeLines Cohort Study and Medical Biobank Northern Netherlands, and the participating general practitioners and pharmacists. LifeLines Scientific Protocol Preparation: Rudolf de Boer, Hans Hillege, Melanie van der Klauw, Gerjan Navis, Hans Ormel, Dirkje Postma, Judith Rosmalen, Joris Slaets, Ronald Stolk, Bruce Wolffenbuttel; LifeLines GWAS Working Group: Behrooz Alizadeh, Marike Boezen, Marcel Bruinenberg, Noortje Festen, Lude Franke, Pim van der Harst, Gerjan Navis, Dirkje Postma, Harold Snieder, Cisca Wijmenga, Bruce Wolffenbuttel.

**LOLIPOP.** The LOLIPOP study is supported by the National Institute for Health Research (NIHR) Comprehensive Biomedical Research Centre Imperial College Healthcare NHS Trust, the NIHR Cardiovascular Biomedical Research Unit of Royal Brompton and Harefield NHS Foundation Trust, the British Heart Foundation (SP/04/002), the Medical Research Council (G0601966, G0700931), the Wellcome Trust (084723/Z/08/Z) the NIHR (RP-PG-0407-10371), European Union FP7 (EpiMigrant, 279143) and Action on Hearing Loss (G51). We thank the participants and research staff who made the study possible.

**LURIC.** LURIC received funding through the 6th Framework Program (integrated project Bloodomics, grant LSHM-CT-2004-503485) and 7th of Framework Program (integrated project AtheroRemo, Grant Agreement number 201668) of the European Union. The authors extend appreciation to the participants of the LURIC study. We thank the LURIC study team either temporarily or permanently involved in patient recruitment, sample and data handling, and the laboratory staff at the Ludwigshafen General Hospital and the Universities of Freiburg and Ulm, Germany.

**MDC.** O Melander was supported by grants from the European Research Council (StG-282255), Swedish Medical Research Council, the Swedish Heart and Lung Foundation, the Medical Faculty of Lund University, Malmö University Hospital, the Albert Pålsson Research Foundation, the Crafoord Foundation, the Ernhold Lundströms Research Foundation, the Region Skane, the Hulda and Conrad Mossfelt Foundation, the King Gustaf V and Queen Victoria Foundation, the Lennart Hanssons Memorial Fund, and the Wallenberg Foundation. G Engström was supported by grants from the Swedish Medical Research Council (521-2011-3891), the Swedish Heart and Lung Foundation (20100288), funds from Malmö University Hospital, the Ernhold Lundströms Research Foundation, the Region Skane (LU-ALF). B Hedblad was supported by grants from the Swedish Medical Research Council, the Swedish Heart and Lung Foundation, funds from the Skåne University Hospital, the Region of Skåne and the Ernhold Lundströms Research Foundation. The GWAS study of the MDC cohort was supported by the following grants: British Heart Foundation (BHF) Chair CH/98001 to AFD; BHF Programme RG/07/005/23633 to AFD, SP; BHF Special Project Grant SP/08/005/25115 to AFD, SP; SP was supported by an intermediate research fellowship and a travel fellowship from the BHF (FS/05/095/19937; FS/10/016/28162).

**MICROS.** We thank the primary care practitioners Raffaella Stocker, Stefan Waldner, Toni Pizzocco, Josef Plangger, Ugo Marcadent and the personnel of the Hospital of Silandro (Department of Laboratory Medicine) for their participation and collaboration in the research project. In South Tyrol, the study was supported by the Ministry of Health and Department of Educational Assistance, University and Research of the Autonomous Province of Bolzano, and the South Tyrolean Sparkasse Foundation.

**NESDA.** NESDA was supported by the Geestkracht program of ZonMW [grant 10-000-1002]; matching funds from universities and mental health care institutes involved in NESDA (GGZ Buitenamstel-Geestgronden, Rivierduinen, University Medical Center Groningen, GGZ 25 Lentis, GGZ Friesland, GGZ Drenthe). Genotyping was funded by the Genetic Association Information Network (GAIN) of the Foundation for the US National Institutes of Health, and analysis were supported by grants from GAIN and the NIMH (MH081802), the Neuroscience Campus Amsterdam, and the Center for Molecular and Systems Biology (CMSB). Genotype data were obtained from dbGaP (<http://www.ncbi.nlm.nih.gov/dbgap>, accession number phs000020.v1.p1).

**NFBC1966.** We acknowledge the support of US National Heart, Lung, and Blood Institute grant HL087679 through the STAMPEED program, grants MH083268, GM053275-14 and U54 RR020278 from the US National Institutes of Health, grant DMS-0239427 from the National Science Foundation, the Medical Research Council of the UK, EURO-BLCS, QL1-CT-2000-01643 and the European Community's Seventh Framework Programme (FP7/2007-2013), ENGAGE project and grant agreement HEALTH-F4-2007-201413. The authors would like to thank the Center of Excellence in Common Disease Genetics of the Academy of Finland and Nordic Center of Excellence in Disease Genetics, the Sydantautisaatio (Finnish Foundation of Heart Diseases), the Broad Genotyping Center, D. Mirel, H. Hobbs, J. DeYoung, P. Rantakallio, M. Koironen and M. Isohanni for advice and assistance.



**NTR.** Funding was obtained from the Netherlands Organization for Scientific Research (NWO: MagW/ZonMW): Genotype/phenotype database for genetic epidemiological studies (NWO 911-09-032); Spinozapremie (SPI 56-464-14192); VENI-016.115.035; NBIC/BioAssist/RK/2008.024); BBMRI –NL: Biobanking and Biomolecular Resources Research Infrastructure (184.021.007); the Institute for Health and Care Research (EMGO+ ); Neuroscience Campus Amsterdam (NCA); European Science Foundation (ESF): Genomewide analyses of European twin and population cohorts (EU/QLRT-2001-01254); European Community's Seventh Framework Program (FP7/2007-2013): ENGAGE (HEALTH-F4-2007-201413); the European Science Council : Genetics of Mental Illness (ERC- 230374); Rutgers University Cell and DNA Repository cooperative agreement (NIMH U24 MH068457-06); Collaborative study of the genetics of DZ twinning (NIH R01D0042157-01A); the Genetic Association Information Network, a public–private partnership between the NIH and Pfizer Inc., Affymetrix Inc. and Abbott Laboratories; and the National Institutes of Mental Health (NIMH): GODOT: Integration of Genomics & Transcriptomics in Normal Twins & Major Depression (1RC2 MH089951-01) and DETECT: Developmental Trajectories in Twins (1RC2MH089995-01).

**OGP.** We thank the Ogliastra population and all the individuals who participated in this study. We are very grateful to the municipal administrations for their collaboration to the project and for economic and logistic support. This work was supported by grants from the Italian Ministry of Education, University and Research (MIUR) no.5571/DSPAR/2002 and (FIRB) D. M. no. 718/Ric/2005.

**PREVEND.** PREVEND genetics is supported by the Dutch Kidney Foundation (Grant E033), the National Institutes of Health (grant LM010098), The Netherlands organisation for health research and development (NWO VENI grant 916.761.70 and 916.111.05), the Dutch Interuniversity Cardiology Institute Netherlands (ICIN), and the Landsteiner Foundation for Blood Transfusion Research (LSBR, grant 1133).

**QIMR.** We thank the Brisbane twins and their families for their participation; Dixie Statham, Ann Eldridge, Marlene Grace (sample collection); Anjali Henders, Leanne Wallace, Lisa Bowdler, Steven Crooks (sample processing); David Smyth, Harry Beeby (IT support). Funding: Australian National Health and Medical Research Council (241944, 339462, 339446, 389927, 389875, 389891, 389892, 389938, 443036, 442915, 442981, 496739, 552485, 552498, 613627, 619667); Australian Research Council (A7960034, A79906588, A79801419, DP0212016, DP0343921).

**SardiNIA.** The SardiNIA team was supported by Contracts NO1-AG-1-2109 and HHSN271201100005C from the NIA, and in part by the Intramural Research Program of the National Institute on Aging (NIA), National Institutes of Health (NIH). The SardiNIA authors are grateful to the many volunteers who generously participate in the study, to Monsignore Piseddu, Bishop of Ogliastra, to the Mayors and administrations of the four towns involved and the Head of Public Health Unit ASL4 in Ogliastra.

**SHIP.** SHIP is part of the Community Medicine Research net of the University of Greifswald, Germany, which is funded by the Federal Ministry of Education and Research (grants no. 01ZZ9603, 01ZZ0103, and 01ZZ0403), the Ministry of Cultural Affairs as well as the Social Ministry of the Federal State of Mecklenburg-West Pomerania, and the network 'Greifswald Approach to Individualized Medicine (GANI\_MED)' funded by the Federal Ministry of Education and Research (grant 03IS2061A). Genome-wide data have been supported by the Federal Ministry of Education and Research (grant no. 03ZIK012) and a joint grant from Siemens Healthcare, Erlangen, Germany and the Federal State of Mecklenburg- West Pomerania. The University of Greifswald is a member of the 'Center of Knowledge Interchange' program of the Siemens AG and the Caché Campus program of the InterSystems GmbH.

**Sorbs.** Financial support was received from the German Research Council (KFO-152), IZKF (B27) and the German Diabetes Association. We would like to thank Knut Krohn (Microarray Core Facility of the Interdisciplinary Centre for Clinical Research, University of Leipzig) for the genotyping/analytical support and Joachim Thiery (Institute of Laboratory Medicine, Clinical Chemistry and Molecular Diagnostics, University of Leipzig) for clinical chemistry services. We thank Nigel W. Rayner (WTCHG, University of Oxford, UK) for the excellent bioinformatics support. This research of Dr. Inga Prokopenko and Dr. Vasiliki Lagou was part funded through the European Community's Seventh Framework Programme (FP7/2007-2013), ENGAGE project, grant agreement HEALTH-F4-2007-201413.

**SMART.** This research was financially supported by BBMRI-NL, a Research Infrastructure financed by the Dutch government (NWO 184.021.007). Folkert W. Asselbergs is supported by a clinical fellowship from the Netherlands Organisation for Health Research and Development (ZonMw grant 90700342).

**TwinsUK.** The TwinsUK study is grateful to the volunteer twins who made available their time. We thank the staff from the genotyping facilities at the Wellcome Trust Sanger Institute and the Center for Inherited Disease Research as part of a National Eye Institute/National Institutes of Health project grant. This study received funding from the Wellcome Trust; the European Community's Seventh Framework Program grant agreement (FP7/2007-2013); ENGAGE project grant agreement (HEALTH-F4-2007-201413); the Department of Health via the National Institute for Health Research (NIHR) Comprehensive Biomedical Research Centre award to Guy's & St Thomas' NHS Foundation Trust in partnership with King's College London. T.D.S. is an NIHR senior investigator. Nicole Soranzo's team is funded by the Wellcome Trust (Sanger Institute, Grant Code 098051), the EU FP7 (EPIGENESYS Grant Code 257082) and FP7 (BLUEPRINT Grant Code HEALTH-F5-2011-282510).

**UKBS-CC.** The UK Blood Services collection of Common Controls (UKBS-CC collection), funded by the Wellcome Trust grants 076113/C/04/Z and 084183/Z/07/Z and by the Juvenile Diabetes Research Foundation grant WT061858, was established as part of the Wellcome Trust Case-Control Consortium, with the support of the blood services of England, Scotland and Wales. We gratefully acknowledge the generosity of the blood donors in England, Scotland and Wales who have made their DNA samples available to this project as a "free gift".

**YoungFinns.** The Young Finns Study has been financially supported by the Academy of Finland: grants 134309 (Eye), 126925, 121584, 124282, 129378 (Salve), 117787 (Gendi), and 41071 (Skidi), the Social Insurance Institution of Finland, Kuopio, Tampere and Turku University Hospital Medical Funds (grant 9M048 and 9N035 for TeLeht), Juho Vainio Foundation, Paavo Nurmi Foundation, Finnish Foundation of Cardiovascular Research and Finnish Cultural Foundation, Tampere Tuberculosis Foundation and Emil Aaltonen Foundation (T.L). The expert technical assistance in the statistical analyses by Ville Aalto and Irina Lisinen is gratefully acknowledged.

**Drosophila studies.** Ulrich Elling was supported by a grant from the FWF (Project I434-B13). Gerald Wirnsberger was funded from the European Community's Seventh Framework Programme (FP7/2007-2013) under grant agreement n° 223151 - INFLA-CARE. Maria Novatchkova and Urszula Puc were funded by IMBA. Josef Penninger has received funding from the European Community's Seventh Framework Programme (FP7/2007-2013) / ERC grant agreement n° 233407 - COMBINE and was supported by grants from IMBA, the Austrian Ministry of Sciences, and the Austrian Academy of Sciences, and GEN-AU (Austro-Mouse).

**Expression QTL studies.** LF received a Horizon Breakthrough grant from the Netherlands Genomics Initiative (93519031), a VENI grant from NWO (ZonMW grant 916.10.135), a SIA-

raakPRO subsidy for project BioCOMP and a grant from the European Community's Health Seventh Framework Programme (FP7/2007-2013) under grant agreement n° 259867.

**Formaldehyde-assisted isolation of regulatory elements (FAIRE) studies.** We thank S.F. Garner (Department of Haematology, University of Cambridge & NHS Blood and Transplant, Cambridge, UK), D.M. Bloxham (Department of Haematology, University of Cambridge & Addenbrooke's Hospital, Cambridge) and all donors and staff at the NHS Blood and Transplant, Cambridge, UK. We thank the core informatics, library-making and sequencing teams at the Wellcome Trust Sanger Institute. D.S. Paul and K. Voss are supported by the Marie-Curie Initial Training Network NetSim (EC-215820). C.A. Albers and A. Rendon are funded by the British Heart Foundation Program Grant RG/09/12/28096. J. Stephens and W.H. Ouwehand are supported by a grant from the National Institutes for Health Research (RP-PG-0310-1002). N. Soranzo and P. Deloukas are supported by the Wellcome Trust (098051).

**Supplementary Table 1.** Characteristics of participants in the genome-wide and replication cohorts. Results are provided as mean (SD) or %.

| Cohort                 | Country     | Design       | N    | Female (%) | Age (yrs)   | Hb (g/dl)    | MCH (pg)     | MCHC (g/dl)  | MCV (fl)     | PCV (%)      | RBC (10 <sup>12</sup> /l) |
|------------------------|-------------|--------------|------|------------|-------------|--------------|--------------|--------------|--------------|--------------|---------------------------|
| <b>European GWA</b>    |             |              |      |            |             |              |              |              |              |              |                           |
| ALSPAC                 | UK          | Population   | 2526 | 47.7       | 7.5 (0.2)   | 12.45 (0.72) | -            | -            | -            | -            | -                         |
| AMISH                  | USA         | Population   | 1578 | 50.4       | 48.4 (16.2) | 13.8 (1.2)   | 30.9 (1.35)  | 34.2 (0.69)  | 90.4 (3.49)  | 40.5 (0.08)  | 4.47 (0.39)               |
| COLAUS                 | Switzerland | Population   | 854  | 56.7       | 59.3 (10.7) | 14.34 (1.21) | 30.04 (1.54) | 33.37 (0.87) | 90.11 (4.14) | 43.02 (3.20) | 4.78 (0.42)               |
| DESIR                  | France      | Population   | 716  | 24.9       | 50.4 (8.1)  | 13.86 (1.14) | 29.93 (1.61) | 30.47 (0.91) | 91.12 (4.33) | -            | 4.64 (0.37)               |
| EGCUT                  | Estonia     | Population   | 893  | 50.7       | 37.5 (15.6) | 14.3 (1.44)  | 29.7 (1.71)  | 33.7 (1.05)  | 88.0 (4.32)  | 42.3 (3.7)   | 4.81 (0.45)               |
| EPIC-case              | UK          | Population   | 844  | 56.9       | 59.3 (8.8)  | 14.01 (1.30) | 30.26 (1.56) | 33.99 (1.15) | 89.11 (3.93) | 41.21 (3.77) | 4.64 (0.43)               |
| EPIC-cohort            | UK          | Population   | 1847 | 53.2       | 59.3 (9.0)  | 13.86 (1.23) | 30.50 (1.58) | 34.16 (1.09) | 89.26 (3.97) | 40.56 (3.61) | 4.55 (0.41)               |
| GeneBank               | USA         | Case-cohort  | 2671 | 28.3       | 63.0 (11.2) | 13.27 (1.48) | 30.71 (1.62) | 34.51 (0.96) | 88.14 (5.57) | 38.90 (4.08) | 4.34 (0.49)               |
| INGI CARL              | Italy       | Population   | 520  | 59.8       | 50.4 (16.3) | 13.83 (1.40) | 29.45 (2.35) | 33.36 (1.50) | 88.14 (5.57) | 41.49 (3.91) | 4.73 (0.44)               |
| INGI CILENTO           | Italy       | Population   | 855  | 55.4       | 52.5 (19.4) | 13.90 (1.47) | 29.31 (2.75) | 32.95 (1.22) | 88.85 (7.1)  | 42.17 (4.19) | 4.74 (0.48)               |
| INGI FVG               | Italy       | Population   | 1205 | 59.8       | 51.7 (16.4) | 14.01 (1.35) | 29.88 (1.50) | 33.00 (1.00) | 90.18 (4.00) | 42.36 (3.36) | 4.73 (0.42)               |
| INGI Val Borbera       | Italy       | Population   | 1662 | 56.0       | 54.7 (18.3) | 14.5 (1.3)   | 30.1 (1.6)   | 33.0 (1.1)   | 91.0 (4.3)   | 43.7 (3.6)   | 4.8 (0.4)                 |
| KORA-F3                | Germany     | Population   | 1642 | 50.6       | 62.5 (10.1) | 14.18 (1.14) | 30.89 (1.44) | 33.71 (0.68) | 91.55 (3.79) | 42.11 (3.35) | 4.6 (0.39)                |
| KORA-F4                | Germany     | Population   | 1813 | 51.2       | 60.9 (8.9)  | 14.11 (1.15) | 31.2 (1.53)  | 34.1 (0.73)  | 91.44 (4.0)  | 41.42 (3.2)  | 4.53 (0.37)               |
| LBC1921                | UK          | Population   | 496  | 57.9       | 79.1 (0.6)  | 13.46 (1.31) | -            | -            | 90.78 (4.50) | 39.46 (3.60) | 4.35 (0.41)               |
| LBC1936                | UK          | Population   | 987  | 49.2       | 69.6 (0.8)  | 14.55 (1.26) | -            | -            | 91.06 (4.04) | 42.06 (3.57) | 4.62 (0.41)               |
| LIFELINES              | Netherlands | Population   | 8080 | 52.1       | 47.9 (11.2) | 14.04 (1.26) | 29.92 (1.67) | 33.39 (1.07) | 89.60 (4.43) | 42.02 (3.18) | 4.70 (0.39)               |
| LOLIPOP-EW610          | UK          | Population   | 927  | 26.9       | 56.0 (9.8)  | 14.66 (1.28) | 30.77 (1.89) | 34.01 (0.92) | 90.48 (5.08) | 43.13 (3.88) | 4.78 (0.46)               |
| LOLIPOP-EW-A           | UK          | Population   | 589  | 12.9       | 54.3 (10.4) | 14.65 (1.22) | 30.66 (1.99) | 33.97 (0.74) | 90.32 (5.18) | 43.14 (3.62) | 4.78 (0.43)               |
| LOLIPOP-EW-P           | UK          | Case-control | 652  | 0.0        | 55.7 (9.1)  | 14.88 (1.03) | 30.75 (1.63) | 33.90 (0.78) | 90.72 (4.22) | 43.94 (3.13) | 4.86 (0.40)               |
| MDC                    | Sweden      | Population   | 1699 | 58.0       | 57.4 (5.9)  | 13.9 (1.04)  | 30.3 (1.46)  | 33.8 (0.98)  | 89.6 (3.5)   | 41.2 (2.9)   | 4.6 (0.37)                |
| MICROS                 | Italy       | Population   | 1213 | 56.5       | 45.8 (16.3) | 14.93 (1.41) | 30.67 (1.89) | 34.48 (0.77) | 88.91 (4.80) | -            | 4.87 (0.45)               |
| NESDA                  | Netherlands | Case-cohort  | 1739 | 67.8       | 42.4 (12.5) | 13.96 (1.22) | 31.40 (1.71) | 33.89 (0.93) | 89.34 (4.09) | 41.22 (3.35) | 4.62 (0.40)               |
| NFBC                   | Finland     | Population   | 4761 | 52.0       | 31          | 14.17 (1.35) | 30.30 (1.69) | 33.84 (0.98) | 89.88 (4.71) | 41.63 (3.87) | 4.64 (0.45)               |
| NTR                    | Netherlands | Twins        | 1740 | 64.0       | 45.3 (14.1) | 14.13 (1.21) | 30.75 (1.40) | 33.39 (0.65) | 92.07 (3.85) | -            | 4.62 (0.41)               |
| PREVEND                | Netherlands | Population   | 3121 | 48.8       | 49.3 (12.0) | 13.77 (1.16) | -            | 33.67 (0.67) | 90.66 (4.08) | 40.88 (3.39) | -                         |
| QIMR                   | Australian  | Twins        | 2538 | 51.2       | 15.0 (2.9)  | 13.8 (0.96)  | 29.0 (1.3)   | 33.1 (0.82)  | 87.4 (3.7)   | -            | 4.8 (0.34)                |
| SardinIA               | Italy       | Population   | 4694 | 56.3       | 43.3 (17.6) | 13.86 (1.49) | 28.88 (3.58) | 33.28 (1.18) | 86.61 (9.31) | 41.62 (4.03) | 4.85 (0.57)               |
| SHIP                   | Germany     | Population   | 3183 | 52.0       | 54.5 (15.3) | 14.07 (1.30) | 30.79 (1.54) | 33.93 (0.98) | 90.68 (4.00) | 41.45 (3.60) | 4.58 (0.43)               |
| Sorbs                  | Germany     | Population   | 934  | 59.1       | 47.7 (16.3) | 14.20 (1.26) | 30.07 (1.45) | 34.12 (0.95) | 88.04 (3.91) | 41.59 (3.27) | 4.73 (0.39)               |
| TwinsUK                | UK          | Twins        | 3419 | 93.0       | 52.0 (13.4) | 13.43 (1.09) | 29.96 (1.85) | 32.44 (1.41) | 92.45 (5.25) | 41.45 (3.31) | 4.49 (0.37)               |
| UKBS-CC                | UK          | Population   | 2155 | 50.0       | 43.7 (12.3) | 14.0 (1.13)  | 29.97 (1.65) | 33.92 (0.68) | 88.28 (4.30) | -            | 4.67 (1.08)               |
| <b>South Asian GWA</b> |             |              |      |            |             |              |              |              |              |              |                           |
| LOLIPOP-IA610          | UK          | Case-control | 6557 | 15.7       | 55.4 (10.6) | 14.41 (1.56) | 28.87 (2.50) | 33.41 (1.19) | 86.67 (6.47) | 37.3 (14.9)  | 4.96 (0.53)               |
| LOLIPOP-IA300          | UK          | Population   | 2139 | 0.0        | 48.3 (10.5) | 14.94 (1.23) | 29.05 (2.46) | 33.61 (1.09) | 86.39 (6.32) | 44.5 (3.5)   | 5.18 (0.50)               |
| LOLIPOP-IA-P           | UK          | Case-control | 612  | 0.0        | 51.1 (8.3)  | 14.77 (1.11) | 29.11 (2.32) | 33.55 (0.85) | 86.73 (5.88) | 44.0 (3.6)   | 5.10 (0.44)               |

| Cohort                      | Country     | Design      | N     | Female (%) | Age (yrs)   | Hb (g/dl)    | MCH (pg)    | MCHC (g/dl)  | MCV (fl)     | PCV (%)      | RBC (10 <sup>12</sup> /l) |
|-----------------------------|-------------|-------------|-------|------------|-------------|--------------|-------------|--------------|--------------|--------------|---------------------------|
| <b>Replication</b>          |             |             |       |            |             |              |             |              |              |              |                           |
| deCODE                      | Iceland     | Population  | 34843 | 58.6       | 65.6 (17.0) | 12.9 (11.3)  | 30.3 (2.2)  | 33.5 (1.1)   | 90.5 (5.6)   | 38.4 (4.8)   | 4.21 (0.64)               |
| CBR                         | UK          | Population  | 9136  | 53.4       | 49.0 (12.9) | 14.0 (1.1)   | 29.87 (1.8) | 33.5 (1.0)   | 89.1 (4.3)   | 41.8 (3.3)   | 4.7 (0.4)                 |
| OGP                         | Italy       | Population  | 8192  | 56.1       | 49.7(17.9)  | 14.3 (1.3)   | 30.0 (2.4)  | 34.2 (0.8)   | 87.5 (6.0)   | 41.9 (3.8)   | 4.8 (0.7)                 |
| PREVEND                     | Netherlands | Population  | 2974  | 57.7       | 49.5 (12.8) | 13.7 (1.2)   | 30.5 (1.7)  | 33.6 (0.7)   | 90.6 (4.5)   | 40.5 (3.6)   | 4.5 (0.4)                 |
| SMART                       | Netherlands | Case-cohort | 8361  | 32.0       | 57 (12)     | 14.3 (1.2)   | -           | -            | -            | 41.9 (3.5)   | -                         |
| <b>Population variation</b> |             |             |       |            |             |              |             |              |              |              |                           |
| EGCUT-stage2                | Estonia     | Population  | 738   | 44.9       | 53.6 (15.8) | 14.4 (1.42)  | 30.0 (1.76) | 33.3 (1.74)  | 90.0 (4.45)  | 43.3 (3.92)  | 4.81 (0.45)               |
| Lifelines-stage2            | Netherlands | Population  | 5241  | 60.0       | 50.1 (11.8) | 14.06 (1.21) | 30.0 (1.64) | 33.61 (0.96) | 89.49 (4.31) | 41.81 (3.08) | 4.69 (0.38)               |
| LURIC - Graz                | Germany     | Case-cohort | 804   | 34.0       | 60.0 (12.0) | 13.8 (1.5)   | 30.4 (1.8)  | 34.2 (1.3)   | 89.0 (4.7)   | 40.0 (4.0)   | 4.6 (0.5)                 |
| LURIC - HD                  | Germany     | Case-cohort | 2124  | 28.8       | 63.6 (7.0)  | 13.8 (1.5)   | 30.4 (1.8)  | 34.1 (1.1)   | 89.2 (4.8)   | 40.0 (4.0)   | 4.6 (0.5)                 |
| NTR-stage2                  | Netherlands | Twins       | 3746  | 62.1       | 39.5(15.1)  | 14.1 (1.33)  | 30.4 (2.00) | 20.7 (1.19)  | 92.3 (4.71)  | 42.5 (3.95)  | 4.65 (0.45)               |
| Young Finns                 | Finland     | Population  | 616   | 51.9       | 41.9 (5.1)  | 14.2 (1.3)   | 30.2 (1.7)  | 33.6 (1.0)   | 89.5 (4.3)   | 42.1 (3.3)   | 4.7 (0.4)                 |

**Supplementary Table 2.** Summary of study genotyping methods in the genome-wide association cohorts.

|                  | Platform (s)                       | Genotype calling | Sample call rate cut-off | SNP call rate cut-off     | MAF cut off | P <sub>-HWE</sub> cut-off | SNPs   | Imputation package | NCBI build  | GWAS statistics package                              | Study-specific Covariates    |
|------------------|------------------------------------|------------------|--------------------------|---------------------------|-------------|---------------------------|--------|--------------------|-------------|------------------------------------------------------|------------------------------|
| ALSPAC           | Illumina 317 / 610                 | GenCall          | 0.97                     | 0.97 (317),<br>0.95 (610) | 0.05        | 5.0E-07                   | 285531 | MACH               | 36          | MACH2QTL                                             | PC1-2                        |
| AMISH            | Affymetrix                         | BRLMM            | 0.95                     | 0.95                      | 0.01        | 1.0E-06                   | 338598 | MACH v1.0.15       | 36;<br>v22  | Measured genotype accounting for polygenic component | Adjusted for relatedness     |
| COLAUS           | Affimatrix 500K                    | BRLMM            | 0.9                      | 0.7                       | 0.01        | 4.07E-04                  | 390631 | IMPUTE v0.2.0      | 35          | Matlab                                               | PC1-2                        |
| DESIR            | Illumina 300K                      | BeadStudio       | 0.95                     | 0.9                       | 0.01        | 1.0E-03                   | 291609 | IMPUTE             | 36          | SNPTEST v2                                           |                              |
| EGCUT            | Illumina Human370CNV / OmniExpress | GenomeStudio     | 0.95                     | 0.95                      | 0.01        | 4.07E-04                  | 189000 | IMPUTE             | 36;<br>v22  | SNPTEST                                              | PC 1-3                       |
| EPIC-case        | Affymetrix 500K                    | BRLMM            | 0.9                      | 0.9                       | 0.01        | 1.0E-06                   | 382037 | IMPUTE v0.3.1      | 35          | SNPTEST                                              |                              |
| EPIC-cohort      | Affymetrix 500K                    | BRLMM            | 0.9                      | 0.9                       | 0.01        | 1.0E-06                   | 382037 | IMPUTE 0.3.1       | 35          | SNPTEST                                              |                              |
| GeneBank         | Affymetrix 6.0                     | Birdseed         | 0.97                     | 0.95                      | 0.01        | 1.0E-04                   | 562554 | MACH v1.0.16       | 36;<br>v22  | PLINK                                                | CAD case-control status, age |
| INGI CARL        | Illumina 370CNV                    | Beadstudio       | 0.9                      | 0.9                       | 0.01        | 1.0E-04                   | 276271 | MACH v1.0.16       | 36;<br>v22  | GenABEL/<br>ProbABEL                                 | Linear Mixed Model           |
| INGO CILENTO     | Illumina 370K                      | GenomeStudio     | NA                       | 0.95                      | NA          | NA                        | 305009 | MACH v1.0.16a      | 36;<br>v22  | R, linear model, GenABEL and ProbABEL                |                              |
| INGI FVG         | Illumina 370CNV                    | Beadstudio       | 0.95                     | 0.9                       | 0.01        | 1.0E-04                   | 276271 | MACH v1.0.16       | 36;<br>v22  | GenABEL/<br>ProbABEL                                 | Linear Mixed Model           |
| INGI Val Borbera | Illumina 370k                      | BeadStudio       | 0.95                     | 0.9                       | 0.01        | 1.0E-04                   | 324319 | MACH               | 36,<br>v22  | GenABEL - ProbABEL                                   | Age, MDS1-3                  |
| KORA-F3          | Affymetrix 500K                    | BRLMM            | 0.93                     | -                         | -           | -                         | 490033 | IMPUTE             | 35          | SNPTEST v2.1.1                                       | Age, sex                     |
| KORA-F4          | Affymetrix1000K                    | Birdseed2        | 0.93                     | 0.93                      | -           | -                         | 909622 | IMPUTE             | 36          | SNPTEST v2.1.1                                       | Age, sex                     |
| LBC1921          | Illumina Human610                  | Illumina         | 0.95                     | 0.98                      | 0.01        | 1.0E-03                   | 535709 | MACH               | 36          | MACH2QTL                                             | PC1-4                        |
| LBC1936          | Illumina Human610                  | Illumina         | 0.95                     | 0.98                      | 0.01        | 1.0E-03                   | 535709 | MACH               | 36          | MACH2QTL                                             | PC1-4                        |
| Lifelines        | Illumina CytoSNP12 V2              | Illumina         | QC filters               | 0.95                      | 0.01        | 1.0E-05                   | 257581 | BEAGLE v3.1.0      | 36, rel 23a | PLINK                                                |                              |
| LOLIPOP-EW610    | Illumin Human610                   | Beadstudio       | 0.95                     | 0.9                       | 0.01        | 1.0E-06                   | 544620 | MACH               | 36,<br>v22  | MACH2QTL                                             | PC1-10                       |
| LOLIPOP-EW-A     | Affymetrix 500K                    | BRLMM            | 0.95                     | 0.9                       | 0.01        | 1.0E-06                   | 374773 | MACH               | 35,<br>v21  | MACH2QTL                                             | PC1-10                       |
| LOLIPOP-EW-P     | Perlegen Custom                    | Perlegen         | 0.95                     | 0.9                       | 0.01        | 1.0E-06                   | 202544 | MACH               | 35,<br>v21  | MACH2QTL                                             | PC1-10                       |
| LOLIPOP-         | Illumin Human610                   | Beadstudio       | 0.95                     | 0.9                       | 0.01        | 1.0E-                     | 544620 | MACH               | 36,         | MACH2QTL                                             | PC1-10                       |



|               |                                                           |                                  |      |                                           |                              |         |         |               |             |                   |                           |
|---------------|-----------------------------------------------------------|----------------------------------|------|-------------------------------------------|------------------------------|---------|---------|---------------|-------------|-------------------|---------------------------|
| IA610         |                                                           |                                  |      |                                           |                              | 06      |         |               | v22         |                   |                           |
| LOLIPOP-IA300 | Illumina HumanHap 300K                                    | BeadStudio                       | 0.95 | 0.9                                       | 0.01                         | 1.0E-06 | 245892  | MACH          | 35, v21     | MACH2QTL          | PC1-10                    |
| LOLIPOP-IA-P  | Perlegen custom                                           | Perlegen                         | 0.95 | 0.9                                       | 0.01                         | 1.0E-06 | 170055  | MACH          | 35, v21     | MACH2QTL          | PC1-10                    |
| MDC           | Illumina 610Quad                                          | BeadStudio                       | 0.95 | 0.9                                       | 0.01                         | 5.0E-07 | 521220  | IMPUTE v2     | 36, v22     | SNPTEST           | PC1-3                     |
| MICROS        | Illumina HumHap300                                        | BeadStudio                       | 0.95 | 0.98                                      | 0.01                         | 1.0E-06 | 292.917 | MACH v1.0.16  | 36          | ProbABEL          | Study location (village)  |
| NESDA         | Perlegen 600K                                             | Perlegen                         | 0.95 | 0.95                                      | 0.01                         | -       | 435291  | IMPUTE v0.3.2 | 36, v22     | SNPTEST v2.1.1    | PC1-5                     |
| NFBC          | Illumina Infinium 370 cnvDuo array                        | Beadstudio                       | 0.95 | 0.95                                      | 0.01                         | 1.0E-04 | 328 007 | IMPUTE v.1.0  | 35          | SNPTEST           | PC1-10                    |
| NTR           | Perlegen 600K                                             | Perlegen                         | 0.95 | 0.95                                      | 0.01                         | -       | 435,291 | IMPUTE v0.3.2 | 36, v22     | Merlin            | Age, time of collection   |
| PREVEND       | Illumina CytoSNP12 v2                                     | GenomeStudio                     | 0.95 | 0.98                                      | 0.01                         | 1.0E-5  | 244868  | BEAGLE v3.1.0 | 36, rel 23a | PLINK             |                           |
| QIMR          | Illumina Human610                                         | BeadStudio                       | 0.95 | 0.95                                      | 0.01                         | 1.0E-06 | 269,840 | MACH          | 36, I+II    | Merlin            | Age                       |
| SardiNIA      | Affymetrix 10K, 500K, 6.0                                 | BRLMM (10K/500K), Birdseed (6.0) | 0.95 | 0.90 (10K, 500K); 0.95 (6.0)              | 0.05 (10K, 500K); 0.01 (6.0) | 1.0E-06 | 731,209 | MACH          | 36          | Merlin            | Alphacarrier, betacarrier |
| SHIP          | Affymetrix SNP 6.0                                        | Birdseed V2                      | 0.92 | -                                         | -                            | -       | 869,224 | IMPUTE v0.5.0 | 36          | QUICKTEST 0.95    | PC1-10                    |
| Sorbs         | Affymetrix 500K and 6.0                                   | BRLMM ( 500K), Birdseed (6.0)    | -    | 0.95                                      | 0.01                         | 1.0E-04 | 378,513 | IMPUTE v1.0.0 | 35          | GenABEL, ProbABEL | PC1-3                     |
| TwinsUK       | Illumina HumanHap300, HumanHap610Q, 1M-Duo and 1.2MDuo 1M | Illuminus calling algorithm      | 0.98 | 0.97 for MAF>0.05, 0.99 for 0.01<MAF<0.05 | 0.01                         | 1.0E-06 | 534,633 | IMPUTE v2     | 36          | MERLIN            | Instrument, PC1-2         |
| UKBS-CC       | Affymetrix Genome-Wide Human SNP Array 6.0                | Chiamo                           | 0.90 | 0.90                                      | 0.01                         | 1.0E-06 | 2492005 | IMPUTE v2     | 36          | SNPTEST           |                           |

**Supplementary Table 3. Genomic control inflation factors**

|                                  | <b>Gender</b> | <b>Hb</b> | <b>MCH</b> | <b>MCHC</b> | <b>MCV</b> | <b>PCV</b> | <b>RBC</b> |
|----------------------------------|---------------|-----------|------------|-------------|------------|------------|------------|
| <b><u>Meta-analysis</u></b>      |               |           |            |             |            |            |            |
| - Europeans                      |               | 1.10      | 1.13       | 1.08        | 1.14       | 1.10       | 1.14       |
| - South Asians                   |               | 1.02      | 1.04       | 1.02        | 1.04       | 1.03       | 1.03       |
| - Combined                       |               | 1.10      | 1.13       | 1.08        | 1.14       | 1.10       | 1.14       |
| <b><u>Individual cohorts</u></b> |               |           |            |             |            |            |            |
| ALSPAC                           | F             | 1.00      |            |             |            |            |            |
| ALSPAC                           | M             | 0.99      |            |             |            |            |            |
| Amish                            | F             | 1.04      | 1.05       | 1.04        | 1.07       | 1.03       | 1.05       |
| Amish                            | M             | 1.05      | 1.03       | 1.07        | 1.04       | 1.04       | 1.01       |
| CoLaus                           | F             | 1.02      | 1.01       | 1.00        | 1.01       | 1.01       | 1.01       |
| CoLaus                           | M             | 1.00      | 1.03       | 0.99        | 1.02       | 1.00       | 1.00       |
| DESIR                            | F             | 1.00      | 1.01       | 1.02        | 1.00       | 1.01       | 1.01       |
| DESIR                            | M             | 1.00      | 1.01       | 1.02        | 1.00       | 1.01       | 1.01       |
| EGCUT                            | F             | 1.01      | 1.02       | 1.02        | 1.02       | 1.01       | 1.04       |
| EGCUT                            | M             | 1.03      | 1.01       | 1.01        | 1.02       | 1.02       | 1.02       |
| EPIC_case                        | F             | 1.01      | 1.01       | 1.00        | 1.01       | 1.01       | 1.02       |
| EPIC_case                        | M             | 1.01      | 0.99       | 1.01        | 1.02       | 1.02       | 1.01       |
| EPIC_cohort                      | F             | 1.01      | 1.02       | 1.03        | 1.01       | 0.99       | 0.99       |
| EPIC_cohort                      | M             | 1.01      | 1.01       | 1.00        | 1.01       | 1.00       | 1.02       |
| GeneBank                         | F             | 1.01      | 1.00       | 1.01        | 1.00       | 1.01       | 1.01       |
| GeneBank                         | M             | 0.98      | 1.05       | 1.02        | 1.08       | 0.99       | 1.02       |
| INGI CARL                        | F             | 1.01      | 0.99       | 1.01        | 1.00       | 1.00       | 1.00       |
| INGI CARL                        | M             | 0.99      | 1.00       | 1.02        | 0.99       | 1.02       | 1.02       |
| INGI CILEN                       | F             | 1.01      | 1.00       | 0.99        | 1.00       | 1.01       | 0.99       |
| INGI CILEN                       | M             | 1.00      | 0.99       | 1.00        | 1.03       | 1.00       | 1.00       |
| INGI FVG                         | F             | 1.03      | 1.06       | 1.06        | 1.03       | 1.03       | 1.01       |
| INGI FVG                         | M             | 0.99      | 1.00       | 1.03        | 0.98       | 0.98       | 0.98       |
| INGI ValBorbera                  | F             | 1.00      | 1.00       | 1.01        | 1.00       | 1.01       | 1.00       |
| INGI ValBorbera                  | M             | 1.01      | 1.01       | 1.01        | 1.00       | 1.00       | 1.00       |
| KORA F3                          | F             | 1.02      | 1.01       | 1.01        | 1.01       | 1.02       | 1.01       |
| KORA F3                          | M             | 1.01      | 1.02       | 1.01        | 1.02       | 1.01       | 1.01       |
| KORA F4                          | F             | 0.99      | 1.01       | 1.00        | 1.01       | 0.99       | 1.00       |
| KORA F4                          | M             | 1.01      | 1.02       | 1.01        | 1.01       | 1.01       | 1.01       |
| LBC1921                          | F             | 1.01      |            |             | 0.99       | 1.01       | 1.00       |
| LBC1921                          | M             | 0.99      |            |             | 1.00       | 0.99       | 1.00       |
| LBC1936                          | F             | 1.00      |            |             | 1.00       | 0.99       | 1.00       |
| LBC1936                          | M             | 1.00      |            |             | 0.99       | 1.00       | 0.99       |
| LIFELINES                        | F             | 1.01      | 1.03       | 1.04        | 1.03       | 1.02       | 1.05       |
| LIFELINES                        | M             | 1.02      | 1.01       | 1.03        | 1.02       | 1.03       | 1.03       |
| LOLIPOP EW_A                     | M             | 1.01      | 1.00       | 1.00        | 1.01       | 1.01       | 1.00       |
| LOLIPOP EW_P                     | M             | 1.00      | 1.00       | 1.00        | 1.00       | 1.00       | 1.00       |
| LOLIPOP EW610                    | F             | 1.01      | 1.00       | 0.99        | 1.00       | 1.00       | 1.01       |
| LOLIPOP EW610                    | M             | 1.00      | 1.01       | 1.01        | 1.00       | 1.00       | 1.00       |
| LOLIPOP IA_P                     | M             | 0.99      | 1.01       | 1.02        | 1.02       | 0.98       | 1.02       |
| LOLIPOP IA300                    | M             | 1.01      | 1.02       | 1.02        | 1.02       | 1.00       | 1.01       |
| LOLIPOP IA610                    | F             | 1.01      | 1.01       | 1.01        | 0.99       | 1.01       | 1.03       |
| LOLIPOP IA610                    | M             | 1.03      | 1.05       | 1.02        | 1.05       | 1.02       | 1.02       |
| MDC                              | F             | 1.01      | 1.01       | 1.00        | 1.01       | 1.02       | 1.00       |
| MDC                              | M             | 1.01      | 1.01       | 1.00        | 1.01       | 1.01       | 1.00       |
| MICROS                           | F             | 0.99      | 1.01       | 1.00        | 1.01       | 0.99       | 1.00       |
| MICROS                           | M             | 0.99      | 1.01       | 1.01        | 1.01       | 1.00       | 1.00       |
| NESDA                            | F             | 1.02      | 1.01       | 1.00        | 1.02       | 1.02       | 1.02       |
| NESDA                            | M             | 1.02      | 1.01       | 1.02        | 1.03       | 1.03       | 1.02       |
| NFBC                             | F             | 1.02      | 1.01       | 1.00        | 1.01       | 1.03       | 1.02       |

|                 |   |      |      |      |      |      |      |
|-----------------|---|------|------|------|------|------|------|
| <b>NFBC</b>     | M | 1.02 | 1.01 | 1.02 | 1.00 | 1.02 | 1.01 |
| <b>Prevend</b>  | F | 1.02 |      | 1.00 | 1.03 | 1.02 |      |
| <b>Prevend</b>  | M | 1.03 |      | 1.00 | 1.02 | 1.02 |      |
| <b>QIMR-NTR</b> | F | 1.00 | 1.00 | 1.00 | 1.00 |      | 1.00 |
| <b>QIMR-NTR</b> | M | 1.05 | 1.00 | 1.05 | 1.00 |      | 1.00 |
| <b>SardiNIA</b> | F | 1.08 | 1.08 | 1.14 | 1.13 | 1.07 | 1.09 |
| <b>SardiNIA</b> | M | 1.01 | 1.10 | 1.14 | 1.12 | 1.03 | 1.05 |
| <b>SHIP</b>     | F | 0.99 | 1.00 | 0.99 | 1.01 | 1.00 | 1.01 |
| <b>SHIP</b>     | M | 1.01 | 1.01 | 1.02 | 1.01 | 1.00 | 0.99 |
| <b>Sorbs</b>    | F | 0.98 | 1.00 | 1.01 | 0.98 | 0.98 | 1.00 |
| <b>Sorbs</b>    | M | 1.00 | 0.99 | 1.00 | 0.99 | 0.99 | 0.99 |
| <b>TwinsUK</b>  | F | 1.00 | 1.00 | 1.01 | 1.01 | 1.02 | 1.00 |
| <b>TwinsUK</b>  | M | 1.02 | 1.01 | 1.02 | 1.02 | 1.02 | 1.02 |
| <b>UKBS-CC</b>  | F | 1.00 | 1.00 | 1.00 | 1.01 | 1.01 | 1.01 |
| <b>UKBS-CC</b>  | M | 1.02 | 1.01 | 1.01 | 1.00 | 1.01 | 1.01 |

**Supplementary Table 4.** Excel spreadsheet (online) providing association test results for all SNPs reaching  $P < 10^{-6}$  in the red blood cell genome-wide association study.

**Supplementary Table 5.** Excel spreadsheet (online) providing genome-wide association and replication test results for the 75 sentinel SNPs.

**Supplementary Table 6.** Association in the European GWA samples (current study) for SNPs previously reported to be associated with red blood cell phenotypes.<sup>2-6, 49</sup> SNPs that are not highlighted reach the conventional threshold for genome-wide significance ( $P < 5 \times 10^{-8}$ ), SNPs highlighted yellow replicate at  $P < 0.05$ , SNPs highlighted in green do not show replication.

| No   | Region   | SNP        | Position  | Discovery GWA |         | Current study |             | Authors            |
|------|----------|------------|-----------|---------------|---------|---------------|-------------|--------------------|
|      |          |            |           | Pheno         | P       | N             | P           |                    |
| 1    | 1q22     | rs6684514  | 154522080 | MCHC          | 3.0E-09 | 48976         | 4.8E-01     | Kamatani Y         |
| 2    | 1q23     | rs857721   | 156879172 | MCHC          | 1.0E-10 | 56429         | 1.6E-15     | Ganesh SK          |
| 3    | 1q31     | rs12127588 | 196862129 | MCH           | 7.0E-10 | 35962         | 7.0E-02     | Kamatani Y         |
| 4    | 1q44     | rs11204538 | 246112895 | MCV           | 2.0E-08 | 30151         | 1.8E-02     | Kamatani Y         |
| 5    | 2p21     | rs10495928 | 46206670  | HB            | 7.0E-13 | 52101         | 1.0E-13     | Ganesh SK          |
|      | 2p21     | rs10495928 | 46206670  | RBC           | 4.0E-08 | 44613         | 6.4E-10     | Kamatani Y         |
|      | 2p21     | rs10168349 | 46214411  | MCV           | 4.0E-15 | 53027         | 2.6E-16     | Ganesh SK          |
| 6    | 2p16     | rs2540917  | 60462263  | MCV           | 1.0E-14 | 57790         | 1.2E-12     | Ganesh SK          |
| 7    | 3p24     | rs9310736  | 24325815  | MCH           | 4.0E-10 | 51406         | 3.4E-15     | Kamatani Y         |
|      | 3p24     | rs9310736  | 24325815  | MCV           | 3.0E-08 | 57810         | 6.0E-16     | Kamatani Y, Ding K |
| 8    | 3q29     | rs9859260  | 197284944 | MCV           | 8.0E-14 | 51918         | 2.3E-10     | Ganesh SK          |
|      | 3q29     | rs11915082 | 197293536 | MCH           | 8.0E-13 | 46748         | 2.9E-13     | Ganesh SK          |
| 9    | 4q12     | rs218237   | 55088929  | MCH           | 3.0E-25 | 43231         | 1.0E-18     | Kamatani Y         |
|      | 4q12     | rs218237   | 55088929  | RBC           | 2.0E-17 | 45064         | 2.3E-32     | Kamatani Y         |
|      | 4q12     | rs172629   | 55102519  | MCV           | 1.0E-15 | 51865         | 1.9E-25     | Ganesh SK          |
| 10   | 5p15     | rs4580814  | 1166244   | MCHC          | 5.0E-10 | 33137         | 1.2E-04     | Kamatani Y         |
|      | 5p15     | rs2736100  | 1339516   | RBC           | 3.0E-08 | 31725         | 2.2E-03     | Kamatani Y         |
| 11   | 6p22     | rs17342717 | 25929749  | MCH           | 5.0E-08 | 37058         | 9.6E-40     | Kullo IJ           |
|      | 6p22     | rs1408272  | 25950930  | MCH           | 1.0E-11 | 36605         | 4.8E-67     | Ferreira MA        |
|      | 6p22     | rs1408272  | 25950930  | MCH           | 4.0E-39 | 36605         | 4.8E-67     | Ganesh SK          |
|      | 6p22     | rs1800562  | 26201120  | HB            | 6.0E-19 | 34188         | 5.6E-13     | Ganesh SK          |
|      | 6p22     | rs1800562  | 26201120  | MCH           | 3.0E-09 | 29711         | 6.5E-56     | Kullo IJ           |
|      | 6p22     | rs1800562  | 26201120  | MCH           | 3.0E-09 | 29711         | 6.5E-56     | Kullo IJ           |
|      | 6p22     | rs1800562  | 26201120  | MCV           | 2.0E-08 | 31217         | 1.2E-42     | Benyamin B         |
|      | 6p22     | rs1800562  | 26201120  | MCV           | 1.0E-46 | 31217         | 1.2E-42     | Ganesh SK          |
|      | 6p22     | rs1800562  | 26201120  | MCV           | 1.0E-23 | 31217         | 1.2E-42     | Soranzo N          |
|      | 6p22     | rs1800562  | 26201120  | PCV           | 2.0E-09 | 32016         | 4.3E-05     | Ganesh SK          |
| 6p22 | rs198846 | 26215442   | HB        | 1.0E-08       | 60869   | 1.4E-30       | Chambers JC |                    |
| 12   | 6p21     | rs3218097  | 42013253  | RBC           | 1.0E-10 | 49292         | 2.8E-16     | Kamatani Y         |
|      | 6p21     | rs9349205  | 42033137  | MCH           | 8.0E-20 | 43669         | 1.0E-21     | Ganesh SK          |
|      | 6p21     | rs9349205  | 42033137  | MCV           | 1.0E-31 | 46928         | 5.5E-30     | Ganesh SK          |
|      | 6p21     | rs11970772 | 42033268  | MCV           | 7.0E-19 | 58026         | 4.9E-32     | Soranzo N          |
| 13   | 6q21     | rs9374080  | 109723113 | MCV           | 4.0E-10 | 46686         | 2.3E-18     | Ganesh SK          |
|      | 6q21     | rs11966072 | 109741521 | MCH           | 1.0E-08 | 5054          | 1.9E-02     | Kamatani Y         |
|      | 6q21     | rs11966072 | 109741521 | RBC           | 7.0E-09 | 5093          | 1.0E-02     | Kamatani Y         |
| 14   | 6q23     | rs7775698  | 135460328 | MCH           | 5.0E-13 | 39576         | 2.4E-73     | Ferreira MA        |
|      | 6q23     | rs7775698  | 135460328 | MCH           | 3.0E-66 | 39576         | 2.4E-73     | Kamatani Y         |
|      | 6q23     | rs7775698  | 135460328 | MCH           | 1.0E-15 | 39576         | 2.4E-73     | Kullo IJ           |
|      | 6q23     | rs7775698  | 135460328 | MCV           | 8.0E-18 | 45966         | 1.5E-78     | Ferreira MA        |
|      | 6q23     | rs7775698  | 135460328 | MCV           | 3.0E-56 | 45966         | 1.5E-78     | Kamatani Y         |
|      | 6q23     | rs7775698  | 135460328 | RBC           | 1.0E-14 | 41602         | 2.6E-70     | Kullo IJ           |
|      | 6q23     | rs7776054  | 135460609 | MCH           | 7.0E-69 | 56217         | 6.6E-108    | Ganesh SK          |
|      | 6q23     | rs9373124  | 135464902 | MCHC          | 7.0E-14 | 56151         | 1.3E-13     | Ganesh SK          |
|      | 6q23     | rs4895441  | 135468266 | MCV           | 7.0E-86 | 57837         | 1.0E-107    | Ganesh SK          |
|      | 6q23     | rs9402686  | 135469510 | MCV           | 7.0E-42 | 57853         | 1.7E-106    | Soranzo N          |

|    |       |            |           |      |         |       |         |             |
|----|-------|------------|-----------|------|---------|-------|---------|-------------|
|    | 6q23  | rs9494145  | 135474245 | MCV  | 3.0E-15 | 53763 | 1.1E-89 | Kullo IJ    |
|    | 6q23  | rs9483788  | 135477194 | PCV  | 3.0E-15 | 52759 | 3.2E-17 | Ganesh SK   |
|    | 6q23  | rs9483788  | 135477194 | RBC  | 1.0E-47 | 53332 | 5.8E-75 | Ganesh SK   |
|    | 6q23  | rs6569992  | 135493845 | MCH  | 1.0E-08 | 45630 | 6.3E-55 | Kullo IJ    |
|    | 6q23  | rs6569992  | 135493845 | MCV  | 3.0E-08 | 47188 | 3.9E-48 | Kullo IJ    |
|    | 6q23  | rs6569992  | 135493845 | RBC  | 6.0E-09 | 44394 | 1.4E-50 | Kullo IJ    |
| 15 | 6q24  | rs628751   | 139880112 | MCH  | 1.0E-17 | 50565 | 2.8E-26 | Ganesh SK   |
|    | 6q24  | rs643381   | 139881116 | MCV  | 5.0E-25 | 41038 | 7.8E-27 | Ganesh SK   |
| 16 | 7p12  | rs12718597 | 50395922  | MCV  | 5.0E-13 | 36413 | 2.2E-11 | Ganesh SK   |
| 17 | 7q22  | rs7786877  | 100051951 | MCV  | 3.0E-11 | 45829 | 8.0E-10 | Ganesh SK   |
|    | 7q22  | rs7385804  | 100073906 | PCV  | 4.0E-10 | 41886 | 7.9E-04 | Ganesh SK   |
|    | 7q22  | rs7385804  | 100073906 | RBC  | 5.0E-10 | 45574 | 1.6E-17 | Soranzo N   |
|    | 7q22  | rs2075671  | 100183042 | RBC  | 1.0E-09 | 48904 | 1.9E-07 | Ganesh SK   |
| 18 | 7q36  | rs10224002 | 151045974 | HB   | 3.0E-15 | 49958 | 1.2E-13 | Ganesh SK   |
|    | 7q36  | rs10224002 | 151045974 | PCV  | 6.0E-15 | 41868 | 1.3E-11 | Ganesh SK   |
| 19 | 8p21  | rs7843479  | 21876759  | MCV  | 3.0E-08 | 45518 | 2.2E-01 | Kamatani Y  |
| 20 | 9p24  | rs10758658 | 4846877   | MCH  | 2.0E-14 | 56189 | 1.4E-14 | Ganesh SK   |
|    | 9p24  | rs10758658 | 4846877   | MCV  | 3.0E-20 | 57827 | 5.2E-19 | Ganesh SK   |
| 21 | 9q34  | rs8176746  | 135121143 | MCHC | 4.0E-08 | 44984 | 8.7E-05 | Kamatani Y  |
|    | 9q34  | rs495828   | 135144688 | HB   | 1.0E-11 | 52848 | 1.6E-15 | Kamatani Y  |
|    | 9q34  | rs495828   | 135144688 | PCV  | 6.0E-10 | 44764 | 1.5E-13 | Kamatani Y  |
|    | 9q34  | rs495828   | 135144688 | RBC  | 3.0E-12 | 45331 | 1.4E-15 | Kamatani Y  |
| 22 | 10q11 | rs2279434  | 45275070  | MCH  | 4.0E-12 | 47419 | 2.9E-07 | Kamatani Y  |
|    | 10q11 | rs11239550 | 45344735  | MCV  | 1.0E-10 | 57985 | 4.6E-15 | Ganesh SK   |
| 23 | 10q11 | rs7085433  | 51263360  | MCH  | 6.0E-10 | 25731 | 4.9E-02 | Kamatani Y  |
|    | 10q11 | rs7085433  | 51263360  | MCV  | 7.0E-09 | 27222 | 3.9E-02 | Kamatani Y  |
| 24 | 10q21 | rs16926246 | 70763398  | HB   | 2.0E-11 | 40486 | 6.0E-19 | Ganesh SK   |
|    | 10q21 | rs16926246 | 70763398  | PCV  | 1.0E-13 | 32401 | 1.5E-15 | Ganesh SK   |
| 25 | 12p13 | rs11611647 | 4204180   | RBC  | 6.0E-09 | 44531 | 1.2E-08 | Kamatani Y  |
| 26 | 12q24 | rs11065987 | 110556807 | HB   | 1.0E-11 | 56136 | 1.7E-13 | Ganesh SK   |
|    | 12q24 | rs11065987 | 110556807 | PCV  | 1.0E-12 | 48077 | 1.5E-10 | Ganesh SK   |
| 27 | 14q23 | rs4466998  | 64545293  | MCV  | 5.0E-08 | 43114 | 8.4E-07 | Ganesh SK   |
| 28 | 15q22 | rs6494537  | 63838399  | MCH  | 3.0E-09 | 42140 | 5.0E-06 | Kamatani Y  |
|    | 15q22 | rs8035639  | 63731602  | MCH  | 8.0E-09 | 34982 | 1.3E-05 | Ding K      |
| 29 | 16p13 | rs7189020  | 244804    | MCV  | 2.0E-12 | 48237 | 1.3E-10 | Ganesh SK   |
|    | 16p13 | rs1122794  | 249156    | MCH  | 3.0E-10 | 31659 | 3.3E-09 | Ganesh SK   |
| 30 | 16q24 | rs9937239  | 85664621  | MCHC | 9.0E-08 | 40048 | 0.24    | Ding K      |
|    | 16q24 | rs837763   | 87381230  | MCHC | 5.0E-10 | 37768 | 1.9E-22 | Ding K      |
|    | 16q24 | rs837763   | 87381230  | MCHC | 4.0E-13 | 37768 | 1.9E-22 | Kamatani Y  |
| 31 | 19p13 | rs7255045  | 12793269  | MCV  | 2.0E-12 | 53098 | 4.0E-05 | Ganesh SK   |
| 32 | 19p13 | rs11085824 | 12862547  | MCH  | 1.0E-11 | 45954 | 1.6E-19 | Ganesh SK   |
| 33 | 20q13 | rs6013509  | 50751758  | HB   | 1.0E-10 | 46778 | 2.9E-02 | Ganesh SK   |
| 34 | 20q13 | rs6092477  | 55425101  | MCV  | 1.0E-08 | 45588 | 1.5E-11 | Kamatani Y  |
| 35 | 22q11 | rs4821112  | 20294761  | MCV  | 1.0E-08 | 57847 | 9.3E-09 | Kamatani Y  |
| 36 | 22q12 | rs9609565  | 31197528  | MCV  | 4.0E-10 | 57799 | 7.9E-09 | Soranzo N   |
| 37 | 22q12 | rs855791   | 35792882  | HB   | 2.0E-13 | 46184 | 4.6E-40 | Chambers JC |
|    | 22q12 | rs855791   | 35792882  | HB   | 3.0E-25 | 46184 | 4.6E-40 | Ganesh SK   |
|    | 22q12 | rs855791   | 35792882  | MCH  | 1.0E-12 | 41609 | 1.0E-69 | Kullo IJ    |
|    | 22q12 | rs855791   | 35792882  | MCV  | 1.0E-10 | 43197 | 2.4E-54 | Benyamin B  |
|    | 22q12 | rs855791   | 35792882  | MCV  | 5.0E-09 | 43197 | 2.4E-54 | Kullo IJ    |
|    | 22q12 | rs5756506  | 35797338  | MCH  | 1.0E-09 | 56070 | 6.3E-33 | Soranzo N   |
|    | 22q12 | rs4820268  | 35799537  | MCH  | 3.0E-10 | 39276 | 2.7E-51 | Ferreira MA |



|    |       |           |          |      |         |       |         |             |
|----|-------|-----------|----------|------|---------|-------|---------|-------------|
|    | 22q12 | rs4820268 | 35799537 | MCHC | 1.0E-12 | 39276 | 5.6E-12 | Kullo IJ    |
|    | 22q12 | rs4820268 | 35799537 | MCV  | 4.0E-12 | 40974 | 3.4E-52 | Ferreira MA |
|    | 22q12 | rs2413450 | 35800170 | MCH  | 9.0E-34 | 44912 | 1.2E-55 | Ganesh SK   |
|    | 22q12 | rs2413450 | 35800170 | MCV  | 3.0E-41 | 46593 | 1.3E-50 | Ganesh SK   |
|    | 22q12 | rs2413450 | 35800170 | PCV  | 2.0E-13 | 41533 | 2.5E-15 | Ganesh SK   |
| 38 | 22q13 | rs470119  | 49313780 | MCH  | 4.0E-08 | 44146 | 2.2E-12 | Kamatani Y  |

**Supplementary Table 7.** Comprehensive list of locus-phenotype associations identified. Locus sentinel: 1 = the discovery association for the locus (SNP with lowest P value against any red blood cell phenotype); 0 = secondary phenotype(s) associated with the locus at  $P < 1 \times 10^{-8}$

| Region | SNP        | BP        | Pheno | Replication testing | Total N | P=      | Locus sentinel | Novel |
|--------|------------|-----------|-------|---------------------|---------|---------|----------------|-------|
| 1p36   | rs1175550  | 3681388   | MCHC  | 0                   | 50425   | 8.6E-15 | 1              | 1     |
| 1p34   | rs3916164  | 39842526  | MCH   | 1                   | 91874   | 3.1E-10 | 1              | 1     |
| 1p32   | rs741959   | 47448820  | MCV   | 0                   | 58002   | 6.0E-10 | 1              | 1     |
| 1q23   | rs857684   | 156842353 | MCHC  | 0                   | 56373   | 3.5E-16 | 1              | 0     |
| 1q23   | rs3737515  | 156864131 | MCV   | 1                   | 92648   | 8.3E-09 | 0              | 1     |
| 1q32   | rs7529925  | 197273831 | RBC   | 1                   | 86337   | 8.3E-09 | 1              | 1     |
| 1q32   | rs7551442  | 201921744 | MCHC  | 0                   | 50411   | 9.7E-12 | 1              | 1     |
| 1q32   | rs4951381  | 201927461 | MCV   | 1                   | 86736   | 2.2E-09 | 0              | 1     |
| 1q32   | rs9660992  | 203516073 | MCH   | 0                   | 51249   | 7.1E-10 | 1              | 1     |
| 1q32   | rs9660992  | 203516073 | MCV   | 0                   | 57652   | 1.0E-09 | 0              | 1     |
| 1q44   | rs3811444  | 246106074 | RBC   | 0                   | 34323   | 4.5E-10 | 1              | 1     |
| 1q44   | rs3811444  | 246106074 | MCV   | 0                   | 35742   | 2.2E-09 | 0              | 0     |
| 2p21   | rs4953318  | 46208555  | PCV   | 0                   | 53032   | 3.1E-19 | 1              | 0     |
| 2p21   | rs4953318  | 46208555  | HB    | 0                   | 61099   | 2.3E-16 | 0              | 0     |
| 2p21   | rs4953318  | 46208555  | RBC   | 0                   | 53605   | 1.7E-12 | 0              | 0     |
| 2p16   | rs243070   | 60473790  | MCV   | 0                   | 57740   | 4.4E-13 | 1              | 0     |
| 2p16   | rs13027161 | 60461232  | MCH   | 0                   | 51373   | 7.2E-12 | 0              | 1     |
| 2p16   | rs2540913  | 60464316  | RBC   | 0                   | 53229   | 6.0E-13 | 0              | 1     |
| 2q13   | rs10207392 | 111566130 | MCV   | 1                   | 104493  | 4.4E-11 | 1              | 1     |
| 3p24   | rs9310736  | 24325815  | MCV   | 0                   | 57810   | 6.1E-16 | 1              | 0     |
| 3p24   | rs9310736  | 24325815  | MCH   | 0                   | 51406   | 3.4E-15 | 0              | 0     |
| 3p24   | rs9310736  | 24325815  | RBC   | 0                   | 53356   | 5.4E-14 | 0              | 1     |
| 3q22   | rs6776003  | 142749183 | MCV   | 1                   | 101281  | 3.7E-11 | 1              | 1     |
| 3q23   | rs13061823 | 143603476 | MCV   | 0                   | 57678   | 4.7E-13 | 1              | 1     |
| 3q23   | rs7615316  | 143838616 | MCH   | 1                   | 86235   | 6.8E-09 | 0              | 1     |
| 3q29   | rs11717368 | 197318754 | MCH   | 0                   | 51664   | 6.6E-19 | 1              | 0     |
| 3q29   | rs11717368 | 197318754 | MCV   | 0                   | 58067   | 2.0E-14 | 0              | 0     |
| 4q11   | rs218238   | 55089781  | RBC   | 0                   | 53374   | 2.8E-39 | 1              | 0     |
| 4q11   | rs218238   | 55089781  | PCV   | 0                   | 52802   | 2.9E-12 | 0              | 1     |
| 4q11   | rs218238   | 55089781  | HB    | 0                   | 60868   | 1.5E-11 | 0              | 1     |
| 4q11   | rs218264   | 55103632  | MCV   | 0                   | 56287   | 3.8E-32 | 0              | 0     |
| 4q11   | rs218264   | 55103632  | MCH   | 0                   | 49888   | 7.4E-28 | 0              | 0     |
| 4q27   | rs13152701 | 122970511 | MCV   | 0                   | 53708   | 9.0E-10 | 1              | 1     |
| 6p23   | rs6914805  | 16389166  | MCH   | 0                   | 47195   | 1.2E-19 | 1              | 1     |
| 6p23   | rs6914805  | 16389166  | MCV   | 0                   | 51868   | 2.2E-11 | 0              | 1     |
| 6p21   | rs1408272  | 25950930  | MCH   | 0                   | 36605   | 4.8E-67 | 1              | 0     |
| 6p21   | rs1408272  | 25950930  | MCV   | 0                   | 39868   | 3.2E-47 | 0              | 0     |
| 6p21   | rs198846   | 26215442  | HB    | 0                   | 60869   | 1.4E-30 | 0              | 0     |
| 6p21   | rs198846   | 26215442  | MCHC  | 0                   | 56189   | 7.5E-21 | 0              | 1     |
| 6p21   | rs198846   | 26215442  | PCV   | 0                   | 52802   | 3.5E-10 | 0              | 0     |
| 6p22   | rs13219787 | 27969649  | MCH   | 0                   | 42060   | 5.9E-17 | 1              | 1     |
| 6p22   | rs2097775  | 30462282  | HB    | 0                   | 61058   | 1.3E-10 | 1              | 1     |

|       |            |           |      |   |       |          |   |   |
|-------|------------|-----------|------|---|-------|----------|---|---|
| 6p22  | rs2097775  | 30462282  | MCH  | 0 | 51613 | 2.3E-11  | 0 | 1 |
| 6p21  | rs9272219  | 32710247  | RBC  | 0 | 49302 | 4.3E-10  | 1 | 1 |
| 6p21  | rs9349204  | 42022356  | MCV  | 0 | 53153 | 2.4E-40  | 1 | 0 |
| 6p21  | rs3218108  | 42010633  | RBC  | 0 | 53404 | 5.2E-19  | 0 | 0 |
| 6p21  | rs11968166 | 42033282  | MCH  | 0 | 51388 | 9.4E-34  | 0 | 0 |
| 6p12  | rs9369427  | 43919408  | HB   | 0 | 60855 | 5.6E-12  | 1 | 1 |
| 6p12  | rs9369427  | 43919408  | PCV  | 0 | 52787 | 1.5E-09  | 0 | 1 |
| 6q21  | rs1008084  | 109733658 | MCH  | 0 | 51455 | 6.4E-26  | 1 | 0 |
| 6q21  | rs6568571  | 109719945 | MCV  | 0 | 57762 | 1.6E-22  | 0 | 0 |
| 6q21  | rs6568571  | 109719945 | RBC  | 0 | 53309 | 2.1E-18  | 0 | 0 |
| 6q21  | rs1341271  | 109724235 | MCHC | 1 | 91057 | 2.1E-12  | 0 | 1 |
| 6q23  | rs9389269  | 135468852 | MCV  | 0 | 57855 | 2.6E-109 | 1 | 0 |
| 6q23  | rs7776054  | 135460609 | MCH  | 0 | 51453 | 6.6E-108 | 0 | 0 |
| 6q23  | rs7776054  | 135460609 | MCHC | 0 | 56217 | 1.3E-14  | 0 | 0 |
| 6q23  | rs9373124  | 135464902 | RBC  | 0 | 53337 | 5.1E-97  | 0 | 0 |
| 6q23  | rs9373124  | 135464902 | PCV  | 0 | 52764 | 3.9E-22  | 0 | 0 |
| 6q23  | rs9389269  | 135468852 | HB   | 0 | 60896 | 3.3E-10  | 0 | 1 |
| 6q24  | rs590856   | 139886122 | MCV  | 0 | 58041 | 5.0E-36  | 1 | 0 |
| 6q24  | rs590856   | 139886122 | MCH  | 0 | 51638 | 3.8E-28  | 0 | 0 |
| 6q26  | rs736661   | 164402826 | MCH  | 0 | 51397 | 1.6E-11  | 1 | 1 |
| 6q26  | rs9356181  | 164397016 | MCV  | 1 | 92591 | 3.7E-09  | 0 | 1 |
| 7p13  | rs12718598 | 50395939  | MCV  | 0 | 37967 | 1.6E-13  | 1 | 0 |
| 7p13  | rs7385935  | 50398365  | RBC  | 0 | 36708 | 1.8E-11  | 0 | 1 |
| 7q22  | rs2075672  | 100078232 | RBC  | 0 | 41805 | 1.9E-20  | 1 | 0 |
| 7q22  | rs7385804  | 100073906 | MCV  | 0 | 46944 | 1.8E-15  | 0 | 0 |
| 7q22  | rs2075672  | 100078232 | MCH  | 0 | 39779 | 3.5E-19  | 0 | 1 |
| 7q22  | rs1734910  | 100147480 | MCHC | 1 | 74688 | 3.5E-09  | 0 | 1 |
| 7q22  | rs1734910  | 100147480 | PCV  | 1 | 71217 | 2.1E-17  | 0 | 0 |
| 7q36  | rs10480300 | 151036938 | HB   | 0 | 49771 | 7.8E-15  | 1 | 0 |
| 7q36  | rs10224210 | 151044127 | RBC  | 0 | 45569 | 7.0E-13  | 0 | 1 |
| 7q36  | rs10224210 | 151044127 | PCV  | 0 | 41880 | 5.7E-12  | 0 | 0 |
| 8p11  | rs4737009  | 41749562  | MCHC | 0 | 54462 | 4.9E-11  | 1 | 1 |
| 8p11  | rs6987853  | 42576607  | MCHC | 0 | 52954 | 6.1E-11  | 1 | 1 |
| 9p24  | rs2236496  | 4834265   | MCV  | 0 | 53761 | 1.4E-19  | 1 | 0 |
| 9p24  | rs2236496  | 4834265   | MCH  | 0 | 47382 | 2.3E-16  | 0 | 0 |
| 9p24  | rs10758658 | 4846877   | RBC  | 0 | 53374 | 2.3E-11  | 0 | 0 |
| 9q34  | rs579459   | 135143989 | RBC  | 0 | 53362 | 9.3E-18  | 1 | 0 |
| 9q34  | rs7853989  | 135121413 | HB   | 0 | 60898 | 1.1E-17  | 0 | 0 |
| 9q34  | rs579459   | 135143989 | PCV  | 0 | 52789 | 7.6E-14  | 0 | 0 |
| 10q11 | rs901683   | 45286428  | MCV  | 0 | 58051 | 1.5E-16  | 1 | 0 |
| 10q11 | rs10900128 | 44713207  | RBC  | 0 | 53403 | 2.9E-12  | 0 | 1 |
| 10q11 | rs901683   | 45286428  | MCH  | 0 | 51648 | 1.8E-12  | 0 | 0 |
| 10q22 | rs10159477 | 70769894  | HB   | 0 | 45553 | 4.4E-20  | 1 | 0 |
| 10q22 | rs16926246 | 70763398  | MCV  | 1 | 72577 | 1.0E-09  | 0 | 1 |
| 10q22 | rs10159477 | 70769894  | PCV  | 0 | 37078 | 3.8E-16  | 0 | 0 |
| 10q24 | rs11190134 | 101272190 | MCH  | 1 | 86210 | 1.3E-10  | 1 | 1 |
| 11p15 | rs11042125 | 8894625   | HB   | 1 | 95803 | 1.5E-09  | 1 | 1 |
| 11p15 | rs7936461  | 9997462   | PCV  | 1 | 84200 | 1.0E-09  | 1 | 1 |

|       |            |           |      |   |        |         |   |   |
|-------|------------|-----------|------|---|--------|---------|---|---|
| 11p15 | rs10500721 | 10160186  | HB   | 1 | 95722  | 9.7E-09 | 0 | 1 |
| 11q13 | rs2302264  | 66964002  | MCV  | 0 | 57841  | 1.3E-10 | 1 | 1 |
| 11q13 | rs11601325 | 66983582  | MCH  | 1 | 82182  | 9.8E-09 | 0 | 1 |
| 11q13 | rs7125949  | 72686732  | HB   | 1 | 83983  | 2.1E-09 | 1 | 1 |
| 12p13 | rs7312105  | 2393616   | PCV  | 1 | 93989  | 3.2E-09 | 1 | 1 |
| 12p13 | rs10849023 | 4202739   | MCH  | 0 | 42647  | 7.5E-12 | 1 | 1 |
| 12p13 | rs10849023 | 4202739   | MCV  | 0 | 45906  | 1.9E-11 | 0 | 1 |
| 12p13 | rs11611647 | 4204180   | RBC  | 1 | 77610  | 1.4E-11 | 0 | 0 |
| 12q22 | rs11104870 | 87353425  | RBC  | 1 | 86405  | 6.2E-11 | 1 | 1 |
| 12q24 | rs3184504  | 110368991 | HB   | 0 | 56784  | 4.3E-19 | 1 | 0 |
| 12q24 | rs3184504  | 110368991 | PCV  | 0 | 48711  | 7.9E-16 | 0 | 0 |
| 12q24 | rs3184504  | 110368991 | RBC  | 0 | 49291  | 1.8E-12 | 0 | 1 |
| 12q24 | rs3829290  | 119610821 | MCV  | 1 | 86709  | 2.1E-09 | 1 | 1 |
| 12q24 | rs3829290  | 119610821 | MCH  | 1 | 82035  | 9.2E-09 | 0 | 1 |
| 14q23 | rs7155454  | 64571992  | MCH  | 0 | 51228  | 1.8E-12 | 1 | 1 |
| 14q24 | rs11627546 | 69435677  | MCV  | 1 | 104591 | 1.1E-09 | 1 | 1 |
| 14q32 | rs17616316 | 102892515 | MCH  | 1 | 90431  | 8.2E-11 | 1 | 1 |
| 15q21 | rs1532085  | 56470658  | HB   | 1 | 81428  | 6.7E-11 | 1 | 1 |
| 15q22 | rs2572207  | 63857747  | MCV  | 1 | 92608  | 3.4E-09 | 1 | 1 |
| 15q22 | rs2572207  | 63857747  | MCH  | 1 | 86206  | 1.1E-16 | 0 | 0 |
| 15q24 | rs8028632  | 73108315  | MCV  | 0 | 53602  | 6.9E-10 | 1 | 1 |
| 15q24 | rs11072566 | 74081026  | HB   | 1 | 115702 | 3.0E-10 | 1 | 1 |
| 15q25 | rs2867932  | 76378092  | MCHC | 1 | 91040  | 3.3E-09 | 1 | 1 |
| 16p11 | rs11248850 | 103598    | MCH  | 0 | 51345  | 6.3E-23 | 1 | 0 |
| 16p11 | rs11248850 | 103598    | MCV  | 0 | 57749  | 4.4E-19 | 0 | 0 |
| 16q22 | rs2271294  | 66459827  | RBC  | 1 | 86678  | 1.1E-09 | 1 | 1 |
| 16q24 | rs10445033 | 87367963  | MCHC | 0 | 42050  | 1.5E-22 | 1 | 0 |
| 16q24 | rs837763   | 87381230  | HB   | 0 | 42032  | 7.1E-11 | 0 | 1 |
| 17p11 | rs888424   | 19926019  | MCH  | 0 | 51274  | 5.4E-20 | 1 | 1 |
| 17p11 | rs17759083 | 19904197  | MCV  | 0 | 57707  | 1.5E-17 | 0 | 1 |
| 17q11 | rs2070265  | 24099550  | MCH  | 0 | 51503  | 5.1E-14 | 1 | 1 |
| 17q11 | rs7215310  | 24112752  | MCV  | 1 | 92812  | 1.5E-09 | 0 | 1 |
| 17q11 | rs7221773  | 24227014  | MCHC | 1 | 90942  | 4.2E-12 | 0 | 1 |
| 17q12 | rs8182252  | 34981476  | RBC  | 1 | 82891  | 5.9E-09 | 1 | 1 |
| 17q21 | rs2269906  | 39649863  | MCHC | 0 | 56263  | 2.0E-11 | 1 | 1 |
| 17q21 | rs12150672 | 41182408  | RBC  | 0 | 53489  | 4.7E-12 | 1 | 1 |
| 17q21 | rs12150672 | 41182408  | PCV  | 0 | 52920  | 2.7E-09 | 0 | 1 |
| 17q21 | rs17426106 | 41184706  | HB   | 1 | 95789  | 4.9E-09 | 0 | 1 |
| 17q25 | rs4969184  | 73905008  | HB   | 1 | 95722  | 7.0E-09 | 1 | 1 |
| 18q21 | rs4890633  | 42087276  | MCH  | 0 | 51375  | 1.9E-23 | 1 | 1 |
| 18q21 | rs4890633  | 42087276  | MCV  | 0 | 57778  | 1.1E-17 | 0 | 1 |
| 19p13 | rs2159213  | 2087102   | HB   | 1 | 95656  | 1.9E-09 | 1 | 1 |
| 19p13 | rs2159213  | 2087102   | PCV  | 1 | 87602  | 2.7E-09 | 0 | 1 |
| 19p13 | rs12982593 | 2126891   | RBC  | 1 | 81802  | 2.0E-11 | 0 | 1 |
| 19p13 | rs732716   | 4317219   | MCV  | 0 | 58044  | 1.5E-14 | 1 | 1 |
| 19p13 | rs732716   | 4317219   | MCH  | 0 | 51641  | 6.0E-13 | 0 | 1 |
| 19p13 | rs741702   | 12885250  | MCH  | 0 | 45178  | 8.2E-20 | 1 | 0 |
| 19p13 | rs11085824 | 12862547  | RBC  | 0 | 44718  | 5.9E-12 | 0 | 1 |

|       |            |          |      |   |        |         |   |   |
|-------|------------|----------|------|---|--------|---------|---|---|
| 19p13 | rs741702   | 12885250 | MCV  | 0 | 49482  | 1.7E-17 | 0 | 0 |
| 19q13 | rs3892630  | 37873324 | MCV  | 1 | 104479 | 1.0E-10 | 1 | 1 |
| 20q13 | rs737092   | 55423811 | MCV  | 0 | 35156  | 4.0E-13 | 1 | 0 |
| 20q13 | rs737092   | 55423811 | MCH  | 0 | 32108  | 6.4E-11 | 0 | 1 |
| 20q13 | rs737092   | 55423811 | RBC  | 0 | 33925  | 9.9E-09 | 0 | 1 |
| 21q22 | rs2032314  | 34276393 | PCV  | 1 | 111306 | 7.5E-10 | 1 | 1 |
| 21q22 | rs11910015 | 34260508 | HB   | 1 | 96063  | 7.2E-12 | 0 | 1 |
| 22q11 | rs5754217  | 20269675 | MCV  | 0 | 53759  | 8.6E-10 | 1 | 0 |
| 22q12 | rs5749446  | 31210585 | MCH  | 0 | 51609  | 3.3E-13 | 1 | 1 |
| 22q12 | rs5749446  | 31210585 | MCV  | 0 | 58012  | 4.0E-11 | 0 | 0 |
| 22q12 | rs855791   | 35792882 | MCH  | 0 | 38547  | 1.0E-69 | 1 | 0 |
| 22q12 | rs855791   | 35792882 | MCV  | 0 | 43197  | 2.4E-54 | 0 | 0 |
| 22q12 | rs855791   | 35792882 | HB   | 0 | 46184  | 4.7E-40 | 0 | 0 |
| 22q12 | rs855791   | 35792882 | PCV  | 0 | 44036  | 4.3E-20 | 0 | 0 |
| 22q12 | rs855791   | 35792882 | MCHC | 0 | 41609  | 3.1E-17 | 0 | 0 |
| 22q13 | rs140522   | 49318132 | MCV  | 0 | 44680  | 4.5E-23 | 1 | 1 |
| 22q13 | rs140522   | 49318132 | MCH  | 0 | 38308  | 8.0E-21 | 0 | 0 |
| 22q13 | rs140522   | 49318132 | RBC  | 0 | 39904  | 3.5E-09 | 0 | 1 |

---

**Supplementary Table 8.** Potential secondary SNPs with independent effects on phenotype at the genomic region associated with red blood cell phenotypes. For each genomic region, the SNP most closely associated with phenotype in the discovery GWAS is listed (lead SNP) along with the identity and association test results for SNPs showing independent association with phenotype in conditional analysis.

| Region | Phenotype | GWAS Lead SNP | GWAS P   | Position  | SNPs at P<10 <sup>-8</sup> in conditional analysis                                                                                                                                                |
|--------|-----------|---------------|----------|-----------|---------------------------------------------------------------------------------------------------------------------------------------------------------------------------------------------------|
| 3q29   | MCH       | rs11717368    | 6.6E-19  | 197318754 | rs11717368 (1.9E-15; <i>TFRC</i> <sup>n</sup> ), rs4916478 (1.8E-10; <i>TFRC</i> <sup>e</sup> , <i>ZDHHC19</i> <sup>n</sup> )                                                                     |
|        | MCV       | rs11717368    | 2.0E-14  | 197318754 | rs4916478 (2.9E-13; <i>TFRC</i> <sup>e</sup> , <i>ZDHHC19</i> <sup>n</sup> ), rs3804139 (1.6E-12; <i>TFRC</i> <sup>nc</sup> )                                                                     |
| 4q11   | RBC       | rs218238      | 2.8E-39  | 55089781  | rs218238 (1.1E-43; <i>KIT</i> <sup>n</sup> ), rs6824783 (3.9E-09; <i>KIT</i> <sup>n</sup> )                                                                                                       |
| 6p21   | HB        | rs198846      | 1.4E-30  | 26215442  | rs198846 (4.5E-34; <i>HFE</i> <sup>c</sup> , <i>HIST1H1T</i> <sup>n</sup> ), rs1408272 (2.6E-20; <i>HFE</i> <sup>c</sup> , <i>SLC17A3</i> <sup>n</sup> )                                          |
|        | MCH       | rs1408272     | 4.8E-67  | 25950930  | rs198846 (1.6E-72; <i>HFE</i> <sup>c</sup> , <i>HIST1H1T</i> <sup>n</sup> ), rs1408272 (6.7E-72; <i>HFE</i> <sup>c</sup> , <i>SLC17A3</i> <sup>n</sup> )                                          |
|        | MCV       | rs1408272     | 3.2E-47  | 25950930  | rs198846 (2.9E-50; <i>HFE</i> <sup>c</sup> , <i>HIST1H1T</i> <sup>n</sup> ), rs1408272 (2.1E-49; <i>HFE</i> <sup>c</sup> , <i>SLC17A3</i> <sup>n</sup> )                                          |
| 6p21   | MCH       | rs11968166    | 9.4E-34  | 42033282  | rs11970772 (2.1E-47; <i>CCND3</i> <sup>n</sup> ), rs6934551 (2.0E-19; <i>CCND3</i> <sup>n</sup> )                                                                                                 |
|        | MCV       | rs9349204     | 2.4E-40  | 42022356  | rs9349204 (3.6E-55; <i>CCND3</i> <sup>n</sup> ), rs2479720 (2.2E-23; <i>CCND3</i> <sup>n</sup> )                                                                                                  |
| 6q23   | MCH       | rs7776054     | 6.6E-108 | 135460609 | rs7776054 (3.8E-77; <i>HBS1L</i> <sup>n</sup> ), rs2210366 (1.4E-13; <i>HBS1L</i> <sup>n</sup> )                                                                                                  |
|        | MCV       | rs9389269     | 2.6E-109 | 135468852 | rs9389269 (2.2E-73; <i>HBS1L</i> <sup>n</sup> ), rs2210366 (1.8E-13; <i>HBS1L</i> <sup>n</sup> )                                                                                                  |
|        | RBC       | rs9373124     | 5.1E-97  | 135464902 | rs9373124 (6.0E-48; <i>HBS1L</i> <sup>n</sup> ), rs1411919 (4.6E-30; <i>HBS1L</i> <sup>n</sup> ), rs1320962 (2.1E-22; <i>MYB</i> <sup>n</sup> ), rs10484494 (3.9E-14; <i>HBS1L</i> <sup>n</sup> ) |
| 9q34   | HB        | rs7853989     | 1.1E-17  | 135121413 | rs7853989 (7.0E-17; <i>ABO</i> <sup>n</sup> ), rs579459 (1.9E-14; <i>ABO</i> <sup>n</sup> )                                                                                                       |
|        | RBC       | rs579459      | 9.3E-18  | 135143989 | rs579459 (2.9E-17; <i>ABO</i> <sup>n</sup> ), rs8176725 (1.2E-12; <i>ABO</i> <sup>n</sup> )                                                                                                       |
| 10q11  | MCH       | rs901683      | 1.8E-12  | 45286428  | rs901683 (1.9E-10; <i>MARCH8</i> <sup>n<sup>ce</sup></sup> ), rs7909074 (1.6E-09; <i>RASSF4</i> <sup>n</sup> )                                                                                    |
|        | MCV       | rs901683      | 1.5E-16  | 45286428  | rs901683 (1.4E-13; <i>MARCH8</i> <sup>n<sup>ce</sup></sup> ), rs7909074 (4.7E-13; <i>RASSF4</i> <sup>n</sup> )                                                                                    |
| 16p11  | MCH       | rs11248850    | 6.3E-23  | 103598    | rs11248850 (8.8E-17; <i>NPRL3</i> <sup>n</sup> ), rs11248914 (8.4E-13; <i>HBM</i> <sup>e</sup> , <i>ITFG3</i> <sup>n<sup>e</sup></sup> ), rs17525396 (1.3E-12; <i>NPRL3</i> <sup>n</sup> )        |



**Supplementary Table 9.** Coding SNPs in transcribed genes in LD at  $r^2 > 0.8$  (1000G EUR) with sentinel SNPs identified in the red blood cell phenotype genome-wide association study. Results are shown for the sentinel SNPs at each region, and also for secondary SNPs identified through conditional analysis (Supplementary Table 7). AF is frequency of allele A1 in the EUR population. Effect is per unit copy of allele A1, where available.  $P_{\text{pheno}}$  is for the association of coding SNP with phenotype;  $P_{\text{hetero}}$  is for comparison of effect size on phenotype between sentinel SNP and coding SNP;  $r^2$  is LD between sentinel and coding SNP.

| Region               | GWAS SNP   | Pheno | Coding SNP  | Pos       | Alleles (A1/A2) | $r^2$ | AF   | Effect        | N     | $P_{\text{pheno}}$ | $P_{\text{hetero}}$ | Gene     | Amino Acid change | Protein Position |
|----------------------|------------|-------|-------------|-----------|-----------------|-------|------|---------------|-------|--------------------|---------------------|----------|-------------------|------------------|
| <i>Sentinel SNPs</i> |            |       |             |           |                 |       |      |               |       |                    |                     |          |                   |                  |
| 1q23                 | rs857684   | MCHC  | rs41273491  | 156783766 | C/T             | 0.81  | 0.25 | NA            | NA    | NA                 | NA                  | OR6Y1    | VAL,ILE           | 252              |
| 1q23                 | rs857684   | MCHC  | rs857685    | 156843733 | A/C             | 1.00  | 0.27 | 0.018 (0.004) | 56209 | 5.60E-16           | 1.00                | OR10Z1   | ASN,THR           | 294              |
| 1q23                 | rs857684   | MCHC  | rs857725    | 156874559 | T/G             | 0.95  | 0.28 | 0.014 (0.004) | 52085 | 1.60E-13           | 0.51                | SPTA1    | LYS,GLN           | 1693             |
| 1q44                 | rs3811444  | RBC   | rs3811444   | 246106074 | C/T             | 1.00  | 0.33 | 0.018 (0.003) | 34323 | 4.50E-10           | 1.00                | TRIM58   | THR,MET           | 374              |
| 6p21                 | rs1408272  | MCH   | rs1800562   | 26201120  | G/A             | 0.82  | 0.05 | 0.425 (0.028) | 29711 | 6.50E-56           | 0.92                | HFE      | CYS,TYR           | 282              |
| 6p21                 | rs9272219  | RBC   | rs1142323   | 32717170  | A/G             | 0.84  | 0.28 | NA            | NA    | NA                 | NA                  | HLA-DQA1 | GLU,GLY           | 63               |
| 10q11                | rs901683   | MCV   | rs3764990   | 45276834  | G/A             | 1.00  | 0.08 | 0.350 (0.050) | 57857 | 1.20E-15           | 0.84                | MARCH8   | PRO,SER           | 92               |
| 11q13                | rs2302264  | MCV   | rs4930427   | 66957395  | C/T             | 0.99  | 0.44 | 0.104 (0.029) | 45955 | 6.75E-06           | 0.35                | RPS6KB2  | PHE,LEU           | 269              |
| 11q13                | rs2302264  | MCV   | rs13859     | 66958732  | C/T             | 0.99  | 0.44 | NA            | NA    | NA                 | NA                  | RPS6KB2  | ALA,VAL           | 420              |
| 11q13                | rs7125949  | HB    | rs3741151   | 72698494  | G/T             | 0.83  | 0.1  | NA            | NA    | NA                 | NA                  | ARHGEF17 | ARG,LEU           | 388              |
| 12q24                | rs3184504  | HB    | rs3184504   | 110368991 | T/C             | 1.00  | 0.53 | 0.051 (0.006) | 56784 | 4.30E-19           | 1.00                | SH2B3    | TRP,ARG           | 262              |
| 12q24                | rs3829290  | MCV   | rs555404    | 119660367 | T/C             | 0.99  | 0.47 | NA            | NA    | NA                 | NA                  | ACADS    | LEU,PRO           | 202              |
| 16q22                | rs2271294  | RBC   | rs1134760   | 66521704  | T/C             | 0.95  | 0.18 | 0.011 (0.006) | 11607 | 7.50E-02           | 0.38                | CTRL     | HIS,ARG           | 173              |
| 16q22                | rs2271294  | RBC   | rs20549     | 66527431  | A/G             | 0.95  | 0.18 | 0.016 (0.003) | 53376 | 3.90E-09           | 0.88                | PSMB10   | LEU,ILE           | 107              |
| 17q21                | rs12150672 | RBC   | rs114107890 | 41074926  | A/G             | 0.99  | 0.23 | NA            | NA    | NA                 | NA                  | C17orf69 | TYR,CYS           | 132              |
| 17q21                | rs12150672 | RBC   | rs16940681  | 41267940  | G/C             | 1.00  | 0.23 | NA            | NA    | NA                 | NA                  | CRHR1    | GLU,GLN           | 280              |
| 17q21                | rs12150672 | RBC   | rs62621252  | 41278722  | T/C             | 1.00  | 0.23 | NA            | NA    | NA                 | NA                  | SPPL2C   | SER,PRO           | 224              |
| 17q21                | rs12150672 | RBC   | rs62054815  | 41279046  | G/A             | 1.00  | 0.23 | NA            | NA    | NA                 | NA                  | SPPL2C   | ALA,THR           | 332              |
| 17q21                | rs12150672 | RBC   | rs12185233  | 41279434  | G/C             | 1.00  | 0.23 | 0.015 (0.003) | 53406 | 1.50E-09           | 0.53                | SPPL2C   | ARG,PRO           | 461              |
| 17q21                | rs12150672 | RBC   | rs12185268  | 41279463  | A/G             | 1.00  | 0.23 | 0.015 (0.003) | 42181 | 5.00E-08           | 0.51                | SPPL2C   | ILE,VAL           | 471              |
| 17q21                | rs12150672 | RBC   | rs12373123  | 41279853  | T/C             | 1.00  | 0.23 | 0.016 (0.003) | 45376 | 6.70E-09           | 0.73                | SPPL2C   | SER,PRO           | 601              |
| 17q21                | rs12150672 | RBC   | rs12373139  | 41279910  | G/A             | 1.00  | 0.23 | 0.014 (0.003) | 42186 | 2.40E-07           | 0.40                | SPPL2C   | GLY,ARG           | 620              |
| 17q21                | rs12150672 | RBC   | rs12373142  | 41279980  | C/G             | 0.99  | 0.23 | 0.016 (0.003) | 53406 | 3.80E-10           | 0.62                | SPPL2C   | PRO,ARG           | 643              |
| 17q21                | rs12150672 | RBC   | rs63750417  | 41416612  | C/T             | 1.00  | 0.23 | NA            | NA    | NA                 | NA                  | MAPT     | PRO,LEU           | 202              |
| 17q21                | rs12150672 | RBC   | rs62063786  | 41416860  | G/A             | 1.00  | 0.23 | NA            | NA    | NA                 | NA                  | MAPT     | ASP,ASN           | 285              |

|       |            |     |             |          |     |      |      |               |       |          |      |                 |         |      |
|-------|------------|-----|-------------|----------|-----|------|------|---------------|-------|----------|------|-----------------|---------|------|
| 17q21 | rs12150672 | RBC | rs62063787  | 41416873 | T/C | 1.00 | 0.23 | NA            | NA    | NA       | NA   | <i>MAPT</i>     | VAL,ALA | 289  |
| 17q21 | rs12150672 | RBC | rs17651549  | 41417115 | C/T | 1.00 | 0.23 | 0.016 (0.003) | 53394 | 2.70E-10 | 0.66 | <i>MAPT</i>     | ARG,TRP | 370  |
| 17q21 | rs12150672 | RBC | rs10445337  | 41423237 | T/C | 1.00 | 0.23 | 0.016 (0.003) | 45375 | 1.10E-08 | 0.68 | <i>MAPT</i>     | SER,PRO | 447  |
| 17q21 | rs12150672 | RBC | rs116444268 | 41429810 | T/C | 1.00 | 0.23 | NA            | NA    | NA       | NA   | <i>MAPT</i>     | ASN,LYS | 197  |
| 17q21 | rs12150672 | RBC | rs62063857  | 41432502 | A/G | 1.00 | 0.23 | NA            | NA    | NA       | NA   | <i>MAPT,STH</i> | GLN,ARG | 7    |
| 17q21 | rs12150672 | RBC | rs34579536  | 41464753 | A/G | 1.00 | 0.23 | NA            | NA    | NA       | NA   | <i>KANSL1</i>   | ILE,THR | 1085 |
| 17q21 | rs12150672 | RBC | rs34043286  | 41472966 | A/G | 1.00 | 0.23 | NA            | NA    | NA       | NA   | <i>KANSL1</i>   | SER,PRO | 718  |
| 19p13 | rs732716   | MCV | rs1127888   | 4405083  | C/T | 0.83 | 0.25 | NA            | NA    | NA       | NA   | <i>UBXD1</i>    | ALA,THR | 31   |
| 19q13 | rs3892630  | MCV | rs8108621   | 37875131 | G/A | 0.99 | 0.2  | NA            | NA    | NA       | NA   | <i>NUDT19</i>   | ARG,GLN | 142  |
| 22q11 | rs5754217  | MCV | rs2298428   | 20312892 | C/T | 0.89 | 0.18 | 0.172 (0.033) | 48734 | 2.50E-07 | 0.62 | <i>YDJC</i>     | ALA,THR | 263  |
| 22q12 | rs5749446  | MCH | rs111107    | 31205190 | G/A | 1.00 | 0.39 | 0.055 (0.017) | 15759 | 5.60E-04 | 0.46 | <i>FBXO7</i>    | MET,ILE | 36   |
| 22q12 | rs855791   | MCH | rs855791    | 35792882 | A/G | 1.00 | 0.6  | 0.193 (0.011) | 38547 | 1.00E-69 | 1.00 | <i>TMPRSS6</i>  | VAL,ALA | 736  |

Secondary SNPs

|      |           |     |           |           |     |      |      |               |       |          |      |             |         |     |
|------|-----------|-----|-----------|-----------|-----|------|------|---------------|-------|----------|------|-------------|---------|-----|
| 3q29 | rs3804139 | MCH | rs3817672 | 197285208 | C/T | 0.84 | 0.55 | 0.061 (0.011) | 42699 | 5.81E-10 | 0.15 | <i>TFRC</i> | GLY,SER | 142 |
| 6p21 | rs198846  | MCH | rs1799945 | 26199158  | C/G | 0.96 | 0.15 | 0.217 (0.015) | 43454 | 4.01E-47 | 0.49 | <i>HFE</i>  | HIS,ASP | 63  |

**Supplementary Table 10.** Relationship between sentinel SNPs from the GWAS with expression of cis genes ( $\pm 1\text{MB}$ ) in peripheral blood lymphocytes from i. 206 families of European descent (eQTL1)<sup>50</sup>; and ii. 1,469 unrelated individuals from the UK and Netherlands (eQTL2)<sup>51</sup>. Genes identified as eQTLs based on:  $P < 1 \times 10^{-5}$  for association of sentinel SNP with transcript expression (Tx P1) and  $r^2 > 0.8$  between Sentinel SNP and Transcript SNP (the SNP most closely associated with transcript). Tx P2: association of Transcript SNP with expression; LD between sentinel and peak SNPs ( $r^2$ ) calculated from HapMap CEU population.

| Chr | Band  | Sentinel SNP | Position1 | Primary Pheno | Gene                       | Tx P1    | Transcript SNP | Position2 | Distance | Tx P2    | $r^2$ | Dataset |
|-----|-------|--------------|-----------|---------------|----------------------------|----------|----------------|-----------|----------|----------|-------|---------|
| 4   | 4q27  | rs13152701   | 122970511 | MCV           | <i>CCNA2</i>               | 5.9E-13  | rs4833236      | 122995517 | 25006    | 5.4E-13  | 1.00  | eQTL1   |
| 6   | 6p23  | rs6914805    | 16389166  | MCH           | <i>GMPR</i>                | 3.1E-09  | rs9396658      | 16360832  | -28334   | 2.2E-09  | 1.00  | eQTL2   |
| 6   | 6p21  | rs9272219    | 32710247  | RBC           | <i>HLA-DQA1 / HLA-DQA2</i> | 3.2E-134 | rs9272219      | 32710247  | 0        | 3.2E-134 | 1.00  | eQTL2   |
| 8   | 8p11  | rs6987853    | 42576607  | MCHC          | <i>C8orf40</i>             | 3.7E-30  | rs2974354      | 42533100  | -43507   | 5.6E-34  | 0.80  | eQTL1   |
| 8   | 8p11  | rs6987853    | 42576607  | MCHC          | <i>C8orf40</i>             | 3.7E-41  | rs2923427      | 42504905  | -71702   | 1.1E-43  | 0.89  | eQTL2   |
| 10  | 10q11 | rs901683     | 45286428  | MCV           | <i>MARCH8</i>              | 6.2E-07  | rs2288619      | 45259824  | -26604   | 2.9E-07  | 1.00  | eQTL2   |
| 11  | 11p15 | rs11042125   | 8894625   | HB            | <i>AKIP1 / C11orf16</i>    | 1.2E-43  | rs10840147     | 8877280   | -17345   | 5.8E-46  | 0.83  | eQTL2   |
| 11  | 11p15 | rs11042125   | 8894625   | HB            | <i>NRIP3</i>               | 3.2E-06  | rs10840147     | 8877280   | -17345   | 1.3E-06  | 0.83  | eQTL2   |
| 11  | 11q13 | rs2302264    | 66964002  | MCV           | <i>RPS6KB2</i>             | 2.5E-17  | rs1638588      | 66956282  | -7720    | 2.5E-17  | 1.00  | eQTL2   |
| 11  | 11q13 | rs2302264    | 66964002  | MCV           | <i>PTPRCAP, CORO1B</i>     | 2.6E-19  | rs7114510      | 66981170  | 17168    | 7.0E-20  | 0.94  | eQTL2   |
| 11  | 11q13 | rs7125949    | 72686732  | HB            | <i>ARHGEF17</i>            | 4.5E-14  | rs1002127      | 72781483  | 94751    | 1.3E-14  | 0.94  | eQTL2   |
| 15  | 15q22 | rs2572207    | 63857747  | MCV           | <i>PTPLAD1</i>             | 8.6E-17  | rs688223       | 63518793  | -338954  | 1.6E-17  | 0.90  | eQTL1   |
| 15  | 15q25 | rs2867932    | 76378092  | MCHC          | <i>DNAJA4</i>              | 1.5E-08  | rs2867932      | 76378092  | 0        | 1.5E-08  | 1.00  | eQTL1   |
| 16  | 16q22 | rs2271294    | 66459827  | RBC           | <i>DUS2L</i>               | 4.2E-46  | rs6499157      | 66662975  | 203148   | 1.5E-59  | 0.80  | eQTL2   |
| 17  | 17q11 | rs2070265    | 24099550  | MCH           | <i>ERAL1</i>               | 3.2E-10  | rs2242345      | 24209953  | 110403   | 6.8E-11  | 1.00  | eQTL2   |
| 17  | 17q11 | rs2070265    | 24099550  | MCH           | <i>TRAF4</i>               | 1.3E-15  | rs2242345      | 24209953  | 110403   | 2.2E-16  | 1.00  | eQTL1   |
| 17  | 17q12 | rs8182252    | 34981476  | RBC           | <i>CDK12</i>               | 2.6E-09  | rs6503513      | 34815139  | -166337  | 8.7E-11  | 1.00  | eQTL1   |
| 17  | 17q12 | rs12150672   | 41182408  | RBC           | <i>C17orf69</i>            | 4.5E-49  | rs413844       | 41085167  | -97241   | 7.9E-50  | 0.96  | eQTL2   |
| 17  | 17q12 | rs12150672   | 41182408  | RBC           | <i>ARHGAP27</i>            | 7.2E-11  | rs10514879     | 41158754  | -23654   | 2.9E-11  | 0.95  | eQTL1   |
| 17  | 17q12 | rs12150672   | 41182408  | RBC           | <i>ARL17B</i>              | 2.4E-20  | rs199443       | 42174733  | 992325   | 6.0E-24  | 0.94  | eQTL1   |
| 17  | 17q25 | rs4969184    | 73905008  | HB            | <i>PGS1</i>                | 5.0E-10  | rs4969183      | 73904967  | -41      | 5.0E-10  | 1.00  | eQTL1   |
| 18  | 18q21 | rs4890633    | 42087276  | MCH           | <i>C18orf25</i>            | 1.5E-12  | rs4574015      | 42056124  | -31152   | 1.2E-12  | 0.96  | eQTL1   |
| 19  | 19p13 | rs741702     | 12885250  | MCH           | <i>CALR</i>                | 4.7E-10  | rs2242517      | 12863563  | -21687   | 9.8E-11  | 0.81  | eQTL1   |
| 19  | 19p13 | rs741702     | 12885250  | MCH           | <i>FARSA</i>               | 4.6E-10  | rs2293683      | 12900284  | 15034    | 3.1E-10  | 1.00  | eQTL1   |
| 22  | 22q11 | rs5754217    | 20269674  | MCV           | <i>UBE2L3</i>              | 1.5E-23  | rs5754217      | 20269674  | 0        | 1.5E-23  | 1.00  | eQTL1   |
| 22  | 22q13 | rs140522     | 49318132  | MCV           | <i>ECGF1</i>               | 1.3E-133 | rs140522       | 49318132  | 0        | 1.3E-133 | 1.00  | eQTL2   |
| 22  | 22q13 | rs140522     | 49318132  | MCV           | <i>ECGF1</i>               | 3.0E-12  | rs140522       | 49318132  | 0        | 3.0E-12  | 1.00  | eQTL1   |

**Supplementary Table 11.** Candidate genes identified by GRAIL using Pubmed 2006 or 2011 datasets. P values are corrected for multiple testing.

| Region | SNP        | Position  | GRAIL 2006      |         | GRAIL 2011       |         |
|--------|------------|-----------|-----------------|---------|------------------|---------|
|        |            |           | Gene            | P       | Gene             | P       |
| 1p36   | rs1175550  | 3681388   | <i>KIAA0562</i> | 9.4E-01 | <i>LRRC47</i>    | 2.0E-01 |
| 1p34   | rs3916164  | 39842526  | <i>BMP8A</i>    | 9.3E-01 | <i>LOC728448</i> | 5.4E-01 |
| 1p32   | rs741959   | 47448820  | <i>TAL1*</i>    | 1.1E-02 | <i>TAL1</i>      | 6.5E-02 |
| 1q23   | rs857684   | 156842353 | <i>SPTA1*</i>   | 2.4E-02 | <i>SPTA1*</i>    | 1.5E-02 |
| 1q32   | rs7529925  | 197273831 | <i>PTPRC</i>    | 1.3E-01 | <i>PTPRC</i>     | 1.8E-01 |
| 1q32   | rs7551442  | 201921744 | <i>ATP2B4</i>   | 1.0E-01 | <i>ATP2B4</i>    | 4.4E-02 |
| 1q32   | rs9660992  | 203516073 | <i>NUAK2</i>    | 6.5E-01 | <i>RBBP5</i>     | 3.4E-01 |
| 1q44   | rs3811444  | 246106074 | <i>TRIM58</i>   | 1.0E+00 | <i>TRIM58</i>    | 9.6E-01 |
| 2p21   | rs4953318  | 46208555  | <i>PRKCE</i>    | 4.5E-01 | <i>PRKCE</i>     | 3.2E-01 |
| 2p16   | rs243070   | 60473790  | <i>BCL11A</i>   | 6.0E-01 | <i>BCL11A</i>    | 5.5E-02 |
| 2q13   | rs10207392 | 111566130 | <i>ACOXL</i>    | 2.2E-01 | <i>ACOXL</i>     | 1.9E-01 |
| 3p24   | rs9310736  | 24325815  | <i>THRB</i>     | 1.4E-01 | <i>THRB</i>      | 4.1E-01 |
| 3q22   | rs6776003  | 142749183 | <i>ZBTB38</i>   | 8.1E-01 | <i>ZBTB38</i>    | 9.5E-01 |
| 3q23   | rs13061823 | 143603476 | <i>TRPC1</i>    | 6.2E-02 | <i>TRPC1</i>     | 8.4E-02 |
| 3q29   | rs11717368 | 197318754 | <i>TFRC*</i>    | 3.6E-02 | <i>TFRC*</i>     | 1.2E-02 |
| 4q11   | rs218238   | 55089781  | <i>KIT</i>      | 1.7E-01 | <i>KIT</i>       | 5.1E-01 |
| 4q27   | rs13152701 | 122970511 | <i>TRPC3</i>    | 7.9E-02 | <i>TRPC3</i>     | 7.3E-02 |
| 6p23   | rs6914805  | 16389166  | <i>GMPR</i>     | 5.7E-01 | <i>GMPR</i>      | 1.5E-01 |
| 6p21   | rs1408272  | 25950930  | <i>HFE</i>      | 1.1E-01 | <i>HFE*</i>      | 5.2E-03 |
| 6p22   | rs13219787 | 27969649  | <i>HIST1H1B</i> | 9.9E-01 | <i>HIST1H3H</i>  | 9.2E-01 |
| 6p22   | rs2097775  | 30462282  | <i>RPP21</i>    | 9.6E-01 | <i>RPP21</i>     | 5.2E-01 |
| 6p21   | rs9272219  | 32710247  | <i>HLA-DQA1</i> | 9.9E-01 | <i>HLA-DQA1</i>  | 9.3E-01 |
| 6p21   | rs9349204  | 42022356  | <i>CCND3*</i>   | 3.0E-02 | <i>CCND3</i>     | 8.1E-02 |
| 6p12   | rs9369427  | 43919408  | <i>VEGFA</i>    | 6.4E-01 | <i>GTPBP2</i>    | 8.9E-01 |
| 6q21   | rs1008084  | 109733658 | <i>CD164</i>    | 7.7E-01 | <i>ARMC2</i>     | 8.8E-01 |
| 6q23   | rs9389269  | 135468852 | <i>MYB</i>      | 1.4E-01 | <i>HBS1L</i>     | 2.6E-01 |
| 6q24   | rs590856   | 139886122 | <i>TXLNB</i>    | 8.4E-01 | <i>TXLNB</i>     | 8.1E-01 |
| 6q26   | rs736661   | 164402826 | N/A             | N/A     | N/A              | N/A     |
| 7p13   | rs12718598 | 50395939  | <i>IKZF1*</i>   | 1.8E-02 | <i>IKZF1</i>     | 7.6E-02 |
| 7q22   | rs2075672  | 100078232 | <i>TFR2</i>     | 1.2E-01 | <i>TFR2*</i>     | 9.7E-03 |
| 7q36   | rs10480300 | 151036938 | <i>PRKAG2</i>   | 5.7E-02 | <i>PRKAG2</i>    | 3.7E-02 |
| 8p11   | rs4737009  | 41749562  | <i>ANK1*</i>    | 2.2E-02 | <i>ANK1*</i>     | 2.7E-02 |
| 8p11   | rs6987853  | 42576607  | <i>VDAC3</i>    | 3.0E-01 | <i>SLC20A2</i>   | 2.7E-01 |
| 9p24   | rs2236496  | 4834265   | <i>RCL1</i>     | 8.4E-01 | <i>RCL1</i>      | 9.0E-01 |
| 9q34   | rs579459   | 135143989 | <i>ABO</i>      | 3.1E-01 | <i>ABO</i>       | 2.1E-01 |
| 10q11  | rs901683   | 45286428  | <i>ANXA8</i>    | 7.5E-01 | <i>AGAP4</i>     | 3.1E-04 |
| 10q22  | rs10159477 | 70769894  | <i>HK1</i>      | 6.8E-02 | <i>HK1*</i>      | 1.1E-02 |
| 10q24  | rs11190134 | 101272190 | <i>NKX2-3</i>   | 5.5E-01 | <i>NKX2-3</i>    | 9.7E-01 |
| 11p15  | rs11042125 | 8894625   | <i>AKIP1</i>    | 9.2E-01 | <i>AKIP1</i>     | 9.1E-01 |
| 11p15  | rs7936461  | 9997462   | <i>ADM</i>      | 2.5E-01 | <i>ADM</i>       | 2.2E-01 |
| 11q13  | rs2302264  | 66964002  | <i>CABP4</i>    | 1.3E-01 | <i>CABP4</i>     | 1.4E-01 |
| 11q13  | rs7125949  | 72686732  | <i>P2RY6</i>    | 8.2E-01 | <i>P2RY6</i>     | 8.5E-01 |

|       |            |           |                  |         |                  |         |
|-------|------------|-----------|------------------|---------|------------------|---------|
| 12p13 | rs7312105  | 2393616   | <i>CACNA1C</i>   | 2.1E-01 | <i>CACNA1C</i>   | 1.5E-01 |
| 12p13 | rs10849023 | 4202739   | <i>CCND2*</i>    | 1.2E-02 | <i>CCND2*</i>    | 3.4E-02 |
| 12q22 | rs11104870 | 87353425  | <i>TMTC3</i>     | 8.0E-01 | <i>TMTC3</i>     | 6.0E-01 |
| 12q24 | rs3184504  | 110368991 | <i>SH2B3</i>     | 1.7E-01 | <i>SH2B3</i>     | 2.6E-01 |
| 12q24 | rs3829290  | 119610821 | <i>ACADS</i>     | 2.6E-01 | <i>ACADS</i>     | 1.0E-01 |
| 14q23 | rs7155454  | 64571992  | <i>RAB15</i>     | 3.4E-01 | <i>FNTB</i>      | 2.7E-01 |
| 14q24 | rs11627546 | 69435677  | <i>SMOC1</i>     | 5.1E-01 | <i>SMOC1</i>     | 8.2E-01 |
| 14q32 | rs17616316 | 102892515 | <i>CKB</i>       | 1.3E-01 | <i>CKB</i>       | 1.1E-01 |
| 15q21 | rs1532085  | 56470658  | <i>LIPC</i>      | 8.2E-01 | <i>LIPC</i>      | 7.6E-01 |
| 15q22 | rs2572207  | 63857747  | <i>SLC24A1</i>   | 4.7E-01 | <i>SLC24A1</i>   | 6.3E-01 |
| 15q24 | rs8028632  | 73108315  | <i>RPP25</i>     | 8.6E-01 | <i>RPP25</i>     | 5.7E-02 |
| 15q24 | rs11072566 | 74081026  | <i>NRG4</i>      | 4.2E-01 | <i>NRG4</i>      | 3.5E-01 |
| 15q25 | rs2867932  | 76378092  | <i>ACSBG1</i>    | 5.5E-01 | <i>ACSBG1</i>    | 6.4E-01 |
| 16p11 | rs11248850 | 103598    | <i>HBA1</i>      | 3.2E-01 | <i>HBA1*</i>     | 7.2E-04 |
| 16q22 | rs2271294  | 66459827  | <i>SLC9A5</i>    | 4.5E-01 | <i>CBFB</i>      | 9.0E-01 |
| 16q24 | rs10445033 | 87367963  | <i>ZFPM1</i>     | 4.2E-01 | <i>MVD</i>       | 1.3E-01 |
| 17p11 | rs888424   | 19926019  | <i>LOC284194</i> | 9.9E-01 | <i>AKAP10</i>    | 9.8E-01 |
| 17q11 | rs2070265  | 24099550  | <i>PROCA1</i>    | 2.8E-01 | <i>PROCA1</i>    | 6.3E-01 |
| 17q12 | rs8182252  | 34981476  | <i>IKZF3</i>     | 1.0E-01 | <i>IKZF3</i>     | 5.3E-01 |
| 17q21 | rs2269906  | 39649863  | <i>SLC4A1*</i>   | 4.0E-02 | <i>SLC4A1*</i>   | 9.0E-03 |
| 17q21 | rs12150672 | 41182408  | <i>CRHR1</i>     | 9.6E-01 | <i>KANSL1</i>    | 9.1E-01 |
| 17q25 | rs4969184  | 73905008  | <i>SOCS3</i>     | 3.2E-01 | <i>PGS1</i>      | 8.8E-02 |
| 18q21 | rs4890633  | 42087276  | <i>ATP5A1</i>    | 3.5E-01 | <i>ATP5A1</i>    | 2.9E-01 |
| 19p13 | rs2159213  | 2087102   | <i>DOT1L</i>     | 7.6E-01 | <i>PLEKHJ1</i>   | 3.1E-01 |
| 19p13 | rs732716   | 4317219   | <i>SH3GL1</i>    | 7.9E-01 | <i>CHAF1A</i>    | 8.8E-01 |
| 19p13 | rs741702   | 12885250  | <i>KLF1</i>      | 2.3E-01 | <i>KLF1</i>      | 2.0E-01 |
| 19q13 | rs3892630  | 37873324  | <i>RGS9BP</i>    | 8.6E-01 | <i>ANKRD27</i>   | 3.0E-01 |
| 20q13 | rs737092   | 55423811  | <i>PCK1</i>      | 9.6E-01 | <i>SPO11</i>     | 8.5E-01 |
| 21q22 | rs2032314  | 34276393  | <i>ATP5O</i>     | 2.8E-01 | <i>ATP5O</i>     | 1.2E-01 |
| 22q11 | rs5754217  | 20269675  | <i>HIC2</i>      | 1.0E+00 | <i>HIC2</i>      | 7.1E-01 |
| 22q12 | rs5749446  | 31210585  | <i>FBXO7</i>     | 1.3E-02 | <i>FBXO7</i>     | 3.4E-02 |
| 22q12 | rs855791   | 35792882  | <i>TMPRSS6</i>   | 8.1E-01 | <i>TMPRSS6</i>   | 1.9E-01 |
| 22q13 | rs140522   | 49318132  | <i>CPT1B</i>     | 7.7E-01 | <i>LOC440836</i> | 2.0E-01 |

**Supplementary Table 12.** Canonical pathways analysis using the Ingenuity Pathway Analysis tool (IPA, Ingenuity Systems, CA, USA). The IPA Knowledge Base was used to explore the functional relationship between proteins encoded by the 121 candidate genes identified at the 75 loci associated with red blood cell phenotypes. Genes were analysed for direct interactions only and networks were generated with a maximum size of 35 molecules.

| Candidate genes                                                                                                                                                                         | Additional genes                                                                                                                                                   | P                 | Top Functions                                                                                  |
|-----------------------------------------------------------------------------------------------------------------------------------------------------------------------------------------|--------------------------------------------------------------------------------------------------------------------------------------------------------------------|-------------------|------------------------------------------------------------------------------------------------|
| 26 genes: ANK1, ATP2B4, CACNA1C, CALR, CCND2, CCND3, CDK12, FBX07, HK1, HLAQA1, IKZF1, KIT, KITLG, MAPT, MAX, MPND, PRKCE, PTPRCAP, QKI, RPS6KB2, SH2B3, SLC4A1, SPTA1, STH, TAL1, THRB | Akt, Calmodulin, estrogen receptor, Histone h3, P38 MAPK, PI3K, PP2A, RNA polymerase II, Spectrin                                                                  | 10 <sup>-54</sup> | Hematological Disease, Cellular Development, Hematological System Development and Function     |
| 15 genes: CCNA2, CITED2, CRHR1, EDC4, HEYL, HIST1H2AG, HIST1H3A, KANSL1, NPRL3, NRIP3, P2RY6, RBM38, SCO2, SPECC1, VEGFA                                                                | CDK1, E2f, Gpcr, GPR55, GPR61, GPR84, GPR144, GPR173, GPR174, GPR176, GPR89A/GPR89B, GPR89C, GPRC6A, GRK5, LGR4, NR3C2, SMAD7, TAAR8, TP53, VN1R2                  | 10 <sup>-26</sup> | Developmental Disorder, Endocrine System Disorders, Cellular Growth and Proliferation          |
| 14 genes: BBS7, BCL11A, C18orf25, EIF5, FNTB, GMPR, HBS1L, NCAPH2, NEUROD2, NKX2-3, NUTF2, PPCDC, TMCC2, TRAF4,                                                                         | DBI, EBP, HNF4A, JUN, MEF2B, MEF2B, MITF, NR2F2, OSCAR, PMEL, POUF1, PXDN, TBC1D16, TCF4, TDRD7, TMC6, Tpsab1, Tsc22d3, UBE2I, VSX1, ZCCHC8, ZNF146                | 10 <sup>-24</sup> | Cellular Development, Embryonic Development, Amino Acid Metabolism                             |
| 13 genes: ACTL6B, ARHGAP27, ARHGEF17, CORO1B, ERAL1, LIPC, NRG4, ODF3B, PTPLAD1, SCAMP5, TMPRSS6, UBTF, XRN1                                                                            | AKT1, ARHGEF4, ARHGEF19, ARHGEF25, ERBB4, Erb4 dimer, ESR1, FN1, INPP5A, MYBPH, MYC, MYO9B, NDRG2, NRG3, OPHN1, PLEKHG2, PRKCA, RAC1, RHOA, RIBIN, SMARCA4, TMEM97 | 10 <sup>-22</sup> | Cell-To-Cell Signaling and Interaction, Cellular Assembly and Organization, Tissue Development |
| 13 genes: AKIP1, AP3D1, CTRL, DENND4A, HIST1H2BH/HIST1H2BO, SPPL2C, NEK8, PSMB10, SBF2, SH3GL1, TYMP, UBXN6, WDR61                                                                      | Asc2, ATP6AP2, BATF2, DAPK2, DEFB103A/DEFB103B, FIP1L1, FOS, GNL2, GSK3B, ILKAP, MDM2, NR5A2, PDLIM2, RELA, SNN, SOAT1, STAT1, TFGBR1, TREM1, YBX2, YWHAZ, ZNF133  | 10 <sup>-22</sup> | Cell Death, Infectious Disease, Gene Expression                                                |
| 11 genes: ACADS, ATP5O, ATXN2, DNAJA4, FARSA, KCTD17, MARCH8, mir-181, MLEC, ST5, UBE2L3                                                                                                | ATP5G1, ATP6AP1, ATP6V0E2, ATP6V1C1, ATP6V1D                                                                                                                       | 10 <sup>-17</sup> | Lipid Metabolism, Molecular Transport, Small Molecule Biochemistry                             |



**Supplementary Table 13.** Top biological functions of candidate genes using the IPA software tool.

| <b>Biological function</b>                           | <b>P-value</b> | <b>P-value (corrected)</b> | <b>Candidate genes (N)</b> |
|------------------------------------------------------|----------------|----------------------------|----------------------------|
| <i>Diseases and Disorders</i>                        |                |                            |                            |
| Hematological Disease                                | 4.99E-08       | 1.21E-02                   | 23                         |
| Developmental Disorder                               | 8.51E-07       | 1.21E-02                   | 23                         |
| Genetic Disorder                                     | 8.51E-07       | 1.21E-02                   | 23                         |
| Organismal Injury and Abnormalities                  | 8.51E-07       | 1.21E-02                   | 15                         |
| Metabolic Disease                                    | 8.51E-07       | 1.21E-02                   | 23                         |
| <i>Molecular and Cellular Functions</i>              |                |                            |                            |
| Cellular Development                                 | 1.20E-06       | 1.21E-02                   | 32                         |
| Cell Morphology                                      | 4.46E-06       | 1.15E-02                   | 25                         |
| Cellular Growth and Proliferation                    | 5.09E-06       | 1.21E-02                   | 29                         |
| Cellular Movement                                    | 2.49E-05       | 1.21E-02                   | 6                          |
| Cell Death                                           | 3.36E-05       | 1.21E-02                   | 19                         |
| <i>Physiological System Development and Function</i> |                |                            |                            |
| Hematological System Development and Function        | 1.41E-08       | 1.21E-02                   | 26                         |
| Hematopoiesis                                        | 1.41E-08       | 1.21E-02                   | 22                         |
| Lymphoid Tissue Structure and Development            | 5.09E-06       | 1.21E-02                   | 20                         |
| Tissue Morphology                                    | 6.70E-06       | 1.09E-02                   | 27                         |
| Immune Cell Trafficking                              | 2.49E-05       | 1.15E-03                   | 7                          |

**Supplementary Table 14.** Summary of known biology for the 121 candidate genes. Blood cell phenotypes in humans are highlighted (red).

| Region | SNP       | Gene            | Mouse homolog    | Mouse pheno | OMIM                                                                                         | Gene summary                                                                                                                                                                                                                                                                                                                                                                                                                                                                   |
|--------|-----------|-----------------|------------------|-------------|----------------------------------------------------------------------------------------------|--------------------------------------------------------------------------------------------------------------------------------------------------------------------------------------------------------------------------------------------------------------------------------------------------------------------------------------------------------------------------------------------------------------------------------------------------------------------------------|
| 1p36   | rs1175550 | <i>CCDC27</i>   | <i>Ccdc27</i>    |             |                                                                                              | Coiled-coil domain containing 27. Function unknown.                                                                                                                                                                                                                                                                                                                                                                                                                            |
| 1p36   | rs1175550 | <i>LRRC48</i>   | <i>Lrrc48</i>    |             |                                                                                              | Leucine rich repeat containing 48. Function unknown.                                                                                                                                                                                                                                                                                                                                                                                                                           |
| 1p34   | rs3916164 | <i>HEYL</i>     | <i>Heyl</i>      |             |                                                                                              | Hairy/enhancer-of-split related with YRPW motif-like. Encodes a basic helix-loop-helix-type transcription factor, thought to be involved in Notch signalling and a regulator of cell fate decisions <sup>52</sup> . HEYL may also influence androgen receptor function and be involved in prostate cancer pathogenesis <sup>53</sup> .                                                                                                                                         |
| 1p32   | rs741959  | <i>TAL1</i>     | <i>Tal1</i>      | Yes         | Leukemia-1, T-cell acute lymphocytic                                                         | T-cell acute lymphocytic leukemia 1. TAL1 is a basic loop helix transcriptional regulator with a key role in haematopoiesis. TAL1 is required for terminal differentiation and maturation of red blood cells <sup>54</sup> , and also involved in oncogenesis in the T-cell lineage <sup>55</sup> .                                                                                                                                                                            |
| 1q23   | rs857684  | <i>OR6Y1</i>    | <i>Olfrc220</i>  |             |                                                                                              | Olfactory receptor, family 6, subfamily Y, member 1. Encodes an olfactory receptor.                                                                                                                                                                                                                                                                                                                                                                                            |
| 1q23   | rs857684  | <i>OR10Z1</i>   | <i>Olfrc419</i>  |             |                                                                                              | Olfactory receptor, family 10, subfamily Z, member 1. Encodes an olfactory receptor.                                                                                                                                                                                                                                                                                                                                                                                           |
| 1q23   | rs857684  | <i>SPTA1</i>    | <i>Spna1</i>     | Yes         | Elliptocytosis-2 MIM:130600; Pyropoikilocytosis MIM:266140; Spherocytosis, type 3 MIM:270970 | Spectrin, alpha, erythrocytic 1. Spectrin is an actin cross linking and molecular scaffold protein that links the plasma membrane to the actin cytoskeleton, and functions in the determination of cell shape, arrangement of transmembrane proteins, and organization of organelles. Mutations in this gene result in a variety of hereditary red blood cell disorders <sup>56</sup> .                                                                                        |
| 1q32   | rs7529925 | <i>MIR181A1</i> | <i>Mir181a-1</i> |             |                                                                                              | MicroRNA 181a-1. A non-coding gene, which is involved in post-transcriptional regulation of gene expression. miR-181a regulates p27 mRNA translation during myeloid cell differentiation and may play a role in myelodysplastic syndromes <sup>57</sup> . miRNA-181a has also been implicated in non-haematological malignancies including thyroid papillary <sup>58</sup> , oral squamous cell <sup>59</sup> , malignant glioma <sup>60</sup> and lung cancer <sup>61</sup> . |
| 1q32   | rs7551442 | <i>ATP2B4</i>   | <i>Atp2b4</i>    |             |                                                                                              | ATPase, Ca++ transporting, plasma membrane 4. ATP2B4 belongs to the family of ion transport ATPases and plays a role in calcium homeostasis <sup>62</sup> . A role in red blood cell biology not described.                                                                                                                                                                                                                                                                    |
| 1q32   | rs9660992 | <i>TMCC2</i>    | <i>Tmcc2</i>     |             |                                                                                              | Transmembrane and coiled-coil domain family 2. TMCC2 is a transmembrane protein, reported to be involved in amyloid production underlying Alzheimers Disease <sup>63</sup> .                                                                                                                                                                                                                                                                                                   |
| 1q44   | rs3811444 | <i>TRIM58</i>   | <i>Trim58</i>    |             |                                                                                              | Tripartite motif containing 58. Encodes a gene of unknown function that is strongly expressed in bone marrow.                                                                                                                                                                                                                                                                                                                                                                  |
| 2p21   | rs4953318 | <i>PRKCE</i>    | <i>Prkce</i>     | Yes         |                                                                                              | Protein kinase C, epsilon. PRKCE is a protein kinase involved in calcium and second messenger signalling. PRKCE has been shown to be involved in many                                                                                                                                                                                                                                                                                                                          |

|      |            |               |               |     |                                                                                                                                                                                                                            |                                                                                                                                                                                                                                                                             |
|------|------------|---------------|---------------|-----|----------------------------------------------------------------------------------------------------------------------------------------------------------------------------------------------------------------------------|-----------------------------------------------------------------------------------------------------------------------------------------------------------------------------------------------------------------------------------------------------------------------------|
|      |            |               |               |     |                                                                                                                                                                                                                            | different cellular functions, including macrophage activation, apoptosis, cardioprotection from ischemia, heat shock response, as well as insulin exocytosis <sup>64</sup> .                                                                                                |
| 2p16 | rs243070   | <i>BCL11A</i> | <i>Bcl11a</i> | Yes |                                                                                                                                                                                                                            | B-cell CLL/lymphoma 11A. BCL11A encodes a zinc-finger protein involved in haematopoiesis. BCL11A influences HbF levels and disease severity in patients with beta-thalassemia <sup>65</sup> . Variants near BCL11A are also associated with type-2 diabetes <sup>66</sup> . |
| 2q13 | rs10207392 | <i>ACOXL</i>  | <i>Acox1</i>  |     |                                                                                                                                                                                                                            | Acyl-CoA oxidase-like. Function unknown.                                                                                                                                                                                                                                    |
| 3p24 | rs9310736  | <i>THRB</i>   | <i>Thrb</i>   | Yes | Thyroid hormone resistance MIM:188570; Thyroid hormone resistance, autosomal recessive MIM:274300; Thyroid hormone resistance, selective pituitary MIM:145650                                                              | Thyroid hormone receptor beta. THRB is a nuclear hormone receptor for triiodothyronine. Mutations in this gene are known to cause generalized thyroid hormone resistance <sup>67</sup> .                                                                                    |
| 3q22 | rs6776003  | <i>RASA2</i>  | <i>Rasa2</i>  |     |                                                                                                                                                                                                                            | RAS p21 protein activator 2. RASA2 is a GTPase-activating protein, which acts to suppress RAS function, thereby influencing cellular proliferation and differentiation <sup>68</sup> .                                                                                      |
| 3q23 | rs13061823 | <i>XRN1</i>   | <i>Xrn1</i>   |     |                                                                                                                                                                                                                            | 5'-3' exoribonuclease 1. XRN1 localizes to cytoplasmic foci containing a complex of mRNA-degrading enzymes. XRN1 has been implicated in homologous recombination, meiosis, telomere maintenance, and microtubule assembly <sup>69</sup> .                                   |
| 3q29 | rs11717368 | <i>TFRC</i>   | <i>Tfrc</i>   | Yes |                                                                                                                                                                                                                            | Transferrin receptor. TFRC is the key receptor for cellular uptake of iron, required for hemeoglobin synthesis <sup>70</sup> .                                                                                                                                              |
| 4q11 | rs218238   | <i>KIT</i>    | <i>Kit</i>    | Yes | Gastrointestinal stromal tumor, somatic MIM: 606764; Germ cell tumors MIM:273300; <b>Leukemia, acute myeloid MIM:601626; Mast cell leukemia; Mastocytosis with associated hematologic disorder</b> ; Piebaldism MIM:172800 | Kit proto-oncogene. KIT is a tyrosine kinase growth factor receptor expressed at high levels on haemopoietic stem cells and multipotent progenitor cells, which acts as a receptor for growth factors such as Stem Cell Factor <sup>71</sup> .                              |
| 4q27 | rs13152701 | <i>BBS7</i>   | <i>Bbs7</i>   |     | Bardet-Biedl syndrome 7 MIM:209900                                                                                                                                                                                         | Bardet-Biedl syndrome 7. BBS7 encodes one of seven proteins that form the BBSome complex which is involved in cilia formation and morphogenesis <sup>72</sup> .                                                                                                             |
| 4q27 | rs13152701 | <i>CCNA2</i>  | <i>Ccna2</i>  | Yes |                                                                                                                                                                                                                            | Cyclin A2. CCNA2 belongs to the highly conserved cyclin family, which function as regulators of CDK kinases, and may influence cell cycle transitions <sup>73</sup> .                                                                                                       |
| 6p23 | rs6914805  | <i>GMPR</i>   | <i>Gmpr</i>   |     |                                                                                                                                                                                                                            | Guanosine monophosphate reductase. GMPR encodes an enzyme that catalyzes conversion of guanosine monophosphate to inosine monophosphate, and which may be involved in the re-utilization of purine nucleosides <sup>74</sup> .                                              |
| 6p21 | rs1408272  | <i>HFE</i>    | <i>Hfe</i>    | Yes | <b>Hemochromatosis MIM:235200</b>                                                                                                                                                                                          | Hemochromatosis. HFE is a membrane protein that is similar to MHC class I-type proteins and associates with beta2-microglobulin. This protein influences iron                                                                                                               |

|      |            |              |          |     |                                                                                                                                                                                                                                                                                                                                                                                                                                                                                                                                      |
|------|------------|--------------|----------|-----|--------------------------------------------------------------------------------------------------------------------------------------------------------------------------------------------------------------------------------------------------------------------------------------------------------------------------------------------------------------------------------------------------------------------------------------------------------------------------------------------------------------------------------------|
| 6p21 | rs1408272  | SLC17A3      | Slc17a3  |     | absorption by regulating the interaction of the transferrin receptor with transferrin <sup>75</sup> .<br>Solute carrier family 17, sodium phosphate member 3. SLC17A3 is a voltage-driven organic anion transporter involved in elimination of various anionic drugs, as well as in the secretion of endogenous substrates such as urate <sup>76</sup> .                                                                                                                                                                             |
| 6p22 | rs13219787 | HIST1H2AM    |          |     | Histone cluster 1, H2am. HIST1H2AM encodes a member of the histone H2B family and is involved in determination of chromatin structure.                                                                                                                                                                                                                                                                                                                                                                                               |
| 6p22 | rs13219787 | HIST1H2BO    |          |     | Histone cluster 1. HIST1H2BO encodes a member of the histone H2B family and is involved in determination of chromatin structure.                                                                                                                                                                                                                                                                                                                                                                                                     |
| 6p22 | rs13219787 | HIST1H3J     | Hist1h3g |     | HIST1H3J histone cluster 1, H3j. HIST1H3J encodes a member of the histone H3 family and is involved in determination of chromatin structure.                                                                                                                                                                                                                                                                                                                                                                                         |
| 6p22 | rs2097775  | TRIM39-RPP21 |          |     | TRIM39-RPP21 read through. This locus represents naturally occurring read-through transcription between the neighboring TRIM39 (tripartite motif-containing 39) and RPP21 (ribonuclease P/MRP 21kDa subunit) genes on chromosome 6. The read-through transcript encodes a fusion protein that shares sequence identity with each individual gene product <sup>77</sup> .                                                                                                                                                             |
| 6p21 | rs9272219  | HLA-DQA1     |          |     | Major histocompatibility complex, class II, DQ alpha 1. HLA-DQA1 belongs to the HLA class II alpha chain paralogues and are expressed in antigen presenting cells. HLA-DQA1 plays a central role in the immune system by presenting peptides derived from extracellular proteins. Genetic variants at HLA-DQA1 are associated with multiple inflammatory disorders such as ulcerative colitis <sup>78</sup> , SLE <sup>79</sup> and type-1 diabetes mellitus <sup>80</sup> .                                                         |
| 6p21 | rs9272219  | HLA-DQA2     |          |     | Major histocompatibility complex, class II, DQ alpha 2. HLA-DQA2 belongs to the HLA class II alpha chain family, is located in intracellular vesicles and plays a central role in the peptide loading of MHC class II molecules. Class II molecules are expressed in antigen presenting cells and are used to present antigenic peptides on the cell surface to be recognized by CD4 T-cells. Genetic variants at HLA-DQA2 are associated with narcolepsy <sup>81</sup> , SLE <sup>82</sup> and rheumatoid arthritis <sup>83</sup> . |
| 6p21 | rs9349204  | CCND3        | Ccnd3    | Yes | Cyclin D3. CCD3 is a member of the cyclin family, involved in cell cycle progression. CCND3 is thought to be critical for expansion of hematopoietic stem cells <sup>84</sup> .                                                                                                                                                                                                                                                                                                                                                      |
| 6p12 | rs9369427  | VEGFA        | Vegfa    | Yes | Vascular endothelial growth factor A. VEGFA is a member of the PDGF/VEGF growth factor family which binds to and activates a receptor tyrosine kinase involved in the regulation of angiogenesis and vasculogenesis <sup>85</sup> . Elevated levels of this protein is linked to POEMS syndrome, also known as Crow-Fukase syndrome <sup>86</sup> . Mutations in this gene have been associated with proliferative and nonproliferative diabetic retinopathy <sup>87</sup> .                                                         |
| 6q21 | rs1008084  | CCDC162P     | Ccdc162  |     | Coiled-coil domain containing 162, pseudogene                                                                                                                                                                                                                                                                                                                                                                                                                                                                                        |
| 6q23 | rs9389269  | HBS1L        | Hbs1l    |     | HBS1-like ( <i>S. cerevisiae</i> ). HBS1L encodes a GTP-binding elongation factor expressed in multiple tissues. This genomic region influences erythrocyte,                                                                                                                                                                                                                                                                                                                                                                         |

|       |            |                |                 |     |                                                                                                                                                                |                                                                                                                                                                                                                                                                                                                                                                                                                                                                                                                                                                                                                                                    |
|-------|------------|----------------|-----------------|-----|----------------------------------------------------------------------------------------------------------------------------------------------------------------|----------------------------------------------------------------------------------------------------------------------------------------------------------------------------------------------------------------------------------------------------------------------------------------------------------------------------------------------------------------------------------------------------------------------------------------------------------------------------------------------------------------------------------------------------------------------------------------------------------------------------------------------------|
| 6q24  | rs590856   | <i>CITED2</i>  | <i>Cited2</i>   | Yes |                                                                                                                                                                | platelet, and monocyte counts as well as erythrocyte volume and hemoglobin content, and genetic variants at this locus are associated with fetal hemoglobin levels, pain crises in sickle cell disease, and with severity in beta-thalassemia/Hemoglobin E <sup>88-90</sup> .<br>Cbp/p300-interacting transactivator, with Glu/Asp-rich carboxy-terminal domain, 2. CITED2 inhibits transactivation of HIF1A-induced genes by competing with binding of HIF1a to p300-CH1 and is an essential regulator of adult hematopoietic stem cells maintenance <sup>91</sup> . Mutations in this gene are a cause of cardiac septal defects <sup>92</sup> . |
| 6q26  | rs736661   | <i>QKI</i>     | <i>Qk</i>       | Yes |                                                                                                                                                                | Quaking homolog. QK1 is an RNA-binding protein that regulates splicing, stability, and transport of mRNA <sup>93</sup> . Role in haemopoiesis not described.                                                                                                                                                                                                                                                                                                                                                                                                                                                                                       |
| 7p13  | rs12718598 | <i>IKZF1</i>   | <i>Ikzf1</i>    | Yes | Leukemia, acute lymphoblastic                                                                                                                                  | IKAROS family zinc finger 1. IKZF1 is a transcription factor expressed in the fetal and adult hemo-lymphopoietic system, which regulates lymphocyte differentiation <sup>94</sup> . IKZF1 may be involved in the development of acute leukaemia <sup>95</sup> .                                                                                                                                                                                                                                                                                                                                                                                    |
| 7q22  | rs2075672  | <i>ACTL6B</i>  | <i>Actl6b</i>   |     |                                                                                                                                                                | Actin-like 6B. ACTL6B is an actin-related protein involved in cellular vesicular transport, spindle orientation, nuclear migration and chromatin remodelling <sup>96</sup> .                                                                                                                                                                                                                                                                                                                                                                                                                                                                       |
| 7q22  | rs2075672  | <i>TFR2</i>    | <i>Trfr2</i>    | Yes | Hemochromatosis, type 3<br>MIM:604250                                                                                                                          | Transferrin receptor 2. TFR2 mediates cellular uptake of transferrin-bound iron, and which is involved in iron metabolism, hepatocyte function and erythrocyte differentiation <sup>97</sup> .                                                                                                                                                                                                                                                                                                                                                                                                                                                     |
| 7q36  | rs10480300 | <i>PRKAG2</i>  | <i>Prkag2</i>   |     | Cardiomyopathy, familial hypertrophic 6 MIM:600858; Glycogen storage disease of heart, lethal congenital MIM:261740; Wolff-Parkinson-White syndrome MIM:194200 | Protein kinase, AMP-activated, gamma 2 non-catalytic subunit AMP-activated protein kinase. PRKAG2 is a member of the AMPK gamma subunit family which monitors cellular energy status and inactivates key enzymes involved in fatty acid and cholesterol biosynthesis <sup>98</sup> .                                                                                                                                                                                                                                                                                                                                                               |
| 8p11  | rs4737009  | <i>ANK1</i>    | <i>Ank1</i>     | Yes | Spherocytosis, type 1<br>MIM:182900                                                                                                                            | Ankyrin 1. ANK1 link the integral membrane proteins to the underlying spectrin-actin cytoskeleton and is expressed in erythrocytes, brain and muscles <sup>99</sup> . Mutations in ANK1 are associated with hereditary spherocytosis <sup>100</sup> .                                                                                                                                                                                                                                                                                                                                                                                              |
| 8p11  | rs6987853  | <i>C8orf40</i> | <i>AI316807</i> |     |                                                                                                                                                                | Hypothetical protein                                                                                                                                                                                                                                                                                                                                                                                                                                                                                                                                                                                                                               |
| 9p24  | rs2236496  | <i>RCL1</i>    | <i>Rcl1</i>     |     |                                                                                                                                                                | RNA terminal phosphate cyclase-like. RCL1 plays a role in 18S-ribosomal-subunit biogenesis in early pre-rRNA processing <sup>101</sup> .                                                                                                                                                                                                                                                                                                                                                                                                                                                                                                           |
| 9q34  | rs579459   | <i>ABO</i>     | <i>abo</i>      |     |                                                                                                                                                                | ABO blood group (transferase A, alpha 1-3-N-acetylgalactosaminyltransferase; transferase B, alpha 1-3-galactosyltransferase). ABO encodes a glycosyltransferase which converts the H antigen (a cell surface carbohydrate sequence) into the A or B antigen. ABO variants are strongly associated with several phenotypes, including pancreatic <sup>102</sup> and gastric carcinoma <sup>103</sup> and autoimmune disease <sup>104</sup> .                                                                                                                                                                                                        |
| 10q11 | rs901683   | <i>MARCH8</i>  | <i>March8</i>   |     |                                                                                                                                                                | MARCH8 is a ubiquitin ligase which adds ubiquitin to substrate proteins. MARCH8 plays a role in vesicular transport between membrane compartments and induces the internalization of membrane glycoproteins <sup>105, 106</sup> .                                                                                                                                                                                                                                                                                                                                                                                                                  |

|       |            |                 |                      |     |                                                             |                                                                                                                                                                                                                                                                                                                                                                                                                |
|-------|------------|-----------------|----------------------|-----|-------------------------------------------------------------|----------------------------------------------------------------------------------------------------------------------------------------------------------------------------------------------------------------------------------------------------------------------------------------------------------------------------------------------------------------------------------------------------------------|
| 10q22 | rs10159477 | <i>HK1</i>      | <i>Hk1</i>           | Yes | Hemolytic anemia due to hexokinase deficiency<br>MIM:235700 | Hexokinase 1. HK1 encodes a hexokinase present in the outer membrane of mitochondria, which converts glucose to glucose-6-phosphate, the substrate for glycolysis <sup>107</sup> . Mutations in this gene are associated with hemolytic anemia <sup>108</sup> .                                                                                                                                                |
| 10q24 | rs11190134 | <i>NKX2-3</i>   | <i>Nkx2-3</i>        | Yes |                                                             | Homeobox protein Nkx-2.3. NKX2 is a transcription factor which plays a role in the correct association of lymphocytes and splenic stromal elements <sup>109</sup> . Common variants at NKX2-3 are associated with Crohns disease and ulcerative colitis <sup>110</sup> .                                                                                                                                       |
| 11p15 | rs11042125 | <i>AKIP1</i>    | <i>D930014E17Rik</i> |     |                                                             | AKIP1 A kinase (PRKA) interacting protein 1. AKIP1 is a p65-interacting protein involved in NF-kB signalling <sup>111</sup> .                                                                                                                                                                                                                                                                                  |
| 11p15 | rs11042125 | <i>C11orf16</i> | <i>BC051019</i>      |     |                                                             | Hypothetical protein                                                                                                                                                                                                                                                                                                                                                                                           |
| 11p15 | rs11042125 | <i>NRIP3</i>    | <i>Nrip3</i>         |     |                                                             | Nuclear receptor interacting protein 3. Function unknown.                                                                                                                                                                                                                                                                                                                                                      |
| 11p15 | rs11042125 | <i>ST5</i>      | <i>St5</i>           |     |                                                             | Suppression of tumorigenicity 5. ST5 acts as a regulator of MAPK1/ERK2 kinase, and may play a role in tumorigenesis <sup>112</sup> . Disruption of ST5 is associated with mental retardation and multiple congenital anomalies <sup>113</sup> .                                                                                                                                                                |
| 11p15 | rs7936461  | <i>SBF2</i>     | <i>Sbf2</i>          |     | Charcot-Marie-Tooth disease, type 4B2 MIM:604563            | SET binding factor 2. SBF2 is member of the myotubularin-related protein family and encodes an inactive phosphoinositide 3-phosphatase <sup>114</sup> .                                                                                                                                                                                                                                                        |
| 11q13 | rs2302264  | <i>CORO1B</i>   | <i>Coro1b</i>        |     |                                                             | Coronin, actin binding protein, 1B. CORO1B, are WD repeat-containing actin-binding proteins that regulate cell motility <sup>115</sup> .                                                                                                                                                                                                                                                                       |
| 11q13 | rs2302264  | <i>PTPRCAP</i>  | <i>Ptprcap</i>       | Yes |                                                             | Protein tyrosine phosphatase, receptor type, C-associated protein. PTPRCAP is a transmembrane phosphoprotein associated with tyrosine phosphatase PTPRC/CD45, a regulator of T- and B-lymphocyte activation <sup>116</sup> . Function in red blood cell lineage unclear.                                                                                                                                       |
| 11q13 | rs2302264  | <i>RPS6KB2</i>  | <i>Rps6kb2</i>       |     |                                                             | Ribosomal protein S6 kinase, 70kDa, polypeptide 2. RPS6KB2 is a member of the ribosomal S6 kinase family of serine/threonine kinases and is involved in several pathways central to the carcinogenic process, including regulation of cell growth, insulin, and inflammation <sup>117</sup> .                                                                                                                  |
| 11q13 | rs7125949  | <i>ARHGEF17</i> | <i>Arhgef17</i>      |     |                                                             | Rho guanine nucleotide exchange factor (GEF) 17. ARHGEF17 is a guanine nucleotide exchange factors which facilitate the exchange of GDP for GTP to activate Rho- family GTPase. ARHGEF17 is involved in several signalling networks and is predominantly expressed in the heart <sup>118</sup> .                                                                                                               |
| 11q13 | rs7125949  | <i>P2RY6</i>    | <i>P2ry6</i>         |     |                                                             | Pyrimidinergic receptor P2Y, G-protein coupled. P2RY6 is a G-protein coupled receptor activated by extracellular nucleotides. PR2Y6 is expressed in macrophages and aortic endothelial and smooth muscle cells and is involved in both the direct contraction and endothelium-dependent relaxation of the aorta by UDP <sup>119</sup> . P2RY6 plays a role in enhancing vascular inflammation <sup>120</sup> . |
| 12p13 | rs7312105  | <i>CACNA1C</i>  | <i>Cacna1c</i>       |     | Brugada syndrome 3 MIM:611875; Timothy syndrome MIM:601005  | Calcium channel, voltage-dependent, L type, alpha 1C subunit. CACNA1C encodes an alpha-1 subunit of a voltage-dependent calcium channel <sup>121</sup> .                                                                                                                                                                                                                                                       |
| 12p13 | rs10849023 | <i>CCND2</i>    | <i>Ccnd2</i>         | Yes |                                                             | Cyclin D2. CCND2 belongs to the cyclin family, which regulates CDK kinases and plays a role in the cell cycle and tumorigenesis <sup>122</sup> .                                                                                                                                                                                                                                                               |

|       |            |                |                |     |                                                                                                             |                                                                                                                                                                                                                                                                                                                                                                              |
|-------|------------|----------------|----------------|-----|-------------------------------------------------------------------------------------------------------------|------------------------------------------------------------------------------------------------------------------------------------------------------------------------------------------------------------------------------------------------------------------------------------------------------------------------------------------------------------------------------|
| 12q22 | rs11104870 | <i>KITLG</i>   | <i>Kitl</i>    | Yes | Hyperpigmentation, familial progressive, 2 MIM:145250;                                                      | KIT ligand. KITLG encodes the ligand of the KIT tyrosine-kinase receptor, separately identified as a candidate gene locus influencing red blood cell traits. KITLG is also known as Stem Cell Factor and augments mobilisation and proliferation of haematopoietic progenitor cells, synergistically with other haemopoietic growth factors <sup>123</sup> .                 |
| 12q24 | rs3184504  | <i>ATXN2</i>   | <i>Atxn2</i>   |     | Spinocerebellar ataxia 2 MIM:183090                                                                         | Ataxin 2. ATXN2 is a protein whose function is unknown. Mutations in ATXN2 cause spinocerebellar ataxia type 2 (SCA2) and increases the risk of developing ALS <sup>124, 125</sup> .                                                                                                                                                                                         |
| 12q24 | rs3184504  | <i>SH2B3</i>   | <i>Sh2b3</i>   | Yes | Erythrocytosis, somatic MIM:133100; Myelofibrosis, somatic MIM:254450; Thrombocytopenia, somatic MIM:187950 | SH2B adaptor protein 3. SH2B3 is a member of the SH2B adaptor family of proteins, and is a regulator of cytokine signalling by growth factors involved in haematopoiesis <sup>126</sup> .                                                                                                                                                                                    |
| 12q24 | rs3829290  | <i>ACADS</i>   | <i>Acads</i>   |     | Short-chain acyl-CoA dehydrogenase deficiency MIM: 606885                                                   | Encodes a mitochondrial flavoprotein, which catalyzes the initial step of the mitochondrial fatty acid beta-oxidation pathway. Mutations in this gene Underlie Short Chain Acyl-CoA Dehydrogenase Deficiency.                                                                                                                                                                |
| 12q24 | rs3829290  | <i>MLEC</i>    | <i>Mlec</i>    |     |                                                                                                             | Malectin. MLEC is a carbohydrate-binding protein which plays a role in the genesis, processing and secretion of N-glycosylated proteins <sup>127</sup> .                                                                                                                                                                                                                     |
| 14q23 | rs7155454  | <i>FNTB</i>    | <i>Fntb</i>    | Yes |                                                                                                             | Farnesyltransferase, CAAX box, beta. FNTB catalyzes the transfer of a farnesyl moiety from farnesyl pyrophosphate to a cysteine residues as post-translational modification <sup>128</sup> .                                                                                                                                                                                 |
| 14q23 | rs7155454  | <i>MAX</i>     | <i>Max</i>     |     |                                                                                                             | MYC associated factor X. MAX is a transcription regulator involved in cell proliferation, differentiation and apoptosis <sup>129</sup> . Function in red blood cell lineage unknown.                                                                                                                                                                                         |
| 14q24 | rs11627546 | <i>SMOC1</i>   | <i>Smoc1</i>   |     | Microphthalmia with limb anomalies MIM:206920                                                               | SPARC related modular calcium binding 1. SMOC1 is a calcium binding glycoprotein found in the basement membrane that may have a role in ocular and limb development <sup>130, 131</sup> .                                                                                                                                                                                    |
| 14q32 | rs17616316 | <i>EIF5</i>    | <i>Eif5</i>    |     |                                                                                                             | Eukaryotic translation initiation factor-5. EIF5 interacts with the 40S initiation complex to promote hydrolysis of bound GTP. The resulting functional 80S ribosomal initiation complex is then active <sup>132</sup> .                                                                                                                                                     |
| 15q21 | rs1532085  | <i>LIPC</i>    | <i>Lipc</i>    |     | Hepatic lipase deficiency MIM:614025;                                                                       | Lipase, hepatic. LIPC encodes hepatic triglyceride lipase, which is expressed in liver. LIPC has the dual functions of triglyceride hydrolase and ligand/bridging factor for receptor-mediated lipoprotein uptake <sup>133</sup> . Variants in LIPC are associated with intermediate and large drusen, as well as advanced age-related macular degeneration <sup>134</sup> . |
| 15q22 | rs2572207  | <i>DENND4A</i> | <i>Dennd4a</i> |     |                                                                                                             | DENN/MADD domain containing 4A. DENND4A is a transcription factor involved in interferon signalling. DENND4A is ubiquitously expressed with highest levels in bone marrow <sup>135</sup> . Function in red blood cell lineage not described.                                                                                                                                 |
| 15q22 | rs2572207  | <i>PTPLAD1</i> | <i>Ptplad1</i> |     |                                                                                                             | Protein tyrosine phosphatase-like A domain containing 1. PTPLAD1 is a transmembrane protein involved in very long chain fatty acid synthesis and which may also influence gene expression <sup>136</sup> .                                                                                                                                                                   |



|       |            |          |                  |                                  |                                                                                                                                                                                                                                                                                                                                                                                                   |
|-------|------------|----------|------------------|----------------------------------|---------------------------------------------------------------------------------------------------------------------------------------------------------------------------------------------------------------------------------------------------------------------------------------------------------------------------------------------------------------------------------------------------|
| 15q24 | rs8028632  | PPCDC    | <i>Ppcdc</i>     |                                  | Phosphopantothencysteine decarboxylase. PPCDC is an enzyme involved in biosynthesis of coenzyme A, an essential component of fatty acid synthesis and oxidation, and pyruvate oxidation <sup>137</sup> .                                                                                                                                                                                          |
| 15q24 | rs8028632  | SCAMP5   | <i>Scamp5</i>    |                                  | Secretory carrier membrane protein 5. SCAMP5 is a membrane protein required for the calcium-dependent exocytosis of signal sequence-containing cytokines <sup>138</sup> . May play a role in accumulation of expanded polyglutamine protein huntingtin in case of endoplasmic reticulum stress by inhibiting the endocytosis pathway <sup>139</sup> .                                             |
| 15q24 | rs11072566 | NRG4     | <i>Nrg4</i>      |                                  | Neuregulin 4. NRG4 is a ligand for tyrosine-kinase receptors involved in growth factor signalling epidermal growth factor receptors <sup>140</sup> .                                                                                                                                                                                                                                              |
| 15q25 | rs2867932  | DNAJA4   | <i>Dnaja4</i>    |                                  | DNAJ (Hsp40) homolog, subfamily A, member 4. DNAJA4 is a SREBP-responsive gene which has been reported to be involved in cholesterol biosynthesis <sup>141</sup> .                                                                                                                                                                                                                                |
| 15q25 | rs2867932  | WDR61    | <i>Wdr61</i>     |                                  | WD repeat domain 61. WDR61 may be involved in transcriptional regulation <sup>142</sup> . Function in red blood cell lineage not described.                                                                                                                                                                                                                                                       |
| 16p11 | rs11248850 | NPRL3    | <i>npnl3</i>     |                                  | Nitrogen permease regulator-like 3. NPRL3 is a protein that forms a heterodimer with NPRL2 <sup>143</sup> . Function unknown.                                                                                                                                                                                                                                                                     |
| 16q22 | rs2271294  | CTRL     | <i>Ctrl</i>      |                                  | Chymotrypsin-like. CTRL is a protease related to Chymotrypsin and synthesized primarily in pancreas <sup>144</sup> . Function uncertain.                                                                                                                                                                                                                                                          |
| 16q22 | rs2271294  | EDC4     | <i>Edc4</i>      |                                  | Enhancer of mRNA decapping 4. EDC4 is a component of a complex containing DCP2 and DCP1A that plays a role in mRNA decapping during the process of mRNA degradation <sup>145</sup> . Red blood cell function unknown.                                                                                                                                                                             |
| 16q22 | rs2271294  | NUTF2    | <i>Nutf2-ps1</i> |                                  | Nuclear transport factor 2. NUTF2 is a cytosolic factor that facilitates protein transport into the nucleus via interaction with the nuclear pore complex glycoprotein <sup>146</sup> .                                                                                                                                                                                                           |
| 16q22 | rs2271294  | PSMB10   | <i>Psmb10</i>    | Yes                              | Proteasome (prosome, macropain) subunit, beta type, 10. The proteasome is a multicatalytic proteinase complex. This subunit is involved in antigen processing to generate class I binding peptides.                                                                                                                                                                                               |
| 16q24 | rs10445033 | PIEZO1   | <i>Fam38a</i>    |                                  | Piezo-type mechanosensitive ion channel component 1. PIEZO1 is a component of mechanosensitive channel required for the mechanosensitive currents. Plays a role in epithelial cell adhesion by maintaining integrin activation <sup>147</sup> .                                                                                                                                                   |
| 17p11 | rs888424   | SPECC1   | <i>Specc1</i>    |                                  | Sperm antigen with calponin homology and coiled-coil domains 1. SPECC1 belongs to the cytospin-A family and is localized in the nucleus. SPECC1 highly expressed in testis and some cancer cell lines <sup>148</sup> . A chromosomal translocation involving this gene and platelet-derived growth factor receptor, beta gene may be a cause of juvenile myelomonocytic leukemia <sup>149</sup> . |
| 17q11 | rs2070265  | C17orf63 | <i>BC017647</i>  |                                  | Hypothetical protein                                                                                                                                                                                                                                                                                                                                                                              |
| 17q11 | rs2070265  | ERAL1    | <i>Eral1</i>     |                                  | Era G-protein-like 1 (E. coli). ERAL1 is a GTPase, which may play a role in mitochondrial ribosomal small subunit assembly <sup>150</sup> .                                                                                                                                                                                                                                                       |
| 17q11 | rs2070265  | NEK8     | <i>Nek8</i>      | Nephronophthisis 9<br>MIM:613824 | NIMA (never in mitosis gene a)- related kinase 8. NEK8 a member of the serine/threonine protein kinase family related to NIMA of <i>Aspergillus nidulans</i> <sup>151</sup> .                                                                                                                                                                                                                     |

|       |            |          |                   |     |                                                                                                                                                                                                                                                                                                                                                                                                              |
|-------|------------|----------|-------------------|-----|--------------------------------------------------------------------------------------------------------------------------------------------------------------------------------------------------------------------------------------------------------------------------------------------------------------------------------------------------------------------------------------------------------------|
| 17q11 | rs2070265  | TRAF4    | Traf4             |     | NEK8 is required for renal tubular integrity and may play a role in cell cycle progression <sup>152, 153</sup> .                                                                                                                                                                                                                                                                                             |
| 17q12 | rs8182252  | CDK12    | Cdk12             |     | TNF receptor-associated factor 4. TRAF4 is an adapter protein and signal transducer that links members of the tumor necrosis factor receptor family to different signaling pathways <sup>154</sup> . Plays a role in the activation of NF-kappa-B and JNK, and in the regulation of cell survival and apoptosis <sup>155</sup> .                                                                             |
| 17q12 | rs8182252  | NEUROD2  | Neurod2           |     | Cyclin-dependent kinase 12. CDK12 is a cyclin-dependent kinase required for RNA splicing <sup>156</sup> . CDK12 may be involved in regulation of transcription elongation. <sup>157</sup>                                                                                                                                                                                                                    |
| 17q21 | rs2269906  | SLC4A1   | Slc4a1            | Yes | Neurogenic differentiation 2. NEUROD2 is a neurogenic basic helix-loop-helix protein found mainly in endovascular invasive cells. NEUROD2 can induce transcription from neuron-specific promoters <sup>158</sup> . NEUROD2 is thought to play a role in the determination and maintenance of neuronal cell fates <sup>159</sup> .                                                                            |
| 17q21 | rs2269906  | UBTF     | Ubtfl1            |     | Solute carrier family 4, anion exchanger, member 1. SLC4A1 is an anion exchanger expressed in the erythrocyte plasma membrane involved in carbon dioxide transport from tissues to lungs <sup>160</sup> . SLC4A1 is associated with the red blood cell membrane protein glycophorin A <sup>161</sup> . Mutations in SLC4A1 can result in hereditary spherocytosis, ovalocytosis and anaemia <sup>162</sup> . |
| 17q21 | rs12150672 | ARHGAP27 | Arhgap27          |     | Upstream binding transcription factor, RNA polymerase. UBTF is a transcription factor involved in expression of ribosomal RNA <sup>163</sup> .                                                                                                                                                                                                                                                               |
| 17q21 | rs12150672 | ARL17B   |                   |     | Rho GTPase activating protein 27. ARHGAP27 is a GTPase-activating protein which may be involved in clathrin-mediated endocytosis, and internalization of transferrin receptors <sup>164</sup> .                                                                                                                                                                                                              |
| 17q21 | rs12150672 | C17orf69 |                   |     | ADP-ribosylation factor-like 17B. ARL17B is a GTP-binding protein which may be involved in protein trafficking and vesicle transport <sup>165</sup> .                                                                                                                                                                                                                                                        |
| 17q21 | rs12150672 | CRHR1    | Crhr1             |     | Hypothetical protein                                                                                                                                                                                                                                                                                                                                                                                         |
| 17q21 | rs12150672 | SPPL2C   | 4933407P1<br>4Rik |     | Corticotropin releasing hormone receptor 1. CRHR1 is a G-protein coupled receptor found in the central nervous system, which may influence ACTH release and physiological processes such as reproduction, immune response and obesity <sup>166</sup> .                                                                                                                                                       |
| 17q21 | rs12150672 | KANSL1   | 1700081L11<br>Rik |     | Signal peptide peptidase like 2C. SPPL2C is an enzyme that may act as intramembrane protease <sup>167</sup> . Function unknown.                                                                                                                                                                                                                                                                              |
| 17q21 | rs12150672 | MAPT     | Mapt              | Yes | KAT8 regulatory NSL complex subunit 1. Encodes a protein that is a component of the MLL1/MLL complex <sup>168</sup> , a transcriptional coactivator that plays a role in regulating gene expression during early development and hematopoiesis <sup>169</sup> .                                                                                                                                              |
|       |            |          |                   |     | Dementia, frontotemporal, with or without parkinsonism MIM:600274; Pick disease MIM:172700; Supranuclear                                                                                                                                                                                                                                                                                                     |
|       |            |          |                   |     | Microtubule-associated protein tau. MAPT promotes microtubule assembly and stability <sup>170</sup> , and might be involved in the establishment and maintenance of neuronal polarity <sup>171</sup> . Mutations in MAPT have been linked to several neurological disorders <sup>172, 173</sup> .                                                                                                            |

palsy, progressive  
MIM:601104; Supranuclear  
palsy, progressive atypical  
MIM:260540; Tauopathy and  
respiratory failure MIM:601104  
;

|       |            |                 |                                 |     |                                                                                                                                                                                                                                                                                                                                                                                                                                                                                                |
|-------|------------|-----------------|---------------------------------|-----|------------------------------------------------------------------------------------------------------------------------------------------------------------------------------------------------------------------------------------------------------------------------------------------------------------------------------------------------------------------------------------------------------------------------------------------------------------------------------------------------|
| 17q21 | rs12150672 | <i>STH</i>      |                                 |     | Saitohin. STH is a gene located in the human TAU gene, and which be involved in the pathogenesis of neurodegenerative disease <sup>174</sup> . Function in red blood cell lineage not described.                                                                                                                                                                                                                                                                                               |
| 17q25 | rs4969184  | <i>PGS1</i>     | <i>Pgs1</i>                     |     | Phosphatidylglycerophosphate synthase 1. PGS1 is an enzyme involved in the biosynthesis of phospholipids and cardiolipin <sup>175</sup> . Function in red blood cell lineage not described.                                                                                                                                                                                                                                                                                                    |
| 18q21 | rs4890633  | <i>C18orf25</i> | <i>8030462N1</i><br><i>7Rik</i> |     | Hypothetical protein                                                                                                                                                                                                                                                                                                                                                                                                                                                                           |
| 19p13 | rs2159213  | <i>AP3D1</i>    | <i>Ap3d1</i>                    | Yes | Adaptor-related protein complex 3, delta 1 subunit. AP3D1 is part of the AP-3 complex, an adaptor-related complex which may play a role in vesicle formation and lysosomal trafficking <sup>176</sup> .                                                                                                                                                                                                                                                                                        |
| 19p13 | rs732716   | <i>MPND</i>     | <i>Mpnd</i>                     |     | MPN domain-containing protein. MPND is likely to be a protease. Function unknown.                                                                                                                                                                                                                                                                                                                                                                                                              |
| 19p13 | rs732716   | <i>SH3GL1</i>   | <i>Sh3gl1</i>                   |     | SH3-domain GRB2-like. SH3GL1 is a member of the endophilin family of Src homology 3 domain-containing proteins, and is involved in endocytosis and regulation of the cell cycle <sup>177</sup> . SH3GL1 is implicated in acute myeloid leukemia as a fusion partner of the myeloid-lymphoid leukemia protein <sup>178</sup> .                                                                                                                                                                  |
| 19p13 | rs732716   | <i>UBXN6</i>    | <i>Ubxn6</i>                    |     | UBX domainprotein 6. UBXN6 is a VCP-interacting protein that is involved in endoplasmic reticulum-associated degradation <sup>179</sup> .                                                                                                                                                                                                                                                                                                                                                      |
| 19p13 | rs741702   | <i>CALR</i>     | <i>Calr</i>                     |     | Calreticulin. CALR is a multifunctional Ca(2+) binding chaperone in the endoplasmic reticulum and expression of the protein is tightly regulated at the transcriptional level. CALR is critical for cardiac development and expression of the protein must be tightly regulated during cardiogenesis. Differential expression of calreticulin has been associated with several diseases, including neurodegenerative problems, cancers, autoimmune diseases and wound healing <sup>180</sup> . |
| 19p13 | rs741702   | <i>FARSA</i>    | <i>Farsa</i>                    |     | Phenylalanyl-tRNA synthetase, alpha subunit. FARSA belongs to a class of enzymes that charge tRNAs with their cognate amino acids <sup>181</sup> . FARSA is expressed in a tumor-selective and cycle stale stage- and differentiation-dependent manner <sup>182</sup> .                                                                                                                                                                                                                        |
| 19p13 | rs741702   | <i>SYCE2</i>    | <i>Syce2</i>                    |     | Synaptonemal complex central element protein 2. SYCE2 is a major component of the transverse central element of synaptonemal complexes (SCS), formed between homologous chromosomes during meiotic prophase <sup>183</sup> . May have a role in the synaptonemal complexes assembly, stabilization and recombination <sup>184</sup> .                                                                                                                                                          |

|       |           |                |                |     |                                                                                             |                                                                                                                                                                                                                                                                           |
|-------|-----------|----------------|----------------|-----|---------------------------------------------------------------------------------------------|---------------------------------------------------------------------------------------------------------------------------------------------------------------------------------------------------------------------------------------------------------------------------|
| 19q13 | rs3892630 | <i>NUDT19</i>  | <i>Nudt19</i>  |     |                                                                                             | Nudix (nucleoside diphosphate linked moiety X)-type motif 19. NUDT19 is a coenzyme A diphosphatase that mediates the hydrolysis of a wide range of CoA esters <sup>185</sup> .                                                                                            |
| 20q13 | rs737092  | <i>RBM38</i>   | <i>Rbm38</i>   |     |                                                                                             | RBM38 RNA binding motif protein 38. RBM38 acts as a mediator of the p53/TP53 family to regulate CDKN1A to induce cell cycle arrest <sup>186</sup> .                                                                                                                       |
| 21q22 | rs2032314 | <i>ATP5O</i>   | <i>Atp5o</i>   |     |                                                                                             | ATP5O ATP synthase, H <sup>+</sup> transporting, mitochondrial F1 complex, O subunit. ATP5O is a component of the F-type ATPase found in the mitochondrial matrix which produces ATP from ADP <sup>187</sup> .                                                            |
| 22q11 | rs5754217 | <i>UBE2L3</i>  | <i>Ube2l3</i>  |     |                                                                                             | Ubiquitin-conjugating enzyme E2L 3. UBE2L3 is a member of the E2 ubiquitin-conjugating enzyme family <sup>188</sup> .                                                                                                                                                     |
| 22q11 | rs5754217 | <i>YDJC</i>    | <i>Ydjc</i>    |     |                                                                                             | YdjC homolog; function unknown.                                                                                                                                                                                                                                           |
| 22q12 | rs5749446 | <i>FBXO7</i>   | <i>Fbxo7</i>   |     | Parkinson disease 15, autosomal recessive MIM:260300                                        | F-box protein 7. FBOX7 is a member of the F-box protein family which function in phosphorylation-dependent ubiquitination <sup>189</sup> . FBOX7 may play a role in regulation of haematopoiesis <sup>190</sup> .                                                         |
| 22q12 | rs855791  | <i>KCTD17</i>  | <i>Kctd17</i>  |     |                                                                                             | Potassium channel tetramerisation domain containing 17. Function unknown.                                                                                                                                                                                                 |
| 22q12 | rs855791  | <i>TMPRSS6</i> | <i>Tmprss6</i> | Yes | Iron-refractory iron deficiency anemia MIM:206200                                           | Transmembrane protease, serine 6. TMPRSS6 is a transmembrane serine proteinase involved in iron metabolism <sup>191</sup> . Mutations in TMPRSS6 cause iron-refractory iron deficiency anaemia <sup>192</sup> .                                                           |
| 22q13 | rs140522  | <i>TYMP</i>    | <i>Tymp</i>    |     | Mitochondrial DNA depletion syndrome 1 (MNGIE type) MIM:603041                              | Thymidine Phosphorylase. TYPM encodes an angiogenic factor which promotes angiogenesis in vivo and stimulates the in vitro growth of a variety of endothelial cells. It has a highly restricted target cell specificity acting only on endothelial cells <sup>193</sup> . |
| 22q13 | rs140522  | <i>NCAPH2</i>  | <i>Ncaph2</i>  | Yes |                                                                                             | Non-SMC condensin II complex, subunit H2. NCAPH2 is a regulatory subunit of the condensin-2 complex, a complex that plays a role in mitotic chromosome assembly <sup>194</sup> . May play a lineage-specific role in T-cell development <sup>195</sup> .                  |
| 22q13 | rs140522  | <i>ODF3B</i>   | <i>Odf3b</i>   |     |                                                                                             | Outer dense fiber of sperm tails 3B. Function unknown                                                                                                                                                                                                                     |
| 22q13 | rs140522  | <i>SCO2</i>    | <i>Sco2</i>    |     | Cardioencephalomyopathy, fatal infantile, due to cytochrome c oxidase deficiency MIM:604377 | SCO cytochrome oxidase deficient homolog 2 (yeast). SCO2 plays a role in ATP production <sup>196</sup> . Mutations in this gene are associated with cardiac and neurologic disease <sup>197</sup> .                                                                       |

**Supplementary Table 15.** Definitions of cell types in the Differentiation Map of Haematology (<http://www.broadinstitute.org/dmap/home>) used to investigate expression of the 121 candidate genes in haematologic precursors.

| <b>Abbreviation</b> | <b>Description</b>                       |
|---------------------|------------------------------------------|
| BASO                | Basophils                                |
| TCELL1              | CD4+ Central Memory                      |
| TCELL2              | CD4+ Effector Memory                     |
| TCELL3              | CD8+ Central Memory                      |
| TCELL4              | CD8+ Effector Memory                     |
| TCELL5              | CD8+ Effector Memory RA                  |
| GRAN1               | Colony Forming Unit-Granulocyte          |
| MK1                 | Colony Forming Unit-Megakaryocytic       |
| MONO1               | Colony Forming Unit-Monocyte             |
| CMP                 | Common myeloid progenitor                |
| PreBCELL2           | Early B-cell                             |
| EOS                 | Eosinophil                               |
| EB1                 | Erythroid_CD34+ CD71+ GlyA-              |
| EB2                 | Erythroid_CD34- CD71+ GlyA-              |
| EB3                 | Erythroid_CD34- CD71+ GlyA+              |
| EB4                 | Erythroid_CD34- CD71lo GlyA+             |
| EB5                 | Erythroid_CD34- CD71- GlyA+              |
| GMP                 | Granulocyte/monocyte progenitor          |
| GRAN3               | Granulocyte (Neutrophil)                 |
| GRAN2               | Granulocyte (Neutrophilic Metamyelocyte) |
| HSC1                | Hematopoietic stem cell_CD133+ CD34dim   |
| HSC2                | Hematopoietic stem cell_CD38- CD34+      |
| BCELL2              | Mature B-cell class able to switch       |
| BCELL3              | Mature B-cell class switched             |
| BCELL4              | Mature B-cells                           |
| NK1                 | Mature NK cell_CD56- CD16- CD3-          |
| NK2                 | Mature NK cell_CD56- CD16+ CD3-          |
| NK3                 | Mature NK cell_CD56+ CD16+ CD3-          |
| MK2                 | Megakaryocyte                            |
| MEP                 | Megakaryocyte/ erythroid progenitor      |
| MONO2               | Monocyte                                 |
| DEND1               | Myeloid Dendritic Cell                   |
| BCELL1              | Naïve B-cells                            |
| TCELL6              | Naive CD4+ T-cell                        |
| TCELL7              | Naive CD8+ T-cell                        |
| NKT                 | NKT                                      |
| DEND2               | Plasmacytoid Dendritic Cell              |
| PreBCELL1           | Pro B-cell                               |

**Supplementary Table 16.** Nucleosome deplete regions identified by FAIRE-seq, containing either a sentinel SNP from the RBC GWAS or a SNP in high LD ( $r^2 > 0.8$ ). Cell type: EB - erythroblasts, MO - monocytes, MK - megakaryocytes. Distance: the distance between the Sentinel SNP and the NDR SNP.

| GWAS region |        |              |     |             |                             | Nucleosome-depleted region |                |              |            |             |             |       |               |
|-------------|--------|--------------|-----|-------------|-----------------------------|----------------------------|----------------|--------------|------------|-------------|-------------|-------|---------------|
| #           | Region | Sentinel SNP | Chr | Position    | Candidate gene(s)           | Cell type                  | Start position | End position | NDR SNP    | Position    | Allele freq | $r^2$ | Distance (bp) |
| 1           | 1p36   | rs1175550    | 1   | 3,691,528   | <i>CCDC27, LRRC48</i>       | EB                         | 3,691,366      | 3,691,660    | rs1175550  | 3,691,528   | 0.206       | 1.000 | 0             |
| 2           | 1p32   | rs741959     | 1   | 47,676,233  | <i>TAL1</i>                 | EB                         | 47,679,193     | 47,679,296   | rs4926524  | 47,679,258  | 0.561       | 0.850 | 3,025         |
| 3           | 1q23   | rs857684     | 1   | 158,575,729 | <i>OR6Y1, OR10Z1, SPTA1</i> | MO                         | 158,596,370    | 158,596,475  | rs2482963  | 158,596,438 | 0.278       | 0.941 | 20,709        |
| 4           | 1q32   | rs7529925    | 1   | 199,007,208 | <i>MIR181A1</i>             | EB                         | 199,010,573    | 199,011,066  | rs1434282  | 199,010,721 | 0.724       | 0.929 | 3,513         |
|             |        |              |     |             |                             | MK                         | 199,010,612    | 199,011,128  | rs1434282  | 199,010,721 | 0.724       | 0.929 | 3,513         |
| 5           | 2q13   | rs10207392   | 2   | 111,849,659 | <i>ACOXL</i>                | MO                         | 111,843,101    | 111,843,381  | rs2880112  | 111,843,166 | 0.435       | 0.842 | 6,493         |
| 6           | 3q22   | rs6776003    | 3   | 141,266,493 | <i>RASA2</i>                | EB                         | 141,217,874    | 141,218,028  | rs6808837  | 141,217,954 | 0.384       | 0.857 | 48,539        |
|             |        |              |     |             |                             | MO                         | 141,217,713    | 141,218,095  | rs6808837  | 141,217,954 | 0.384       | 0.857 | 48,539        |
| 7           | 3q23   | rs13061823   | 3   | 142,120,786 | <i>XRN1</i>                 | MK                         | 142,233,859    | 142,234,023  | rs6791816  | 142,233,990 | 0.589       | 0.824 | 113,204       |
| 8           | 4q11   | rs218238     | 4   | 55,395,024  | <i>KIT</i>                  | EB                         | 55,408,759     | 55,409,035   | rs218264   | 55,408,875  | 0.258       | 0.834 | 13,851        |
|             |        |              |     |             |                             | EB                         | 122,744,961    | 122,745,400  | rs769236   | 122,745,038 | 0.368       | 1.000 | 6,023         |
| 9           | 4q27   | rs13152701   | 4   | 122,751,061 | <i>BBS7, CCNA2</i>          | MK                         | 122,750,001    | 122,750,254  | rs13145213 | 122,750,079 | 0.369       | 0.994 | 982           |
|             |        |              |     |             |                             | EB                         | 122,791,573    | 122,791,906  | rs2271176  | 122,791,601 | 0.368       | 1.000 | 40,540        |
| 10          | 6p21   | rs9349204    | 6   | 41,914,378  | <i>CCND3</i>                | EB                         | 41,924,850     | 41,925,202   | rs9349205  | 41,925,159  | 0.234       | 0.850 | 10,781        |
| 11          | 6q21   | rs1008084    | 6   | 109,626,965 | <i>CCDC162</i>              | EB                         | 109,625,663    | 109,626,087  | rs1546723  | 109,625,879 | 0.422       | 0.989 | 1,086         |
|             |        |              |     |             |                             | MK                         | 109,625,692    | 109,625,981  | rs1546723  | 109,625,879 | 0.422       | 0.989 | 1,086         |
|             |        |              |     |             |                             | EB                         | 135,419,430    | 135,419,712  | rs9389268  | 135,419,631 | 0.271       | 0.911 | 7,528         |
|             |        |              |     |             |                             | EB                         | 135,419,430    | 135,419,712  | rs9376091  | 135,419,636 | 0.271       | 0.911 | 7,523         |
| 12          | 6q23   | rs9389269    | 6   | 135,427,159 | <i>HBS1L</i>                | EB                         | 135,419,430    | 135,419,712  | rs9402685  | 135,419,688 | 0.271       | 0.911 | 7,471         |
|             |        |              |     |             |                             | EB                         | 135,431,304    | 135,431,674  | rs6920211  | 135,431,318 | 0.258       | 0.850 | 4,159         |
|             |        |              |     |             |                             | EB                         | 135,431,304    | 135,431,674  | rs9494142  | 135,431,640 | 0.255       | 0.863 | 4,481         |
| 13          | 6q24   | rs590856     | 6   | 139,844,429 | <i>CITED2</i>               | EB                         | 139,839,765    | 139,840,281  | rs589235   | 139,839,960 | 0.499       | 0.904 | 4,469         |
|             |        |              |     |             |                             | EB                         | 164,463,287    | 164,463,672  | rs4709819  | 164,463,355 | 0.446       | 1.000 | 19,481        |
| 14          | 6q26   | rs736661     | 6   | 164,482,836 | <i>QKI</i>                  | MK                         | 164,463,305    | 164,463,683  | rs4709819  | 164,463,355 | 0.446       | 1.000 | 19,481        |
|             |        |              |     |             |                             | EB                         | 164,463,287    | 164,463,672  | rs4709820  | 164,463,572 | 0.446       | 1.000 | 19,264        |
|             |        |              |     |             |                             | MK                         | 164,463,305    | 164,463,683  | rs4709820  | 164,463,572 | 0.446       | 1.000 | 19,264        |
|             |        |              |     |             |                             | EB                         | 41,630,153     | 41,630,603   | rs4737009  | 41,630,405  | 0.261       | 1.000 | 0             |
| 15          | 8p11   | rs4737009    | 8   | 41,630,405  | <i>ANK1</i>                 | MK                         | 41,630,356     | 41,630,449   | rs4737009  | 41,630,405  | 0.261       | 1.000 | 0             |
|             |        |              |     |             |                             | EB                         | 41,630,153     | 41,630,603   | rs4737010  | 41,630,447  | 0.250       | 0.946 | 42            |
|             |        |              |     |             |                             | MK                         | 41,630,356     | 41,630,449   | rs4737010  | 41,630,447  | 0.250       | 0.946 | 42            |
| 16          | 9p24   | rs2236496    | 9   | 4,844,265   | <i>RCL1</i>                 | EB                         | 4,852,346      | 4,852,777    | rs10758656 | 4,852,599   | 0.193       | 0.950 | 8,334         |
|             |        |              |     |             |                             | EB                         | 45,966,011     | 45,966,515   | rs901683   | 45,966,422  | 0.079       | 1.000 | 0             |
| 17          | 10q11  | rs901683     | 10  | 45,966,422  | <i>MARCH8</i>               | EB                         | 46,039,726     | 46,040,064   | rs75595592 | 46,039,930  | 0.079       | 1.000 | 73,508        |
|             |        |              |     |             |                             | MK                         | 46,052,986     | 46,053,213   | rs9422657  | 46,053,061  | 0.079       | 1.000 | 86,639        |

|    |       |            |    |            |                                                                     |    |            |            |            |            |       |       |         |
|----|-------|------------|----|------------|---------------------------------------------------------------------|----|------------|------------|------------|------------|-------|-------|---------|
| 18 | 11p15 | rs11042125 | 11 | 8,938,049  | <i>AKIP1, C11orf16, NRIP3, ST5</i>                                  | MO | 9,023,307  | 9,023,742  | rs7479407  | 9,023,421  | 0.413 | 0.873 | 85,372  |
| 19 | 11q13 | rs7125949  | 11 | 73,009,084 | <i>ARHGEF17, P2RY6</i>                                              | MO | 73,115,131 | 73,115,357 | rs7114009  | 73,115,314 | 0.114 | 0.827 | 106,230 |
| 20 | 14q23 | rs7155454  | 14 | 65,502,239 | <i>FNTB, MAX</i>                                                    | MK | 65,499,871 | 65,500,238 | rs12435835 | 65,499,909 | 0.481 | 0.989 | 2,330   |
|    |       |            |    |            |                                                                     | EB | 65,509,783 | 65,510,185 | rs11628273 | 65,509,878 | 0.481 | 0.989 | 7,639   |
| 21 | 15q22 | rs2572207  | 15 | 66,070,693 | <i>DENND4A, PTPLAD1</i>                                             | MK | 65,509,766 | 65,510,128 | rs11628273 | 65,509,878 | 0.481 | 0.989 | 7,639   |
|    |       |            |    |            |                                                                     | EB | 66,070,410 | 66,070,913 | rs2572207  | 66,070,693 | 0.209 | 1.000 | 0       |
| 22 | 15q24 | rs8028632  | 15 | 75,321,262 | <i>PPCDC, SCAMP5</i>                                                | EB | 75,315,650 | 75,316,026 | rs2304903  | 75,315,778 | 0.225 | 1.000 | 5,484   |
|    |       |            |    |            |                                                                     | MK | 75,315,722 | 75,315,936 | rs2304903  | 75,315,778 | 0.225 | 1.000 | 5,484   |
|    |       |            |    |            |                                                                     | MK | 75,322,112 | 75,322,277 | rs35911108 | 75,322,179 | 0.225 | 1.000 | 917     |
|    |       |            |    |            |                                                                     | MO | 75,354,500 | 75,354,655 | rs35577967 | 75,354,621 | 0.212 | 0.881 | 33,359  |
| 23 | 16p11 | rs11248850 | 16 | 163,598    | <i>NPRL3</i>                                                        | EB | 163,293    | 163,915    | rs11248850 | 163,598    | 0.487 | 1.000 | 0       |
|    |       |            |    |            |                                                                     | MK | 163,466    | 163,821    | rs11248850 | 163,598    | 0.487 | 1.000 | 0       |
|    |       |            |    |            |                                                                     | EB | 163,293    | 163,915    | rs11865131 | 163,667    | 0.487 | 1.000 | 69      |
|    |       |            |    |            |                                                                     | MK | 163,466    | 163,821    | rs11865131 | 163,667    | 0.487 | 1.000 | 69      |
|    |       |            |    |            |                                                                     | EB | 169,902    | 170,268    | rs11866877 | 170,044    | 0.460 | 0.850 | 6,446   |
| 24 | 16q22 | rs2271294  | 16 | 67,902,326 | <i>CTRL, EDC4, NUTF2, PSMB10</i>                                    | EB | 67,926,933 | 67,927,181 | rs7196789  | 67,927,124 | 0.172 | 0.991 | 24,798  |
|    |       |            |    |            |                                                                     | MK | 67,926,943 | 67,927,172 | rs7196789  | 67,927,124 | 0.172 | 0.991 | 24,798  |
| 25 | 16q24 | rs10445033 | 16 | 88,840,462 | <i>PIEZO1</i>                                                       | EB | 88,840,369 | 88,840,702 | rs10445033 | 88,840,462 | 0.634 | 1.000 | 0       |
|    |       |            |    |            |                                                                     | MK | 88,840,437 | 88,840,569 | rs10445033 | 88,840,462 | 0.634 | 1.000 | 0       |
| 26 | 17q21 | rs2269906  | 17 | 42,294,337 | <i>SLC4A1, UBTF</i>                                                 | EB | 42,323,033 | 42,323,732 | rs7209801  | 42,323,376 | 0.272 | 0.804 | 29,039  |
|    |       |            |    |            |                                                                     | MK | 44,217,038 | 44,217,183 | rs2532314  | 44,217,112 | 0.230 | 1.000 | 390,475 |
|    |       |            |    |            |                                                                     | EB | 44,253,293 | 44,253,384 | rs2532259  | 44,253,364 | 0.230 | 1.000 | 426,727 |
|    |       |            |    |            |                                                                     | EB | 44,271,327 | 44,271,746 | rs2532236  | 44,271,430 | 0.230 | 1.000 | 444,793 |
|    |       |            |    |            |                                                                     | MK | 44,271,426 | 44,271,848 | rs2532236  | 44,271,430 | 0.230 | 1.000 | 444,793 |
|    |       |            |    |            |                                                                     | MO | 44,271,954 | 44,272,323 | rs2532235  | 44,272,000 | 0.230 | 1.000 | 445,363 |
|    |       |            |    |            |                                                                     | MO | 44,271,954 | 44,272,323 | rs2532234  | 44,272,266 | 0.230 | 1.000 | 445,629 |
|    |       |            |    |            |                                                                     | MK | 44,272,445 | 44,272,713 | rs17663792 | 44,272,552 | 0.231 | 0.993 | 445,915 |
|    |       |            |    |            |                                                                     | MO | 44,272,408 | 44,272,673 | rs17663792 | 44,272,552 | 0.231 | 0.993 | 445,915 |
|    |       |            |    |            |                                                                     | MK | 44,272,445 | 44,272,713 | rs2732660  | 44,272,679 | 0.230 | 1.000 | 446,042 |
| 27 | 17q21 | rs12150672 | 17 | 43,826,637 | <i>ARHGAP27, ARL17B, C17orf69, CRHR1, SPPL2C, KANSL1, MAPT, STH</i> | MK | 44,276,225 | 44,276,411 | rs1918785  | 44,276,330 | 0.230 | 1.000 | 449,693 |
|    |       |            |    |            |                                                                     | MK | 44,280,017 | 44,280,226 | rs2732675  | 44,280,188 | 0.230 | 1.000 | 453,551 |
|    |       |            |    |            |                                                                     | MO | 44,289,093 | 44,289,164 | rs2732629  | 44,289,101 | 0.230 | 0.985 | 462,464 |
|    |       |            |    |            |                                                                     | MO | 44,289,093 | 44,289,164 | rs2732630  | 44,289,150 | 0.230 | 0.985 | 462,513 |
|    |       |            |    |            |                                                                     | EB | 43,802,643 | 43,803,150 | rs12607898 | 43,802,778 | 0.733 | 0.980 | 30,500  |
|    |       |            |    |            |                                                                     | EB | 4,457,808  | 4,458,132  | rs11670503 | 4,458,063  | 0.254 | 0.839 | 91,844  |
|    |       |            |    |            |                                                                     | EB | 13,001,484 | 13,002,038 | rs11085824 | 13,001,547 | 0.310 | 0.840 | 22,703  |
|    |       |            |    |            |                                                                     | MK | 13,001,466 | 13,002,026 | rs11085824 | 13,001,547 | 0.310 | 0.840 | 22,703  |
|    |       |            |    |            |                                                                     | MO | 13,001,382 | 13,002,002 | rs11085824 | 13,001,547 | 0.310 | 0.840 | 22,703  |
|    |       |            |    |            |                                                                     | EB | 13,030,047 | 13,030,376 | rs8113575  | 13,030,280 | 0.701 | 0.921 | 6,030   |
| 30 | 19p13 | rs741702   | 19 | 13,024,250 | <i>CALR, FARSA, SYCE2</i>                                           | MO | 13,044,538 | 13,044,646 | rs2974750  | 13,044,544 | 0.700 | 0.903 | 20,294  |
|    |       |            |    |            |                                                                     | EB | 55,990,051 | 55,990,746 | rs737092   | 55,990,405 | 0.496 | 1.000 | 0       |
| 31 | 20q13 | rs737092   | 20 | 55,990,405 | <i>RBM38</i>                                                        | EB | 55,990,051 | 55,990,746 | rs737092   | 55,990,405 | 0.496 | 1.000 | 0       |



|    |       |           |    |            |              |    |            |            |           |            |       |       |       |
|----|-------|-----------|----|------------|--------------|----|------------|------------|-----------|------------|-------|-------|-------|
| 32 | 22q12 | rs5749446 | 22 | 32,880,585 | <i>FBXO7</i> | EB | 32,887,371 | 32,887,591 | rs6518786 | 32,887,498 | 0.386 | 1.000 | 6,913 |
|    |       |           |    |            |              | EB | 32,887,371 | 32,887,591 | rs5754113 | 32,887,566 | 0.386 | 1.000 | 6,981 |

NDRs overlapping secondary SNPs at loci

|   |      |           |   |          |              |    |            |            |            |          |           |       |       |
|---|------|-----------|---|----------|--------------|----|------------|------------|------------|----------|-----------|-------|-------|
| 1 | 6p21 | rs2479720 | 6 | 41915704 | <i>CCND3</i> | EB | 41,924,851 | 41,925,202 | rs16895130 | 41924931 | 0.3042328 | 0.933 | 9,227 |
|---|------|-----------|---|----------|--------------|----|------------|------------|------------|----------|-----------|-------|-------|

---

**Supplementary Table 17.** Number and tissue distribution of NDRs identified by FAIRE-seq, using either stringent or relaxed criteria for NDR calling. The numbers of SNPs in NDR regions that are potential causal variants (defined as being either i. a sentinel SNP from the GWAS or ii. a SNP in high LG ( $r^2 > 0.8$ ) with a sentinel SNP) are shown, along with enrichment compared to expected under null hypothesis.

| Peak calling threshold <sup>a</sup> | Tissue   | NDRs   | <u>Potential causal variants</u> |          | Fold Enrichment | Binomial P (two sided)* | Bonferroni corrected P <sup>o</sup> |
|-------------------------------------|----------|--------|----------------------------------|----------|-----------------|-------------------------|-------------------------------------|
|                                     |          |        | Observed                         | Expected |                 |                         |                                     |
| <b><u>Stringent - T 8</u></b>       | EB       | 23570  | 25                               | 13.7     | 1.8             | 0.001                   | 0.007                               |
|                                     | EB/MK    | 9377   | 13                               | 5.4      | 2.4             | 0.002                   | 0.017                               |
|                                     | EB/MK/MO | 3623   | 1                                | 2.1      | 0.5             | 0.725                   | n.s.                                |
|                                     | EB/MO    | 1352   | 1                                | 0.8      | 1.3             | 0.546                   | n.s.                                |
|                                     | MK       | 35621  | 9                                | 20.7     | 0.4             | 0.001                   | 0.007                               |
|                                     | MK/MO    | 1578   | 1                                | 0.9      | 1.1             | 0.603                   | n.s.                                |
|                                     | MO       | 28187  | 10                               | 16.4     | 0.6             | 0.081                   | n.s.                                |
|                                     | All      | 103308 | 60                               |          |                 |                         |                                     |
| <b><u>Relaxed - T 6</u></b>         | EB       | 59698  | 47                               | 26.0     | 1.8             | 2.27E-5                 | 1.13E-4                             |
|                                     | EB/MK    | 27527  | 18                               | 12.0     | 1.5             | 0.09                    | n.s.                                |
|                                     | EB/MK/MO | 6913   | 3                                | 3.0      | 1.0             | 1.00                    | n.s.                                |
|                                     | EB/MO    | 4231   | 2                                | 1.8      | 1.1             | 0.71                    | n.s.                                |
|                                     | MK       | 110733 | 20                               | 48.2     | 0.4             | 8.51E-8                 | 4.26E-7                             |
|                                     | MK/MO    | 5527   | 3                                | 2.4      | 1.2             | 0.52                    | n.s.                                |
|                                     | MO       | 86252  | 38                               | 37.6     | 1.0             | 0.92                    | n.s.                                |
|                                     | All      | 300881 | 131                              |          |                 |                         |                                     |

\*Two tailed binomial tests

<sup>a</sup>The T parameter from Fseq makes reference to the number of standard deviations above the background to call a peak

<sup>o</sup>Bonferroni corrected for 7 tests.

**Supplementary Table 18.** Genes closest to an NDR containing a sentinel SNP or a SNP in high LD in erythroblasts only (see methods). For each gene, we determined the relationship of gene expression with time during erythropoiesis using linear regression, and calculated the t-statistic for the difference in beta from zero. Distance refers to the distance from the SNP to the transcription start site (TSS) of the transcript.

| SNP in NDR | Chr | Position  | Gene                 | Gene biotype         | Distance to TSS | t statistic |
|------------|-----|-----------|----------------------|----------------------|-----------------|-------------|
| rs1175550  | 1   | 3691528   | <i>RP1-286D6.2</i>   | protein_coding       | 1901            | 8.11        |
| rs4926524  | 1   | 47679258  | <i>TAL1</i>          | protein_coding       | -10490          | 5.20        |
| rs218264   | 4   | 55408875  | <i>AC006552.1</i>    | lincRNA              | -64423          | No probe    |
| rs769236   | 4   | 122745038 | <i>CCNA2</i>         | protein_coding       | -49             | 2.03        |
| rs2271176  | 4   | 122791601 | <i>BBS7</i>          | protein_coding       | -4              | 2.86        |
| rs9349205  | 6   | 41925159  | <i>CCND3</i>         | protein_coding       | 15573           | 4.20        |
| rs9389268  | 6   | 135419631 | <i>HBS1L</i>         | protein_coding       | -4563           | 1.76        |
| rs9376091  | 6   | 135419636 | <i>HBS1L</i>         | protein_coding       | -4558           | 1.76        |
| rs9402685  | 6   | 135419688 | <i>HBS1L</i>         | protein_coding       | -4506           | 1.76        |
| rs6920211  | 6   | 135431318 | <i>HBS1L</i>         | protein_coding       | 7124            | 1.76        |
| rs9494142  | 6   | 135431640 | <i>HBS1L</i>         | protein_coding       | 7446            | 1.76        |
| rs589235   | 6   | 139839960 | <i>RP11-12A2.3</i>   | lincRNA              | 45768           | No probe    |
| rs10758656 | 9   | 4852599   | <i>RP11-125K10.5</i> | processed_transcript | 2226            | No probe    |
| rs901683   | 10  | 45966422  | <i>MARCH8</i>        | protein_coding       | 7089            | 4.35        |
| rs75595592 | 10  | 46039930  | <i>MARCH8</i>        | protein_coding       | 9111            | 4.35        |
| rs2572207  | 15  | 66070693  | <i>DENND4A</i>       | protein_coding       | -13769          | 7.83        |
| rs11866877 | 16  | 170044    | <i>NPRL3</i>         | protein_coding       | 640             | 15.04       |
| rs7209801  | 17  | 42323376  | <i>AC003102.1</i>    | protein_coding       | -3860           | No probe    |
| rs2532259  | 17  | 44253364  | <i>KANSL1</i>        | protein_coding       | 3770            | -0.06       |
| rs12607898 | 18  | 43802778  | <i>C18orf25</i>      | protein_coding       | 48790           | 3.27        |
| rs11670503 | 19  | 4458063   | <i>UBXN6</i>         | protein_coding       | 272             | 4.67        |
| rs8113575  | 19  | 13030280  | <i>SYCE2</i>         | protein_coding       | 204             | -2.32       |
| rs737092   | 20  | 55990405  | <i>RBM38</i>         | protein_coding       | 23119           | 4.83        |
| rs6518786  | 22  | 32887498  | <i>FBXO7</i>         | protein_coding       | 4223            | 11.34       |
| rs5754113  | 22  | 32887566  | <i>FBXO7</i>         | protein_coding       | 4291            | 11.34       |

**Supplementary Table 19.** Bioinformatic approaches used for identification of candidate genes and overlap with blood cell phenotypes in model organisms.

| Region | Sentinel SNP | Gene             | Bioinformatic strategy |      |        |       | Phenotype in model organism |            |
|--------|--------------|------------------|------------------------|------|--------|-------|-----------------------------|------------|
|        |              |                  | Proximity              | eQTL | Coding | GRAIL | Mouse                       | Drosophila |
| 1p36   | rs1175550    | <i>CCDC27</i>    | +                      |      |        |       |                             |            |
| 1p36   | rs1175550    | <i>LRRC48</i>    | +                      |      |        |       |                             |            |
| 1p34   | rs3916164    | <i>HEYL</i>      | +                      |      |        |       |                             |            |
| 1p32   | rs741959     | <i>TAL1</i>      | +                      |      |        | +     | +                           |            |
| 1q23   | rs857684     | <i>OR10Z1</i>    | +                      |      | +      |       |                             |            |
| 1q23   | rs857684     | <i>OR6Y1</i>     |                        |      | +      |       |                             |            |
| 1q23   | rs857684     | <i>SPTA1</i>     | +                      |      | +      | +     | +                           |            |
| 1q32   | rs7529925    | <i>MIR181A1</i>  | +                      |      |        |       |                             |            |
| 1q32   | rs7551442    | <i>ATP2B4</i>    | +                      |      |        |       |                             | +          |
| 1q32   | rs9660992    | <i>TMCC2</i>     | +                      |      |        |       |                             |            |
| 1q44   | rs3811444    | <i>TRIM58</i>    | +                      |      | +      |       |                             |            |
| 2p21   | rs4953318    | <i>PRKCE</i>     | +                      |      |        |       | +                           |            |
| 2p16   | rs243070     | <i>BCL11A</i>    | +                      |      |        |       | +                           |            |
| 2q13   | rs10207392   | <i>ACOXL</i>     | +                      |      |        |       |                             |            |
| 3p24   | rs9310736    | <i>THRB</i>      | +                      |      |        |       | +                           |            |
| 3q22   | rs6776003    | <i>RASA2</i>     | +                      |      |        |       |                             |            |
| 3q23   | rs13061823   | <i>XRN1</i>      | +                      |      |        |       |                             |            |
| 3q29   | rs11717368   | <i>TFRC</i>      | +                      |      |        | +     | +                           |            |
| 4q11   | rs218238     | <i>KIT</i>       | +                      |      |        |       | +                           | +          |
| 4q27   | rs13152701   | <i>BBS7</i>      | +                      |      |        |       |                             |            |
| 4q27   | rs13152701   | <i>CCNA2</i>     | +                      | +    |        |       | +                           | +          |
| 6p23   | rs6914805    | <i>GMPR</i>      | +                      | +    |        |       |                             |            |
| 6p21   | rs1408272    | <i>HFE</i>       |                        |      | +      |       | +                           |            |
| 6p21   | rs1408272    | <i>SLC17A3</i>   | +                      |      |        |       |                             |            |
| 6p22   | rs13219787   | <i>HIST1H2AM</i> | +                      |      |        |       |                             |            |
| 6p22   | rs13219787   | <i>HIST1H2BO</i> | +                      |      |        |       |                             |            |
| 6p22   | rs13219787   | <i>HIST1H3J</i>  | +                      |      |        |       |                             |            |
|        |              | <i>TRIM39-</i>   |                        |      |        |       |                             |            |
| 6p22   | rs2097775    | <i>RPP21</i>     | +                      |      |        |       |                             |            |
| 6p21   | rs9272219    | <i>HLA-DQA1</i>  | +                      | +    | +      |       |                             |            |
| 6p21   | rs9272219    | <i>HLA-DQA2</i>  |                        | +    |        |       |                             |            |
| 6p21   | rs9349204    | <i>CCND3</i>     | +                      |      |        | +     | +                           |            |
| 6p12   | rs9369427    | <i>VEGFA</i>     | +                      |      |        |       | +                           |            |
| 6q21   | rs1008084    | <i>CCDC162P</i>  | +                      |      |        |       |                             |            |
| 6q23   | rs9389269    | <i>HBS1L</i>     | +                      |      |        |       |                             | +          |
| 6q24   | rs590856     | <i>CITED2</i>    | +                      |      |        |       | +                           |            |
| 6q26   | rs736661     | <i>QKI</i>       | +                      |      |        |       | +                           |            |
| 7p13   | rs12718598   | <i>IKZF1</i>     | +                      |      |        | +     | +                           |            |
| 7q22   | rs2075672    | <i>ACTL6B</i>    | +                      |      |        |       |                             | +          |
| 7q22   | rs2075672    | <i>TFR2</i>      | +                      |      |        |       | +                           |            |
| 7q36   | rs10480300   | <i>PRKAG2</i>    | +                      |      |        |       |                             |            |
| 8p11   | rs4737009    | <i>ANK1</i>      | +                      |      |        | +     | +                           |            |
| 8p11   | rs6987853    | <i>C8orf40</i>   | +                      | +    |        |       |                             |            |
| 9p24   | rs2236496    | <i>RCL1</i>      | +                      |      |        |       |                             |            |
| 9q34   | rs579459     | <i>ABO</i>       | +                      |      |        |       |                             |            |
| 10q11  | rs901683     | <i>MARCH8</i>    | +                      | +    | +      |       |                             |            |
| 10q22  | rs10159477   | <i>HK1</i>       | +                      |      |        |       | +                           | +          |
| 10q24  | rs11190134   | <i>NKX2-3</i>    | +                      |      |        |       | +                           |            |

| Region | Sentinel SNP | Gene            | Proximity | eQTL | Coding | GRAIL | Mouse | Drosophila |
|--------|--------------|-----------------|-----------|------|--------|-------|-------|------------|
| 11p15  | rs11042125   | <i>AKIP1</i>    | +         | +    |        |       |       |            |
| 11p15  | rs11042125   | <i>C11orf16</i> | +         | +    |        |       |       |            |
| 11p15  | rs11042125   | <i>NRIP3</i>    |           | +    |        |       |       |            |
| 11p15  | rs11042125   | <i>ST5</i>      | +         |      |        |       |       |            |
| 11p15  | rs7936461    | <i>SBF2</i>     | +         |      |        |       |       |            |
| 11q13  | rs2302264    | <i>CORO1B</i>   | +         | +    |        |       |       | +          |
| 11q13  | rs2302264    | <i>PTPRCAP</i>  | +         | +    |        |       | +     |            |
| 11q13  | rs2302264    | <i>RPS6KB2</i>  | +         | +    | +      |       |       | +          |
| 11q13  | rs7125949    | <i>ARHGEF17</i> |           | +    | +      |       |       |            |
| 11q13  | rs7125949    | <i>P2RY6</i>    | +         |      |        |       |       |            |
| 12p13  | rs7312105    | <i>CACNA1C</i>  | +         |      |        |       |       |            |
| 12p13  | rs10849023   | <i>CCND2</i>    | +         |      |        | +     | +     |            |
| 12q22  | rs11104870   | <i>KITLG</i>    | +         |      |        |       | +     |            |
| 12q24  | rs3184504    | <i>ATXN2</i>    | +         |      |        |       |       |            |
| 12q24  | rs3184504    | <i>SH2B3</i>    | +         |      | +      |       | +     |            |
| 12q24  | rs3829290    | <i>ACADS</i>    |           |      | +      |       |       |            |
| 12q24  | rs3829290    | <i>MLEC</i>     | +         |      |        |       |       |            |
| 14q23  | rs7155454    | <i>FNTB</i>     | +         |      |        |       | +     |            |
| 14q23  | rs7155454    | <i>MAX</i>      | +         |      |        |       |       |            |
| 14q24  | rs11627546   | <i>SMOC1</i>    | +         |      |        |       |       |            |
| 14q32  | rs17616316   | <i>EIF5</i>     | +         |      |        |       |       | +          |
| 15q21  | rs1532085    | <i>LIPC</i>     | +         |      |        |       |       |            |
| 15q22  | rs2572207    | <i>DENND4A</i>  | +         |      |        |       |       |            |
| 15q22  | rs2572207    | <i>PTPLAD1</i>  |           | +    |        |       |       |            |
| 15q24  | rs8028632    | <i>PPCDC</i>    | +         |      |        |       |       |            |
| 15q24  | rs8028632    | <i>SCAMP5</i>   | +         |      |        |       |       |            |
| 15q24  | rs11072566   | <i>NRG4</i>     | +         |      |        |       |       |            |
| 15q25  | rs2867932    | <i>DNAJA4</i>   |           | +    |        |       |       | +          |
| 15q25  | rs2867932    | <i>WDR61</i>    | +         |      |        |       |       | +          |
| 16p11  | rs11248850   | <i>NPRL3</i>    | +         |      |        |       |       |            |
| 16q22  | rs2271294    | <i>CTRL</i>     |           |      | +      |       |       |            |
| 16q22  | rs2271294    | <i>EDC4</i>     | +         |      |        |       |       | +          |
| 16q22  | rs2271294    | <i>NUTF2</i>    | +         |      |        |       |       |            |
| 16q22  | rs2271294    | <i>PSMB10</i>   |           |      | +      |       | +     | +          |
| 16q24  | rs10445033   | <i>PIEZO1</i>   | +         |      |        |       |       |            |
| 17p11  | rs888424     | <i>SPECC1</i>   | +         |      |        |       |       |            |
| 17q11  | rs2070265    | <i>C17orf63</i> | +         |      |        |       |       |            |
| 17q11  | rs2070265    | <i>ERAL1</i>    |           | +    |        |       |       |            |
| 17q11  | rs2070265    | <i>NEK8</i>     | +         |      |        |       |       |            |
| 17q11  | rs2070265    | <i>TRAF4</i>    | +         | +    |        |       |       |            |
| 17q12  | rs8182252    | <i>CDK12</i>    |           | +    |        |       |       |            |
| 17q12  | rs8182252    | <i>NEUROD2</i>  | +         |      |        |       |       |            |
| 17q21  | rs2269906    | <i>SLC4A1</i>   |           |      |        | +     | +     |            |
| 17q21  | rs2269906    | <i>UBTF</i>     | +         |      |        |       |       |            |
| 17q12  | rs12150672   | <i>ARHGAP27</i> |           | +    |        |       |       |            |
| 17q12  | rs12150672   | <i>ARL17B</i>   |           | +    |        |       |       |            |
| 17q12  | rs12150672   | <i>C17orf69</i> |           | +    | +      |       |       |            |
| 17q12  | rs12150672   | <i>CRHR1</i>    | +         |      | +      |       |       | +          |
| 17q12  | rs12150672   | <i>SPPL2C</i>   |           |      | +      |       |       |            |
| 17q12  | rs12150672   | <i>KANSL1</i>   |           |      | +      |       |       |            |
| 17q12  | rs12150672   | <i>MAPT</i>     |           |      | +      |       | +     |            |
| 17q12  | rs12150672   | <i>STH</i>      |           |      | +      |       |       |            |
| 17q25  | rs4969184    | <i>PGS1</i>     | +         | +    |        |       |       |            |
| 18q21  | rs4890633    | <i>C18orf25</i> | +         | +    |        |       |       |            |

| Region | Sentinel SNP | Gene           | Proximity | eQTL | Coding | GRAIL | Mouse | Drosophila |
|--------|--------------|----------------|-----------|------|--------|-------|-------|------------|
| 19p13  | rs2159213    | <i>AP3D1</i>   | +         |      |        |       | +     | +          |
| 19p13  | rs732716     | <i>MPND</i>    | +         |      |        |       |       |            |
| 19p13  | rs732716     | <i>SH3GL1</i>  | +         |      |        |       |       |            |
| 19p13  | rs732716     | <i>UBXD1</i>   |           |      | +      |       |       |            |
| 19p13  | rs741702     | <i>CALR</i>    |           | +    |        |       |       |            |
| 19p13  | rs741702     | <i>FARSA</i>   | +         | +    |        |       |       |            |
| 19p13  | rs741702     | <i>SYCE2</i>   | +         |      |        |       |       |            |
| 19q13  | rs3892630    | <i>NUDT19</i>  | +         |      | +      |       |       |            |
| 20q13  | rs737092     | <i>RBM38</i>   | +         |      |        |       |       |            |
| 21q22  | rs2032314    | <i>ATP50</i>   | +         |      |        |       |       | +          |
| 22q11  | rs5754217    | <i>UBE2L3</i>  | +         | +    |        |       |       | +          |
| 22q11  | rs5754217    | <i>YDJC</i>    |           |      | +      |       |       |            |
| 22q12  | rs5749446    | <i>FBX07</i>   | +         |      | +      | +     |       |            |
| 22q12  | rs855791     | <i>KCTD17</i>  | +         |      |        |       |       |            |
| 22q12  | rs855791     | <i>TMPRSS6</i> | +         |      | +      |       | +     |            |
| 22q13  | rs140522     | <i>ECGF1</i>   | +         | +    |        |       |       |            |
| 22q13  | rs140522     | <i>NCAPH2</i>  | +         |      |        |       | +     |            |
| 22q13  | rs140522     | <i>ODF3B</i>   | +         |      |        |       |       | +          |
| 22q13  | rs140522     | <i>SCO2</i>    | +         |      |        |       |       | +          |

**Supplementary Table 20.** Blood cell phenotypic abnormalities identified in *D. melanogaster* with RNAi silencing of orthologs for the red blood cell candidate genes. Results are provided for the ortholog with strongest phenotype: reduced cell numbers (-) or raised cell numbers (+). *Drosophila* orthologs are listed as: Flybase ID (gene name)

| Gene           | Region | <i>D.melanogaster</i> ortholog | Phenotype for RNAi knockdown of <i>D. melanogaster</i> ortholog |                          |               | Mouse phenotype |
|----------------|--------|--------------------------------|-----------------------------------------------------------------|--------------------------|---------------|-----------------|
|                |        |                                | Crystal Cells early larvae                                      | Crystal Cell late larvae | Plasmatocytes |                 |
| <i>ACTL6B</i>  | 7q22   | CG6546 ( <i>Bap55</i> )        | ++                                                              | +++                      | --            |                 |
| <i>AP3D1</i>   | 19p13  | CG10986 ( <i>garnet</i> )      | -                                                               | --                       | 0             | +               |
| <i>ATP2B4</i>  | 1q32   | CG42314 ( <i>PMCA</i> )        | -                                                               | ++                       | ++            |                 |
| <i>ATP50</i>   | 21q22  | CG4307 ( <i>Oscp</i> )         | +                                                               | +++                      | +             |                 |
| <i>CCNA2</i>   | 4q27   | CG5940 ( <i>CycA</i> )         | ++                                                              | +                        | 0             | +               |
| <i>CORO1B</i>  | 11q13  | CG9446 ( <i>coro</i> )         | --                                                              | -                        | -             |                 |
| <i>CRHR1</i>   | 17q12  | CG13758 ( <i>Pdfr</i> )        | +                                                               | +++                      | ++            |                 |
| <i>DNAJA4</i>  | 15q25  | CG8863 ( <i>Droj2</i> )        | +                                                               | ++                       | +++           |                 |
| <i>EDC4</i>    | 16q22  | CG6181 ( <i>Ge-1</i> )         | 0                                                               | -                        | ---           |                 |
| <i>EIF5</i>    | 14q32  | CG9177 ( <i>eIF5</i> )         | 0                                                               | 0                        | ---           |                 |
| <i>HBS1L</i>   | 6q23   | CG1898 ( <i>HBS1</i> )         | ++                                                              | +                        | 0             |                 |
| <i>HK1</i>     | 10q22  | CG3001 ( <i>Hex-A</i> )        | ++                                                              | +++                      | 0             | +               |
| <i>KIT</i>     | 4q11   | CG8222 ( <i>Pvr</i> )          | 0                                                               | -                        | ---           | +               |
| <i>ODF3B</i>   | 22q13  | CG8086 (-)                     | -                                                               | +                        | ---           |                 |
| <i>PSMB10</i>  | 16q22  | CG12161 ( <i>Prosβ2R2</i> )    | ++                                                              | ++                       | 0             | +               |
| <i>RPS6KB2</i> | 11q13  | CG10539 ( <i>S6K</i> )         | 0                                                               | +                        | --            |                 |
| <i>SCO2</i>    | 22q13  | CG8885 ( <i>Scox</i> )         | +                                                               | +++                      | 0             |                 |
| <i>UBE2L3</i>  | 22q11  | CG7425 ( <i>eff</i> )          | --                                                              | 0                        | ++            |                 |
| <i>WDR61</i>   | 15q25  | CG3909 (-)                     | ---                                                             | -                        | -             |                 |



**Supplementary Table 21.** Phenotypic variance explained by sentinel SNPs.

|                                              | <b>GWA<br/>cohorts</b> | <b>Non-GWA<br/>cohorts</b> | <b>Combined</b> |
|----------------------------------------------|------------------------|----------------------------|-----------------|
| <b>Sample size</b>                           | 11,898                 | 13,264                     | 25,156          |
| <b>Model 1 - Phenotype specific<br/>SNPs</b> |                        |                            |                 |
| HB                                           | 0.027                  | 0.020                      | 0.023           |
| MCH                                          | 0.077                  | 0.067                      | 0.071           |
| MCHC                                         | 0.027                  | 0.024                      | 0.025           |
| MCV                                          | 0.069                  | 0.072                      | 0.071           |
| PCV                                          | 0.026                  | 0.017                      | 0.021           |
| RBC                                          | 0.046                  | 0.038                      | 0.042           |
| <b>Model 2 - All Sentinel SNPs</b>           |                        |                            |                 |
| HB                                           | 0.044                  | 0.042                      | 0.043           |
| MCH                                          | 0.096                  | 0.084                      | 0.090           |
| MCHC                                         | 0.046                  | 0.056                      | 0.051           |
| MCV                                          | 0.084                  | 0.089                      | 0.087           |
| PCV                                          | 0.045                  | 0.039                      | 0.042           |
| RBC                                          | 0.070                  | 0.068                      | 0.069           |

**Supplementary Table 22.** Effect sizes at the 75 loci associated with red blood cell phenotypes in i. 460  $\beta$ -thalassaemia heterozygotes, and ii. 3786 controls with normal genotype from the SardinIA study.  $P_{\text{hetero}}$  is for comparison of effect size between heterozygotes and controls. Genetic loci showing heterogeneity of effect are highlighted (green:  $P < 0.05$ , yellow:  $P < 7 \times 10^{-4}$ ).

| Region | SNP        | $r^2$ * | Position  | Pheno | Gene                                  | $\beta$ -thalassaemia heterozygotes |      | Normal Controls |         | $P_{\text{hetero}}$ |
|--------|------------|---------|-----------|-------|---------------------------------------|-------------------------------------|------|-----------------|---------|---------------------|
|        |            |         |           |       |                                       | Effect                              | P    | Effect          | P       |                     |
| 1p36   | rs1175549  | 0.82    | 3681587   | MCHC  | <i>CCDC27, LRRRC48</i>                | 0.00 (0.07)                         | 1.00 | -0.08 (0.03)    | 0.02    | 0.33                |
| 1p34   | rs3916164  |         | 39842526  | MCH   | <i>HEYL</i>                           | -0.09 (0.11)                        | 0.42 | 0.01 (0.07)     | 0.93    | 0.47                |
| 1p32   | rs741959   |         | 47448820  | MCV   | <i>TAL1</i>                           | 0.24 (0.32)                         | 0.45 | 0.27 (0.17)     | 0.10    | 0.92                |
| 1p23   | rs857684   |         | 156842353 | MCHC  | <i>OR6Y1, OR10Z1, SPTA1</i>           | -0.05 (0.08)                        | 0.47 | 0.10 (0.03)     | 9.6E-04 | 0.05                |
| 1q32   | rs7529925  |         | 197273831 | RBC   | <i>MIR181A1</i>                       | -0.01 (0.05)                        | 0.88 | -0.02 (0.02)    | 0.20    | 0.83                |
| 1q32   | rs7551442  |         | 201921744 | MCHC  | <i>ATP2B4</i>                         | 0.06 (0.09)                         | 0.53 | -0.01 (0.04)    | 0.87    | 0.53                |
| 1q32   | rs9660992  |         | 203516073 | MCH   | <i>TMCC2</i>                          | -0.21 (0.11)                        | 0.04 | -0.10 (0.06)    | 0.11    | 0.34                |
| 1q44   | rs12404125 | 0.252   | 246111082 | RBC   | <i>TRIM58</i>                         | -0.01 (0.05)                        | 0.81 | 0.00 (0.01)     | 0.85    | 0.79                |
| 2p21   | rs4953318  |         | 46208555  | PCV   | <i>PRKCE</i>                          | -0.17 (0.30)                        | 0.57 | 0.14 (0.12)     | 0.22    | 0.33                |
| 2p16   | rs243070   |         | 60473790  | MCV   | <i>BCL11A</i>                         | -0.69 (0.37)                        | 0.06 | -0.29 (0.20)    | 0.14    | 0.34                |
| 2q13   | rs10207392 |         | 111566130 | MCV   | <i>ACOXL</i>                          | 0.05 (0.31)                         | 0.88 | 0.50 (0.17)     | 2.8E-03 | 0.19                |
| 3p24   | rs9310736  |         | 24325815  | MCV   | <i>THRB</i>                           | 0.03 (0.32)                         | 0.93 | 0.18 (0.16)     | 0.26    | 0.67                |
| 3q22   | rs6776003  |         | 142749183 | MCV   | <i>RASA2</i>                          | 0.04 (0.33)                         | 0.91 | 0.18 (0.16)     | 0.27    | 0.69                |
| 3q23   | rs13061823 |         | 143603476 | MCV   | <i>XRN1</i>                           | -0.51 (0.31)                        | 0.11 | -0.26 (0.16)    | 0.12    | 0.48                |
| 3q29   | rs11717368 |         | 197318754 | MCH   | <i>TFRC</i>                           | -0.02 (0.10)                        | 0.82 | 0.00 (0.06)     | 0.96    | 0.87                |
| 4q11   | rs218238   |         | 55089781  | RBC   | <i>KIT</i>                            | -0.08 (0.06)                        | 0.18 | 0.02 (0.02)     | 0.15    | 0.09                |
| 4q27   | rs13152701 |         | 122970511 | MCV   | <i>BBS7, CCNA2</i>                    | -0.36 (0.32)                        | 0.27 | 0.03 (0.17)     | 0.89    | 0.30                |
| 6p23   | rs6914805  |         | 16389166  | MCH   | <i>GMPR</i>                           | 0.11 (0.13)                         | 0.42 | 0.11 (0.08)     | 0.18    | 0.98                |
| 6q21   | rs1800562  | 0.793   | 26201120  | MCH   | <i>HFE, SLC17A3</i>                   | -0.10 (0.27)                        | 0.72 | 0.04 (0.16)     | 0.79    | 0.66                |
| 6p22   | rs13214703 | 1       | 28049366  | MCH   | <i>HIST1H2AM, HIST1H2BO, HIST1H3J</i> | 0.45 (0.24)                         | 0.05 | 0.34 (0.14)     | 0.02    | 0.66                |
| 6p22   | rs2097775  |         | 30462282  | HB    | <i>TRIM39-RPP21</i>                   | 0.15 (0.23)                         | 0.52 | -0.07 (0.08)    | 0.36    | 0.36                |
| 6p21   | rs9272219  |         | 32710247  | RBC   | <i>HLA-DQA1, HLA-DQA2</i>             | 0.01 (0.05)                         | 0.81 | 0.03 (0.01)     | 0.02    | 0.70                |
| 6p21   | rs17318575 | 0.379   | 25601217  | MCV   | <i>CCND3</i>                          | 1.36 (0.87)                         | 0.12 | 0.12 (0.41)     | 0.77    | 0.20                |

|       |            |      |           |      |                                    |              |         |              |         |         |
|-------|------------|------|-----------|------|------------------------------------|--------------|---------|--------------|---------|---------|
| 6p12  | rs9369427  |      | 43919408  | HB   | <i>VEGFA</i>                       | 0.04 (0.10)  | 0.69    | 0.09 (0.04)  | 0.03    | 0.65    |
| 6q21  | rs1008084  |      | 109733658 | MCH  | <i>CCDC162P</i>                    | -0.15 (0.10) | 0.14    | -0.08 (0.06) | 0.18    | 0.55    |
| 6q23  | rs9389269  |      | 135468852 | MCV  | <i>HBS1L</i>                       | -0.47 (0.35) | 0.18    | -0.28 (0.19) | 0.14    | 0.64    |
| 6q24  | rs590856   |      | 139886122 | MCV  | <i>CITED2</i>                      | -0.02 (0.31) | 0.94    | -0.63 (0.17) | 1.4E-04 | 0.09    |
| 6q26  | rs736661   |      | 164402826 | MCH  | <i>QKI</i>                         | 0.05 (0.10)  | 0.60    | 0.01 (0.06)  | 0.88    | 0.71    |
| 7p13  | rs12669559 | 0.61 | 50403271  | MCV  | <i>IKZF1</i>                       | 0.29 (0.41)  | 0.47    | 0.38 (0.22)  | 0.09    | 0.85    |
| 7q22  | rs2075672  |      | 100078232 | RBC  | <i>ACTL6B, TFR2</i>                | -0.08 (0.05) | 0.07    | -0.02 (0.01) | 0.10    | 0.20    |
| 7q36  | rs10480300 |      | 151036938 | HB   | <i>PRKAG2</i>                      | 0.27 (0.12)  | 0.03    | 0.10 (0.05)  | 0.02    | 0.20    |
| 8p11  | rs4737009  |      | 41749562  | MCHC | <i>ANK1</i>                        | -0.08 (0.07) | 0.30    | 0.05 (0.04)  | 0.12    | 0.11    |
| 8p11  | rs6987853  |      | 42576607  | MCHC | <i>C8orf40</i>                     | -0.02 (0.07) | 0.74    | 0.04 (0.03)  | 0.17    | 0.39    |
| 9p24  | rs2236496  |      | 4834265   | MCV  | <i>RCL1</i>                        | 0.05 (0.45)  | 0.90    | 0.13 (0.21)  | 0.56    | 0.88    |
| 9q34  | rs579459   |      | 135143989 | RBC  | <i>ABO</i>                         | 0.16 (0.05)  | 2.1E-03 | 0.03 (0.02)  | 0.06    | 0.02    |
| 10q11 | rs901683   |      | 45286428  | MCV  | <i>MARCH8</i>                      | 0.54 (0.54)  | 0.32    | -0.96 (0.28) | 5.9E-04 | 0.01    |
| 10q22 | rs10159477 |      | 70769894  | HB   | <i>HK1</i>                         | -0.03 (0.15) | 0.84    | -0.04 (0.05) | 0.48    | 0.95    |
| 10q22 | rs11190134 |      | 101272190 | MCH  | <i>NKX2-3</i>                      | -0.09 (0.11) | 0.40    | 0.05 (0.06)  | 0.45    | 0.26    |
| 11p15 | rs11042125 |      | 8894625   | HB   | <i>AKIP1, C11orf16, NRIP3, ST5</i> | 0.05 (0.12)  | 0.66    | 0.11 (0.05)  | 0.02    | 0.64    |
| 11p15 | rs7936461  |      | 9997462   | PCV  | <i>SBF2</i>                        | 0.84 (0.39)  | 0.03    | 0.17 (0.15)  | 0.24    | 0.11    |
| 11q13 | rs2302264  |      | 66964002  | MCV  | <i>CORO1B, PTPRCAP, RPS6KB2</i>    | -0.28 (0.32) | 0.39    | 0.41 (0.17)  | 0.02    | 0.06    |
| 11q13 | rs7125949  |      | 72686732  | HB   | <i>ARHGEF17, P2RY6</i>             | -0.22 (0.17) | 0.22    | -0.26 (0.08) | 4.5E-04 | 0.80    |
| 12p13 | rs7312107  | 1    | 2393631   | PCV  | <i>CACNA1C</i>                     | -0.03 (0.37) | 0.93    | -0.08 (0.13) | 0.56    | 0.91    |
| 12p13 | rs10849023 |      | 4202739   | MCH  | <i>CCND2</i>                       | 0.06 (0.11)  | 0.56    | -0.11 (0.06) | 0.09    | 0.17    |
| 12q22 | rs11104870 |      | 87353425  | RBC  | <i>KITLG</i>                       | 0.02 (0.05)  | 0.66    | -0.01 (0.02) | 0.52    | 0.53    |
| 12q24 | rs3184504  |      | 110368991 | HB   | <i>ATXN2, SH2B3</i>                | -0.06 (0.09) | 0.55    | -0.09 (0.04) | 0.03    | 0.74    |
| 12q24 | rs3829290  |      | 119610821 | MCV  | <i>ACADS, MLEC</i>                 | -0.07 (0.30) | 0.82    | 0.15 (0.16)  | 0.37    | 0.53    |
| 14q24 | rs11627546 |      | 69435677  | MCV  | <i>SMOC1</i>                       | 0.50 (0.36)  | 0.17    | 0.25 (0.19)  | 0.19    | 0.55    |
| 14q32 | rs7155454  |      | 64571992  | MCH  | <i>FNTB, MAX</i>                   | -0.09 (0.10) | 0.37    | -0.04 (0.06) | 0.51    | 0.68    |
| 14q32 | rs17616316 |      | 102892515 | MCH  | <i>EIF5</i>                        | -1.37 (0.29) | 3.0E-06 | -0.12 (0.21) | 0.56    | 5.3E-04 |
| 15q21 | rs1532085  |      | 56470658  | HB   | <i>LIPC</i>                        | 0.02 (0.10)  | 0.82    | 0.03 (0.04)  | 0.37    | 0.91    |
| 15q22 | rs2572207  |      | 63857747  | MCV  | <i>DENND4A, PTPLAD1</i>            | 0.30 (0.33)  | 0.36    | 0.18 (0.17)  | 0.30    | 0.74    |
| 15q24 | rs8028632  |      | 73108315  | MCV  | <i>PPCDC, SCAMP5</i>               | 0.44 (0.32)  | 0.17    | 0.12 (0.18)  | 0.50    | 0.38    |
| 15q24 | rs2867932  |      | 76378092  | MCHC | <i>DNAJA4, WDR61</i>               | -0.04 (0.07) | 0.62    | -0.06 (0.03) | 0.05    | 0.72    |

|       |                        |                    |          |      |                                                                     |              |      |              |         |      |
|-------|------------------------|--------------------|----------|------|---------------------------------------------------------------------|--------------|------|--------------|---------|------|
| 15q25 | rs11072566             |                    | 74081026 | HB   | <i>NRG4</i>                                                         | -0.05 (0.09) | 0.59 | 0.04 (0.04)  | 0.33    | 0.38 |
| 16p11 | rs11248850             |                    | 103598   | MCH  | <i>NPRL3</i>                                                        | 0.14 (0.11)  | 0.20 | -0.19 (0.06) | 2.5E-03 | 0.01 |
| 16q22 | rs2271294              |                    | 66459827 | RBC  | <i>CTRL, EDC4, NUTF2, PSMB10</i>                                    | -0.11 (0.05) | 0.05 | 0.00 (0.02)  | 0.87    | 0.05 |
| 16q24 | rs9933309              | 0.711              | 87372433 | MCHC | <i>PIEZO1</i>                                                       | -0.13 (0.08) | 0.11 | -0.08 (0.04) | 0.03    | 0.57 |
| 17p11 | rs888424               |                    | 19926019 | MCH  | <i>SPECC1</i>                                                       | -0.02 (0.10) | 0.86 | -0.07 (0.06) | 0.26    | 0.67 |
| 17q11 | rs2070265              |                    | 24099550 | MCH  | <i>C17orf63, ERAL1, NEK8, NEK8, TRAF4</i>                           | -0.33 (0.18) | 0.06 | -0.19 (0.10) | 0.05    | 0.46 |
| 17q12 | rs8182252              |                    | 34981476 | RBC  | <i>CDK12, NEUROD2</i>                                               | -0.08 (0.05) | 0.07 | -0.01 (0.01) | 0.33    | 0.15 |
| 17q21 | rs2269906              |                    | 39649863 | MCHC | <i>SLC4A1, UBTF</i>                                                 | -0.11 (0.08) | 0.14 | -0.04 (0.03) | 0.24    | 0.38 |
| 17q21 | rs12150672             |                    | 41182408 | RBC  | <i>ARHGAP27, ARL17B, C17orf69, CRHR1, SPPL2C, KANSL1, MAPT, STH</i> | -0.03 (0.05) | 0.53 | 0.00 (0.01)  | 0.87    | 0.58 |
| 17q25 | rs4969184              |                    | 73905008 | HB   | <i>PGS1</i>                                                         | -0.01 (0.09) | 0.89 | 0.15 (0.04)  | 1.6E-04 | 0.11 |
| 18q21 | rs4890633              |                    | 42087276 | MCH  | <i>C18orf25</i>                                                     | -0.12 (0.13) | 0.36 | -0.20 (0.08) | 0.01    | 0.60 |
| 19p13 | rs2159213              |                    | 2087102  | HB   | <i>AP3D1</i>                                                        | 0.13 (0.09)  | 0.14 | -0.03 (0.04) | 0.43    | 0.09 |
| 19p13 | rs732716               |                    | 4317219  | MCV  | <i>MPND, SH3GL1, UBXN6</i>                                          | 0.42 (0.31)  | 0.17 | 0.35 (0.17)  | 0.03    | 0.84 |
| 19p13 | rs741702               |                    | 12885250 | MCH  | <i>CALR, FARSA, SYCE2</i>                                           | -0.01 (0.11) | 0.95 | -0.13 (0.07) | 0.08    | 0.37 |
| 19q13 | rs3892630              |                    | 37873324 | MCV  | <i>NUDT19</i>                                                       | -0.12 (0.39) | 0.75 | -0.50 (0.22) | 0.03    | 0.41 |
| 20q13 | rs99595                | 0.561              | 55423214 | MCV  | <i>RBM38</i>                                                        | 0.69 (0.29)  | 0.02 | 0.30 (0.16)  | 0.06    | 0.25 |
| 21q22 | rs2032314              |                    | 34276393 | PCV  | <i>ATP50</i>                                                        | -0.18 (0.42) | 0.68 | -0.40 (0.16) | 0.01    | 0.62 |
| 22q11 | rs5754217              |                    | 20269675 | MCV  | <i>UBE2L3, YDJC</i>                                                 | 0.04 (0.43)  | 0.93 | -0.06 (0.23) | 0.79    | 0.84 |
| 22q12 | rs5749446              |                    | 31210585 | MCH  | <i>FBXO7</i>                                                        | 0.08 (0.11)  | 0.45 | 0.17 (0.07)  | 0.01    | 0.52 |
| 22q12 | rs2413450 <sup>§</sup> | 0.867 <sup>*</sup> | 35800170 | MCH  | <i>KCTD17, TMPRSS6</i>                                              | 0.02 (0.13)  | 0.87 | -0.18 (0.09) | 0.04    | 0.20 |
| 22q13 | rs470119 <sup>§</sup>  | 0.669 <sup>*</sup> | 49313780 | MCV  | <i>T YMP, NCAPH2, ODF3B, SCO2</i>                                   | 0.39 (0.42)  | 0.35 | 0.31 (0.23)  | 0.17    | 0.14 |

**Supplementary Table 23.** Effect sizes in South Asians (SA) at the novel loci associated with red blood cell phenotypes amongst Europeans (EW) in the current GWA study.  $P_{\text{hetero}}$  is the P values for comparison of effect size between Europeans and South Asians. Dir: is direction of effect between Europeans and South Asians (+ is concordant, - is discordant). Blank cells represent genotypes not available in South Asians.

| Region | SNP        | Pheno | Alleles |     | EAF  |      | N     | Europeans      |          | South Asians |                |         | $P_{\text{hetero}}$ | Dir |
|--------|------------|-------|---------|-----|------|------|-------|----------------|----------|--------------|----------------|---------|---------------------|-----|
|        |            |       | Effect  | Alt | EW   | SA   |       | Effect         | P        | N            | Effect         | P       |                     |     |
| 1p36   | rs1175550  | MCHC  | G       | A   | 0.22 |      | 50425 | 0.008 (0.013)  | 8.6E-15  |              |                |         |                     |     |
| 1p32   | rs741959   | MCV   | G       | A   | 0.57 |      | 58002 | 0.157 (0.025)  | 6.0E-10  |              |                |         |                     |     |
| 1q23   | rs857684   | MCHC  | C       | T   | 0.74 | 0.81 | 56373 | -0.006 (0.011) | 3.5E-16  | 7953         | 0.019 (0.021)  | 4.1E-01 | 3.1E-01             | -   |
| 1q32   | rs7529925  | RBC   | C       | T   | 0.28 | 0.28 | 53258 | 0.014 (0.002)  | 8.3E-09  | 7912         | -0.003 (0.008) | 8.2E-01 | 5.0E-02             | -   |
| 1q32   | rs7551442  | MCHC  | A       | G   | 0.09 |      | 50411 | -0.023 (0.017) | 9.7E-12  |              |                |         |                     |     |
| 1q32   | rs9660992  | MCH   | G       | A   | 0.42 | 0.17 | 51249 | 0.007 (0.004)  | 7.1E-10  | 8126         | 0.012 (0.043)  | 7.8E-01 | 8.9E-01             | +   |
| 1q44   | rs3811444  | RBC   | T       | C   | 0.35 | 0.34 | 34323 | 0.018 (0.003)  | 4.5E-10  | 7365         | -0.001 (0.008) | 9.8E-01 | 3.1E-02             | -   |
| 2p21   | rs4953318  | PCV   | A       | C   | 0.62 | 0.63 | 53032 | 0.152 (0.018)  | 3.1E-19  | 7941         | 0.287 (0.058)  | 6.7E-07 | 2.4E-02             | +   |
| 2p16   | rs243070   | MCV   | T       | A   | 0.72 |      | 57740 | -0.181 (0.027) | 4.4E-13  |              |                |         |                     |     |
| 2q13   | rs10207392 | MCV   | G       | A   | 0.44 | 0.48 | 57750 | -0.132 (0.025) | 2.0E-08  | 8485         | -0.182 (0.082) | 2.6E-02 | 5.6E-01             | +   |
| 3p24   | rs9310736  | MCV   | A       | G   | 0.35 | 0.33 | 57810 | -0.210 (0.026) | 6.1E-16  | 8485         | -0.248 (0.089) | 5.2E-03 | 6.8E-01             | +   |
| 3q22   | rs6776003  | MCV   | A       | G   | 0.44 |      | 54586 | -0.138 (0.026) | 7.1E-08  |              |                |         |                     |     |
| 3q23   | rs13061823 | MCV   | T       | C   | 0.56 | 0.39 | 57678 | -0.168 (0.025) | 4.7E-13  | 9081         | -0.081 (0.080) | 3.2E-01 | 3.0E-01             | +   |
| 3q29   | rs11717368 | MCH   | C       | G   | 0.52 | 0.50 | 51664 | 0.008 (0.004)  | 6.6E-19  | 7533         | 0.036 (0.034)  | 2.9E-01 | 4.2E-01             | +   |
| 4q11   | rs218238   | RBC   | A       | T   | 0.78 | 0.66 | 53374 | 0.033 (0.003)  | 2.8E-39  | 7912         | 0.042 (0.008)  | 1.1E-07 | 2.9E-01             | +   |
| 4q27   | rs13152701 | MCV   | A       | G   | 0.37 | 0.33 | 53708 | 0.150 (0.026)  | 9.0E-10  | 9081         | 0.066 (0.082)  | 4.2E-01 | 3.3E-01             | +   |
| 6p23   | rs6914805  | MCH   | C       | T   | 0.75 | 0.59 | 47195 | 0.012 (0.004)  | 1.2E-19  | 8126         | 0.053 (0.033)  | 1.2E-01 | 2.2E-01             | +   |
| 6p21   | rs1408272  | MCH   | G       | T   | 0.07 |      | 36605 | 0.033 (0.009)  | 4.8E-67  |              |                |         |                     |     |
| 6p22   | rs13219787 | MCH   | A       | G   | 0.09 |      | 42060 | 0.023 (0.007)  | 5.9E-17  |              |                |         |                     |     |
| 6p22   | rs2097775  | HB    | A       | T   | 0.15 | 0.07 | 61058 | 0.055 (0.008)  | 1.3E-10  | 9213         | -0.047 (0.037) | 2.6E-01 | 7.2E-03             | -   |
| 6p21   | rs9272219  | RBC   | G       | T   | 0.72 | 0.70 | 49302 | 0.015 (0.002)  | 4.3E-10  | 7365         | -0.005 (0.008) | 6.0E-01 | 2.8E-02             | -   |
| 6p21   | rs9349204  | MCV   | G       | A   | 0.27 | 0.19 | 53153 | -0.367 (0.028) | 2.4E-40  | 9081         | -0.291 (0.103) | 4.3E-03 | 4.7E-01             | +   |
| 6p12   | rs9369427  | HB    | A       | C   | 0.68 | 0.78 | 60855 | 0.042 (0.006)  | 5.6E-12  | 8605         | 0.043 (0.024)  | 6.0E-02 | 9.7E-01             | +   |
| 6q21   | rs1008084  | MCH   | G       | A   | 0.56 | 0.73 | 51455 | -0.010 (0.003) | 6.4E-26  | 8126         | -0.064 (0.037) | 1.1E-01 | 1.5E-01             | +   |
| 6q23   | rs9389269  | MCV   | T       | C   | 0.72 | 0.87 | 57855 | -0.600 (0.028) | 2.6E-109 | 9081         | -0.662 (0.117) | 2.8E-08 | 6.1E-01             | +   |
| 6q24   | rs590856   | MCV   | G       | A   | 0.43 | 0.34 | 58041 | 0.313 (0.026)  | 5.0E-36  | 9081         | 0.399 (0.088)  | 7.9E-06 | 3.5E-01             | +   |

|       |            |      |   |   |      |      |       |                |         |      |                |         |         |   |
|-------|------------|------|---|---|------|------|-------|----------------|---------|------|----------------|---------|---------|---|
| 6q26  | rs736661   | MCH  | A | G | 0.62 | 0.59 | 51397 | 0.007 (0.004)  | 1.6E-11 | 8126 | 0.065 (0.033)  | 6.6E-02 | 8.1E-02 | + |
| 7p13  | rs12718598 | MCV  | T | C | 0.51 | 0.51 | 37967 | -0.204 (0.030) | 1.6E-13 | 8485 | -0.237 (0.082) | 4.4E-03 | 7.1E-01 | + |
| 7q22  | rs2075672  | RBC  | A | G | 0.39 |      | 41805 | 0.022 (0.003)  | 1.9E-20 |      |                |         |         |   |
| 7q36  | rs10480300 | HB   | C | T | 0.72 |      | 49771 | 0.052 (0.007)  | 7.8E-15 |      |                |         |         |   |
| 8p11  | rs4737009  | MCHC | G | A | 0.74 | 0.79 | 54462 | -0.014 (0.013) | 4.9E-11 | 7409 | 0.042 (0.026)  | 1.2E-01 | 5.6E-02 | - |
| 8p11  | rs6987853  | MCHC | C | T | 0.62 | 0.71 | 52954 | -0.002 (0.010) | 6.1E-11 | 5376 | 0.043 (0.024)  | 7.8E-02 | 8.5E-02 | - |
| 9p24  | rs2236496  | MCV  | C | T | 0.22 | 0.19 | 53761 | -0.279 (0.031) | 1.4E-19 | 9081 | -0.225 (0.100) | 2.6E-02 | 6.0E-01 | + |
| 9q34  | rs579459   | RBC  | T | C | 0.80 | 0.83 | 53362 | 0.021 (0.003)  | 9.3E-18 | 7365 | 0.036 (0.010)  | 6.2E-04 | 1.5E-01 | + |
| 10q11 | rs901683   | MCV  | A | G | 0.08 | 0.03 | 58051 | 0.364 (0.050)  | 1.5E-16 | 9081 | 0.408 (0.256)  | 1.1E-01 | 8.7E-01 | + |
| 10q22 | rs10159477 | HB   | A | G | 0.16 |      | 45553 | 0.087 (0.010)  | 4.4E-20 |      |                |         |         |   |
| 10q24 | rs11190134 | MCH  | G | A | 0.60 | 0.63 | 51412 | -0.011 (0.004) | 7.9E-08 | 8126 | -0.003 (0.034) | 9.3E-01 | 8.2E-01 | + |
| 11p15 | rs11042125 | HB   | A | T | 0.60 | 0.73 | 60973 | 0.032 (0.006)  | 1.5E-09 | 9213 | 0.020 (0.021)  | 3.6E-01 | 5.6E-01 | + |
| 11p15 | rs7936461  | PCV  | C | T | 0.75 |      | 49357 | 0.121 (0.021)  | 1.0E-09 |      |                |         |         |   |
| 11q13 | rs2302264  | MCV  | G | A | 0.58 | 0.71 | 57841 | 0.140 (0.025)  | 1.3E-10 | 9081 | 0.010 (0.087)  | 8.8E-01 | 1.5E-01 | + |
| 11q13 | rs7125949  | HB   | A | G | 0.11 |      | 49153 | 0.053 (0.010)  | 2.1E-09 |      |                |         |         |   |
| 12p13 | rs7312105  | PCV  | G | A | 0.36 | 0.38 | 48278 | 0.104 (0.019)  | 3.2E-08 | 7941 | 0.107 (0.057)  | 6.3E-02 | 9.6E-01 | + |
| 12p13 | rs10849023 | MCH  | C | T | 0.79 | 0.86 | 42647 | -0.008 (0.005) | 7.5E-12 | 7533 | -0.043 (0.049) | 3.8E-01 | 4.7E-01 | + |
| 12q22 | rs11104870 | RBC  | C | T | 0.30 | 0.29 | 53326 | 0.013 (0.002)  | 1.7E-08 | 7912 | 0.002 (0.008)  | 8.2E-01 | 2.2E-01 | + |
| 12q24 | rs3184504  | HB   | T | C | 0.48 |      | 56784 | 0.051 (0.006)  | 4.3E-19 |      |                |         |         |   |
| 12q24 | rs3829290  | MCV  | C | T | 0.44 | 0.65 | 51911 | -0.153 (0.026) | 2.1E-09 | 8485 | -0.247 (0.089) | 5.5E-03 | 3.1E-01 | + |
| 14q23 | rs7155454  | MCH  | A | G | 0.51 | 0.47 | 51228 | 0.002 (0.004)  | 1.8E-12 | 8126 | -0.001 (0.033) | 9.7E-01 | 9.4E-01 | - |
| 14q24 | rs11627546 | MCV  | C | A | 0.84 | 0.79 | 57833 | 0.162 (0.032)  | 3.6E-08 | 9081 | 0.022 (0.098)  | 8.2E-01 | 1.8E-01 | + |
| 15q22 | rs2572207  | MCV  | C | T | 0.74 | 0.60 | 57810 | 0.153 (0.029)  | 3.4E-09 | 9081 | 0.080 (0.081)  | 3.1E-01 | 4.0E-01 | + |
| 15q24 | rs8028632  | MCV  | T | C | 0.80 | 0.45 | 53602 | 0.188 (0.032)  | 6.9E-10 | 9081 | 0.063 (0.079)  | 4.4E-01 | 1.4E-01 | + |
| 15q24 | rs11072566 | HB   | A | G | 0.48 | 0.33 | 60792 | 0.028 (0.006)  | 8.3E-08 | 9213 | 0.000 (0.019)  | 9.9E-01 | 1.5E-01 | + |
| 15q25 | rs2867932  | MCHC | G | A | 0.61 | 0.54 | 56211 | -0.021 (0.010) | 3.3E-09 | 7953 | -0.008 (0.017) | 5.9E-01 | 5.0E-01 | + |
| 16p11 | rs11248850 | MCH  | G | A | 0.50 | 0.60 | 51345 | 0.007 (0.004)  | 6.3E-23 | 8126 | 0.023 (0.033)  | 5.0E-01 | 6.4E-01 | + |
| 16q22 | rs2271294  | RBC  | T | A | 0.15 | 0.23 | 53599 | 0.017 (0.003)  | 1.1E-09 | 7912 | 0.005 (0.008)  | 5.5E-01 | 2.0E-01 | + |
| 16q24 | rs10445033 | MCHC | G | A | 0.37 | 0.36 | 42050 | 0.020 (0.012)  | 1.5E-22 | 7409 | 0.053 (0.019)  | 5.1E-03 | 1.4E-01 | + |
| 17p11 | rs888424   | MCH  | A | G | 0.43 | 0.31 | 51274 | 0.006 (0.004)  | 5.4E-20 | 8126 | 0.108 (0.034)  | 1.4E-03 | 3.0E-03 | + |
| 17q11 | rs2070265  | MCH  | T | C | 0.20 | 0.30 | 51503 | 0.013 (0.004)  | 5.1E-14 | 8126 | 0.006 (0.034)  | 8.2E-01 | 8.5E-01 | + |
| 17q12 | rs8182252  | RBC  | C | T | 0.18 | 0.10 | 49812 | 0.016 (0.003)  | 5.9E-09 | 5340 | 0.009 (0.015)  | 5.5E-01 | 6.6E-01 | + |

|       |            |      |   |   |      |      |       |               |         |      |                |         |         |   |
|-------|------------|------|---|---|------|------|-------|---------------|---------|------|----------------|---------|---------|---|
| 17q21 | rs2269906  | MCHC | C | A | 0.36 | 0.30 | 56263 | 0.027 (0.010) | 2.0E-11 | 7409 | 0.027 (0.020)  | 1.8E-01 | 9.9E-01 | + |
| 17q21 | rs12150672 | RBC  | A | G | 0.23 |      | 53489 | 0.017 (0.003) | 4.7E-12 |      |                |         |         |   |
| 17q25 | rs4969184  | HB   | G | A | 0.53 | 0.58 | 60892 | 0.031 (0.006) | 7.0E-09 | 9213 | 0.029 (0.018)  | 1.3E-01 | 9.4E-01 | + |
| 18q21 | rs4890633  | MCH  | G | A | 0.27 | 0.33 | 51375 | 0.005 (0.004) | 1.9E-23 | 8126 | 0.133 (0.034)  | 7.6E-05 | 1.7E-04 | + |
| 19p13 | rs2159213  | HB   | C | T | 0.50 | 0.41 | 60826 | 0.032 (0.006) | 1.9E-09 | 9213 | 0.049 (0.019)  | 9.3E-03 | 3.8E-01 | + |
| 19p13 | rs732716   | MCV  | A | G | 0.71 | 0.73 | 58044 | 0.201 (0.028) | 1.5E-14 | 8485 | 0.200 (0.106)  | 6.5E-02 | 9.9E-01 | + |
| 19p13 | rs741702   | MCH  | A | C | 0.35 | 0.29 | 45178 | 0.006 (0.004) | 8.2E-20 | 8126 | 0.077 (0.035)  | 2.4E-02 | 4.1E-02 | + |
| 19q13 | rs3892630  | MCV  | T | C | 0.18 | 0.14 | 57699 | 0.176 (0.034) | 8.8E-08 | 9081 | -0.007 (0.122) | 9.6E-01 | 1.5E-01 | - |
| 20q13 | rs737092   | MCV  | C | T | 0.49 | 0.34 | 35156 | 0.216 (0.033) | 4.0E-13 | 8485 | 0.265 (0.100)  | 8.5E-03 | 6.4E-01 | + |
| 22q11 | rs5754217  | MCV  | G | T | 0.83 | 0.63 | 53759 | 0.194 (0.031) | 8.6E-10 | 9081 | 0.223 (0.081)  | 7.8E-03 | 7.4E-01 | + |
| 22q12 | rs5749446  | MCH  | T | C | 0.62 | 0.55 | 51609 | 0.007 (0.004) | 3.3E-13 | 8126 | 0.046 (0.032)  | 1.5E-01 | 2.2E-01 | + |
| 22q12 | rs855791   | MCH  | G | A | 0.57 | 0.47 | 38547 | 0.012 (0.004) | 1.0E-69 | 8126 | 0.230 (0.032)  | 5.4E-13 | 1.3E-11 | + |
| 22q13 | rs140522   | MCV  | C | T | 0.67 | 0.70 | 44680 | 0.287 (0.030) | 4.5E-23 | 9081 | 0.179 (0.086)  | 4.0E-02 | 2.4E-01 | + |

**Supplementary Table 24.** Pearson correlation coefficients between phenotypic traits (amongst LOLIPOP EW sample, shaded orange) and SNP associations ( $-\log_{10}[P]$  in the European analysis, shaded lilac)

|             | <b>Hb</b> | <b>MCH</b> | <b>MCHC</b> | <b>MCV</b> | <b>PCV</b> | <b>RBC</b> |
|-------------|-----------|------------|-------------|------------|------------|------------|
| <b>Hb</b>   |           | 0.23       | 0.08        | 0.22       | 0.96       | 0.75       |
| <b>MCH</b>  | 0.14      |            | 0.46        | 0.91       | 0.09       | 0.47       |
| <b>MCHC</b> | 0.14      | 0.32       |             | 0.07       | 0.21       | 0.25       |
| <b>MCV</b>  | 0.16      | 0.79       | 0.22        |            | 0.20       | 0.42       |
| <b>PCV</b>  | 0.72      | 0.25       | 0.19        | 0.23       |            | 0.80       |
| <b>RBC</b>  | 0.37      | 0.54       | 0.20        | 0.51       | 0.55       |            |



**Supplementary Table 25.** Results of permutation testing to determine the effective number phenotypes studied. The genome-wide association study for association of SNPs with red blood cell traits was run repeatedly with the relationship of genotype and phenotype data randomised to simulate expectations under the null hypothesis. On each run, the minimum P value ( $P_{\min}$ ) for association with any phenotype was determined for each SNP, and the number of SNPs with  $P_{\min}$  reaching suggestive statistical significance determined ( $P < 10^{-6}$ ,  $P < 10^{-7}$ ,  $P < 5 \times 10^{-8}$ ). First the GWAS was run 100 times, with the phenotype data structure intact, to assess the number of associations expected under the null hypothesis for 6 related phenotypes (“Related”). The GWAS was then run a further 100 times, with the phenotype data for the six red blood cell traits now also randomised, to assess the number of associations expected under the null hypothesis for 6 unrelated phenotypes (“Unrelated”). Effective number of phenotypes was calculated as the ratio of SNPs reaching statistical significance under the null hypothesis for related vs unrelated phenotypes multiplied by the actual number of phenotypes studied (6). Permutation testing was carried out amongst both Europeans and South Asians separately.

| P value threshold        | Number of SNPs      |                        | Related / Unrelated | Effective number of phenotypes |
|--------------------------|---------------------|------------------------|---------------------|--------------------------------|
|                          | Related phenotypes* | Unrelated phenotypes † |                     |                                |
| <b>Europeans</b>         |                     |                        |                     |                                |
| $P < 1.0 \times 10^{-6}$ | 1705                | 1983                   | 0.86                | 5.16                           |
| $P < 1.0 \times 10^{-7}$ | 235                 | 255                    | 0.92                | 5.53                           |
| $P < 5.0 \times 10^{-8}$ | 128                 | 152                    | 0.84                | 5.05                           |
| <b>South Asians</b>      |                     |                        |                     |                                |
| $P < 1.0 \times 10^{-6}$ | 1217                | 1347                   | 0.90                | 5.42                           |
| $P < 1.0 \times 10^{-7}$ | 104                 | 129                    | 0.81                | 4.84                           |
| $P < 5.0 \times 10^{-8}$ | 62                  | 75                     | 0.83                | 4.96                           |

\* Related: GWAS for the six red cell phenotypes with correlation matrix intact

† Unrelated: GWAS for the six red cell phenotypes rendered unrelated by randomisation

**Supplementary Table 26.** Results of replication testing. SNPs that do not show replication ( $P > 0.05$  in the replication sample, or  $P > 1 \times 10^{-8}$  in combined analysis) are shaded grey.

| Region                                                                       | SNP        | Position  | Pheno | GWA   |         | Replication |          | Combined |         |
|------------------------------------------------------------------------------|------------|-----------|-------|-------|---------|-------------|----------|----------|---------|
|                                                                              |            |           |       | N     | P       | N           | P        | N        | P       |
| <b>Sentinel SNPs at loci identified in GWA of Europeans</b>                  |            |           |       |       |         |             |          |          |         |
| 1p36                                                                         | rs6656196  | 26631360  | MCV   | 57813 | 2.9E-08 | 34798       | 2.0E-01  | 92611    | 2.5E-07 |
| 2q13                                                                         | rs10207392 | 111566130 | MCV   | 57750 | 2.0E-08 | 46743       | 3.1E-04  | 104493   | 4.4E-11 |
| 3p25                                                                         | rs17040409 | 14879731  | HB    | 60821 | 4.3E-08 | 34830       | 5.8E-01  | 95651    | 5.5E-05 |
| 3p24                                                                         | rs6770091  | 23529811  | HB    | 60884 | 4.7E-08 | 63147       | 1.25E-01 | 124031   | 1.9E-06 |
| 3q22                                                                         | rs6776003  | 142749183 | MCV   | 54586 | 7.1E-08 | 46695       | 9.0E-05  | 101281   | 3.7E-11 |
| 3q25                                                                         | rs919520   | 158019813 | RBC   | 52971 | 3.2E-08 | 53201       | 3.85E-02 | 106172   | 6.6E-03 |
| 4q21                                                                         | rs236996   | 88224227  | HB    | 56729 | 1.5E-08 | 55004       | 1.7E-02  | 111733   | 1.1E-08 |
| 6p21                                                                         | rs9380238  | 31375597  | MCH   | 51449 | 2.8E-08 | 34798       | 3.4E-01  | 86247    | 9.9E-07 |
| 10q24                                                                        | rs11190134 | 101272190 | MCH   | 51412 | 7.9E-08 | 34798       | 3.4E-04  | 86210    | 1.3E-10 |
| 12p13                                                                        | rs7312105  | 2393616   | PCV   | 48278 | 3.2E-08 | 45711       | 5.0E-03  | 93989    | 3.2E-09 |
| 12q22                                                                        | rs11104870 | 87353425  | RBC   | 53326 | 1.7E-08 | 33079       | 6.5E-04  | 86405    | 6.2E-11 |
| 14q23                                                                        | rs1256061  | 63773346  | PCV   | 43992 | 9.0E-08 | 54922       | 3.4E-02  | 98914    | 2.7E-07 |
| 14q24                                                                        | rs11627546 | 69435677  | MCV   | 57833 | 3.6E-08 | 46758       | 2.9E-03  | 104591   | 1.1E-09 |
| 15q24                                                                        | rs11072566 | 74081026  | HB    | 60792 | 8.3E-08 | 54910       | 4.6E-04  | 115702   | 3.0E-10 |
| 16p11                                                                        | rs13708    | 30908310  | RBC   | 53602 | 2.2E-08 | 33079       | 4.3E-01  | 86681    | 1.0E-06 |
| 19q13                                                                        | rs3892630  | 37873324  | MCV   | 57699 | 8.8E-08 | 46780       | 2.0E-04  | 104479   | 1.0E-10 |
| 22q12                                                                        | rs695267   | 27229748  | RBC   | 48988 | 8.4E-08 | 33079       | 6.9E-01  | 82067    | 1.1E-05 |
| <b>Sentinel SNPs at loci identified in GWA of Europeans and South Asians</b> |            |           |       |       |         |             |          |          |         |
| 1p34                                                                         | rs3916164  | 39842526  | MCH   | 57076 | 7.4E-08 | 34798       | 8.5E-04  | 91874    | 3.1E-10 |
| 7q33                                                                         | rs12530845 | 134980518 | MCH   | 57204 | 6.6E-08 | 37687       | 3.0E-02  | 94891    | 2.7E-08 |
| 14q32                                                                        | rs17616316 | 102892515 | MCH   | 55633 | 1.6E-08 | 34798       | 8.7E-04  | 90431    | 8.2E-11 |
| 15q21                                                                        | rs1532085  | 56470658  | HB    | 46598 | 2.9E-09 | 34830       | 1.8E-03  | 81428    | 6.7E-11 |
| 21q22                                                                        | rs2032314  | 34276393  | PCV   | 56362 | 5.4E-08 | 54944       | 1.1E-03  | 111306   | 7.5E-10 |
| <b>SNPs tested for association with secondary phenotypes</b>                 |            |           |       |       |         |             |          |          |         |
| 4q21                                                                         | rs6840258  | 88192692  | MCH   | 51387 | 6.5E-08 | 46776       | 1.9E-03  | 98163    | 1.4E-09 |
| 6p23                                                                         | rs6914805  | 16389166  | MCHC  | 50304 | 5.8E-08 | 34800       | 7.4E-08  | 85104    | 2.7E-14 |
| 6p22                                                                         | rs13219787 | 27969649  | HB    | 51167 | 1.1E-08 | 34800       | 1.3E-06  | 85967    | 6.9E-14 |
| 6p21                                                                         | rs2853925  | 31372901  | RBC   | 49019 | 3.0E-08 | 33079       | 2.4E-05  | 82098    | 3.4E-12 |
| 6p21                                                                         | rs9272219  | 32710247  | HB    | 55108 | 4.1E-08 | 34800       | 2.5E-02  | 89908    | 1.2E-08 |
| 6q21                                                                         | rs1341271  | 109724235 | MCHC  | 56228 | 8.9E-08 | 34829       | 5.0E-06  | 91057    | 2.1E-12 |
| 7p13                                                                         | rs12718598 | 50395939  | MCH   | 34731 | 7.2E-08 | 34800       | 8.3E-08  | 69531    | 3.0E-14 |
| 7q22                                                                         | rs1734910  | 100147480 | PCV   | 36374 | 5.4E-08 | 34843       | 4.8E-11  | 71217    | 2.1E-17 |
| 10q22                                                                        | rs10159477 | 70769894  | RBC   | 40764 | 2.8E-08 | 0           | **       | 40764    | 2.8E-08 |
| 12p13                                                                        | rs2239063  | 2382092   | HB    | 61102 | 5.8E-08 | 34830       | 4.2E-01  | 95932    | 1.4E-06 |
| 12p13                                                                        | rs11611647 | 4204180   | RBC   | 44531 | 1.2E-08 | 33079       | 1.9E-04  | 77610    | 1.4E-11 |
| 12q24                                                                        | rs7976497  | 119619850 | RBC   | 49164 | 8.1E-08 | 33079       | 8.8E-02  | 82243    | 1.7E-07 |
| 14q23                                                                        | rs7155454  | 64571992  | MCV   | 57632 | 1.9E-08 | 34800       | 3.8E-07  | 92432    | 4.2E-14 |
| 15q22                                                                        | rs2572207  | 63857747  | MCH   | 51408 | 1.2E-08 | 34798       | 1.0E-09  | 86206    | 1.1E-16 |
| 16p11                                                                        | rs743725   | 76888     | RBC   | 47164 | 1.8E-08 | 33079       | 2.7E-01  | 80243    | 5.3E-07 |

|       |            |          |      |       |         |       |         |       |         |
|-------|------------|----------|------|-------|---------|-------|---------|-------|---------|
| 16p11 | rs11248914 | 233563   | MCHC | 52056 | 3.1E-08 | 34800 | 3.3E-12 | 86856 | 3.5E-18 |
| 17q11 | rs7221773  | 24227014 | MCHC | 56113 | 3.8E-08 | 34829 | 2.5E-05 | 90942 | 4.2E-12 |
| 19p13 | rs12982593 | 2126891  | RBC  | 48723 | 2.5E-08 | 33079 | 1.5E-04 | 81802 | 2.0E-11 |
| 21q22 | rs11910015 | 34260508 | HB   | 61233 | 6.3E-08 | 34830 | 2.6E-05 | 96063 | 7.2E-12 |

**SNPs tested as secondary signals with primary phenotype**

|       |            |           |      |       |         |       |         |        |         |
|-------|------------|-----------|------|-------|---------|-------|---------|--------|---------|
| 2p21  | rs10184620 | 46212039  | PCV  | 37432 | 9.9E-08 | 34843 | 3.7E-11 | 72275  | 3.5E-17 |
| 3q29  | rs7625441  | 197338676 | MCH  | 34728 | 4.2E-08 | 46305 | 4.7E-06 | 81033  | 1.8E-12 |
| 4q11  | rs17084315 | 54981597  | MCV  | 57857 | 2.9E-08 | 34798 | 9.7E-10 | 92655  | 4.3E-16 |
| 6p21  | rs1034050  | 25600343  | MCV  | 53730 | 5.5E-08 | 46788 | 5.4E-03 | 100518 | 4.3E-09 |
| 6p21  | rs13203202 | 25690750  | HB   | 48931 | 2.0E-08 | 34830 | 9.9E-06 | 83761  | 9.5E-13 |
| 6p21  | rs10946795 | 25822718  | MCH  | 51345 | 5.1E-08 | 46770 | 6.5E-05 | 98115  | 2.1E-11 |
| 6p21  | rs501220   | 25981004  | MCH  | 51453 | 3.2E-08 | 34798 | 8.7E-06 | 86251  | 1.3E-12 |
| 6p21  | rs10484440 | 26561721  | MCH  | 47036 | 1.8E-08 | 34798 | 2.4E-05 | 81834  | 2.2E-12 |
| 6p21  | rs2395033  | 31566533  | RBC  | 49163 | 5.4E-08 | 33079 | 1.6E-01 | 82242  | 3.5E-07 |
| 6p21  | rs9368716  | 32414068  | RBC  | 53502 | 3.4E-08 | 45000 | 4.9E-03 | 98502  | 2.4E-09 |
| 6q21  | rs12214121 | 109429247 | MCH  | 51003 | 8.8E-08 | 34798 | 3.7E-06 | 85801  | 1.5E-12 |
| 6q21  | rs12528712 | 109767577 | MCH  | 51633 | 7.4E-08 | 46772 | 3.8E-03 | 98405  | 3.8E-09 |
| 6q21  | rs12181780 | 109816229 | MCH  | 51456 | 5.5E-08 | 37671 | 5.7E-04 | 89127  | 1.9E-10 |
| 6q21  | rs12206574 | 110174466 | RBC  | 49292 | 1.1E-08 | 33079 | 8.6E-07 | 82371  | 4.7E-14 |
| 6q23  | rs1074849  | 135465105 | PCV  | 52677 | 6.2E-08 | 34843 | 6.2E-06 | 87520  | 1.8E-12 |
| 16q24 | rs750739   | 87335109  | MCHC | 41399 | 2.1E-08 | 46869 | 7.0E-03 | 88268  | 6.5E-09 |
| 22q12 | rs7291067  | 31203496  | MCH  | 47384 | 5.0E-08 | 34798 | 6.1E-10 | 82182  | 3.2E-16 |
| 22q12 | rs1421312  | 35817756  | MCHC | 46284 | 8.5E-08 | 34800 | 7.2E-17 | 81084  | 1.9E-21 |
| 22q12 | rs733655   | 35824997  | PCV  | 48127 | 3.7E-08 | 34800 | 3.8E-02 | 82927  | 3.1E-08 |

**Supplementary Table 27.** Results of the Drosophila RNAi screen. Gene: candidate gene from GWAS; Flybase Gene ID: unique ID in Flybase for the *D. melanogaster* ortholog; VDRC stock no: unique ID in the Vienna Drosophila RNAi Center (VDRC) for the *D. melanogaster* ortholog stock; Construct ID: unique ID in VDRC for the RNAi construct; Specificity score (S19): measure of RNAi specificity for ortholog gene sequence; Cell counts: score for cell count number (mean of two experiments, 15 larvae per experiment, scale -3 to +3); Highest Abs(score): absolute value of greatest departure from zero for any cell type. Fly lines with Highest Abs(score)≥2.0 are highlighted in grey.

| Gene            | Flybase Gene ID | VDRC stock no | Construct ID | Specificity score (S19) | Crystal cell early L3 | Crystal cell late L3 | Plasmat ocytes | Highest Abs(score) |
|-----------------|-----------------|---------------|--------------|-------------------------|-----------------------|----------------------|----------------|--------------------|
| ACADS           | CG4860          | 34899         | 11451        | 1.00                    | 0.0                   | -1.0                 | 0.0            | 1.0                |
| ACADS           | CG4860          | 34900         | 11451        | 1.00                    | 0.5                   | 0.0                  | 0.0            | 0.5                |
| ACADS           | CG4703          | 110335        | 100761       | 1.00                    | 0.0                   | 0.0                  | 0.0            | 0.0                |
| ACTL6B          | CG6546          | 24703         | 11955        | 1.00                    | 2.0                   | 2.5                  | -2.0           | 2.5                |
| ACTL6B          | CG6546          | 24704         | 11955        | 1.00                    | 0.5                   | 1.5                  | 0.0            | 1.5                |
| ANK1            | CG32373         | 101586        | 103913       | 1.00                    | 0.0                   | 0.0                  | 0.0            | 0.0                |
| ANK1            | CG32373         | 5115          | 2354         | 1.00                    | 0.0                   | 0.0                  | 0.5            | 0.5                |
| ANK1            | CG42734         | 46225         | 16285        | 0.99                    | -1.0                  | 0.0                  | 0.0            | 1.0                |
| ANK1            | CG42734         | 46224         | 16285        | 0.99                    | 0.5                   | 0.0                  | 0.0            | 0.5                |
| ANK1            | CG42734         | 40638         | 12247        | 0.99                    | 0.0                   | 0.0                  | 0.0            | 0.0                |
| ANK1            | CG42734         | 107238        | 104937       | 1.00                    | 0.0                   | 0.0                  | 0.0            | 0.0                |
| ANK1            | CG42734         | 26122         | 10869        | 1.00                    | 0.0                   | 0.0                  | 0.0            | 0.0                |
| ANK1            | CG42734         | 26121         | 10869        | 1.00                    | 0.0                   | 0.0                  | 0.0            | 0.0                |
| ANK1            | CG42734         | 104833        | 113612       | 1.00                    | 0.0                   | 0.0                  | 0.0            | 0.0                |
| ANK1            | CG42734         | 107369        | 106729       | 1.00                    | 0.0                   | 0.0                  | 0.0            | 0.0                |
| ANK1            | CG1651          | 25946         | 10431        | 1.00                    | 0.0                   | 0.0                  | 0.0            | 0.0                |
| ANK1            | CG1651          | 25945         | 10431        | 1.00                    | 0.0                   | 0.0                  | 0.0            | 0.0                |
| AP3D1           | CG10986         | 39766         | 7158         | 1.00                    | -0.5                  | -2.0                 | 0.0            | 2.0                |
| AP3D1           | CG10986         | 41369         | 6405         | 1.00                    | 0.0                   | 0.0                  | -0.5           | 0.5                |
| AP3D1           | CG10986         | 31390         | 7158         | 1.00                    | 0.0                   | 0.5                  | 0.0            | 0.5                |
| AP3D1           | CG10986         | 31391         | 7158         | 1.00                    | 0.0                   | 0.0                  | 0.0            | 0.0                |
| AP3D1           | CG10986         | 41368         | 6405         | 1.00                    | 0.0                   | 0.0                  | 0.0            | 0.0                |
| ARHGEF17        | CG43102         | 110150        | 102017       | 1.00                    | 0.0                   | 1.5                  | 0.0            | 1.5                |
| ARHGEF17        | CG43102         | 49053         | 17115        | 1.00                    | 1.0                   | 0.0                  | 0.0            | 1.0                |
| ARHGEF17        | CG43102         | 13094         | 5178         | 1.00                    | 0.0                   | 0.0                  | 0.0            | 0.0                |
| ARHGEF17        | CG43102         | 13429         | 5178         | 1.00                    | 0.0                   | 0.0                  | 0.0            | 0.0                |
| ARL17B          | CG2219          | 41691         | 9755         | 1.00                    | 0.5                   | 0.0                  | 0.5            | 0.5                |
| ARL17B          | CG2219          | 107995        | 100576       | 1.00                    | 0.0                   | 0.0                  | 0.0            | 0.0                |
| ARL17B          | CG2219          | 41690         | 9755         | 1.00                    | 0.0                   | 0.0                  | 0.0            | 0.0                |
| ATP2B4          | CG42314         | 101743        | 108105       | 1.00                    | -1.0                  | 2.0                  | 2.0            | 2.0                |
| ATP2B4          | CG42314         | 109188        | 116060       | 1.00                    | -2.0                  | -1.0                 | 0.0            | 2.0                |
| ATP2B4          | CG42314         | 30203         | 3152         | 1.00                    | 0.0                   | 0.0                  | 0.0            | 0.0                |
| ATP50           | CG4307          | 12792         | 4768         | 1.00                    | 0.5                   | 2.5                  | 0.5            | 2.5                |
| ATP50           | CG4307          | 12792         | 4768         | 1.00                    | 0.0                   | 2.5                  | 1.5            | 2.5                |
| ATP50           | CG4307          | 106753        | 107798       | 1.00                    | 1.0                   | 1.5                  | 0.0            | 1.5                |
| ATP50           | CG4307          | 12794         | 4768         | 1.00                    | 1.0                   | 1.0                  | -0.5           | 1.0                |
| ATP50           | CG4307          | 12794         | 4768         | 1.00                    | 0.5                   | 2.5                  | 1.0            | 2.5                |
| ATP50           | CG4307          | 106753        | 107798       | 1.00                    | 0.0                   | 1.5                  | -1.0           | 1.5                |
| ATXN2           | CG5166          | 34955         | 11562        | 0.98                    | 1.5                   | 1.0                  | 0.0            | 1.5                |
| ATXN2           | CG5166          | 34956         | 11562        | 0.98                    | 0.0                   | 0.0                  | 0.0            | 0.0                |
| BCL11A          | CG9650          | 104402        | 108364       | 1.00                    | 0.0                   | 0.0                  | 0.0            | 0.0                |
| CACNA1C         | CG43368         | 48092         | 15820        | 1.00                    | 0.0                   | 0.0                  | -0.5           | 0.5                |
| CACNA1C         | CG4894          | 52644         | 1737         | 1.00                    | -0.5                  | 0.5                  | 0.0            | 0.5                |
| CACNA1C         | CG4894          | 51490         | 1737         | 1.00                    | 0.0                   | -0.5                 | 0.0            | 0.5                |
| CACNA1C         | CG43368         | 104168        | 101478       | 1.00                    | 0.5                   | 0.0                  | 0.0            | 0.5                |
| CACNA1C         | CG43368         | 5551          | 3326         | 0.99                    | 0.0                   | 0.0                  | 0.0            | 0.0                |
| CACNA1C         | CG43368         | 43368         | 15341        | 1.00                    | 0.0                   | 0.0                  | 0.0            | 0.0                |
| CACNA1C         | CG43368         | 48093         | 15820        | 1.00                    | 0.0                   | 0.0                  | 0.0            | 0.0                |
| CACNA1C         | CG4894          | 51491         | 1737         | 1.00                    | 0.0                   | 0.0                  | 0.0            | 0.0                |
| CALR            | CG9429          | 51272         | 4328         | 1.00                    | 0.0                   | 1.0                  | 0.0            | 1.0                |
| CCNA2           | CG5940          | 32421         | 8653         | 1.00                    | 0.0                   | 0.0                  | 0.0            | 0.0                |
| CCNA2           | CG5940          | 103595        | 101548       | 1.00                    | 2.0                   | 1.0                  | 0.0            | 2.0                |
| CCND2,<br>CCND3 | CG9096          | 105361        | 108447       | 1.00                    | 0.0                   | 0.0                  | -1.0           | 1.0                |
| CORO1B          | CG9446          | 109644        | 101987       | 1.00                    | -2.0                  | -1.0                 | -0.5           | 2.0                |
| CRHR1           | CG8422          | 110708        | 108591       | 1.00                    | -1.0                  | 0.5                  | -1.5           | 1.5                |

| Gene    | Flybase Gene ID | VDRG stock no | Construct ID | Specificity score (S19) | Crystal cell early L3 | Crystal cell late L3 | Plasmat ocytes | Highest Abs(score) |
|---------|-----------------|---------------|--------------|-------------------------|-----------------------|----------------------|----------------|--------------------|
| CRHR1   | CG13758         | 106381        | 110677       | 1.00                    | 0.5                   | 2.5                  | 2.0            | 2.5                |
| CRHR1   | CG13758         | 42724         | 712          | 1.00                    | 0.0                   | 0.0                  | 0.0            | 0.0                |
| CRHR1   | CG12370         | 43314         | 15731        | 1.00                    | 0.0                   | -1.0                 | 0.0            | 1.0                |
| CRHR1   | CG12370         | 109558        | 115681       | 1.00                    | 1.0                   | 1.0                  | 0.0            | 1.0                |
| CRHR1   | CG12370         | 102292        | 111461       | 1.00                    | 0.0                   | 0.0                  | 0.0            | 0.0                |
| CDK12   | CG7597          | 25508         | 9926         | 0.97                    | 0.0                   | 0.0                  | 0.0            | 0.0                |
| CTRL    | CG15002         | 32263         | 6002         | 0.99                    | 0.0                   | 1.0                  | 1.5            | 1.5                |
| CTRL    | CG15002         | 103955        | 103120       | 1.00                    | 0.0                   | 0.0                  | 0.0            | 0.0                |
| DENND4A | CG12737         | 24602         | 7816         | 0.97                    | 0.0                   | 0.0                  | 0.0            | 0.0                |
| DENND4A | CG12737         | 24604         | 7816         | 0.97                    | 0.0                   | 0.0                  | 0.0            | 0.0                |
| DNAJA4  | CG8863          | 23638         | 14050        | 1.00                    | 0.0                   | 0.0                  | 2.0            | 2.0                |
| DNAJA4  | CG8863          | 104880        | 107834       | 1.00                    | 1.0                   | 2.0                  | 2.5            | 2.5                |
| DUS2L   | CG1434          | 30996         | 6424         | 1.00                    | 0.0                   | 1.0                  | 0.0            | 1.0                |
| DUS2L   | CG1434          | 30994         | 6424         | 1.00                    | 0.0                   | 0.0                  | -1.0           | 1.0                |
| DUS2L   | CG1434          | 104876        | 107816       | 1.00                    | 0.0                   | 0.0                  | -0.5           | 0.5                |
| EDC4    | CG6181          | 37945         | 5260         | 0.92                    | 0.0                   | -0.5                 | -2.5           | 2.5                |
| EDC4    | CG6181          | 37946         | 5260         | 0.92                    | 0.0                   | 1.0                  | 0.0            | 1.0                |
| EDC4    | CG6181          | 106687        | 102275       | 1.00                    | 1.0                   | 0.0                  | 0.0            | 1.0                |
| EIF5    | CG9177          | 105992        | 102299       | 0.98                    | 0.0                   | 1.0                  | 2.0            | 2.0                |
| EIF5    | CG9177          | 29070         | 14146        | 0.98                    | 0.0                   | 0.0                  | -2.5           | 2.5                |
| EIF5    | CG9177          | 29070         | 14146        | 0.98                    | 0.0                   | 0.0                  | -1.0           | 1.0                |
| EIF5    | CG9177          | 29071         | 14146        | 0.98                    | 0.0                   | 1.0                  | 0.5            | 1.0                |
| EIF5    | CG9177          | 105992        | 102299       | 0.98                    | -1.0                  | 1.0                  | 0.5            | 1.0                |
| ERAL1   | CG7488          | 106677        | 101760       | 1.00                    | 0.0                   | 0.0                  | 0.0            | 0.0                |
| PIEZO1  | CG8486          | 2796          | 993          | 1.00                    | 0.0                   | 0.0                  | 0.0            | 0.0                |
| PIEZO1  | CG8486          | 105132        | 101815       | 1.00                    | 0.0                   | 0.0                  | 0.0            | 0.0                |
| PIEZO1  | CG40188         | 109995        | 115662       | 1.00                    | 0.0                   | 0.0                  | 0.0            | 0.0                |
| FARSA   | CG2263          | 33515         | 9769         | 0.98                    | 0.0                   | 0.0                  | 0.0            | 0.0                |
| FARSA   | CG2263          | 33514         | 9769         | 0.98                    | 0.0                   | 0.0                  | 0.0            | 0.0                |
| FNTB    | CG17565         | 32952         | 9415         | 1.00                    | 0.0                   | -1.0                 | 0.0            | 1.0                |
| FNTB    | CG17565         | 32951         | 9415         | 1.00                    | 0.0                   | 0.5                  | 0.5            | 0.5                |
| FNTB    | CG17565         | 110646        | 108342       | 1.00                    | 0.0                   | 0.0                  | 0.0            | 0.0                |
| HBS1L   | CG1898          | 33419         | 9671         | 0.99                    | 0.0                   | -1.0                 | -1.5           | 1.5                |
| HBS1L   | CG1898          | 104327        | 107532       | 1.00                    | 2.0                   | 1.0                  | 0.0            | 2.0                |
| HBS1L   | CG1898          | 33420         | 9671         | 0.99                    | 0.0                   | 1.0                  | -0.5           | 1.0                |
| HEYL    | CG11194         | 103570        | 101381       | 1.00                    | 0.5                   | 1.0                  | 0.0            | 1.0                |
| HK1     | CG3001          | 104680        | 100831       | 1.00                    | 2.0                   | 2.5                  | 0.0            | 2.5                |
| HK1     | CG3001          | 21054         | 9964         | 0.99                    | -0.5                  | -1.0                 | 0.5            | 1.0                |
| HK1     | CG32849         | 47331         | 11656        | 0.99                    | 0.5                   | 0.5                  | 0.0            | 0.5                |
| HK1     | CG33102         | 46574         | 11655        | 1.00                    | 0.0                   | -0.5                 | 0.0            | 0.5                |
| HK1     | CG8094          | 35337         | 12378        | 1.00                    | 0.0                   | 0.0                  | 0.5            | 0.5                |
| HK1     | CG33102         | 46573         | 11655        | 1.00                    | -0.5                  | 0.0                  | 0.0            | 0.5                |
| HK1     | CG8094          | 35338         | 12378        | 1.00                    | 0.0                   | 0.0                  | -0.5           | 0.5                |
| KCTD17  | CG32810         | 108816        | 108908       | 0.99                    | 0.0                   | 0.5                  | 0.0            | 0.5                |
| KCTD17  | CG32810         | 18225         | 7621         | 1.00                    | 0.0                   | 0.0                  | 0.0            | 0.0                |
| KIT     | CG8222          | 43461         | 14375        | 1.00                    | 0.0                   | -1.0                 | -3.0           | 3.0                |
| KIT     | CG8222          | 13502         | 2571         | 1.00                    | 0.0                   | 0.0                  | -3.0           | 3.0                |
| KIT     | CG8222          | 43459         | 14375        | 1.00                    | 0.0                   | 0.0                  | -2.0           | 2.0                |
| KIT     | CG8222          | 13503         | 2571         | 1.00                    | 1.0                   | 0.0                  | -1.0           | 1.0                |
| KIT     | CG8222          | 43461         | 14375        | 1.00                    | 0.0                   | -0.5                 | -2.0           | 2.0                |
| KIT     | CG8222          | 105353        | 101575       | 1.00                    | 0.0                   | 1.0                  | -1.0           | 1.0                |
| KIT     | CG8222          | 977           | 75           | 1.00                    | 0.0                   | -0.5                 | -1.5           | 1.5                |
| KIT     | CG8222          | 105353        | 101575       | 1.00                    | 0.0                   | 1.0                  | 0.0            | 1.0                |
| KIT     | CG8222          | 43459         | 14375        | 1.00                    | 1.0                   | 0.0                  | -0.5           | 1.0                |
| KIT     | CG8222          | 13503         | 2571         | 1.00                    | 0.5                   | 0.5                  | 0.0            | 0.5                |
| KIT     | CG8222          | 977           | 75           | 1.00                    | 0.0                   | 0.0                  | 0.0            | 0.0                |
| LRRC48  | CG40440         | 109257        | 116234       | 1.00                    | 1.5                   | 0.5                  | 0.0            | 1.5                |
| MAPT    | CG31057         | 25023         | 8682         | 1.00                    | 0.0                   | 0.5                  | 0.0            | 0.5                |
| MAPT    | CG31057         | 101386        | 109359       | 1.00                    | 0.0                   | 0.0                  | 0.0            | 0.0                |
| MAPT    | CG31057         | 25024         | 8682         | 1.00                    | 0.0                   | 0.0                  | 0.0            | 0.0                |
| MARCH8  | CG4080          | 9026          | 2389         | 1.00                    | 0.0                   | -1.0                 | 0.0            | 1.0                |
| MARCH8  | CG4080          | 101426        | 109126       | 1.00                    | 0.0                   | 0.0                  | 0.0            | 0.0                |
| MAX     | CG9648          | 110332        | 100742       | 1.00                    | 0.0                   | 0.0                  | 0.0            | 0.0                |
| MLEC    | CG9257          | 103425        | 100869       | 1.00                    | 0.0                   | 1.0                  | 0.0            | 1.0                |
| MLEC    | CG9257          | 6406          | 1795         | 1.00                    | 0.5                   | 0.0                  | 0.0            | 0.5                |
| MPND    | CG4751          | 45530         | 11417        | 1.00                    | 0.0                   | 1.0                  | 0.0            | 1.0                |
| MPND    | CG4751          | 26623         | 11417        | 1.00                    | 0.0                   | 0.5                  | -0.5           | 0.5                |

| Gene    | Flybase Gene ID | VDRG stock no | Construct ID | Specificity score (S19) | Crystal cell early L3 | Crystal cell late L3 | Plasmatocytes | Highest Abs(score) |
|---------|-----------------|---------------|--------------|-------------------------|-----------------------|----------------------|---------------|--------------------|
| NEK8    | CG10951         | 100823        | 102962       | 1.00                    | 0.0                   | 0.0                  | 0.0           | 0.0                |
| NEK8    | CG10951         | 16121         | 7142         | 1.00                    | 0.0                   | 0.0                  | 0.0           | 0.0                |
| NEK8    | CG10951         | 16120         | 7142         | 1.00                    | 0.0                   | 0.0                  | 0.0           | 0.0                |
| NEUROD2 | CG7508          | 48675         | 16434        | 1.00                    | 0.5                   | 0.0                  | 0.0           | 0.5                |
| NEUROD2 | CG7508          | 2924          | 1379         | 1.00                    | 0.5                   | 0.5                  | 0.0           | 0.5                |
| NKX2-3  | CG7895          | 12656         | 4155         | 1.00                    | 0.0                   | 0.0                  | -1.5          | 1.5                |
| NKX2-3  | CG7895          | 12655         | 4155         | 1.00                    | 0.0                   | 0.0                  | 0.0           | 0.0                |
| NKX2-3  | CG7895          | 101825        | 109830       | 0.97                    | 1.0                   | 0.0                  | 1.0           | 1.0                |
| NKX2-3  | CG7895          | 32510         | 4155         | 1.00                    | 0.0                   | 0.0                  | 0.0           | 0.0                |
| NPRL3   | CG8783          | 40720         | 14027        | 1.00                    | 1.0                   | 0.0                  | 0.0           | 1.0                |
| NPRL3   | CG8783          | 40721         | 14027        | 1.00                    | 0.0                   | 1.0                  | 0.0           | 1.0                |
| NUDT19  | CG10194         | 41171         | 4939         | 1.00                    | 1.0                   | -0.5                 | 0.0           | 1.0                |
| NUDT19  | CG10194         | 107721        | 102407       | 1.00                    | 0.5                   | 0.0                  | 0.0           | 0.5                |
| NUDT19  | CG10195         | 109468        | 104676       | 1.00                    | 0.0                   | 0.5                  | 0.0           | 0.5                |
| NUDT19  | CG10194         | 41170         | 4939         | 1.00                    | 0.5                   | 0.0                  | 0.0           | 0.5                |
| NUDT19  | CG18094         | 100138        | 104998       | 1.00                    | 0.0                   | 0.0                  | 0.0           | 0.0                |
| NUDT19  | CG10195         | 26771         | 12581        | 1.00                    | 0.0                   | 0.0                  | 0.0           | 0.0                |
| NUDT19  | CG18094         | 40126         | 9510         | 1.00                    | 0.0                   | 0.0                  | 0.0           | 0.0                |
| NUTF2   | CG10174         | 109227        | 116168       | 1.00                    | 0.0                   | 0.0                  | 0.0           | 0.0                |
| NUTF2   | CG1740          | 110108        | 114962       | 1.00                    | 0.0                   | 0.0                  | 0.0           | 0.0                |
| ODF3B   | CG8086          | 23028         | 12374        | 1.00                    | -0.5                  | 1.0                  | -2.0          | 2.0                |
| ODF3B   | CG8086          | 23027         | 12374        | 1.00                    | 0.0                   | 1.0                  | -2.0          | 2.0                |
| ODF3B   | CG8086          | 24225         | 13829        | 1.00                    | -1.0                  | 0.0                  | -1.5          | 1.5                |
| ODF3B   | CG8086          | 24226         | 13829        | 1.00                    | 0.0                   | 0.0                  | 0.0           | 0.0                |
| PGS1    | CG7718          | 25532         | 9946         | 1.00                    | -1.0                  | -1.5                 | 0.0           | 1.5                |
| PGS1    | CG7718          | 109405        | 100360       | 1.00                    | 0.0                   | 1.0                  | 0.0           | 1.0                |
| PPCDC   | CG30290         | 41564         | 8674         | 0.94                    | 0.0                   | 1.0                  | -0.5          | 1.0                |
| PPCDC   | CG30290         | 41565         | 8674         | 0.94                    | 0.0                   | 0.0                  | -0.5          | 0.5                |
| PPCDC   | CG30290         | 104495        | 109377       | 1.00                    | 1.5                   | 1.0                  | -1.5          | 1.5                |
| PPCDC   | CG30290         | 49962         | 16798        | 1.00                    | 0.5                   | 0.5                  | 0.0           | 0.5                |
| PRKCE   | CG1954          | 108151        | 107658       | 0.99                    | 0.0                   | 1.0                  | 0.0           | 1.0                |
| PRKCE   | CG1954          | 33434         | 9685         | 0.99                    | 0.0                   | 1.0                  | 0.5           | 1.0                |
| PSMB10  | CG18341         | 52475         | 9563         | 1.00                    | 0.0                   | 0.0                  | 1.0           | 1.0                |
| PSMB10  | CG12161         | 103323        | 112887       | 1.00                    | 1.5                   | 2.0                  | 0.0           | 2.0                |
| PSMB10  | CG18341         | 108141        | 106009       | 1.00                    | 1.0                   | 0.5                  | 0.0           | 1.0                |
| PSMB10  | CG12161         | 31669         | 7509         | 1.00                    | 0.0                   | 0.0                  | 0.5           | 0.5                |
| PSMB10  | CG3329          | 24749         | 10938        | 1.00                    | 0.0                   | 0.0                  | 0.0           | 0.0                |
| PSMB10  | CG3329          | 103575        | 101430       | 1.00                    | 0.0                   | 0.0                  | 0.0           | 0.0                |
| PTPLAD1 | CG9267          | 101546        | 109012       | 1.00                    | 0.5                   | 0.0                  | 0.0           | 0.5                |
| PTPLAD1 | CG6746          | 46513         | 1093         | 1.00                    | 0.0                   | 0.0                  | 0.0           | 0.0                |
| QKI     | CG10293         | 100775        | 108558       | 1.00                    | 0.0                   | 0.0                  | 0.0           | 0.0                |
| RASA2   | CG6721          | 23016         | 12823        | 0.99                    | 0.0                   | -1.0                 | 0.0           | 1.0                |
| RASA2   | CG6721          | 23017         | 12823        | 0.99                    | 0.0                   | 0.0                  | 0.0           | 0.0                |
| RASA2   | CG6721          | 105383        | 100364       | 1.00                    | 0.0                   | 0.0                  | 0.0           | 0.0                |
| RPS6KB2 | CG10539         | 104369        | 107986       | 0.99                    | 0.0                   | 0.5                  | -2.0          | 2.0                |
| SBF2    | CG3632          | 26254         | 11033        | 1.00                    | 0.0                   | 0.5                  | 0.0           | 0.5                |
| SBF2    | CG3632          | 110167        | 102173       | 1.00                    | 0.0                   | 0.0                  | 0.0           | 0.0                |
| SBF2    | CG6939          | 22317         | 12081        | 1.00                    | 0.0                   | 0.0                  | 1.0           | 1.0                |
| SCAMP5  | CG9195          | 9130          | 3371         | 1.00                    | 0.0                   | 0.5                  | 0.0           | 0.5                |
| SCO2    | CG8885          | 100005        | 102902       | 1.00                    | 0.0                   | 0.0                  | 0.0           | 0.0                |
| SCO2    | CG8885          | 7861          | 898          | 1.00                    | 0.0                   | 2.0                  | -1.0          | 2.0                |
| SCO2    | CG8885          | 7860          | 898          | 1.00                    | 1.0                   | 2.5                  | 0.0           | 2.5                |
| SH2B3   | CG17367         | 103646        | 105731       | 1.00                    | 1.0                   | 1.0                  | 0.0           | 1.0                |
| SH2B3   | CG17367         | 32892         | 9362         | 1.00                    | 0.0                   | 0.0                  | 0.0           | 0.0                |
| SLC4A1  | CG8177          | 109594        | 100095       | 1.00                    | 1.0                   | 1.0                  | 0.0           | 1.0                |
| SMOC1   | CG2264          | 106494        | 108507       | 1.00                    | 1.0                   | 0.0                  | 0.0           | 1.0                |
| SPECC1  | CG13366         | 108092        | 101059       | 1.00                    | -1.0                  | -1.0                 | -1.0          | 1.0                |
| SPECC1  | CG13366         | 29606         | 14994        | 1.00                    | 0.0                   | 0.0                  | -1.0          | 1.0                |
| SPTA1   | CG1977          | 110417        | 101541       | 1.00                    | 0.0                   | 0.0                  | 0.0           | 0.0                |
| ST5     | CG18659         | 104988        | 107808       | 1.00                    | 0.0                   | 0.0                  | 0.5           | 0.5                |
| TAL1    | CG2655          | 30564         | 4356         | 1.00                    | 1.0                   | 0.5                  | 0.5           | 1.0                |
| TAL1    | CG2655          | 104381        | 108076       | 1.00                    | 0.0                   | 0.0                  | 0.0           | 0.0                |
| TMCC2   | CG1021          | 109620        | 101382       | 1.00                    | 1.0                   | 0.5                  | 0.0           | 1.0                |
| TMCC2   | CG1021          | 37336         | 2834         | 1.00                    | 0.0                   | 0.0                  | 0.0           | 0.0                |
| TRAF4   | CG3048          | 110766        | 107398       | 1.00                    | 0.0                   | 0.0                  | 0.5           | 0.5                |
| UBE2L3  | CG7425          | 110767        | 107438       | 0.97                    | -2.0                  | 0.0                  | -2.0          | 2.0                |
| UBE2L3  | CG7425          | 110767        | 107438       | 0.97                    | -1.0                  | -2.0                 | -1.5          | 2.0                |

| <b>Gene</b>   | <b>Flybase Gene ID</b> | <b>VDRG stock no</b> | <b>Construct ID</b> | <b>Specificity score (S19)</b> | <b>Crystal cell early L3</b> | <b>Crystal cell late L3</b> | <b>Plasmat ocytes</b> | <b>Highest Abs(score)</b> |
|---------------|------------------------|----------------------|---------------------|--------------------------------|------------------------------|-----------------------------|-----------------------|---------------------------|
| <i>UBE2L3</i> | CG7425                 | 105731               | 107993              | 1.00                           | -1.0                         | 1.0                         | -1.0                  | 1.0                       |
| <i>UBE2L3</i> | CG7425                 | 26011                | 10600               | 1.00                           | 0.0                          | 0.0                         | 0.0                   | 0.0                       |
| <i>UBE2L3</i> | CG7425                 | 26011                | 10600               | 1.00                           | 0.0                          | -0.5                        | -2.0                  | 2.0                       |
| <i>UBE2L3</i> | CG5788                 | 100570               | 108273              | 1.00                           | 0.0                          | 1.0                         | 0.0                   | 1.0                       |
| <i>UBE2L3</i> | CG7425                 | 26012                | 10600               | 1.00                           | 0.0                          | 0.0                         | 0.5                   | 0.5                       |
| <i>UBE2L3</i> | CG5788                 | 48146                | 16723               | 0.97                           | 1.5                          | 1.0                         | 0.0                   | 1.5                       |
| <i>UBE2L3</i> | CG5788                 | 48145                | 16723               | 0.97                           | 1.0                          | 0.0                         | 0.0                   | 1.0                       |
| <i>UBE2L3</i> | CG12799                | 20260                | 7832                | 0.98                           | 0.0                          | -1.0                        | 0.0                   | 1.0                       |
| <i>UBE2L3</i> | CG5788                 | 27515                | 11768               | 0.98                           | 0.0                          | 1.0                         | 0.0                   | 1.0                       |
| <i>UBE2L3</i> | CG5788                 | 48145                | 16723               | 0.97                           | 0.5                          | 0.5                         | 0.0                   | 0.5                       |
| <i>UBE2L3</i> | CG12799                | 106363               | 110243              | 1.00                           | 0.0                          | 0.5                         | 0.0                   | 0.5                       |
| <i>UBE2L3</i> | CG5788                 | 27515                | 11768               | 0.98                           | 0.0                          | 0.0                         | 0.0                   | 0.0                       |
| <i>UBE2L3</i> | CG12799                | 20260                | 7832                | 0.98                           | 0.0                          | 0.0                         | 0.0                   | 0.0                       |
| <i>UBE2L3</i> | CG5788                 | 100570               | 108273              | 1.00                           | 0.0                          | 0.0                         | 0.0                   | 0.0                       |
| <i>UBE2L3</i> | CG7425                 | 26012                | 10600               | 1.00                           | -1.0                         | 1.0                         | 0.0                   | 1.0                       |
| <i>UBE2L3</i> | CG7425                 | 105731               | 107993              | 1.00                           | 0.0                          | 0.0                         | -1.0                  | 1.0                       |
| <i>UBE2L3</i> | CG17030                | 108804               | 107234              | 1.00                           | 0.0                          | 0.0                         | 1.0                   | 1.0                       |
| <i>UBE2L3</i> | CG2574                 | 40173                | 9792                | 1.00                           | 0.0                          | 1.0                         | 0.0                   | 1.0                       |
| <i>UBE2L3</i> | CG10862                | 31372                | 7110                | 1.00                           | 1.0                          | 1.0                         | 0.0                   | 1.0                       |
| <i>UBE2L3</i> | CG17030                | 32827                | 9266                | 1.00                           | 0.0                          | -0.5                        | 0.0                   | 0.5                       |
| <i>UBE2L3</i> | CG17030                | 108804               | 107234              | 1.00                           | 0.0                          | -0.5                        | 0.0                   | 0.5                       |
| <i>UBE2L3</i> | CG10862                | 101113               | 106941              | 1.00                           | 0.5                          | 0.0                         | 0.0                   | 0.5                       |
| <i>UBE2L3</i> | CG2574                 | 105725               | 107231              | 0.99                           | 0.0                          | 0.0                         | 0.0                   | 0.0                       |
| <i>UBE2L3</i> | CG2574                 | 105725               | 107231              | 0.99                           | 0.0                          | 0.0                         | 0.0                   | 0.0                       |
| <i>UBE2L3</i> | CG10862                | 101113               | 106941              | 1.00                           | 0.0                          | 0.0                         | 0.0                   | 0.0                       |
| <i>UBE2L3</i> | CG17030                | 32827                | 9266                | 1.00                           | 0.0                          | 0.0                         | 0.0                   | 0.0                       |
| <i>UBE2L3</i> | CG10862                | 31372                | 7110                | 1.00                           | 0.0                          | 0.0                         | 0.0                   | 0.0                       |
| <i>UBE2L3</i> | CG2574                 | 40173                | 9792                | 1.00                           | 0.0                          | 0.0                         | 0.0                   | 0.0                       |
| <i>UBXD1</i>  | CG5469                 | 105104               | 100852              | 1.00                           | 0.0                          | 0.0                         | 0.0                   | 0.0                       |
| <i>UBXD1</i>  | CG5469                 | 39000                | 11667               | 1.00                           | 0.0                          | 0.0                         | 0.0                   | 0.0                       |
| <i>UBXD1</i>  | CG5469                 | 38998                | 11667               | 1.00                           | 0.0                          | 0.0                         | 0.0                   | 0.0                       |
| <i>WDR61</i>  | CG3909                 | 12758                | 4738                | 0.99                           | -2.5                         | -1.0                        | -1.0                  | 2.5                       |
| <i>WDR61</i>  | CG3909                 | 104387               | 108130              | 1.00                           | 0.0                          | 0.0                         | 0.0                   | 0.0                       |
| <i>XRN1</i>   | CG3291                 | 21677                | 10926               | 1.00                           | -1.0                         | 0.0                         | 0.0                   | 1.0                       |
| <i>XRN1</i>   | CG3291                 | 105739               | 108511              | 1.00                           | 0.0                          | 0.0                         | 0.0                   | 0.0                       |

## Supplementary references

1. Nyholt,D.R. A simple correction for multiple testing for single-nucleotide polymorphisms in linkage disequilibrium with each other. *Am. J. Hum. Genet.* **74**, 765-769 (2004).
2. Chambers,J.C. *et al.* Genome-wide association study identifies variants in TMPRSS6 associated with hemoglobin levels. *Nat. Genet.* **41**, 1170-1172 (2009).
3. Ganesh,S.K. *et al.* Multiple loci influence erythrocyte phenotypes in the CHARGE Consortium. *Nat. Genet.* **41**, 1191-1198 (2009).
4. Soranzo,N. *et al.* A genome-wide meta-analysis identifies 22 loci associated with eight hematological parameters in the HaemGen consortium. *Nat. Genet.* **41**, 1182-1190 (2009).
5. Kamatani,Y. *et al.* Genome-wide association study of hematological and biochemical traits in a Japanese population. *Nat. Genet* **42**, 210-215 (2010).
6. Ding,K. *et al.* Genetic Loci implicated in erythroid differentiation and cell cycle regulation are associated with red blood cell traits. *Mayo Clin. Proc.* **87**, 461-474 (2012).
7. Olivieri,N.F. The beta-thalassemyias. *N. Engl. J Med.* **341**, 99-109 (1999).
8. Thein,S.L. Genetic modifiers of beta-thalassemia. *Haematologica* **90**, 649-660 (2005).
9. Galanello,R. *et al.* Amelioration of Sardinian beta0 thalassemia by genetic modifiers. *Blood* **114**, 3935-3937 (2009).
10. Macdonald-Wallis,C., Tilling,K., Fraser,A., Nelson,S.M., & Lawlor,D.A. Established preeclampsia risk factors are related to patterns of blood pressure change in normal term pregnancy: findings from the Avon Longitudinal Study of Parents and Children. *J Hypertens.* **29**, 1703-1711 (2011).
11. Pollin,T.I. *et al.* A genome-wide scan of serum lipid levels in the Old Order Amish. *Atherosclerosis* **173**, 89-96 (2004).
12. Mitchell,B.D. *et al.* The genetic response to short-term interventions affecting cardiovascular function: rationale and design of the Heredity and Phenotype Intervention (HAPI) Heart Study. *Am. Heart J.* **155**, 823-828 (2008).
13. Firmann,M. *et al.* The CoLaus study: a population-based study to investigate the epidemiology and genetic determinants of cardiovascular risk factors and metabolic syndrome. *BMC. Cardiovasc. Disord.* **8**, 6 (2008).
14. Vaxillaire,M. *et al.* Impact of common type 2 diabetes risk polymorphisms in the DESIR prospective study. *Diabetes* **57**, 244-254 (2008).
15. Nelis,M. *et al.* Genetic structure of Europeans: a view from the North-East. *PLoS. One.* **4**, e5472 (2009).
16. Day,N. *et al.* EPIC-Norfolk: study design and characteristics of the cohort. European Prospective Investigation of Cancer. *Br. J Cancer* **80 Suppl 1**, 95-103 (1999).
17. Bhattacharyya,T. *et al.* Relationship of paraoxonase 1 (PON1) gene polymorphisms and functional activity with systemic oxidative stress and cardiovascular risk. *JAMA* **299**, 1265-1276 (2008).
18. Nalls,M.A. *et al.* Multiple loci are associated with white blood cell phenotypes. *PLoS. Genet* **7**, e1002113 (2011).
19. Colonna,V. *et al.* Comparing population structure as inferred from genealogical versus genetic information. *Eur. J Hum Genet* **17**, 1635-1641 (2009).
20. Valent,F., Schiava,F., Gnesutta,D., Brianti,G., & Barbone,F. [Evaluation of the effectiveness of influenza vaccination among the elderly in Friuli-Venezia Giulia (Italy)]. *Epidemiol. Prev.* **29**, 195-203 (2005).
21. Traglia,M. *et al.* Heritability and demographic analyses in the large isolated population of Val Borbera suggest advantages in mapping complex traits genes. *PLoS. One.* **4**, e7554 (2009).
22. Holz,T. *et al.* Markers of inflammation and weight change in middle-aged adults: results from the prospective MONICA/KORA S3/F3 study. *Obesity. (Silver. Spring)* **18**, 2347-2353 (2010).



23. Stockl,D. *et al.* Age at menarche and its association with the metabolic syndrome and its components: results from the KORA F4 study. *PLoS. One.* **6**, e26076 (2011).
24. Starr,J.M. & Deary,I.J. Sex differences in blood cell counts in the Lothian Birth Cohort 1921 between 79 and 87 years. *Maturitas* **69**, 373-376 (2011).
25. Deary,I.J., Whiteman,M.C., Starr,J.M., Whalley,L.J., & Fox,H.C. The impact of childhood intelligence on later life: following up the Scottish mental surveys of 1932 and 1947. *J Pers. Soc. Psychol.* **86**, 130-147 (2004).
26. Deary,I.J. *et al.* The Lothian Birth Cohort 1936: a study to examine influences on cognitive ageing from age 11 to age 70 and beyond. *BMC. Geriatr.* **7**, 28 (2007).
27. McIlhagger,R. *et al.* Differences in the haematological profile of healthy 70 year old men and women: normal ranges with confirmatory factor analysis. *BMC. Blood Disord.* **10**, 4 (2010).
28. Stolk,R.P. *et al.* Universal risk factors for multifactorial diseases: LifeLines: a three-generation population-based study. *Eur. J Epidemiol.* **23**, 67-74 (2008).
29. Chambers,J.C. *et al.* Genome-wide association study identifies loci influencing concentrations of liver enzymes in plasma. *Nat. Genet* **43**, 1131-1138 (2011).
30. Berglund,G., Elmstahl,S., Janzon,L., & Larsson,S.A. The Malmo Diet and Cancer Study. Design and feasibility. *J Intern. Med.* **233**, 45-51 (1993).
31. Padmanabhan,S. *et al.* Genome-wide association study of blood pressure extremes identifies variant near UMOD associated with hypertension. *PLoS. Genet.* **6**, e1001177 (2010).
32. Pattaro,C. *et al.* The genetic study of three population microisolates in South Tyrol (MICROS): study design and epidemiological perspectives. *BMC. Med. Genet* **8**, 29 (2007).
33. Penninx,B.W. *et al.* The Netherlands Study of Depression and Anxiety (NESDA): rationale, objectives and methods. *Int. J Methods Psychiatr. Res* **17**, 121-140 (2008).
34. Rantakallio,P. The longitudinal study of the northern Finland birth cohort of 1966. *Paediatr. Perinat. Epidemiol.* **2**, 59-88 (1988).
35. Willemsen,G. *et al.* The Netherlands Twin Register biobank: a resource for genetic epidemiological studies. *Twin Res Hum Genet* **13**, 231-245 (2010).
36. Diercks,G.F. *et al.* Rationale, design, and baseline characteristics of a trial of prevention of cardiovascular and renal disease with fasinopril and pravastatin in nonhypertensive, nonhypercholesterolemic subjects with microalbuminuria (the Prevention of RENal and Vascular ENdstage Disease Intervention Trial [PREVEND IT]). *Am. J Cardiol.* **86**, 635-638 (2000).
37. Evans,D.M., Frazer,I.H., & Martin,N.G. Genetic and environmental causes of variation in basal levels of blood cells. *Twin. Res.* **2**, 250-257 (1999).
38. Pilia,G. *et al.* Heritability of cardiovascular and personality traits in 6,148 Sardinians. *PLoS. Genet* **2**, e132 (2006).
39. Cao,A. *et al.* Thalassaemia and glucose-6-phosphate dehydrogenase screening in 13- to 14-year-old students of the Sardinian population: preliminary findings. *Community Genet* **11**, 121-128 (2008).
40. Volzke,H. *et al.* Cohort profile: the study of health in Pomerania. *Int. J Epidemiol.* **40**, 294-307 (2011).
41. Tonjes,A. *et al.* Genetic variation in GPR133 is associated with height: genome wide association study in the self-contained population of Sorbs. *Hum Mol. Genet* **18**, 4662-4668 (2009).
42. Spector,T.D. & MacGregor,A.J. The St. Thomas' UK Adult Twin Registry. *Twin Res* **5**, 440-443 (2002).
43. Dendrou,C.A. *et al.* Cell-specific protein phenotypes for the autoimmune locus IL2RA using a genotype-selectable human bioresource. *Nat. Genet* **41**, 1011-1015 (2009).
44. Winkelmann,B.R. *et al.* Rationale and design of the LURIC study--a resource for functional genomics, pharmacogenomics and long-term prognosis of cardiovascular disease. *Pharmacogenomics.* **2**, S1-73 (2001).
45. Fraumene,C. *et al.* High resolution analysis and phylogenetic network construction using complete mtDNA sequences in sardinian genetic isolates. *Mol. Biol Evol.* **23**, 2101-2111 (2006).

46. Achterberg,S. *et al.* Patients with coronary, cerebrovascular or peripheral arterial obstructive disease differ in risk for new vascular events and mortality: the SMART study. *Eur. J. Cardiovasc. Prev. Rehabil.* **17**, 424-430 (2010).
47. Simons,P.C., Algra,A., van de Laak,M.F., Grobbee,D.E., & van der Graaf,Y. Second manifestations of ARTerial disease (SMART) study: rationale and design. *Eur. J. Epidemiol.* **15**, 773-781 (1999).
48. Oikonen,M. *et al.* Genetic variants and blood pressure in a population-based cohort: the cardiovascular risk in young Finns study. *Hypertension* **58**, 1079-1085 (2011).
49. Kullo,I.J., Ding,K., Jouni,H., Smith,C.Y., & Chute,C.G. A genome-wide association study of red blood cell traits using the electronic medical record. *PLoS. One.* **5**, (2010).
50. Dixon,A.L. *et al.* A genome-wide association study of global gene expression. *Nat. Genet.* **39**, 1202-1207 (2007).
51. Dubois,P.C. *et al.* Multiple common variants for celiac disease influencing immune gene expression. *Nat. Genet* **42**, 295-302 (2010).
52. Leimeister,C., Schumacher,N., Steidl,C., & Gessler,M. Analysis of HeyL expression in wild-type and Notch pathway mutant mouse embryos. *Mech. Dev.* **98**, 175-178 (2000).
53. Lavery,D.N. *et al.* Repression of androgen receptor activity by HEYL, a third member of the Hairy/Enhancer-of-split-related family of Notch effectors. *J Biol Chem.* **286**, 17796-17808 (2011).
54. Kassouf,M.T. *et al.* Genome-wide identification of TAL1's functional targets: insights into its mechanisms of action in primary erythroid cells. *Genome Res* **20**, 1064-1083 (2010).
55. Pali,C.G. *et al.* Differential genomic targeting of the transcription factor TAL1 in alternate haematopoietic lineages. *EMBO J* **30**, 494-509 (2011).
56. Delaunay,J. The molecular basis of hereditary red cell membrane disorders. *Blood Rev.* **21**, 1-20 (2007).
57. Cuesta,R., Martinez-Sanchez,A., & Gebauer,F. miR-181a regulates cap-dependent translation of p27(kip1) mRNA in myeloid cells. *Mol. Cell Biol* **29**, 2841-2851 (2009).
58. Jazdzewski,K. *et al.* Thyroid hormone receptor beta (THRB) is a major target gene for microRNAs deregulated in papillary thyroid carcinoma (PTC). *J Clin. Endocrinol. Metab* **96**, E546-E553 (2011).
59. Shin,K.H. *et al.* miR-181a shows tumor suppressive effect against oral squamous cell carcinoma cells by downregulating K-ras. *Biochem. Biophys. Res Commun.* **404**, 896-902 (2011).
60. Chen,G. *et al.* MicroRNA-181a sensitizes human malignant glioma U87MG cells to radiation by targeting Bcl-2. *Oncol. Rep.* **23**, 997-1003 (2010).
61. Gao,W. *et al.* Deregulated expression of miR-21, miR-143 and miR-181a in non small cell lung cancer is related to clinicopathologic characteristics or patient prognosis. *Biomed. Pharmacother.* **64**, 399-408 (2010).
62. Tempel,B.L. & Shilling,D.J. The plasma membrane calcium ATPase and disease. *Subcell. Biochem.* **45**, 365-383 (2007).
63. Hopkins,P.C., Sainz-Fuertes,R., & Lovestone,S. The impact of a novel apolipoprotein E and amyloid-beta protein precursor-interacting protein on the production of amyloid-beta. *J Alzheimers. Dis.* **26**, 239-253 (2011).
64. Rozengurt,E., Rey,O., & Waldron,R.T. Protein kinase D signaling. *J Biol Chem.* **280**, 13205-13208 (2005).
65. Nuinon,M. *et al.* A genome-wide association identified the common genetic variants influence disease severity in beta0-thalassemia/hemoglobin E. *Hum Genet* **127**, 303-314 (2010).
66. Voight,B.F. *et al.* Twelve type 2 diabetes susceptibility loci identified through large-scale association analysis. *Nat. Genet* **42**, 579-589 (2010).
67. Jameson,J.L. Mechanisms by which thyroid hormone receptor mutations cause clinical syndromes of resistance to thyroid hormone. *Thyroid* **4**, 485-492 (1994).

68. Jiang,Y. *et al.* The G protein G alpha12 stimulates Bruton's tyrosine kinase and a rasGAP through a conserved PH/BM domain. *Nature* **395**, 808-813 (1998).
69. Liu,Z. & Gilbert,W. The yeast KEM1 gene encodes a nuclease specific for G4 tetraplex DNA: implication of in vivo functions for this novel DNA structure. *Cell* **77**, 1083-1092 (1994).
70. Aisen,P. Transferrin receptor 1. *Int. J Biochem. Cell Biol* **36**, 2137-2143 (2004).
71. Kimura,Y. *et al.* c-Kit-mediated functional positioning of stem cells to their niches is essential for maintenance and regeneration of adult hematopoiesis. *PLoS. One.* **6**, e26918 (2011).
72. Blacque,O.E. *et al.* Loss of *C. elegans* BBS-7 and BBS-8 protein function results in cilia defects and compromised intraflagellar transport. *Genes Dev.* **18**, 1630-1642 (2004).
73. Pan,J. *et al.* Suppression of cell-cycle progression by Jun dimerization protein-2 (JDP2) involves downregulation of cyclin-A2. *Oncogene* **29**, 6245-6256 (2010).
74. Li,J. *et al.* Crystal structure of human guanosine monophosphate reductase 2 (GMPR2) in complex with GMP. *J Mol. Biol* **355**, 980-988 (2006).
75. Hanson,E.H., Imperatore,G., & Burke,W. HFE gene and hereditary hemochromatosis: a HuGE review. *Human Genome Epidemiology. Am. J Epidemiol.* **154**, 193-206 (2001).
76. Jutabha,P. *et al.* Human sodium phosphate transporter 4 (hNPT4/SLC17A3) as a common renal secretory pathway for drugs and urate. *J Biol Chem.* **285**, 35123-35132 (2010).
77. Roberts,J.D., Jr., Chiche,J.D., Kolpa,E.M., Bloch,D.B., & Bloch,K.D. cGMP-dependent protein kinase I interacts with TRIM39R, a novel Rpp21 domain-containing TRIM protein. *Am. J Physiol Lung Cell Mol. Physiol* **293**, L903-L912 (2007).
78. Reinshagen,M. *et al.* HLA class II gene frequencies in Crohn's disease: a population based analysis in Germany. *Gut* **38**, 538-542 (1996).
79. Cowland,J.B., Andersen,V., Halberg,P., & Morling,N. DNA polymorphism of HLA class II genes in systemic lupus erythematosus. *Tissue Antigens* **43**, 34-37 (1994).
80. Erlich,H. *et al.* HLA DR-DQ haplotypes and genotypes and type 1 diabetes risk: analysis of the type 1 diabetes genetics consortium families. *Diabetes* **57**, 1084-1092 (2008).
81. Hor,H. *et al.* Genome-wide association study identifies new HLA class II haplotypes strongly protective against narcolepsy. *Nat. Genet* **42**, 786-789 (2010).
82. Barcellos,L.F. *et al.* High-density SNP screening of the major histocompatibility complex in systemic lupus erythematosus demonstrates strong evidence for independent susceptibility regions. *PLoS. Genet* **5**, e1000696 (2009).
83. Galligan,C.L., Baig,E., Bykerk,V., Keystone,E.C., & Fish,E.N. Distinctive gene expression signatures in rheumatoid arthritis synovial tissue fibroblast cells: correlates with disease activity. *Genes Immun.* **8**, 480-491 (2007).
84. Kozar,K. *et al.* Mouse development and cell proliferation in the absence of D-cyclins. *Cell* **118**, 477-491 (2004).
85. Ferrara,N. & Gerber,H.P. The role of vascular endothelial growth factor in angiogenesis. *Acta Haematol.* **106**, 148-156 (2001).
86. Watanabe,O. *et al.* Overproduction of vascular endothelial growth factor/vascular permeability factor is causative in Crow-Fukase (POEMS) syndrome. *Muscle Nerve* **21**, 1390-1397 (1998).
87. Caldwell,R.B. *et al.* Vascular endothelial growth factor and diabetic retinopathy: pathophysiological mechanisms and treatment perspectives. *Diabetes Metab Res Rev.* **19**, 442-455 (2003).
88. Menzel,S. *et al.* The HBS1L-MYB intergenic region on chromosome 6q23.3 influences erythrocyte, platelet, and monocyte counts in humans. *Blood* **110**, 3624-3626 (2007).
89. Thein,S.L. *et al.* Intergenic variants of HBS1L-MYB are responsible for a major quantitative trait locus on chromosome 6q23 influencing fetal hemoglobin levels in adults. *Proc. Natl. Acad. Sci. U. S. A* **104**, 11346-11351 (2007).

90. Lettre,G. *et al.* DNA polymorphisms at the BCL11A, HBS1L-MYB, and beta-globin loci associate with fetal hemoglobin levels and pain crises in sickle cell disease. *Proc. Natl. Acad. Sci. U. S. A* **105**, 11869-11874 (2008).
91. Kranc,K.R. *et al.* Cited2 is an essential regulator of adult hematopoietic stem cells. *Cell Stem Cell* **5**, 659-665 (2009).
92. Bamforth,S.D. *et al.* Cardiac malformations, adrenal agenesis, neural crest defects and exencephaly in mice lacking Cited2, a new Tfp2 co-activator. *Nat. Genet* **29**, 469-474 (2001).
93. Feng,Y. & Bankston,A. The star family member QKI and cell signaling. *Adv. Exp. Med. Biol* **693**, 25-36 (2010).
94. Georgopoulos,K., Winandy,S., & Avitahl,N. The role of the Ikaros gene in lymphocyte development and homeostasis. *Annu. Rev. Immunol.* **15**, 155-176 (1997).
95. Jager,R. *et al.* Deletions of the transcription factor Ikaros in myeloproliferative neoplasms. *Leukemia* **24**, 1290-1298 (2010).
96. Kuroda,Y., Oma,Y., Nishimori,K., Ohta,T., & Harata,M. Brain-specific expression of the nuclear actin-related protein ArpNalpha and its involvement in mammalian SWI/SNF chromatin remodeling complex. *Biochem. Biophys. Res Commun.* **299**, 328-334 (2002).
97. Forejtnikova,H. *et al.* Transferrin receptor 2 is a component of the erythropoietin receptor complex and is required for efficient erythropoiesis. *Blood* **116**, 5357-5367 (2010).
98. Folmes,K.D. *et al.* Distinct early signaling events resulting from the expression of the PRKAG2 R302Q mutant of AMPK contribute to increased myocardial glycogen. *Circ. Cardiovasc. Genet* **2**, 457-466 (2009).
99. Bennett,V. Immunoreactive forms of human erythrocyte ankyrin are present in diverse cells and tissues. *Nature* **281**, 597-599 (1979).
100. Gallagher,P.G. *et al.* Mutation of a barrier insulator in the human ankyrin-1 gene is associated with hereditary spherocytosis. *J Clin. Invest* **120**, 4453-4465 (2010).
101. Horn,D.M., Mason,S.L., & Karbstein,K. Rcl1 protein, a novel nuclease for 18 S ribosomal RNA production. *J Biol Chem.* **286**, 34082-34087 (2011).
102. Nakao,M. *et al.* ABO blood group alleles and the risk of pancreatic cancer in a Japanese population. *Cancer Sci.* **102**, 1076-1080 (2011).
103. Nakao,M. *et al.* ABO genotype and the risk of gastric cancer, atrophic gastritis, and Helicobacter pylori infection. *Cancer Epidemiol. Biomarkers Prev.* **20**, 1665-1672 (2011).
104. Plagnol,V. *et al.* Genome-wide association analysis of autoantibody positivity in type 1 diabetes cases. *PLoS. Genet* **7**, e1002216 (2011).
105. Goto,E. *et al.* c-MIR, a human E3 ubiquitin ligase, is a functional homolog of herpesvirus proteins MIR1 and MIR2 and has similar activity. *J Biol Chem.* **278**, 14657-14668 (2003).
106. Barteel,E., Mansouri,M., Hovey Nerenberg,B.T., Gouveia,K., & Fruh,K. Downregulation of major histocompatibility complex class I by human ubiquitin ligases related to viral immune evasion proteins. *J Virol.* **78**, 1109-1120 (2004).
107. Murakami,K., Kanno,H., Tancabelic,J., & Fujii,H. Gene expression and biological significance of hexokinase in erythroid cells. *Acta Haematol.* **108**, 204-209 (2002).
108. van,W.R., Rijksen,G., Huizinga,E.G., Nieuwenhuis,H.K., & van Solinge,W.W. HK Utrecht: missense mutation in the active site of human hexokinase associated with hexokinase deficiency and severe nonspherocytic hemolytic anemia. *Blood* **101**, 345-347 (2003).
109. Tarlinton,D., Light,A., Metcalf,D., Harvey,R.P., & Robb,L. Architectural defects in the spleens of Nkx2-3-deficient mice are intrinsic and associated with defects in both B cell maturation and T cell-dependent immune responses. *J Immunol.* **170**, 4002-4010 (2003).
110. Fisher,S.A. *et al.* Genetic determinants of ulcerative colitis include the ECM1 locus and five loci implicated in Crohn's disease. *Nat. Genet* **40**, 710-712 (2008).
111. Gao,N., Hibi,Y., Cueno,M., Asamitsu,K., & Okamoto,T. A-kinase-interacting protein 1 (AKIP1) acts as a molecular determinant of PKA in NF-kappaB signaling. *J Biol Chem.* **285**, 28097-28104 (2010).

112. Majidi,M., Hubbs,A.E., & Lichy,J.H. Activation of extracellular signal-regulated kinase 2 by a novel Abl-binding protein, ST5. *J Biol Chem.* **273**, 16608-16614 (1998).
113. Gohring,I. *et al.* Disruption of ST5 is associated with mental retardation and multiple congenital anomalies. *J Med. Genet* **47**, 91-98 (2010).
114. Robinson,F.L., Niesman,I.R., Beiswenger,K.K., & Dixon,J.E. Loss of the inactive myotubularin-related phosphatase Mtmr13 leads to a Charcot-Marie-Tooth 4B2-like peripheral neuropathy in mice. *Proc. Natl. Acad. Sci. U. S. A* **105**, 4916-4921 (2008).
115. Cai,L., Holoweckyj,N., Schaller,M.D., & Bear,J.E. Phosphorylation of coronin 1B by protein kinase C regulates interaction with Arp2/3 and cell motility. *J Biol Chem.* **280**, 31913-31923 (2005).
116. Fortin,M. *et al.* Apoptosis mediated through CD45 is independent of its phosphatase activity and association with leukocyte phosphatase-associated phosphoprotein. *J Immunol.* **168**, 6084-6089 (2002).
117. Slattery,M.L., Lundgreen,A., Herrick,J.S., & Wolff,R.K. Genetic variation in RPS6KA1, RPS6KA2, RPS6KB1, RPS6KB2, and PDK1 and risk of colon or rectal cancer. *Mutat. Res* **706**, 13-20 (2011).
118. Rumenapp,U., Freichel-Blomquist,A., Wittinghofer,B., Jakobs,K.H., & Wieland,T. A mammalian Rho-specific guanine-nucleotide exchange factor (p164-RhoGEF) without a pleckstrin homology domain. *Biochem. J* **366**, 721-728 (2002).
119. Bar,I. *et al.* Knockout mice reveal a role for P2Y6 receptor in macrophages, endothelial cells, and vascular smooth muscle cells. *Mol. Pharmacol.* **74**, 777-784 (2008).
120. Riegel,A.K. *et al.* Selective induction of endothelial P2Y6 nucleotide receptor promotes vascular inflammation. *Blood* **117**, 2548-2555 (2011).
121. Perets,T., Blumenstein,Y., Shistik,E., Lotan,I., & Dascal,N. A potential site of functional modulation by protein kinase A in the cardiac Ca<sup>2+</sup> channel alpha 1C subunit. *FEBS Lett.* **384**, 189-192 (1996).
122. Decker,T. *et al.* Cell cycle progression of chronic lymphocytic leukemia cells is controlled by cyclin D2, cyclin D3, cyclin-dependent kinase (cdk) 4 and the cdk inhibitor p27. *Leukemia* **16**, 327-334 (2002).
123. Geissler,E.N. *et al.* Stem cell factor (SCF), a novel hematopoietic growth factor and ligand for c-kit tyrosine kinase receptor, maps on human chromosome 12 between 12q14.3 and 12qter. *Somat. Cell Mol. Genet* **17**, 207-214 (1991).
124. Figueroa,K.P. *et al.* Genetic variance in the spinocerebellar ataxia type 2 (ATXN2) gene in children with severe early onset obesity. *PLoS. One.* **4**, e8280 (2009).
125. Daoud,H. *et al.* Association of long ATXN2 CAG repeat sizes with increased risk of amyotrophic lateral sclerosis. *Arch. Neurol.* **68**, 739-742 (2011).
126. Devalliere,J. & Charreau,B. The adaptor Lnk (SH2B3): an emerging regulator in vascular cells and a link between immune and inflammatory signaling. *Biochem. Pharmacol.* **82**, 1391-1402 (2011).
127. Schallus,T. *et al.* Malectin: a novel carbohydrate-binding protein of the endoplasmic reticulum and a candidate player in the early steps of protein N-glycosylation. *Mol. Biol Cell* **19**, 3404-3414 (2008).
128. Manne,V. *et al.* Identification and preliminary characterization of protein-cysteine farnesyltransferase. *Proc. Natl. Acad. Sci. U. S. A* **87**, 7541-7545 (1990).
129. Luscher,B. Function and regulation of the transcription factors of the Myc/Max/Mad network. *Gene* **277**, 1-14 (2001).
130. Vannahme,C. *et al.* Characterization of SMOC-1, a novel modular calcium-binding protein in basement membranes. *J Biol Chem.* **277**, 37977-37986 (2002).
131. Okada,I. *et al.* SMOC1 is essential for ocular and limb development in humans and mice. *Am. J Hum Genet* **88**, 30-41 (2011).
132. Asano,K. *et al.* Multiple roles for the C-terminal domain of eIF5 in translation initiation complex assembly and GTPase activation. *EMBO J* **20**, 2326-2337 (2001).

133. Jansen,H., Verhoeven,A.J., & Sijbrands,E.J. Hepatic lipase: a pro- or anti-atherogenic protein? *J Lipid Res* **43**, 1352-1362 (2002).
134. Yu,Y. *et al.* Association of variants in the LIPC and ABCA1 genes with intermediate and large drusen and advanced age-related macular degeneration. *Invest Ophthalmol. Vis. Sci.* **52**, 4663-4670 (2011).
135. Semova,N. *et al.* Molecular cloning, structural analysis, and expression of a human IRLB, MYC promoter-binding protein: new DENN domain-containing protein family emerges small star, filled. *Genomics* **82**, 343-354 (2003).
136. Courilleau,D. *et al.* B-ind1, a novel mediator of Rac1 signaling cloned from sodium butyrate-treated fibroblasts. *J Biol Chem.* **275**, 17344-17348 (2000).
137. Daugherty,M. *et al.* Complete reconstitution of the human coenzyme A biosynthetic pathway via comparative genomics. *J Biol Chem.* **277**, 21431-21439 (2002).
138. Han,C. *et al.* Human SCAMP5, a novel secretory carrier membrane protein, facilitates calcium-triggered cytokine secretion by interaction with SNARE machinery. *J Immunol.* **182**, 2986-2996 (2009).
139. Noh,J.Y. *et al.* SCAMP5 links endoplasmic reticulum stress to the accumulation of expanded polyglutamine protein aggregates via endocytosis inhibition. *J Biol Chem.* **284**, 11318-11325 (2009).
140. Harari,D. *et al.* Neuregulin-4: a novel growth factor that acts through the ErbB-4 receptor tyrosine kinase. *Oncogene* **18**, 2681-2689 (1999).
141. Robichon,C. *et al.* DnaJA4 is a SREBP-regulated chaperone involved in the cholesterol biosynthesis pathway. *Biochim. Biophys. Acta* **1761**, 1107-1113 (2006).
142. Zhu,B. *et al.* The human PAF complex coordinates transcription with events downstream of RNA synthesis. *Genes Dev.* **19**, 1668-1673 (2005).
143. Neklesa,T.K. & Davis,R.W. A genome-wide screen for regulators of TORC1 in response to amino acid starvation reveals a conserved Npr2/3 complex. *PLoS. Genet* **5**, e1000515 (2009).
144. Reseland,J.E. *et al.* A novel human chymotrypsin-like digestive enzyme. *J Biol Chem.* **272**, 8099-8104 (1997).
145. Simon,E., Camier,S., & Seraphin,B. New insights into the control of mRNA decapping. *Trends Biochem. Sci.* **31**, 241-243 (2006).
146. Paschal,B.M. & Gerace,L. Identification of NTF2, a cytosolic factor for nuclear import that interacts with nuclear pore complex protein p62. *J Cell Biol* **129**, 925-937 (1995).
147. McHugh,B.J. *et al.* Integrin activation by Fam38A uses a novel mechanism of R-Ras targeting to the endoplasmic reticulum. *J Cell Sci.* **123**, 51-61 (2010).
148. D'Agostino,L. & Giordano,A. Possible functional role of NSPs in cancer. *Cell Cycle* **7**, 1810-1827 (2008).
149. Morerio,C. *et al.* HCMOGT-1 is a novel fusion partner to PDGFRB in juvenile myelomonocytic leukemia with t(5;17)(q33;p11.2). *Cancer Res* **64**, 2649-2651 (2004).
150. Dennerlein,S., Rozanska,A., Wydro,M., Chrzanowska-Lightowlers,Z.M., & Lightowlers,R.N. Human ERAL1 is a mitochondrial RNA chaperone involved in the assembly of the 28S small mitochondrial ribosomal subunit. *Biochem. J* **430**, 551-558 (2010).
151. Holland,P.M. *et al.* Purification, cloning, and characterization of Nek8, a novel NIMA-related kinase, and its candidate substrate Bicd2. *J Biol Chem.* **277**, 16229-16240 (2002).
152. Otto,E.A. *et al.* NEK8 mutations affect ciliary and centrosomal localization and may cause nephronophthisis. *J Am. Soc. Nephrol.* **19**, 587-592 (2008).
153. Forrest,A.R., Taylor,D., & Grimmond,S. Exploration of the cell-cycle genes found within the RIKEN FANTOM2 data set. *Genome Res* **13**, 1366-1375 (2003).
154. Zapata,J.M. *et al.* A diverse family of proteins containing tumor necrosis factor receptor-associated factor domains. *J Biol Chem.* **276**, 24242-24252 (2001).

155. Chen,H.H., Wang,Y.C., & Fann,M.J. Identification and characterization of the CDK12/cyclin L1 complex involved in alternative splicing regulation. *Mol. Cell Biol* **26**, 2736-2745 (2006).
156. Ko,T.K., Kelly,E., & Pines,J. CrkRS: a novel conserved Cdc2-related protein kinase that colocalises with SC35 speckles. *J Cell Sci.* **114**, 2591-2603 (2001).
157. Bartkowiak,B. *et al.* CDK12 is a transcription elongation-associated CTD kinase, the metazoan ortholog of yeast Ctk1. *Genes Dev.* **24**, 2303-2316 (2010).
158. McCormick,M.B. *et al.* NeuroD2 and neuroD3: distinct expression patterns and transcriptional activation potentials within the neuroD gene family. *Mol. Cell Biol* **16**, 5792-5800 (1996).
159. Messmer,K., Shen,W.B., Remington,M., & Fishman,P.S. Induction of neural differentiation by the transcription factor NeuroD2. *Int. J Dev. Neurosci.*(2011).
160. Shmukler,B.E., Wilhelm,S., & Alper,S.L. Short sequence repeat polymorphism in the mouse *slc4a1* gene encoding the AE1 Cl-/HCO<sub>3</sub>-exchanger. *DNA Seq.* **11**, 447-450 (2000).
161. Bruce,L.J. *et al.* Altered structure and anion transport properties of band 3 (AE1, SLC4A1) in human red cells lacking glycophorin A. *J Biol Chem.* **279**, 2414-2420 (2004).
162. Delaunay,J. Molecular basis of red cell membrane disorders. *Acta Haematol.* **108**, 210-218 (2002).
163. Voit,R., Kuhn,A., Sander,E.E., & Grummt,I. Activation of mammalian ribosomal gene transcription requires phosphorylation of the nucleolar transcription factor UBF. *Nucleic Acids Res* **23**, 2593-2599 (1995).
164. Sakakibara,T., Nemoto,Y., Nukiwa,T., & Takeshima,H. Identification and characterization of a novel Rho GTPase activating protein implicated in receptor-mediated endocytosis. *FEBS Lett.* **566**, 294-300 (2004).
165. Kahn,R.A., Kern,F.G., Clark,J., Gelmann,E.P., & Rulka,C. Human ADP-ribosylation factors. A functionally conserved family of GTP-binding proteins. *J Biol Chem.* **266**, 2606-2614 (1991).
166. Aguilera,G., Nikodemova,M., Wynn,P.C., & Catt,K.J. Corticotropin releasing hormone receptors: two decades later. *Peptides* **25**, 319-329 (2004).
167. Grigorenko,A.P., Moliaka,Y.K., Korovaitseva,G.I., & Rogaev,E.I. Novel class of polytopic proteins with domains associated with putative protease activity. *Biochemistry (Mosc.)* **67**, 826-835 (2002).
168. Cai,Y. *et al.* Subunit composition and substrate specificity of a MOF-containing histone acetyltransferase distinct from the male-specific lethal (MSL) complex. *J Biol Chem.* **285**, 4268-4272 (2010).
169. Southall,S.M., Wong,P.S., Odho,Z., Roe,S.M., & Wilson,J.R. Structural basis for the requirement of additional factors for MLL1 SET domain activity and recognition of epigenetic marks. *Mol. Cell* **33**, 181-191 (2009).
170. Seeger,M.A. & Rice,S.E. Microtubule-associated protein-like binding of the kinesin-1 tail to microtubules. *J Biol Chem.* **285**, 8155-8162 (2010).
171. Aranda-Abreu,G.E., Hernandez,M.E., Soto,A., & Manzo,J. Possible Cis-acting signal that could be involved in the localization of different mRNAs in neuronal axons. *Theor. Biol Med. Model.* **2**, 33 (2005).
172. Iqbal,K., Liu,F., Gong,C.X., & Grundke-Iqbal,I. Tau in Alzheimer disease and related tauopathies. *Curr. Alzheimer Res* **7**, 656-664 (2010).
173. Hoglinger,G.U. *et al.* Identification of common variants influencing risk of the tauopathy progressive supranuclear palsy. *Nat. Genet* **43**, 699-705 (2011).
174. Gao,L., Tse,S.W., Conrad,C., & Andreadis,A. Saitohin, which is nested in the tau locus and confers allele-specific susceptibility to several neurodegenerative diseases, interacts with peroxiredoxin 6. *J Biol Chem.* **280**, 39268-39272 (2005).

175. Chang,S.C., Heacock,P.N., Clancey,C.J., & Dowhan,W. The PEL1 gene (renamed PGS1) encodes the phosphatidylglycero-phosphate synthase of *Saccharomyces cerevisiae*. *J Biol Chem.* **273**, 9829-9836 (1998).
176. Le,B.R., Alconada,A., Bauer,U., & Hoflack,B. The mammalian AP-3 adaptor-like complex mediates the intracellular transport of lysosomal membrane glycoproteins. *J Biol Chem.* **273**, 29451-29461 (1998).
177. Lua,B.L. & Low,B.C. Activation of EGF receptor endocytosis and ERK1/2 signaling by BPGAP1 requires direct interaction with EEN/endophilin II and a functional RhoGAP domain. *J Cell Sci.* **118**, 2707-2721 (2005).
178. So,C.W. *et al.* EEN encodes for a member of a new family of proteins containing an Src homology 3 domain and is the third gene located on chromosome 19p13 that fuses to MLL in human leukemia. *Proc. Natl. Acad. Sci. U. S. A* **94**, 2563-2568 (1997).
179. Nagahama,M. *et al.* UBXD1 is a VCP-interacting protein that is involved in ER-associated degradation. *Biochem. Biophys. Res Commun.* **382**, 303-308 (2009).
180. Qiu,Y. & Michalak,M. Transcriptional control of the calreticulin gene in health and disease. *Int. J Biochem. Cell Biol* **41**, 531-538 (2009).
181. Yang,D.C. Mammalian aminoacyl-tRNA synthetases. *Curr. Top. Cell Regul.* **34**, 101-136 (1996).
182. Sen,S. *et al.* Expression of a gene encoding a tRNA synthetase-like protein is enhanced in tumorigenic human myeloid leukemia cells and is cell cycle stage- and differentiation-dependent. *Proc. Natl. Acad. Sci. U. S. A* **94**, 6164-6169 (1997).
183. Costa,Y. *et al.* Two novel proteins recruited by synaptonemal complex protein 1 (SYCP1) are at the centre of meiosis. *J Cell Sci.* **118**, 2755-2762 (2005).
184. Bolcun-Filas,E. *et al.* SYCE2 is required for synaptonemal complex assembly, double strand break repair, and homologous recombination. *J Cell Biol* **176**, 741-747 (2007).
185. Ofman,R., Speijer,D., Leen,R., & Wanders,R.J. Proteomic analysis of mouse kidney peroxisomes: identification of RP2p as a peroxisomal nudix hydrolase with acyl-CoA diphosphatase activity. *Biochem. J* **393**, 537-543 (2006).
186. Shu,L., Yan,W., & Chen,X. RNPC1, an RNA-binding protein and a target of the p53 family, is required for maintaining the stability of the basal and stress-induced p21 transcript. *Genes Dev.* **20**, 2961-2972 (2006).
187. Ronn,T. *et al.* Genetic variation in ATP5O is associated with skeletal muscle ATP5O mRNA expression and glucose uptake in young twins. *PLoS. One.* **4**, e4793 (2009).
188. Moynihan,T.P. *et al.* Characterization of a human ubiquitin-conjugating enzyme gene UBE2L3. *Mamm. Genome* **7**, 520-525 (1996).
189. Cenciarelli,C. *et al.* Identification of a family of human F-box proteins. *Curr. Biol* **9**, 1177-1179 (1999).
190. Lomonosov,M. *et al.* Expression of Fbxo7 in haematopoietic progenitor cells cooperates with p53 loss to promote lymphomagenesis. *PLoS. One.* **6**, e21165 (2011).
191. Du,X. *et al.* The serine protease TMPRSS6 is required to sense iron deficiency. *Science* **320**, 1088-1092 (2008).
192. Finberg,K.E. *et al.* Mutations in TMPRSS6 cause iron-refractory iron deficiency anemia (IRIDA). *Nat. Genet* **40**, 569-571 (2008).
193. Usuki,K. *et al.* Platelet-derived endothelial cell growth factor has thymidine phosphorylase activity. *Biochem. Biophys. Res Commun.* **184**, 1311-1316 (1992).
194. Ono,T. *et al.* Differential contributions of condensin I and condensin II to mitotic chromosome architecture in vertebrate cells. *Cell* **115**, 109-121 (2003).
195. Gosling,K.M. *et al.* A mutation in a chromosome condensin II subunit, kleisin beta, specifically disrupts T cell development. *Proc. Natl. Acad. Sci. U. S. A* **104**, 12445-12450 (2007).



196. Glerum,D.M., Shtanko,A., & Tzagoloff,A. SCO1 and SCO2 act as high copy suppressors of a mitochondrial copper recruitment defect in *Saccharomyces cerevisiae*. *J Biol Chem.* **271**, 20531-20535 (1996).
197. Verdijk,R.M. *et al.* Phenotypic consequences of a novel SCO2 gene mutation. *Am. J Med. Genet A* **146A**, 2822-2827 (2008).

**Supplementary Figure 1. Study design.**

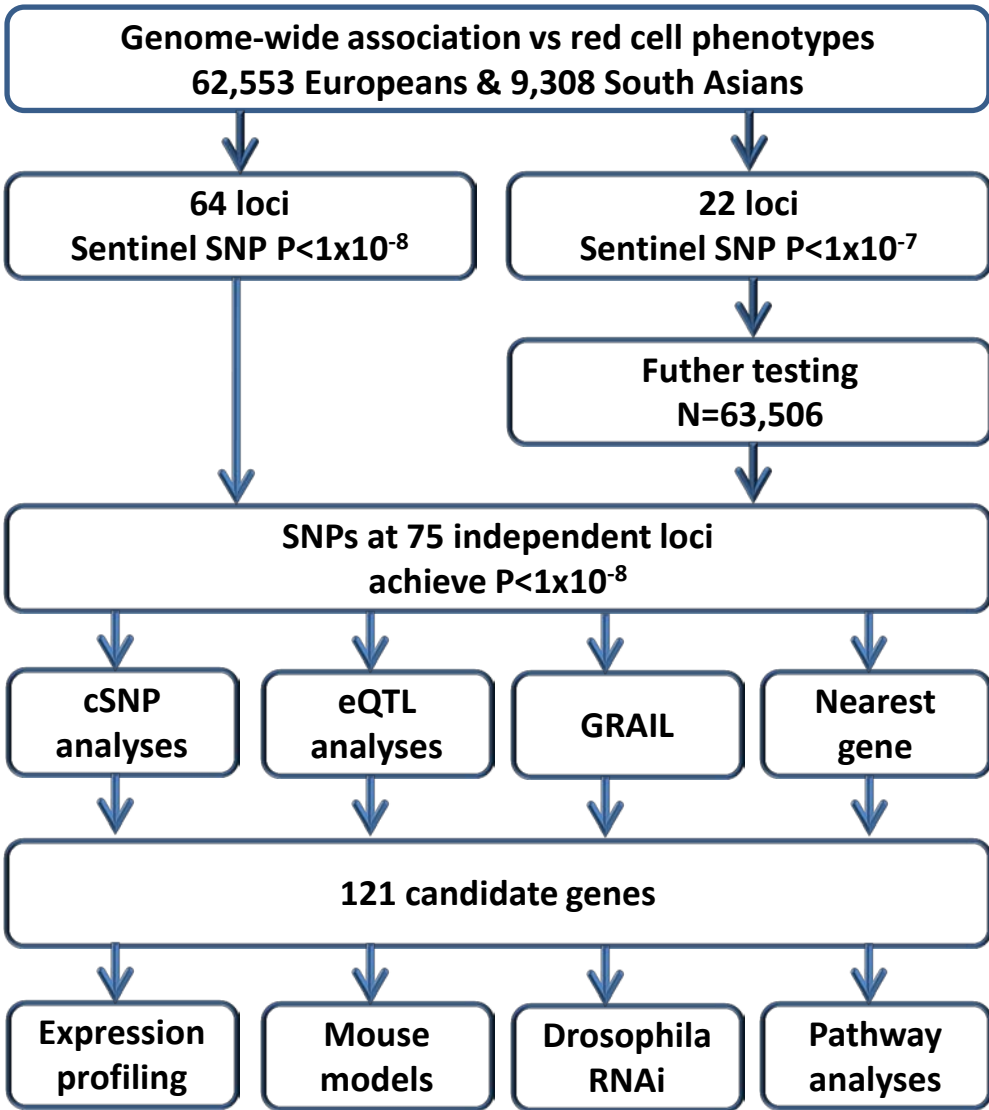

**Supplementary Figure 2.** SF2.1 to SF2.6: Manhattan plots showing results for genome-wide association with red blood cell traits amongst Europeans. SNPs reaching genome-wide significance ( $P < 1 \times 10^{-8}$ ) are coloured red (novel loci) or blue (previously reported loci). SNPs coloured green are at loci which reached  $P > 1 \times 10^{-8}$  but  $P < 1 \times 10^{-7}$ , and that were carried forward for further testing.

**SF2.1: Haemoglobin**

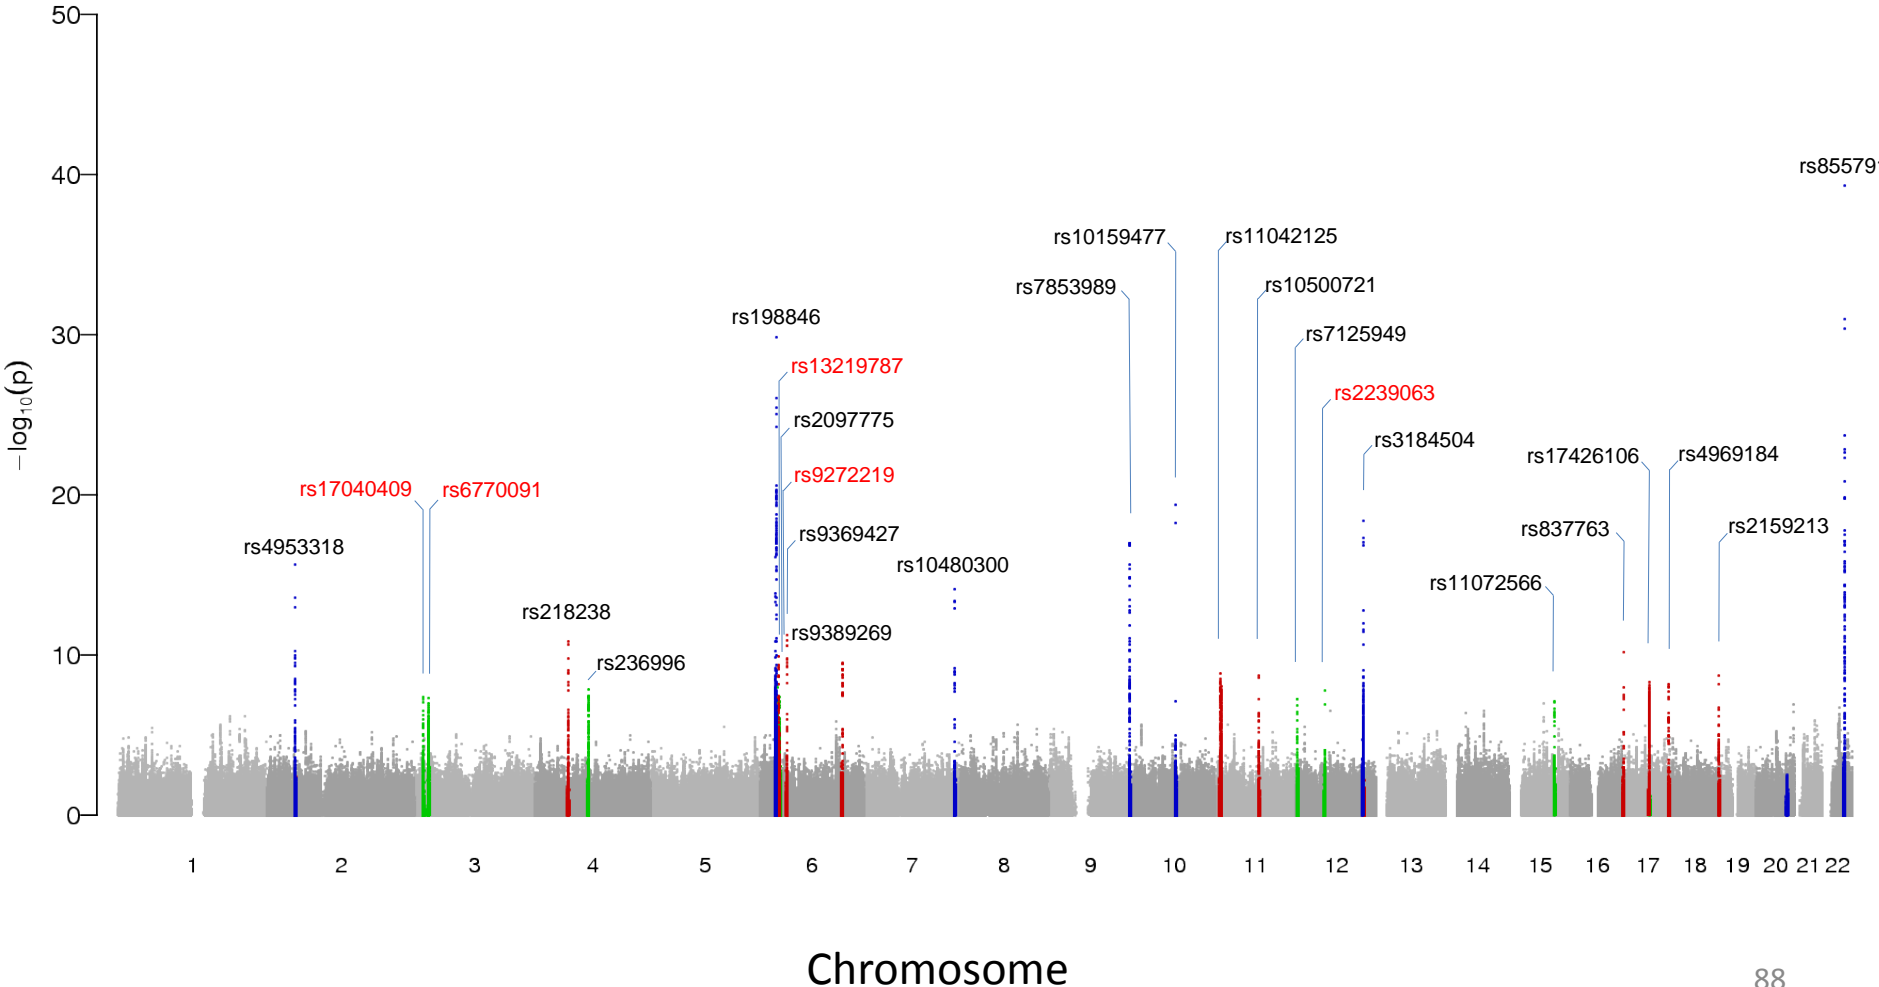

# SF2.2: MCH

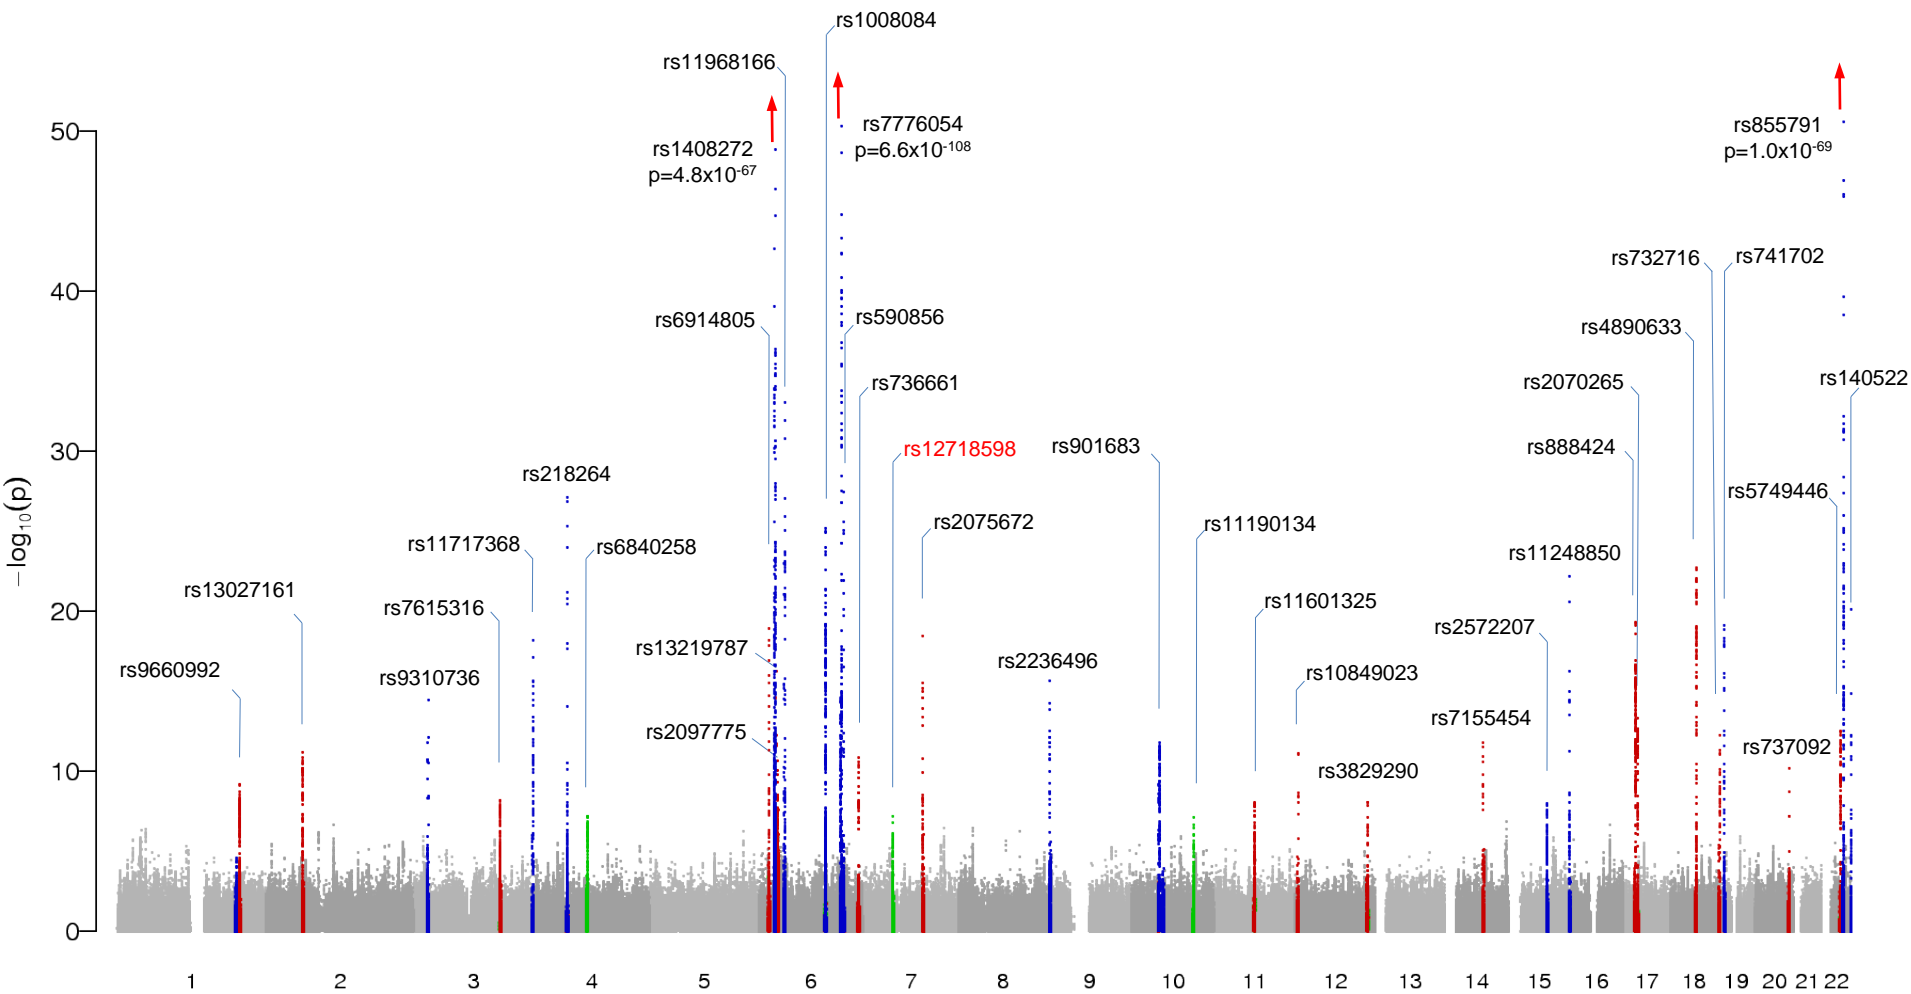

Chromosome

# SF2.3: MCHC

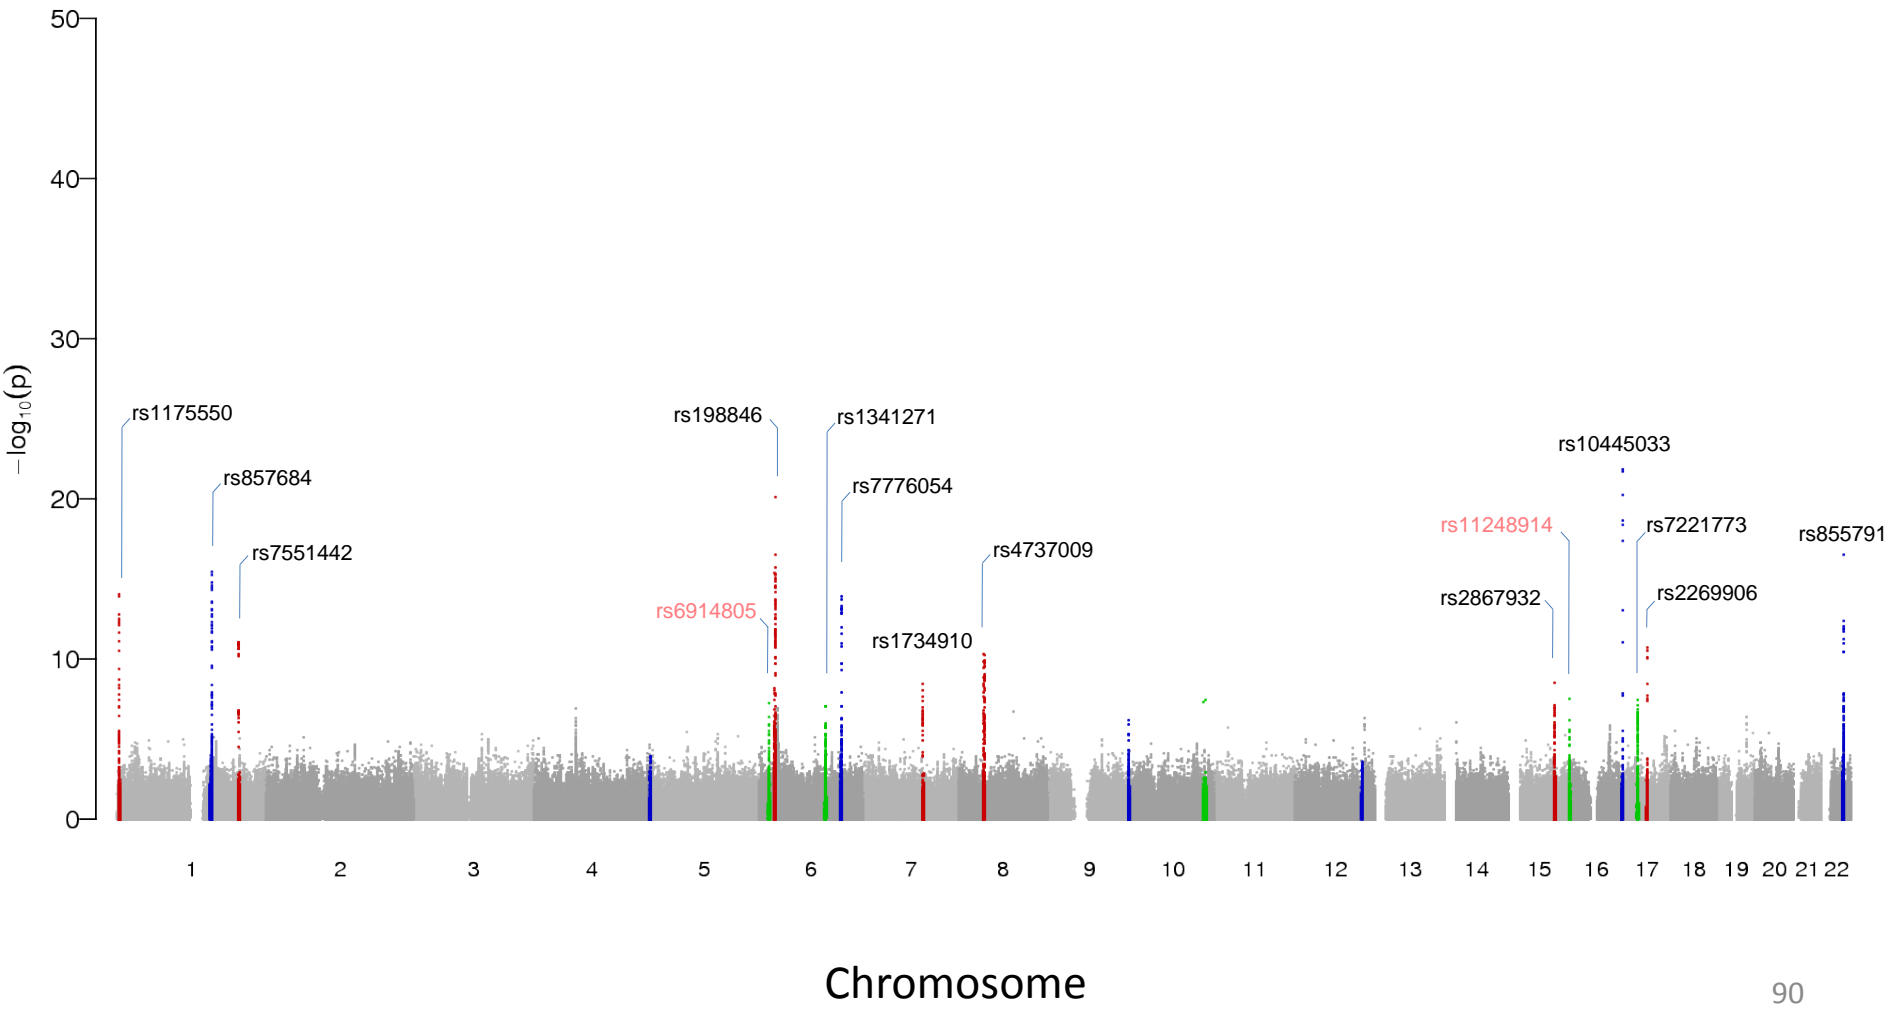

# SF2.4: MCV

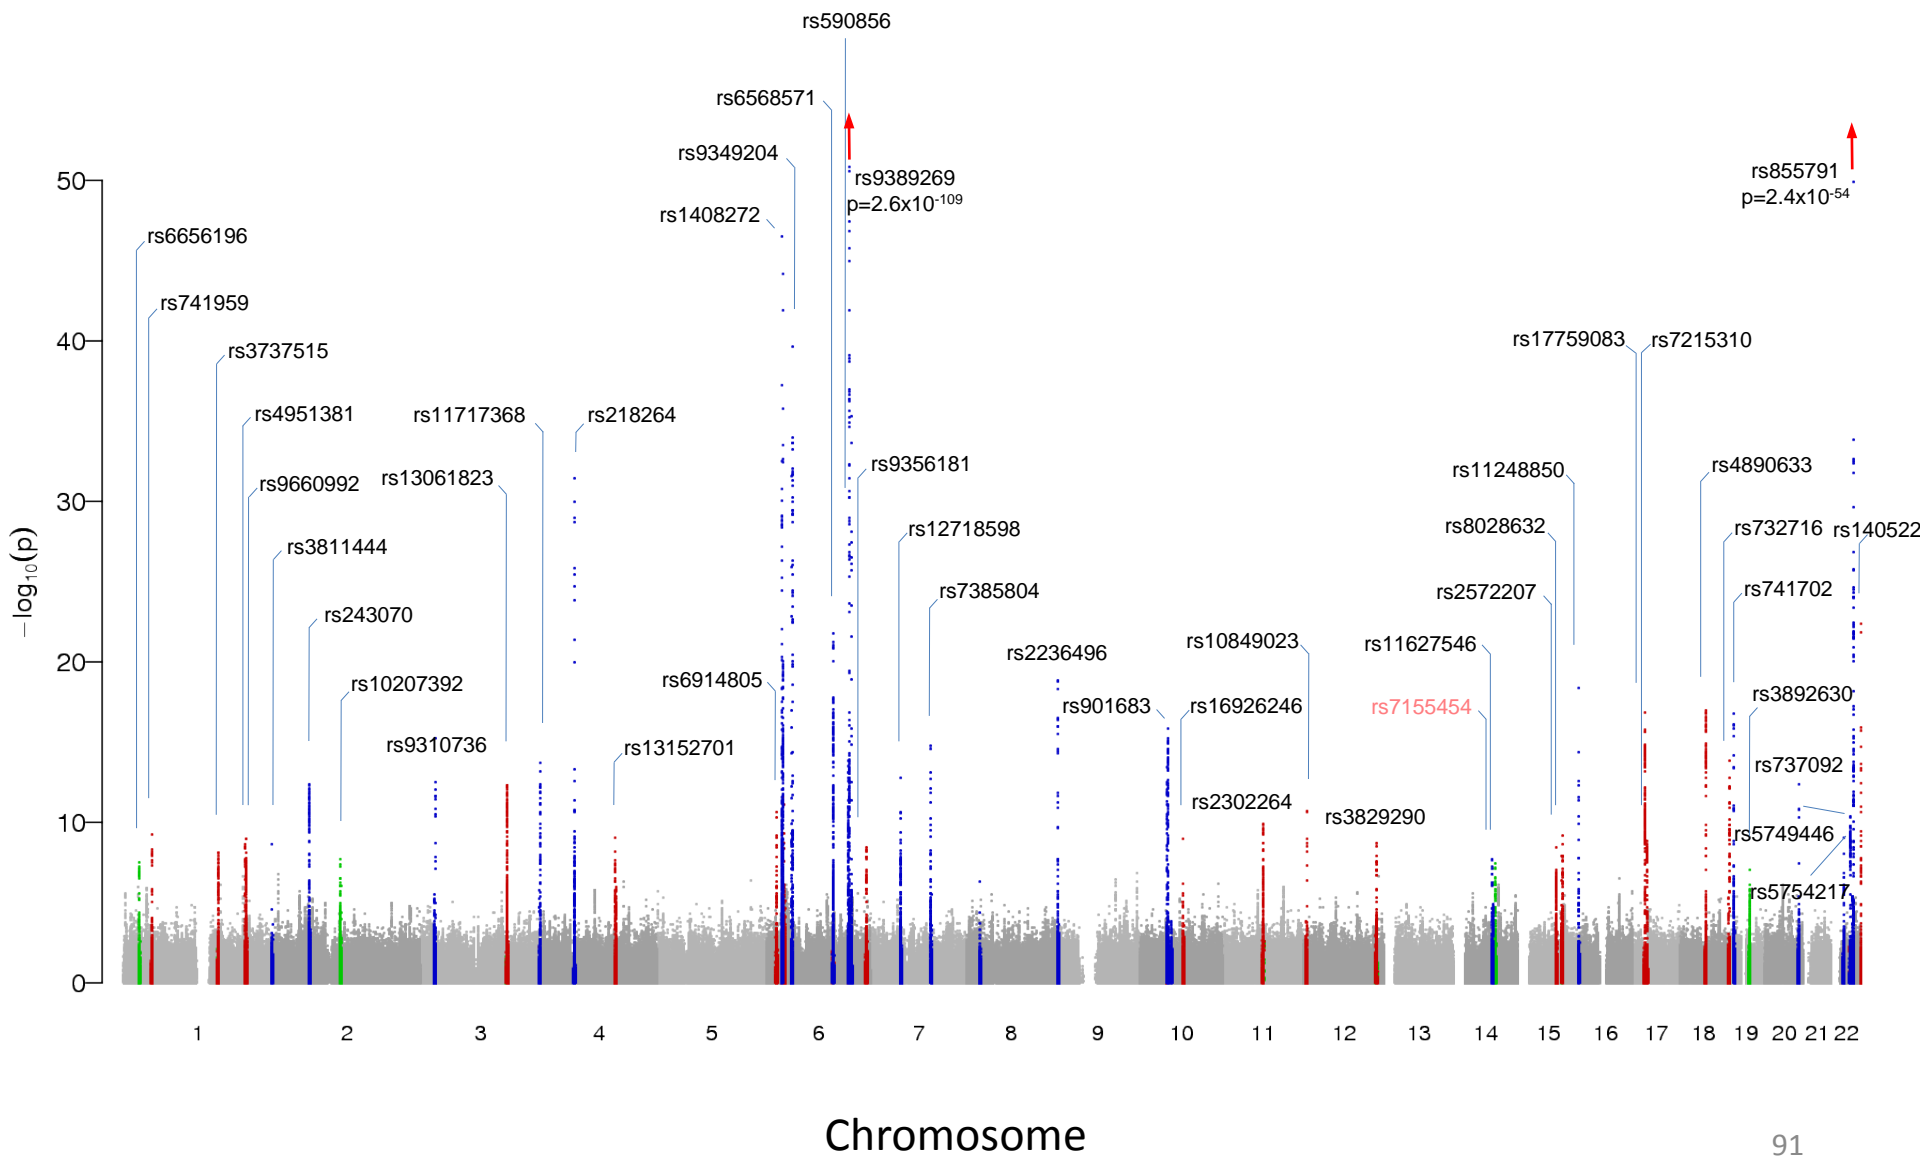

# SF2.5: PCV

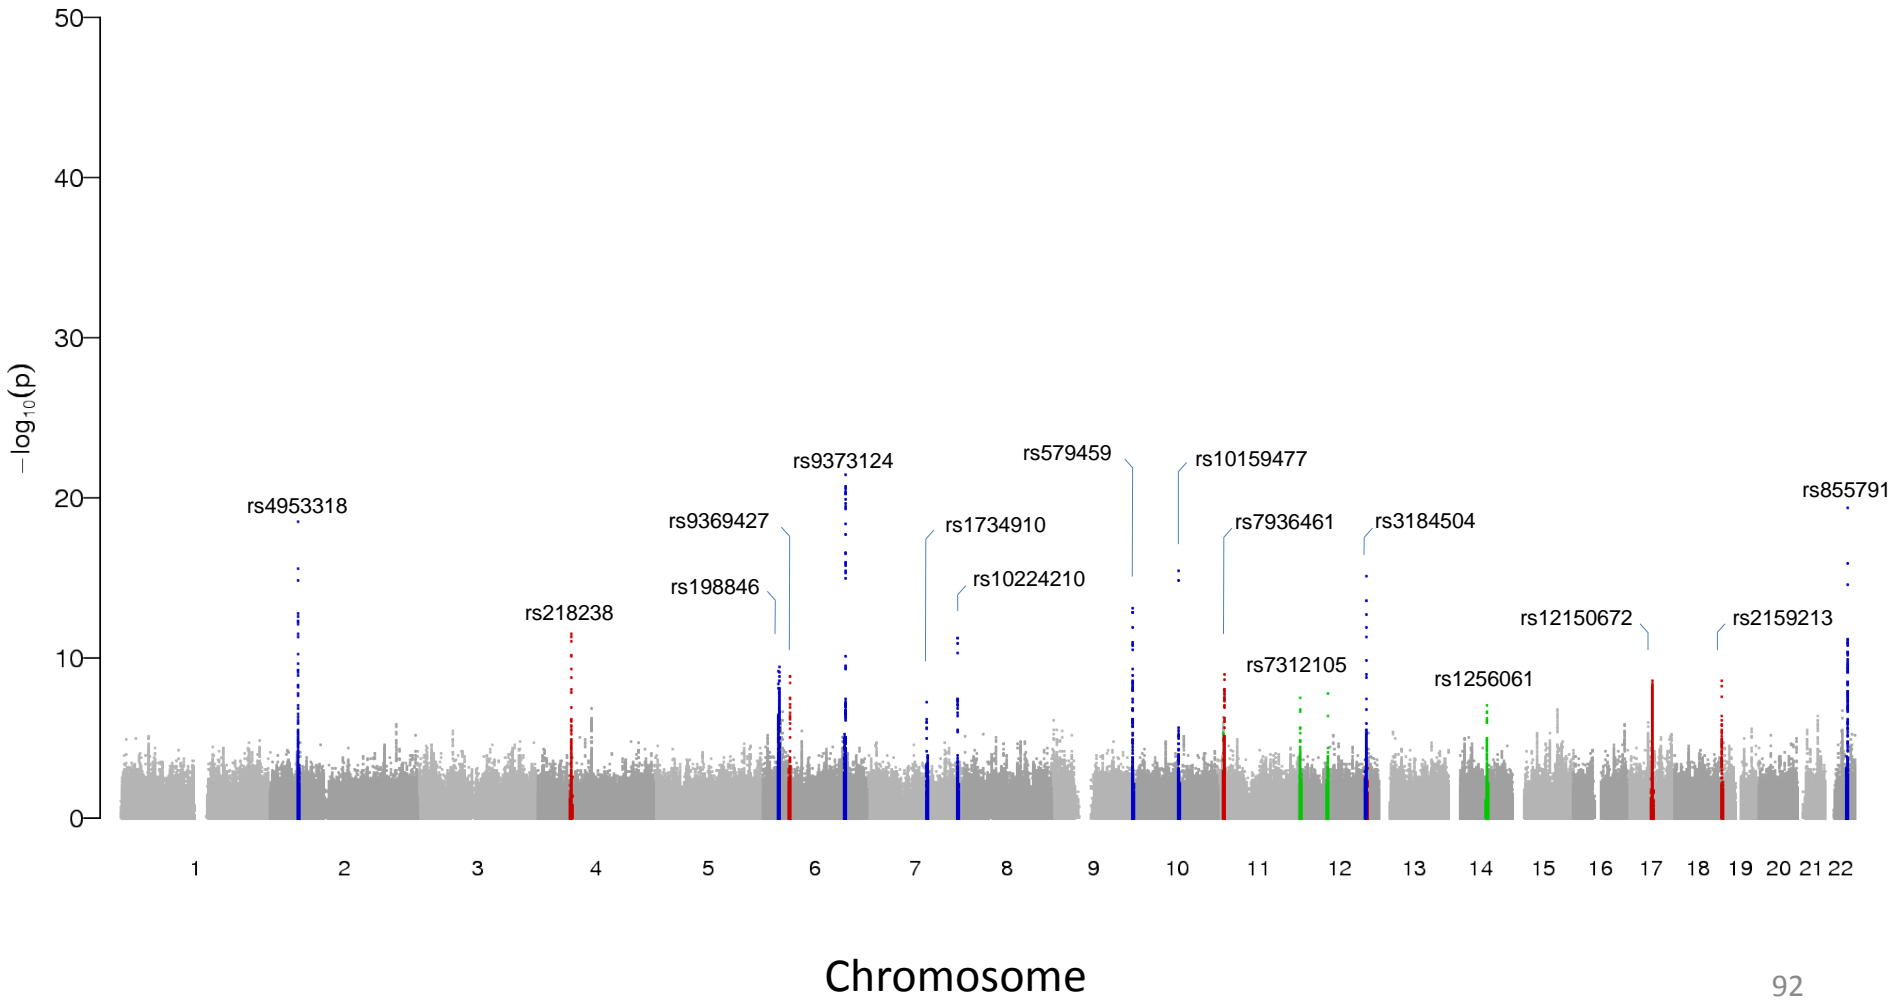

# SF2.6: RBC

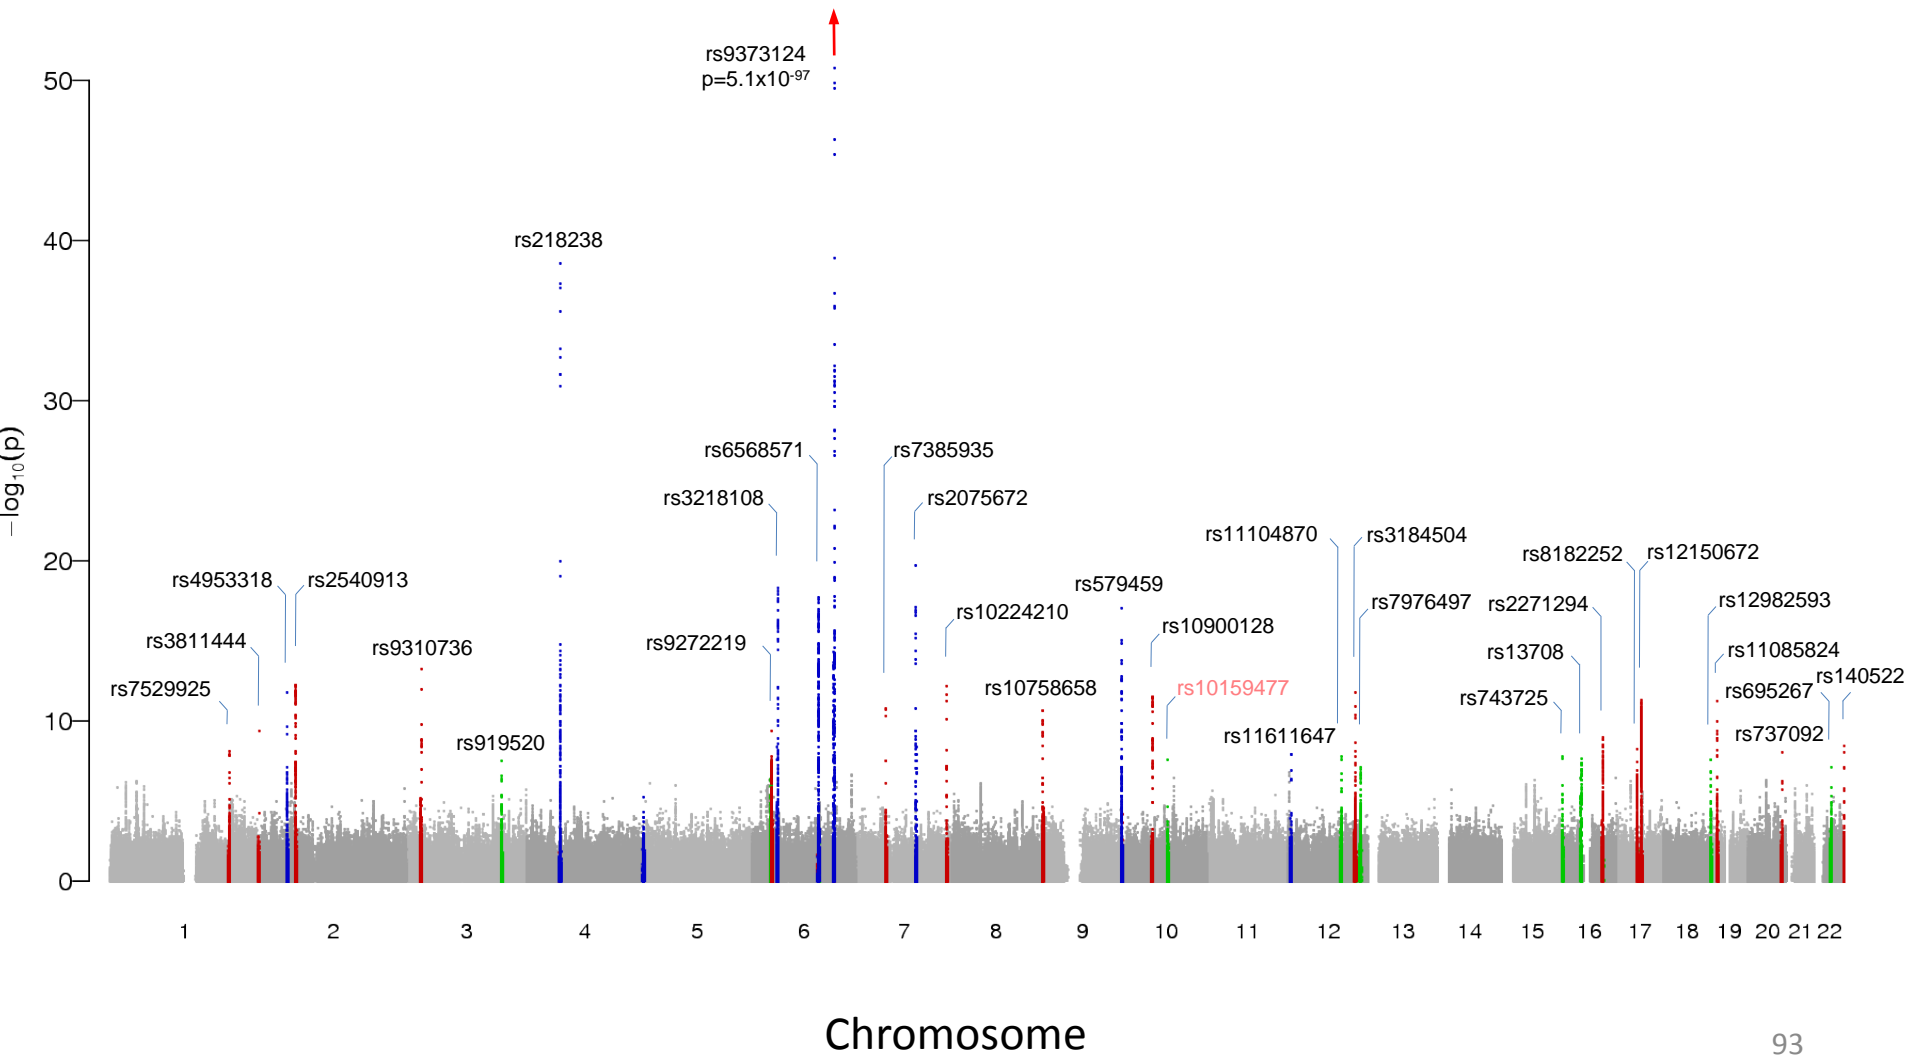



**Supplementary Figure 3.** SF3.1 to 3.75: Regional plots for the red blood cell phenotype sentinel SNPs. At each region pairwise LD with the sentinel SNP is indicated.

### SF3.1: 1p36 - rs1175550 - MCHC

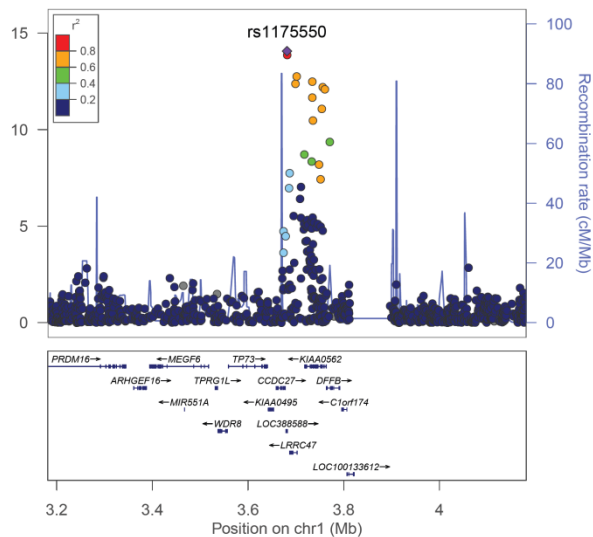

### SF3.2: 1p34 - rs3916164 - MCH

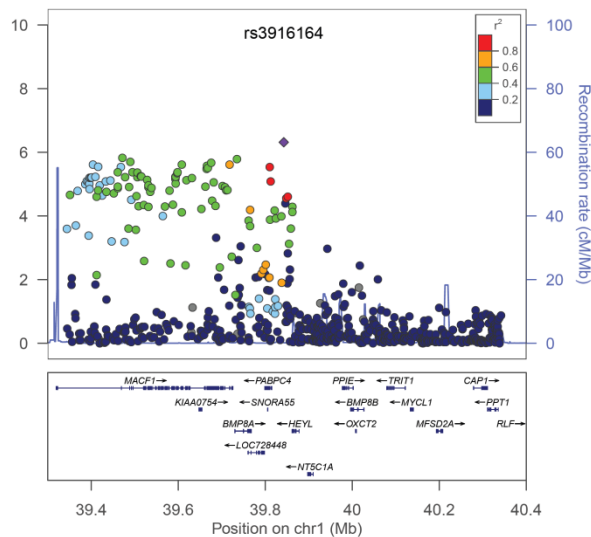

### SF3.3: 1p32 - rs741959 - MCV

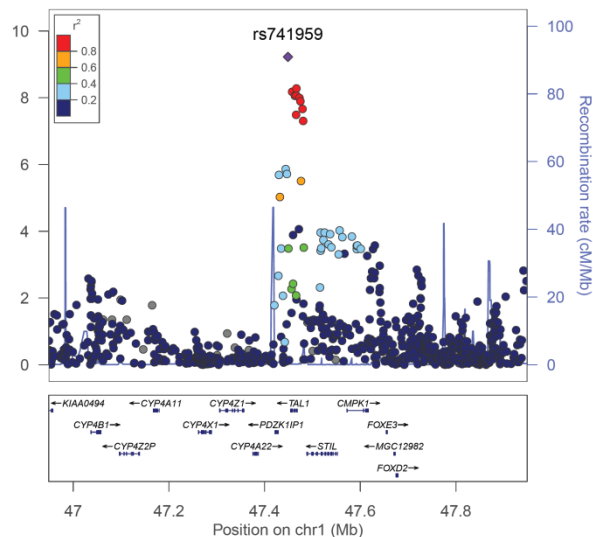

### SF3.4: 1q23 - rs857684 - MCHC

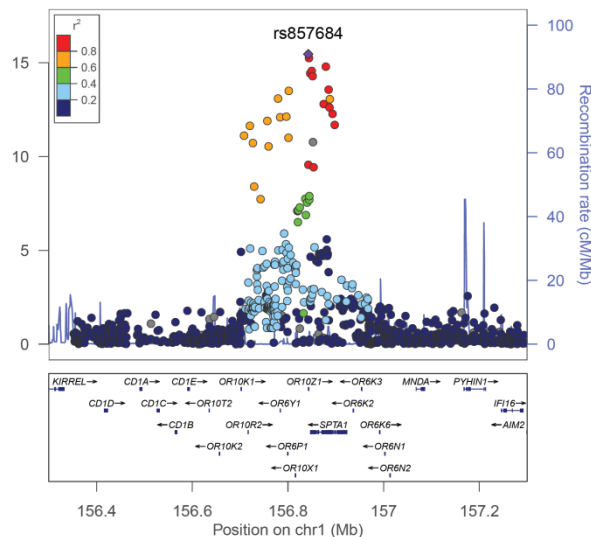

### SF3.5: 1q32 - rs7529925 - RBC

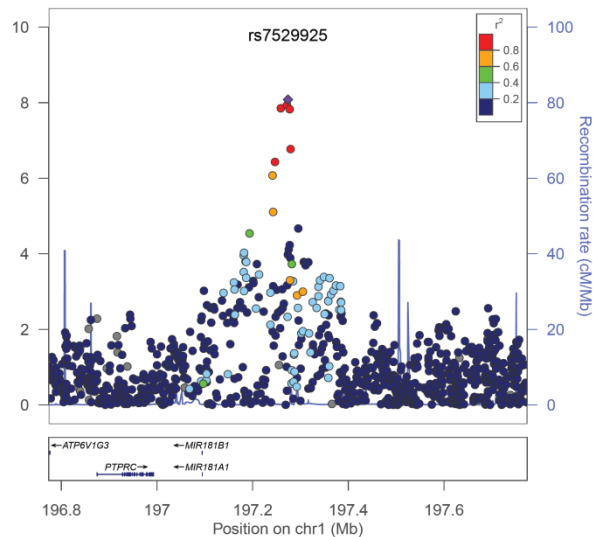

### SF3.6: 1q32 - rs7551442 - MCHC

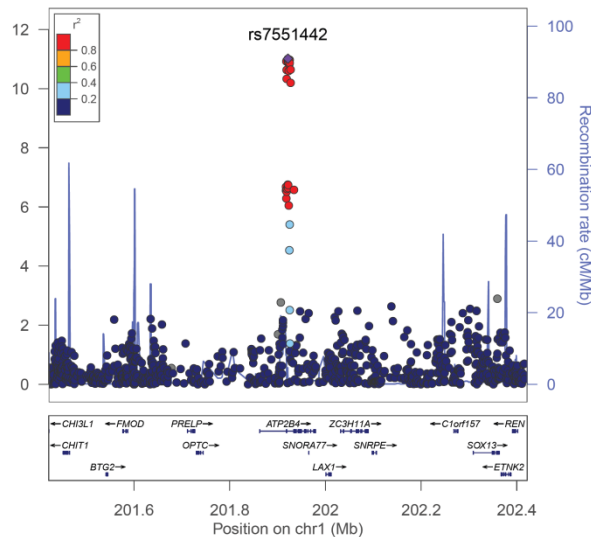

### SF3.7: 1q32 - rs9660992 - MCH

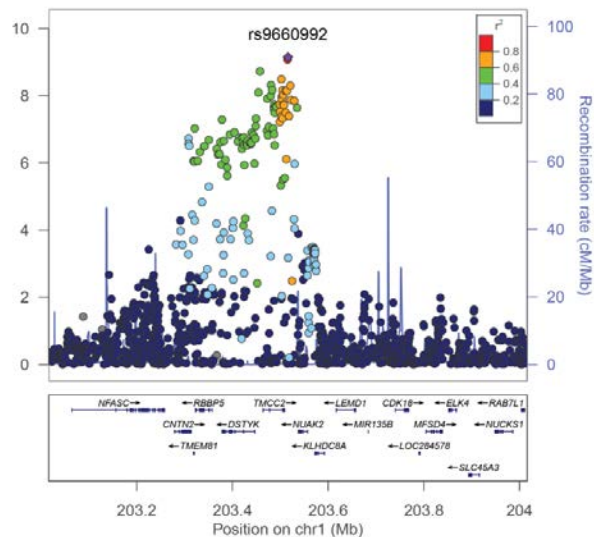

### SF3.8: 1q44 - rs3811444 - RBC

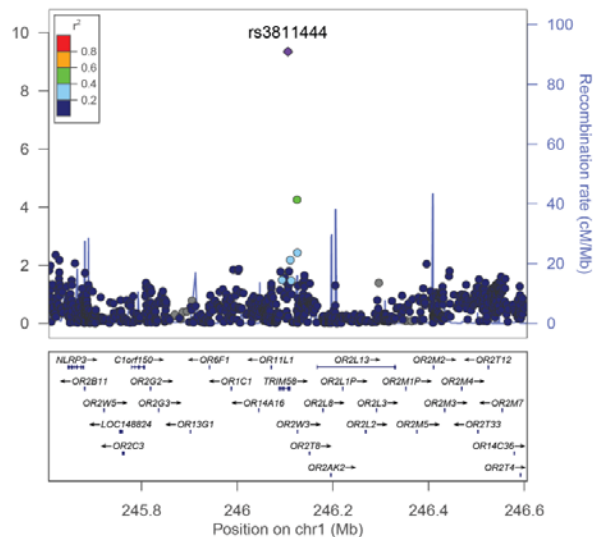

### SF3.9: 2p21 - rs4953318 - PCV

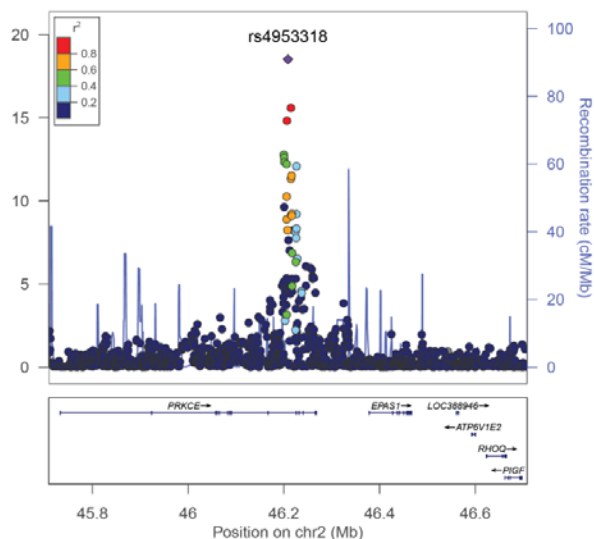

### SF3.10: 2p16 - rs243070 - MCV

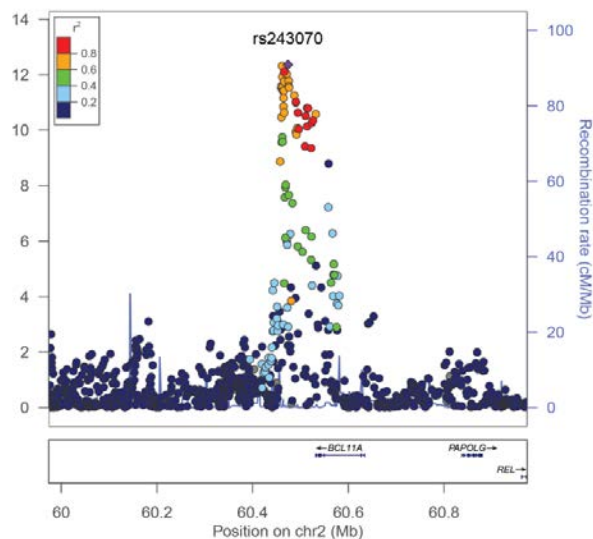

### SF3.11: 2q13 - rs10207392 - MCV

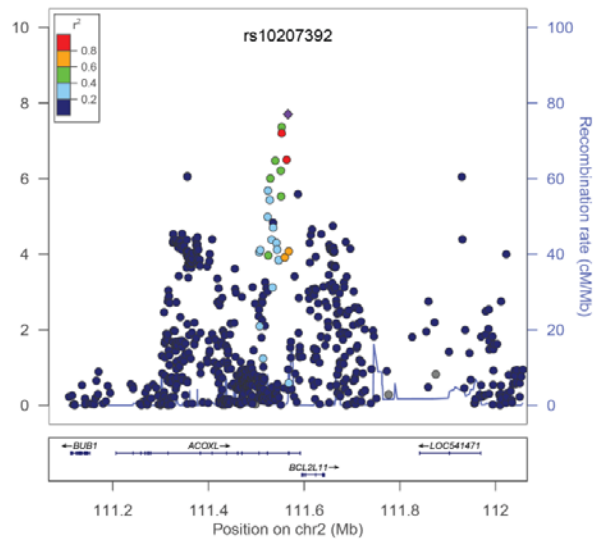

### SF3.12: 3p24 - rs9310736 - MCV

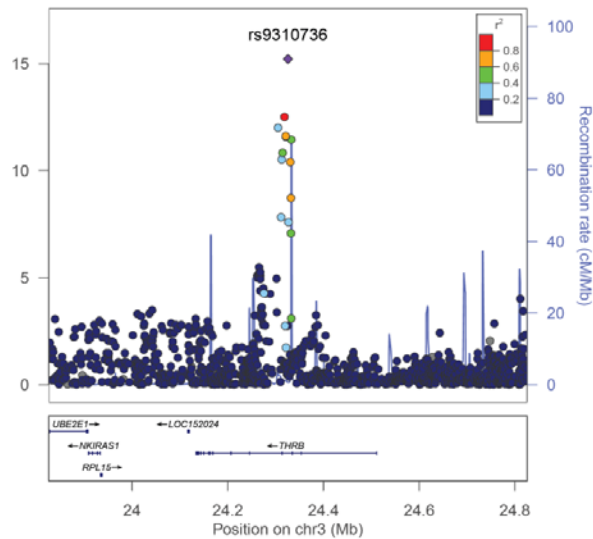

### SF3.13: 3q22 - rs6776003 - MCV

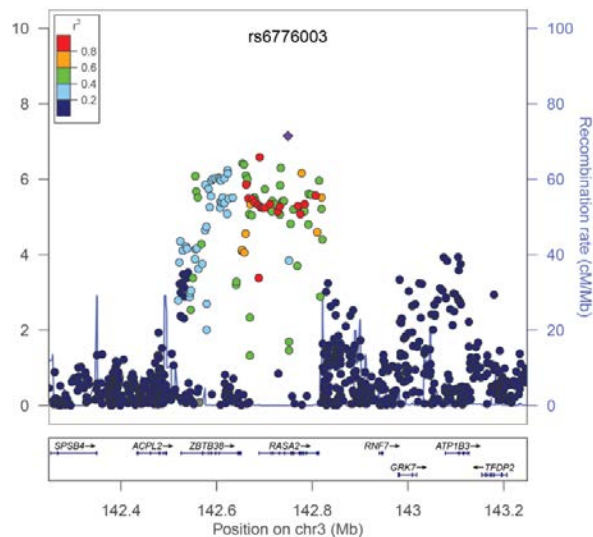

### SF3.14: 3q23 - rs13061823 - MCV

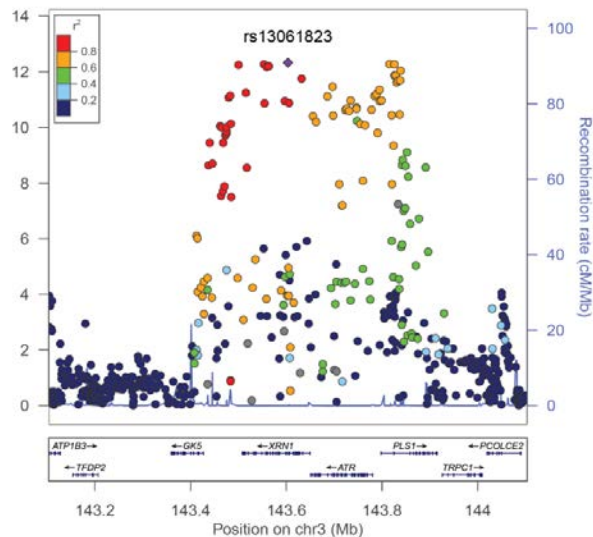

### SF3.15: 3q29 - rs11717368 - MCH

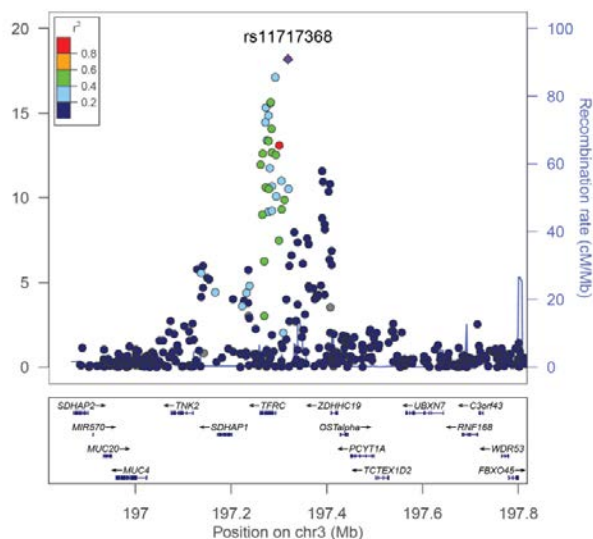

### SF3.16: 4q11 - rs218238 - RBC

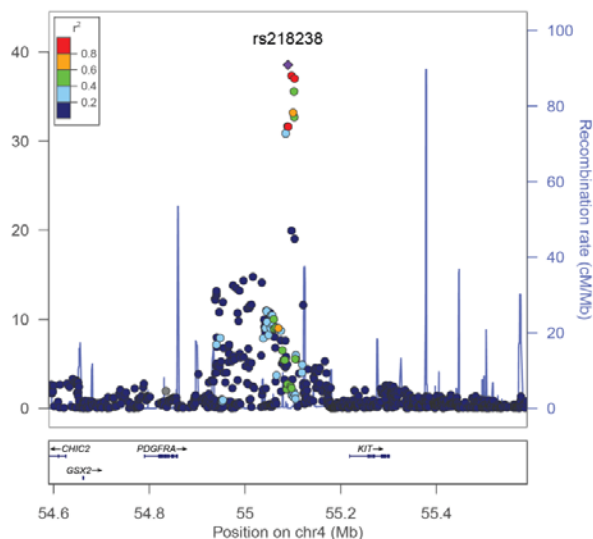

### SF3.17: 4q27 - rs13152701 - MCV

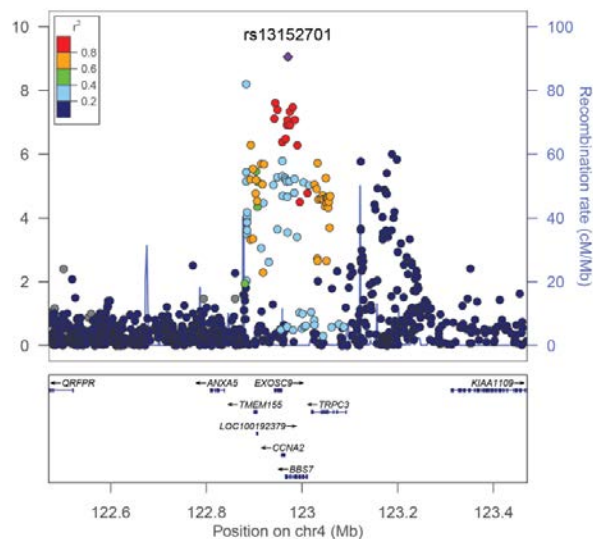

### SF3.18: 6p23 - rs6914805 - MCH

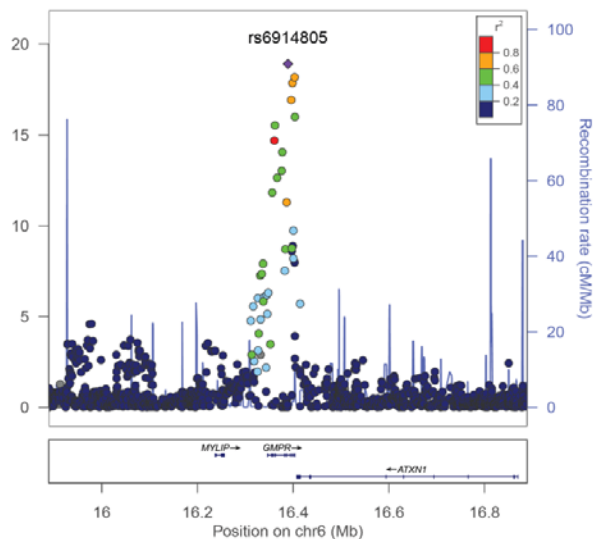

### SF3.19: 6p21 - rs1408272 - MCH

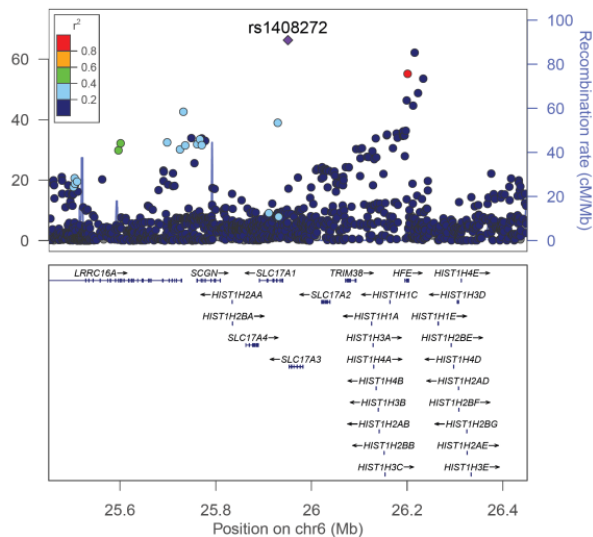

### SF3.20: 6p22 - rs13219787 - MCH

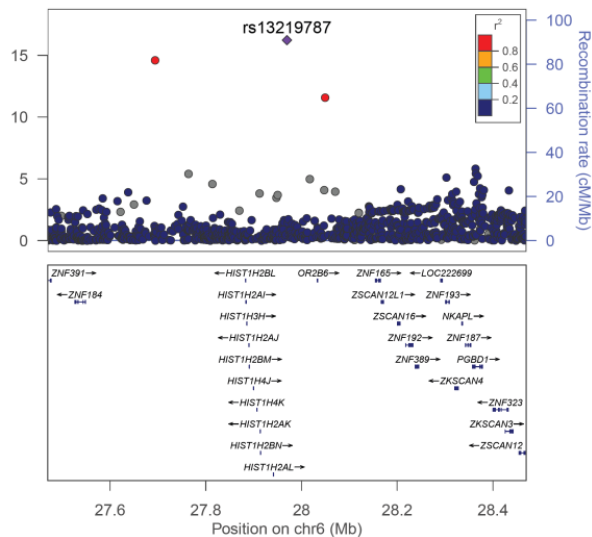

### SF3.21: 6p22 - rs2097775 - HB

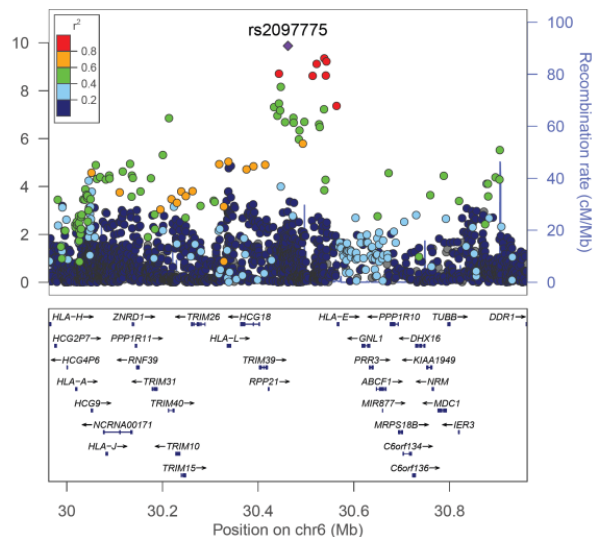

### SF3.22: 6p21 - rs9272219 - RBC

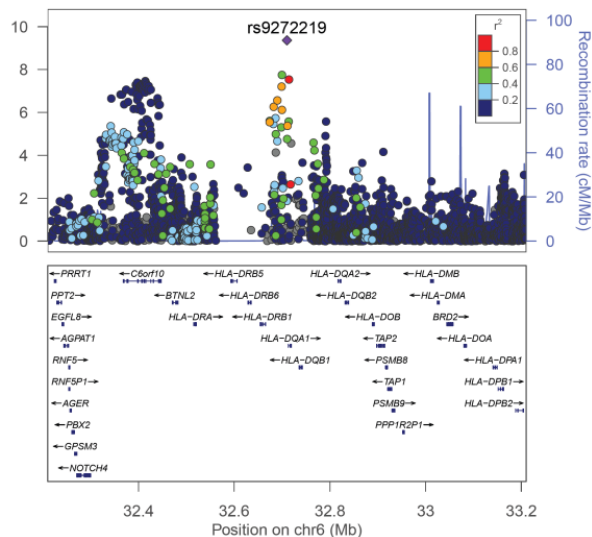

### SF3.23: 6p21 - rs9349204 - MCV

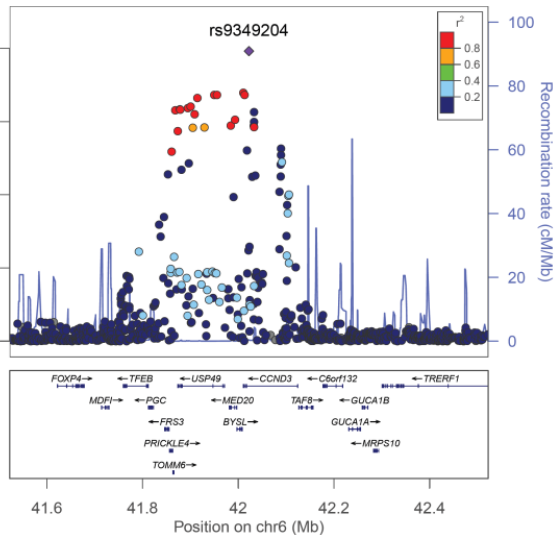

### SF3.24: 6p12 - rs9369427 - HB

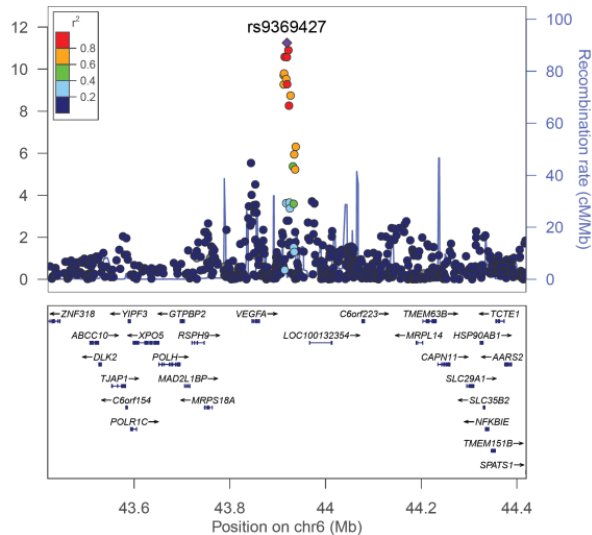



### SF3.25: 6q21 - rs1008084 - MCH

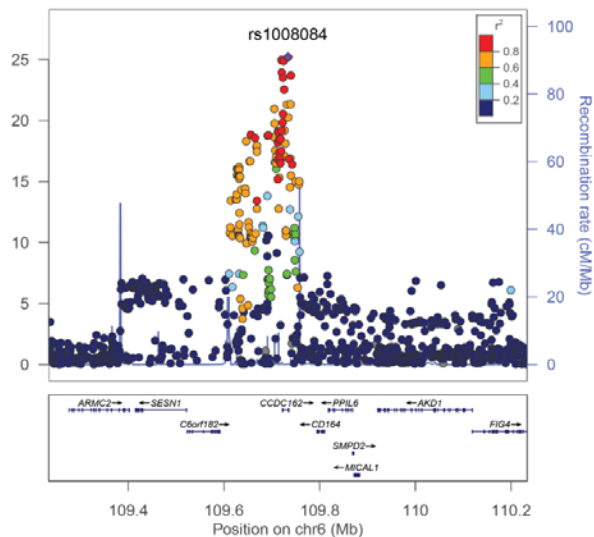

### SF3.26: 6q23 - rs9389269 - MCV

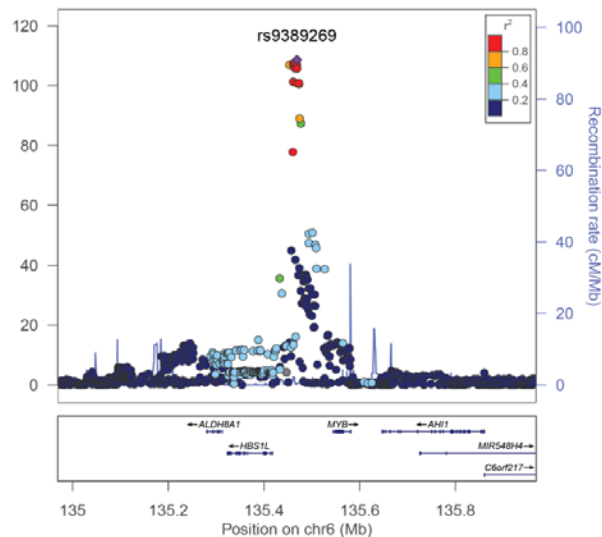

### SF3.27: 6q24 - rs590856 - MCV

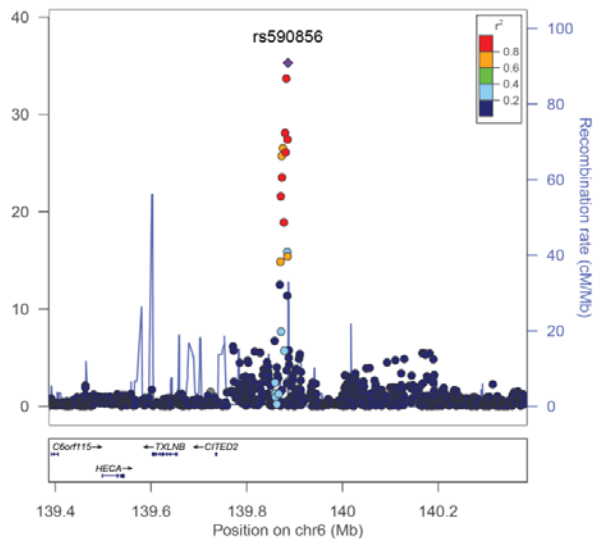

### SF3.28: 6q26 - rs736661 - MCH

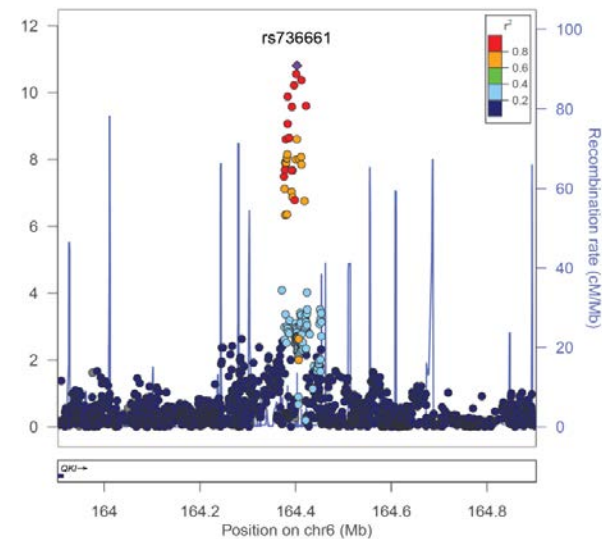

### SF3.29: 7p13 - rs12718598 - MCV

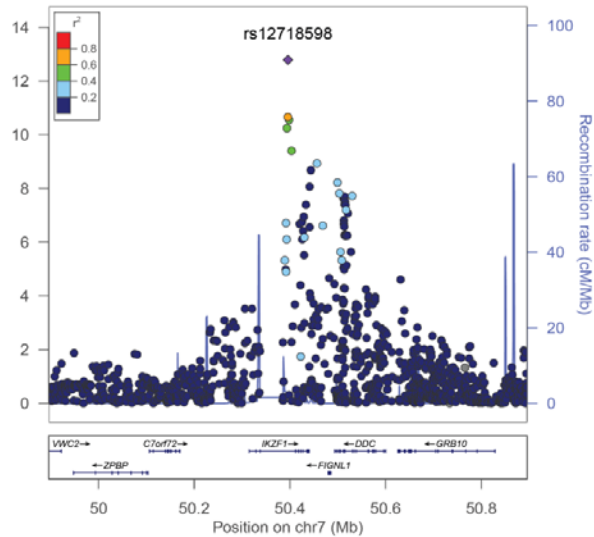

### SF3.30: 7q22 - rs2075672 - RBC

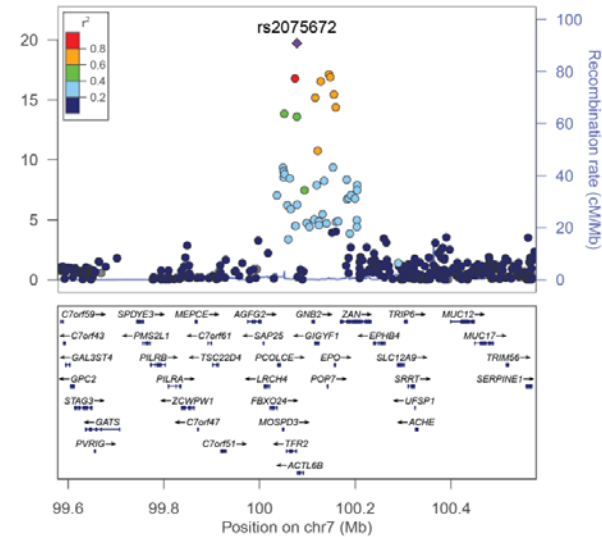

### SF3.31: 7q36 - rs10480300 - HB

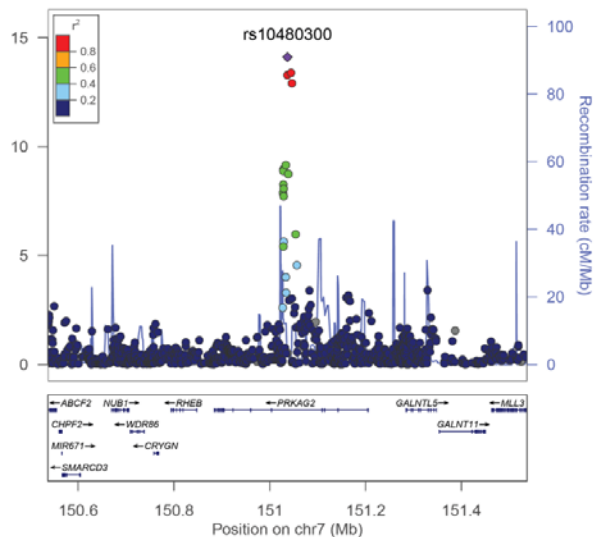

### SF3.32: 8p11 - rs4737009 - MCHC

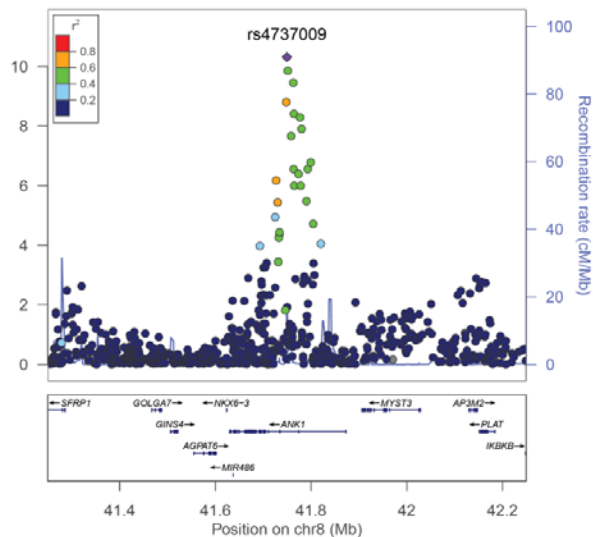

### SF3.33: 8p11 - rs6987853 - MCHC

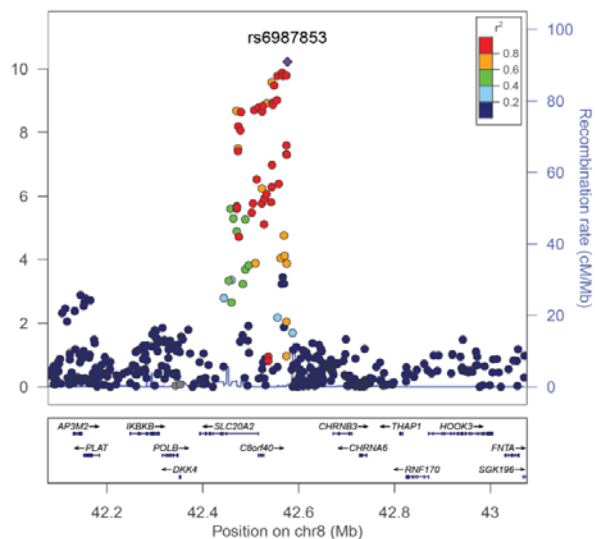

### SF3.34: 9p24 - rs2236496 - MCV

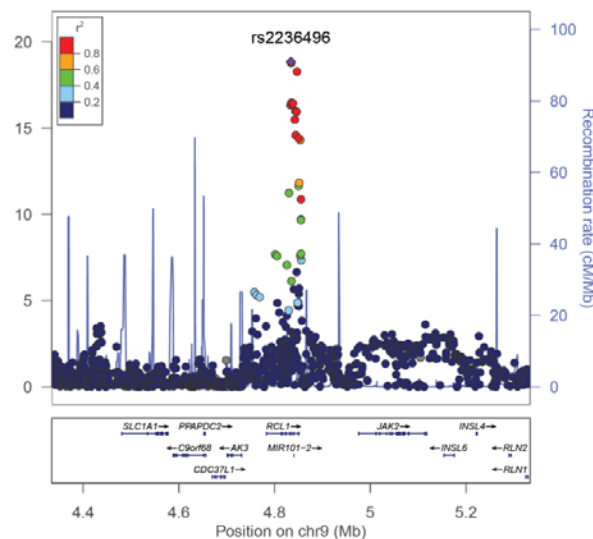

### SF3.35: 9q34 - rs579459 - RBC

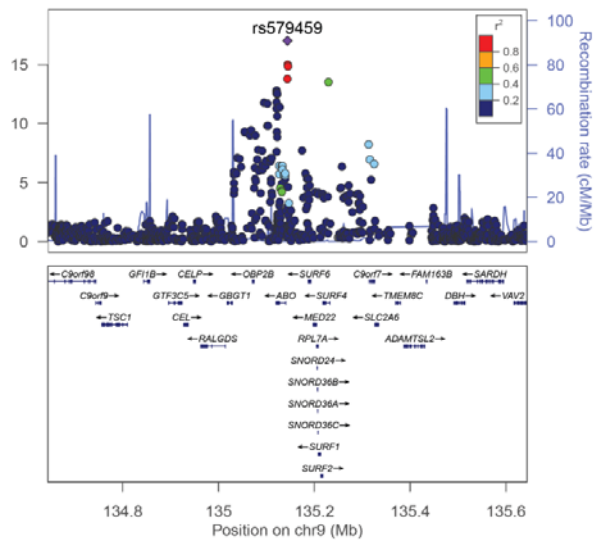

### SF3.36: 10q11 - rs901683 - MCV

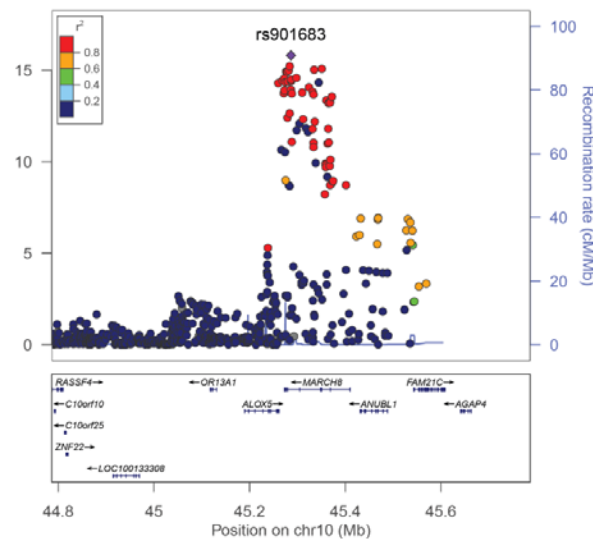

### SF3.37: 10q22 - rs10159477 - HB

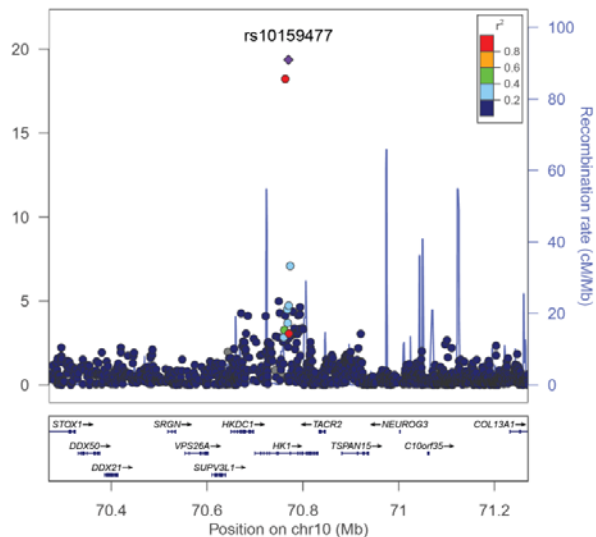

### SF3.38: 10q24 - rs11190134 - MCH

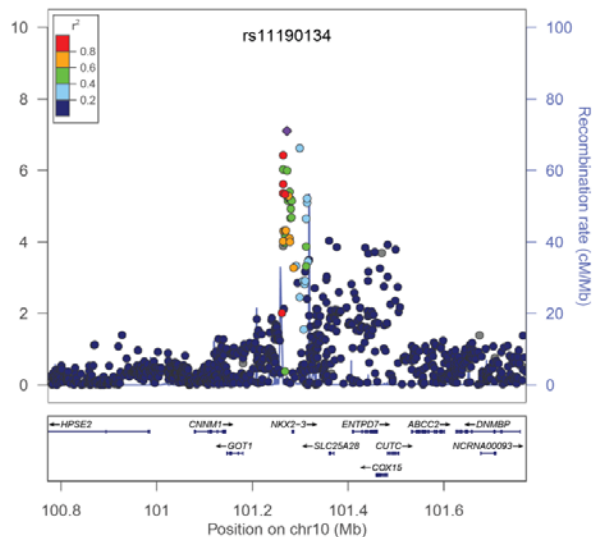

### SF3.39: 11p15 - rs11042125 - HB

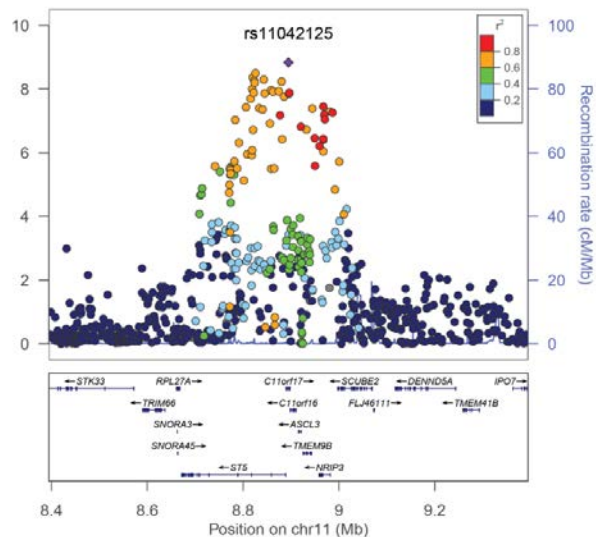

### SF3.40: 11p15 - rs7936461 - PCV

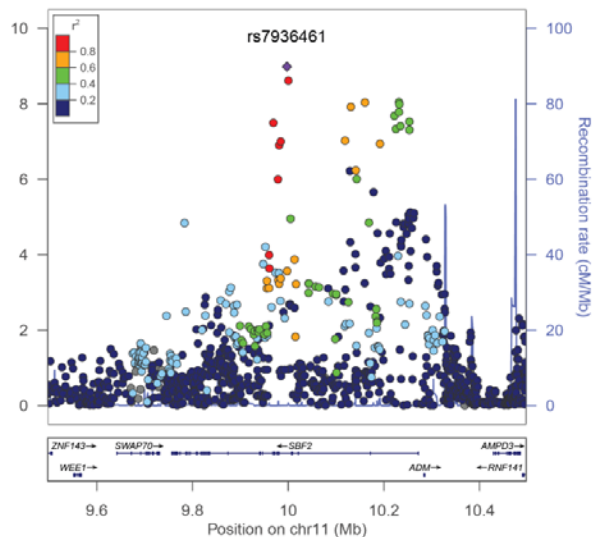

### SF3.41: 11q13 - rs2302264 - MCV

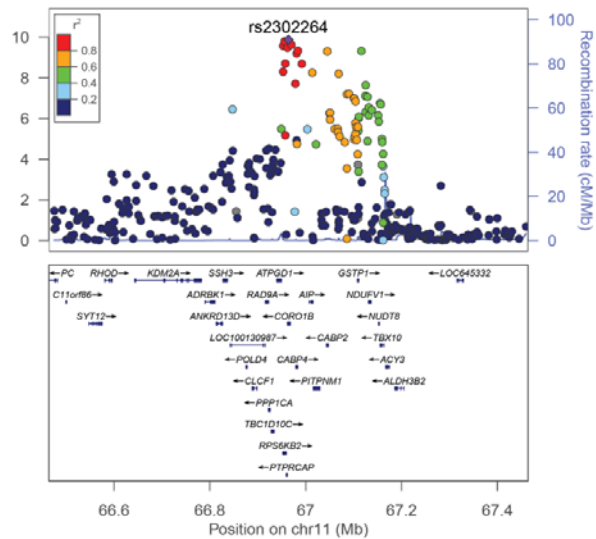

### SF3.42: 11q13 - rs7125949 - HB

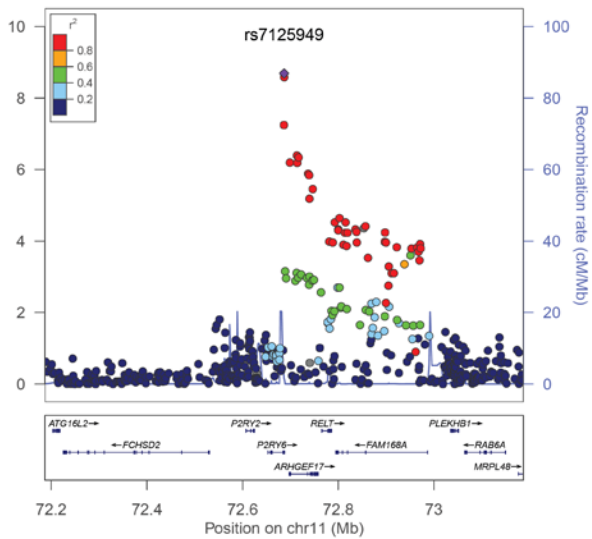



### SF3.43: 12p13 - rs7312105 - PCV

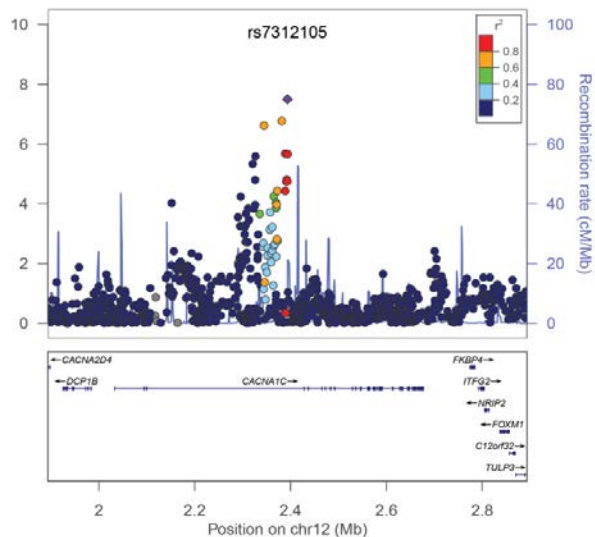

### SF3.44: 12p13 - rs10849023 - MCH

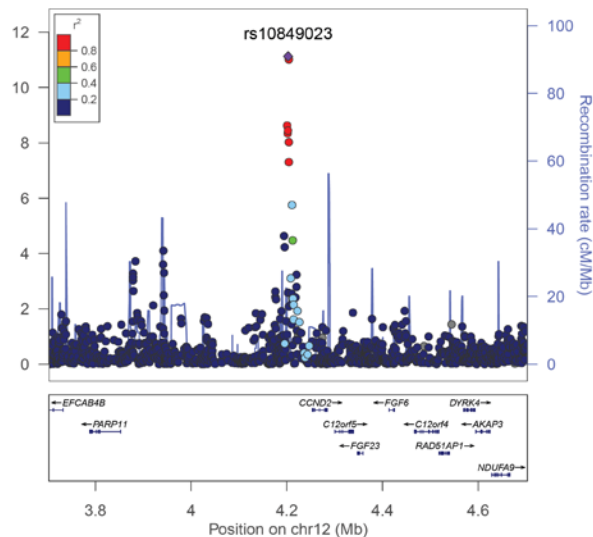

### SF3.45: 12q22 - rs11104870 - RBC

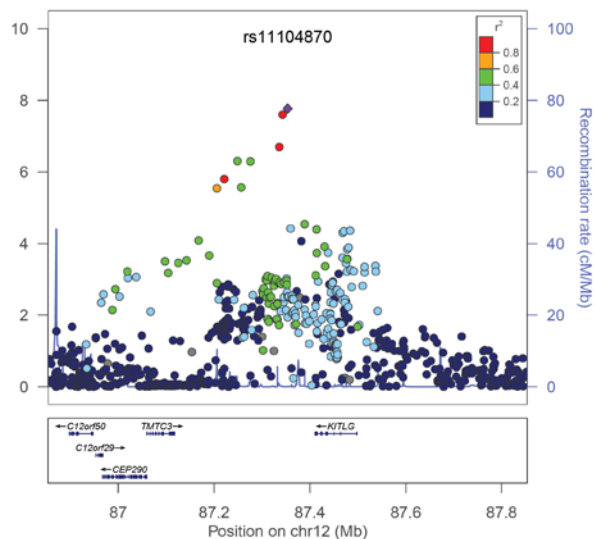

### SF3.46: 12q24 - rs3184504 - HB

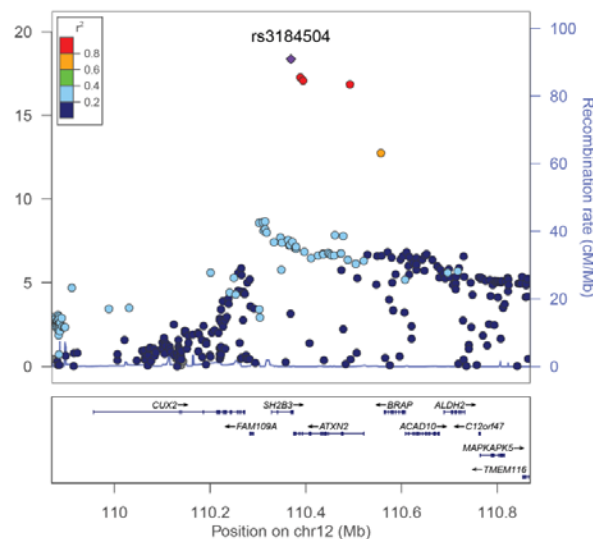

### SF3.47: 12q24 - rs3829290 - MCV

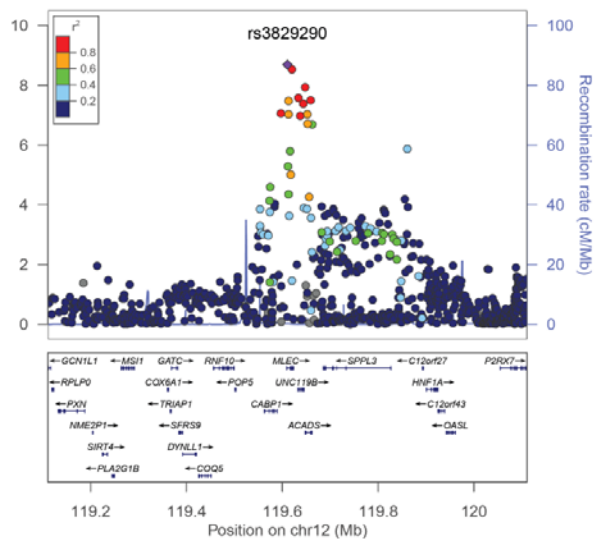

### SF3.48: 14q23 - rs7155454 - MCH

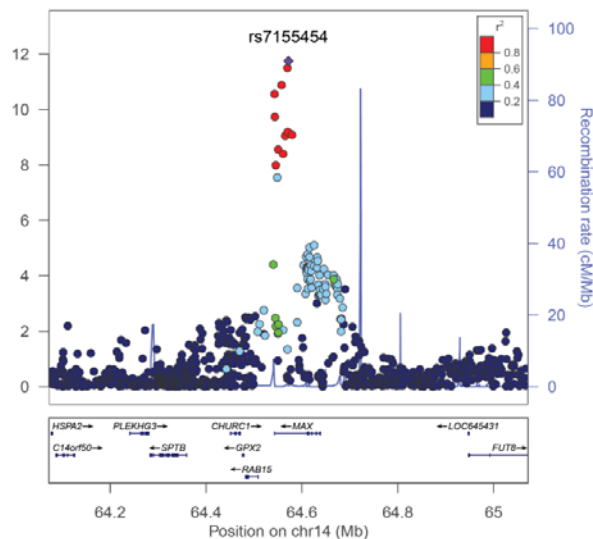

**SF3.49: 14q24 - rs11627546 - MCV**

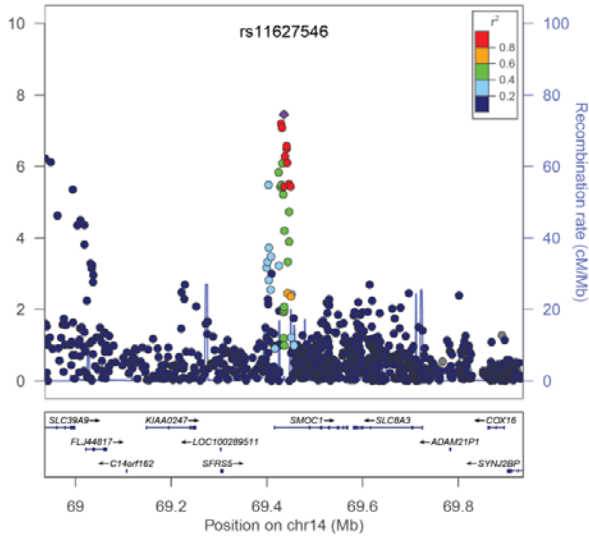

**SF3.50: 14q32 - rs17616316 - MCH**

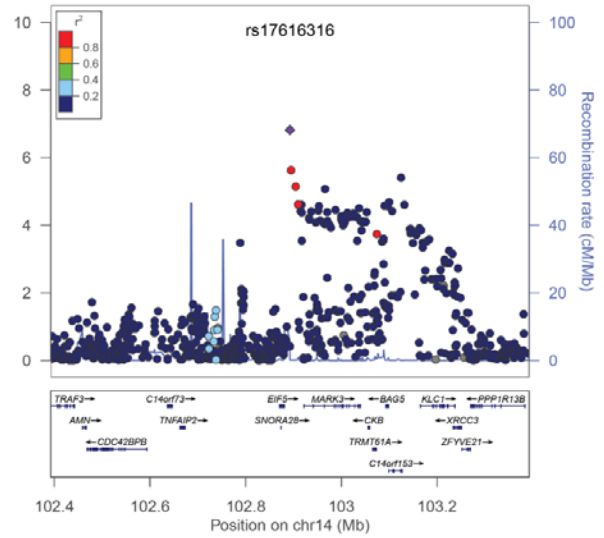

**SF3.51: 15q21 - rs1532085 - HB**

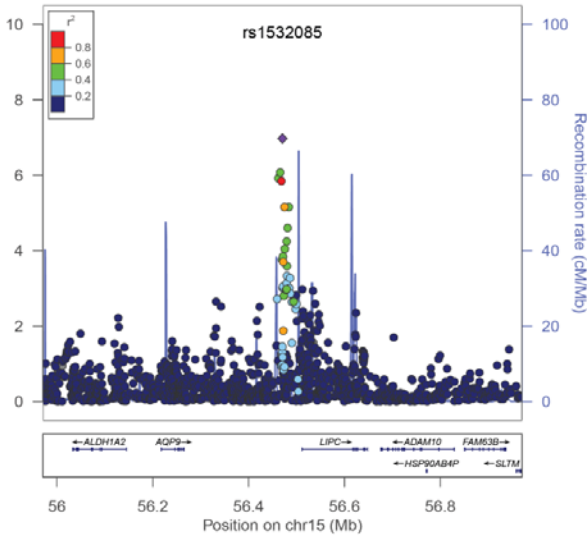

**SF3.52: 15q22 - rs2572207 - MCV**

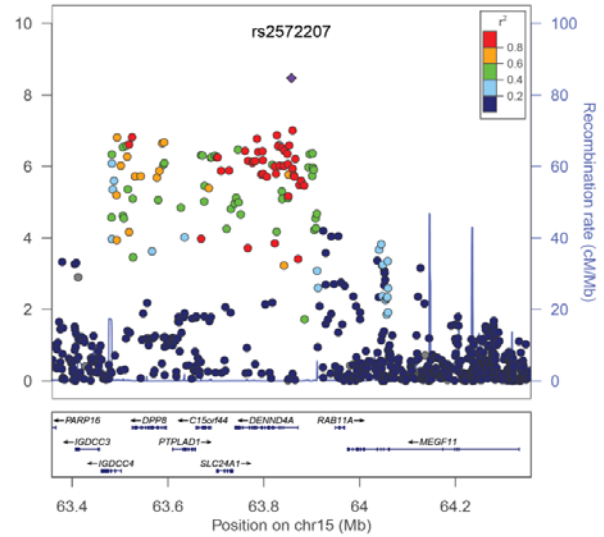

**SF3.53: 15q24 - rs8028632 - MCV**

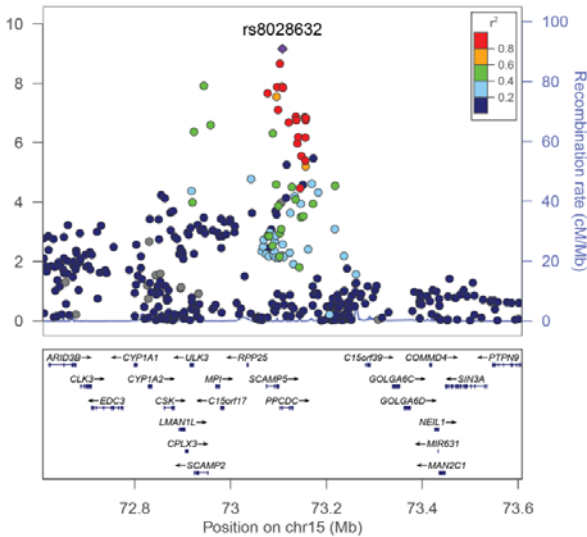

**SF3.54: 15q24 - rs11072566 - HB**

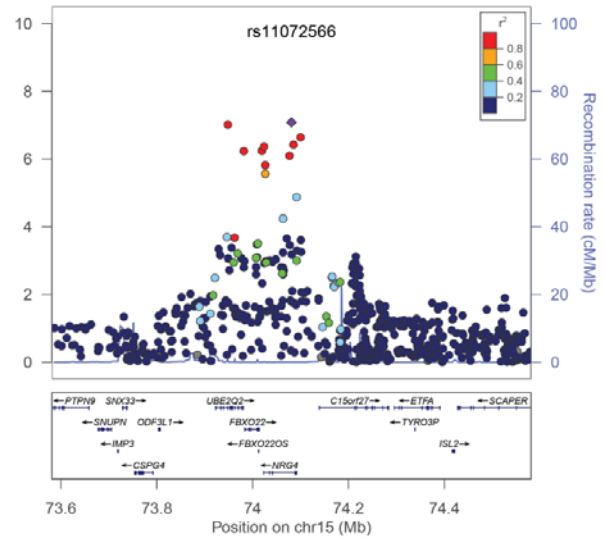

### SF3.55: 15q25 - rs2867932 - MCHC

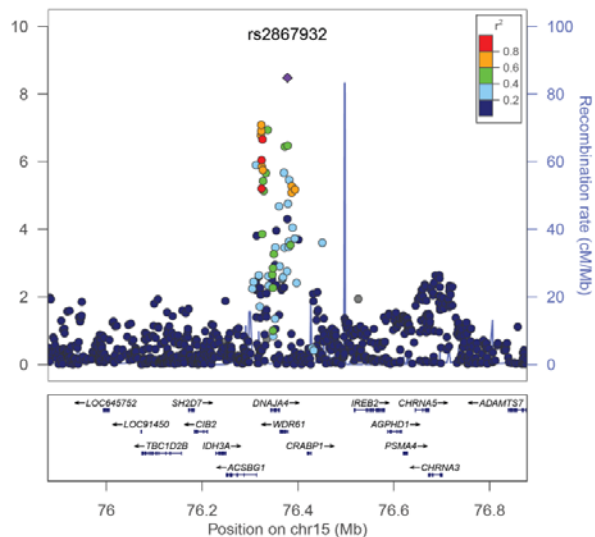

### SF3.56: 16p11 - rs11248850 - MCH

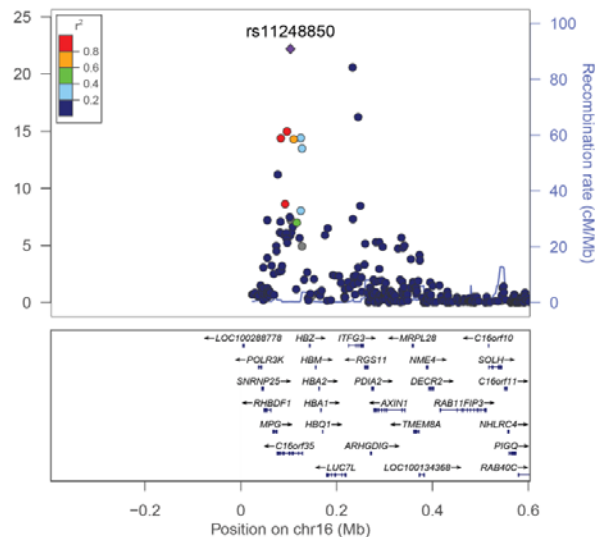

### SF3.57: 16q22 - rs2271294 - RBC

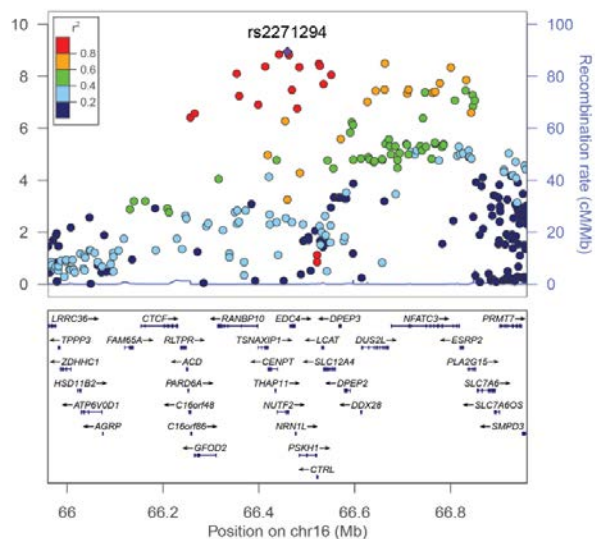

### SF3.58: 16q24 - rs10445033 - MCHC

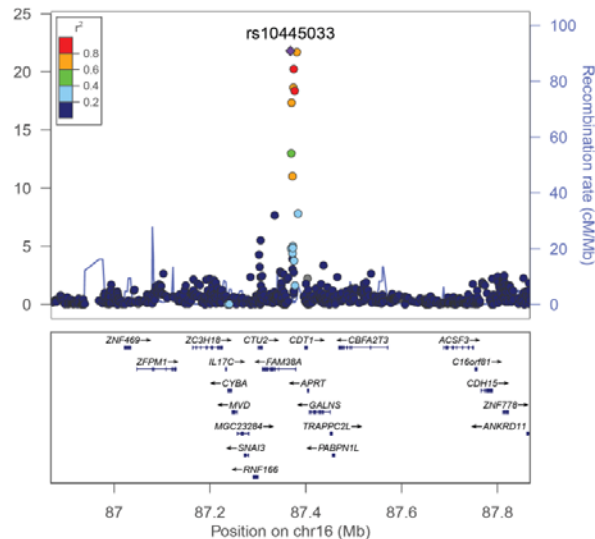

### SF3.59: 17p11 - rs888424 - MCH

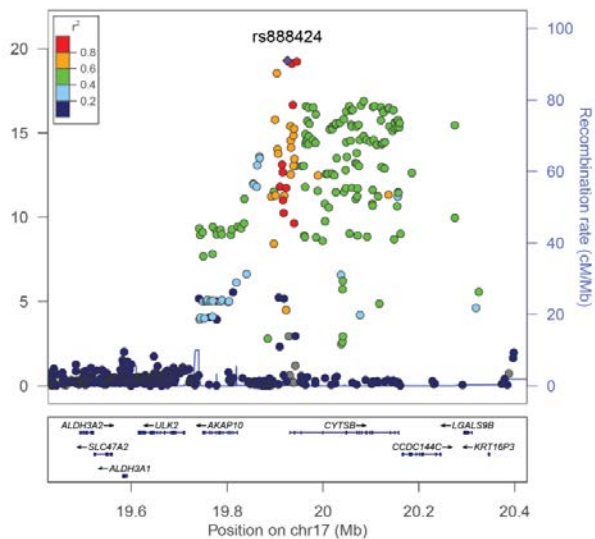

### SF3.60: 17q11 - rs2070265 - MCH

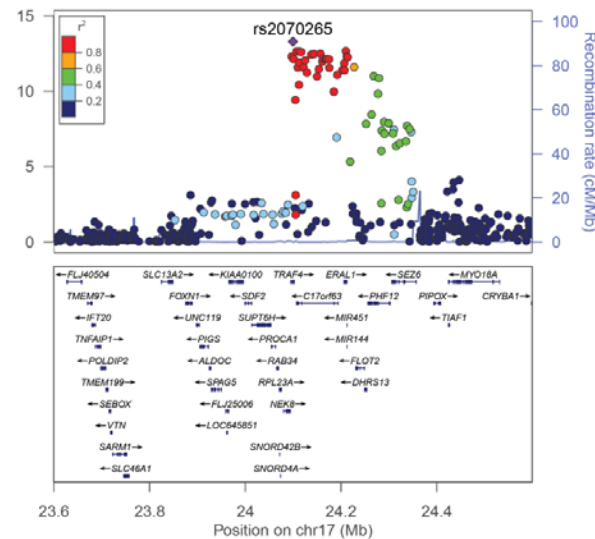

### SF3.61: 17q12 - rs8182252 - RBC

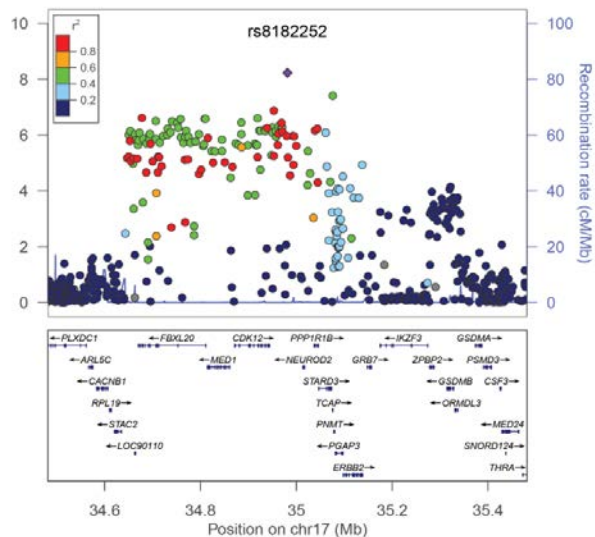

### SF3.62: 17q21 - rs2269906 - MCHC

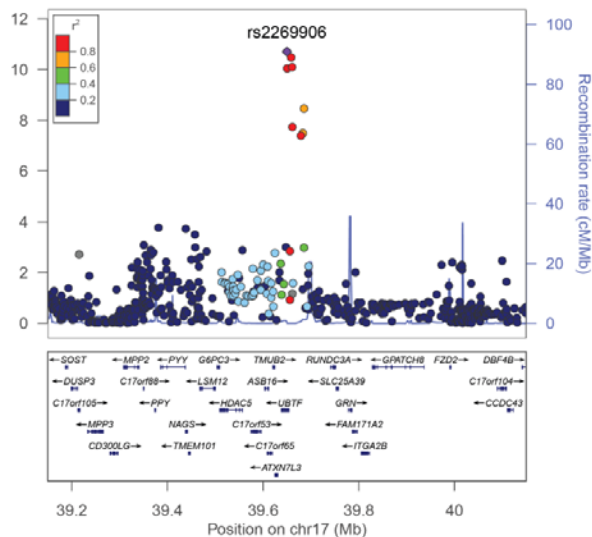

### SF3.63: 17q12 - rs12150672 - RBC

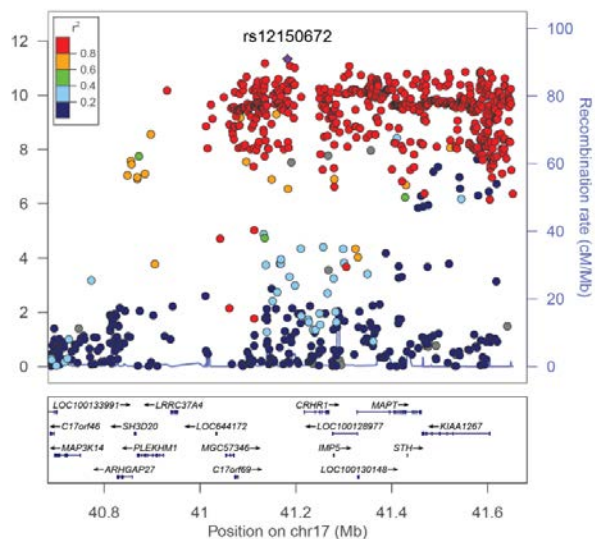

### SF3.64: 17q25 - rs4969184 - HB

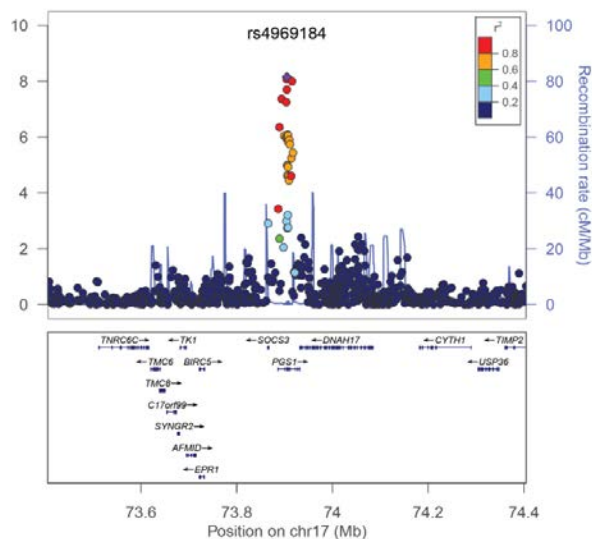

### SF3.65: 18q21 - rs4890633 - MCH

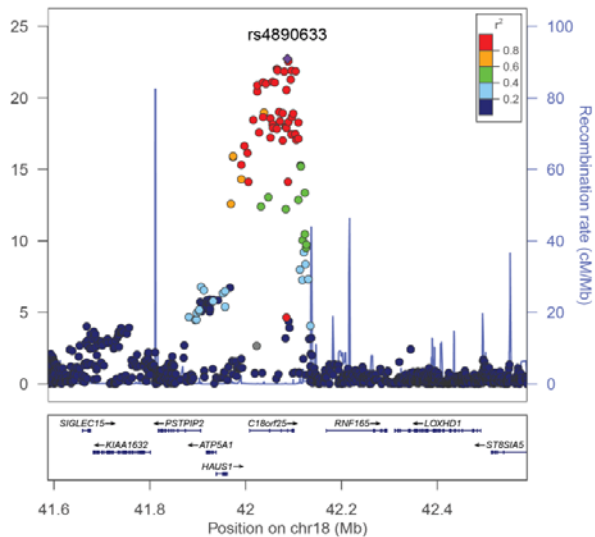

### SF3.66: 19p13 - rs2159213 - HB

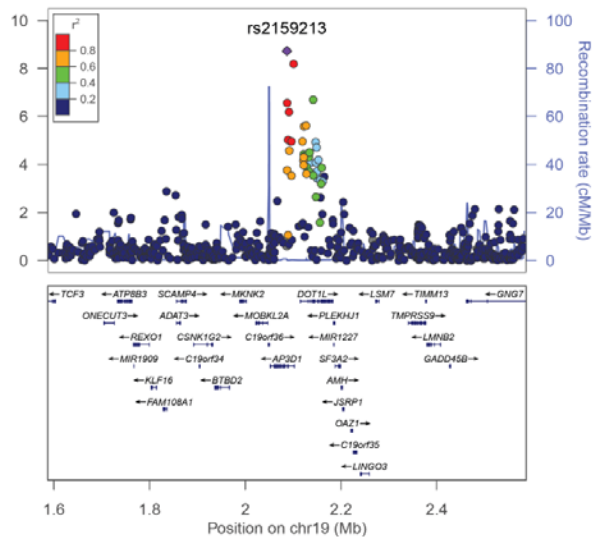



### SF3.67: 19p13 - rs732716 - MCV

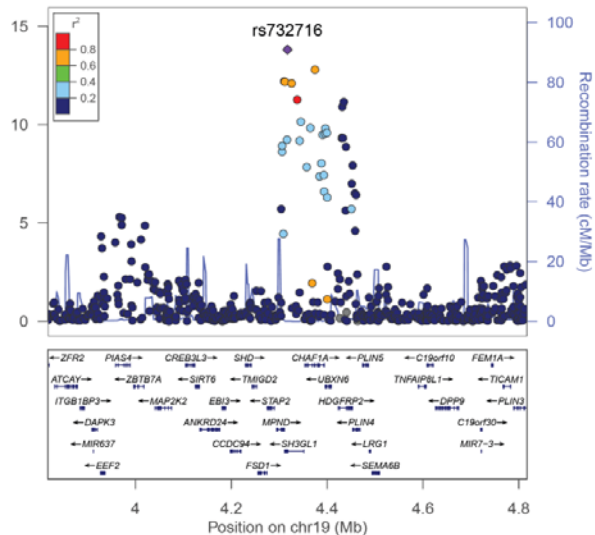

### SF3.68: 19p13 - rs741702 - MCH

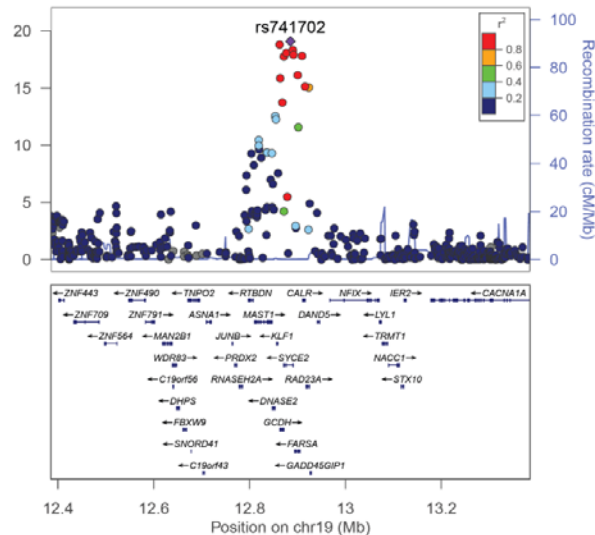

### SF3.69: 19q13 - rs3892630 - MCV

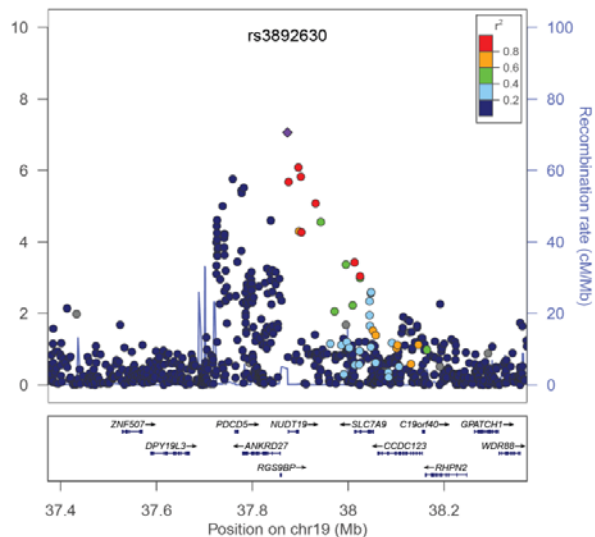

### SF3.70: 20q13 - rs737092 - MCV

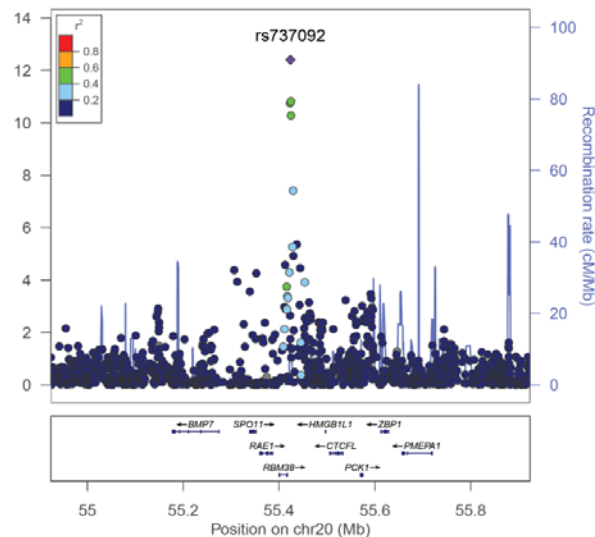

### SF3.71: 21q22 - rs2032314 - PCV

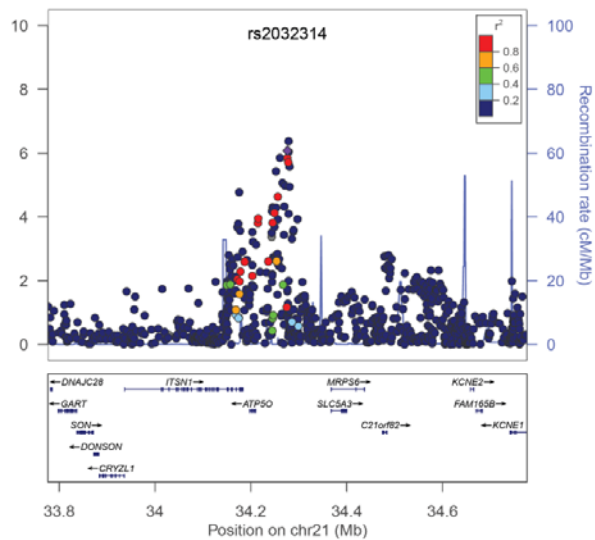

### SF3.72: 22q11 - rs5754217 - MCV

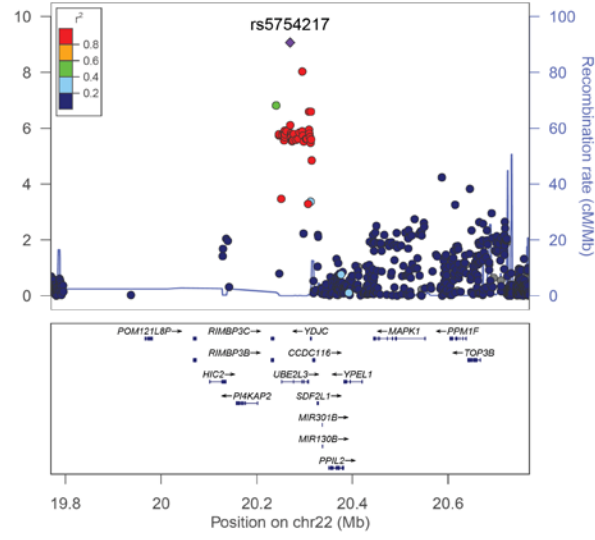

### SF3.73: 22q12 - rs5749446 - MCH

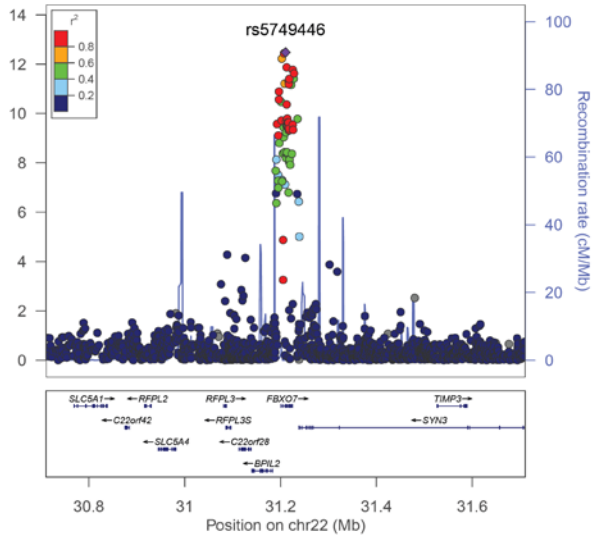

### SF3.74: 22q12 - rs855791 - MCH

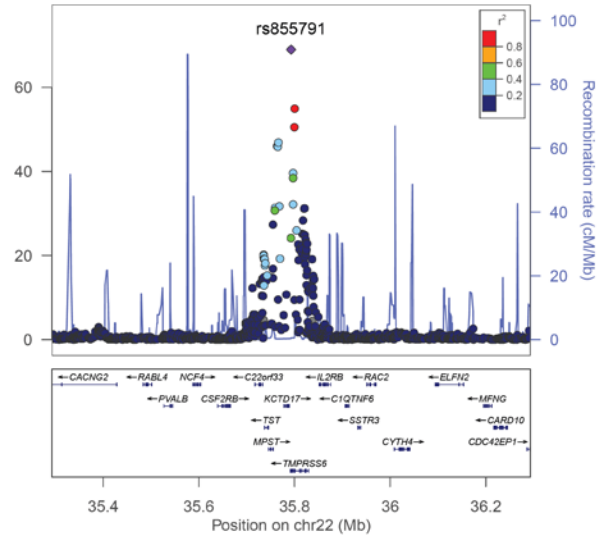

### SF3.75: 22q13 - rs140522 - MCV

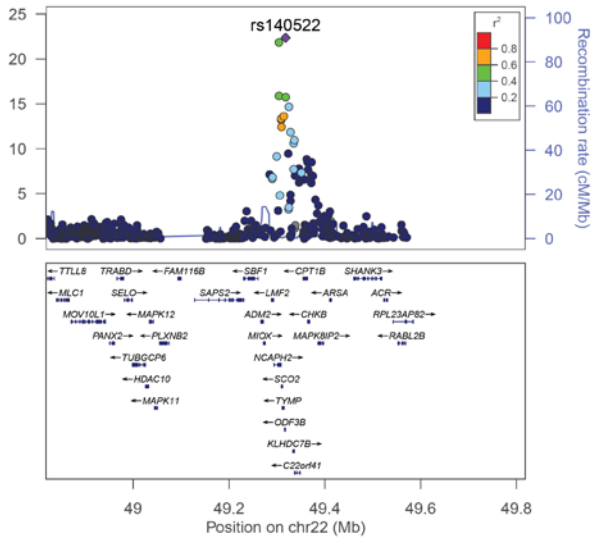

**Supplementary Figure 4.** SF4.1 to 4.3: Regional plots for the three genetic loci associated with red blood cell phenotypes in an East Asian GWAS. Results are shown for Europeans in the current study. The lead SNP identified in the East Asian GWAS is indicated. Pairwise LD with lead SNP is shown using HapMap2 CEU data.

### SF4.1: rs6684514 - MCHC

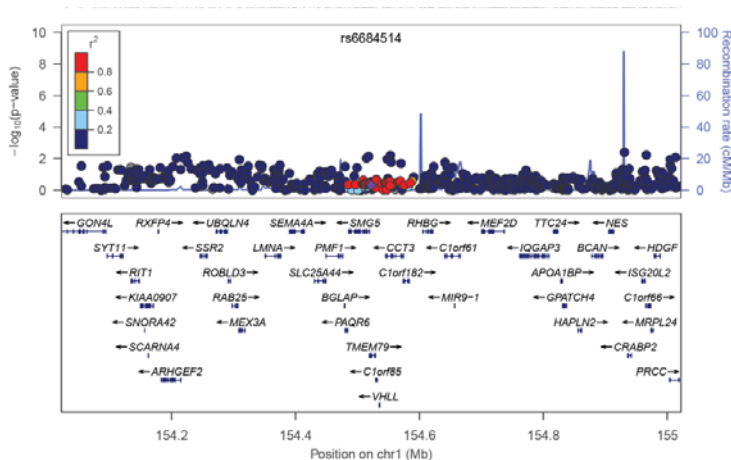

### SF4.2: rs12127588 - MCH

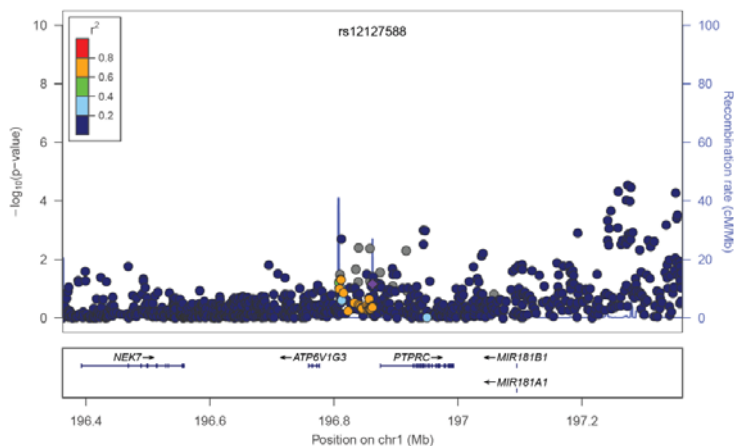

### SF4.3: rs7843479 - MCV

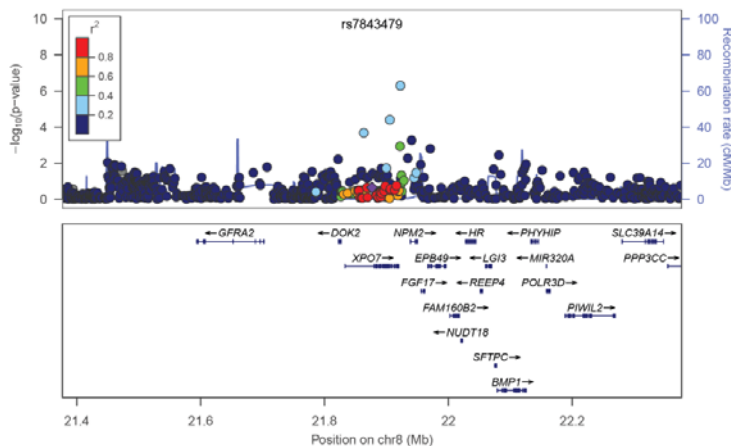

**Supplementary Figure 5.** Associations of the sentinel SNPs from the 75 genetic loci identified with red blood cell phenotypes. Associations are presented as effect size per copy of variant for pairs of phenotypes: 3a - HB and RBC, 3b - HB and MCV, 3c - RBC and MCH, 3d - RBC and MCV. In each plot, SNP symbols are coloured to indicate whether they are associated with phenotype at  $P < 1 \times 10^{-8}$ .

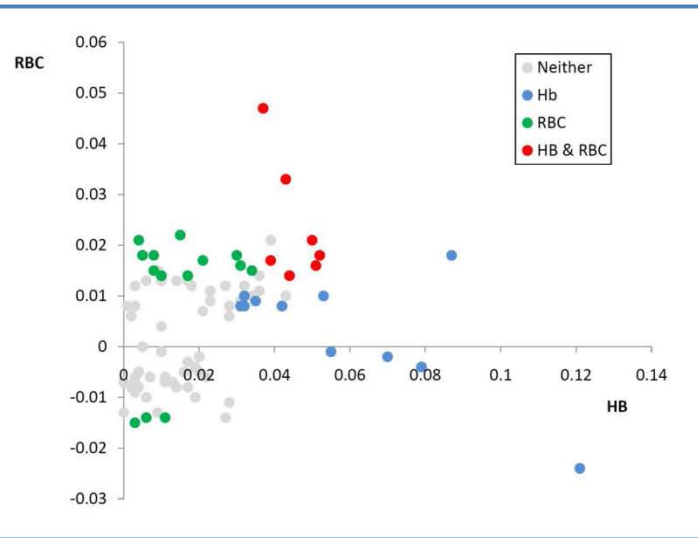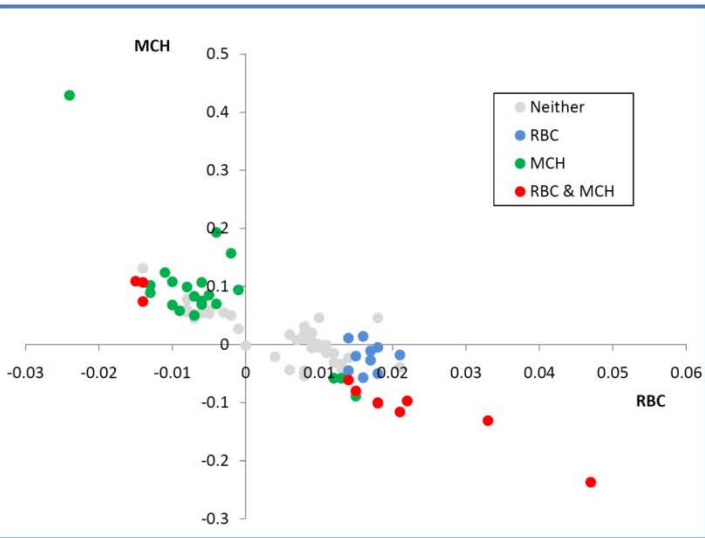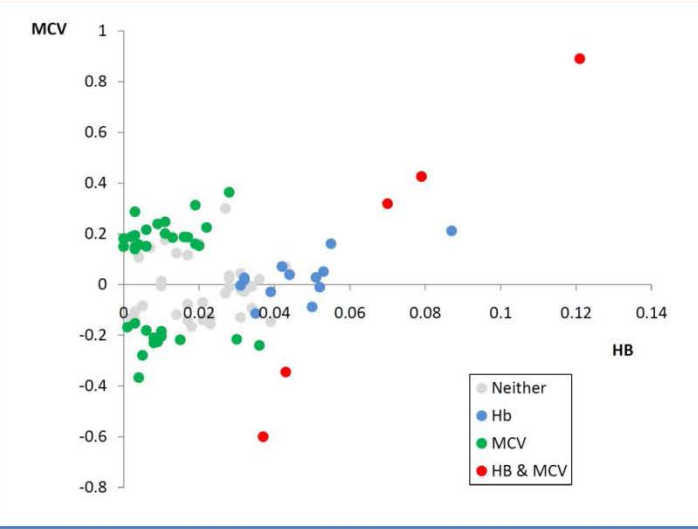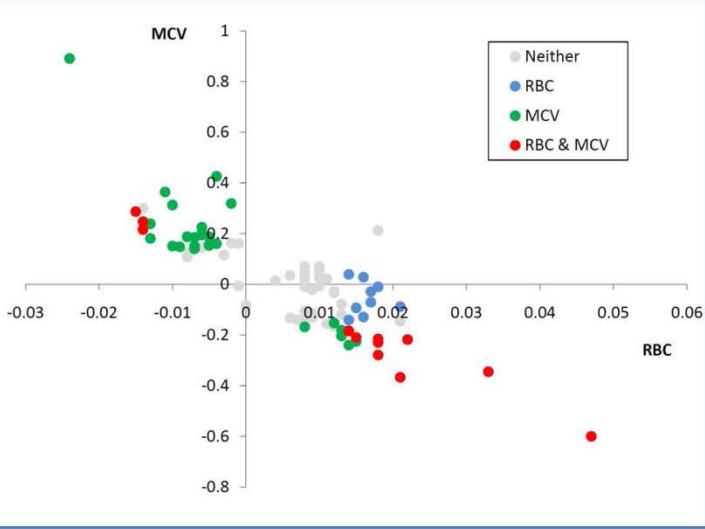





**Supplementary Figure 7.** Distribution for the distance between the HapMap2 SNPs used for the discovery GWAS, and all 1000 Genomes SNPs in high LD ( $r^2 > 0.8$ ) in a 4MB window. Results confirm that the great majority (>99.9%) of SNPs in high LD are located within 1Mb of the discovery SNPs, supporting use of a 1Mb distance to define a genetic region.

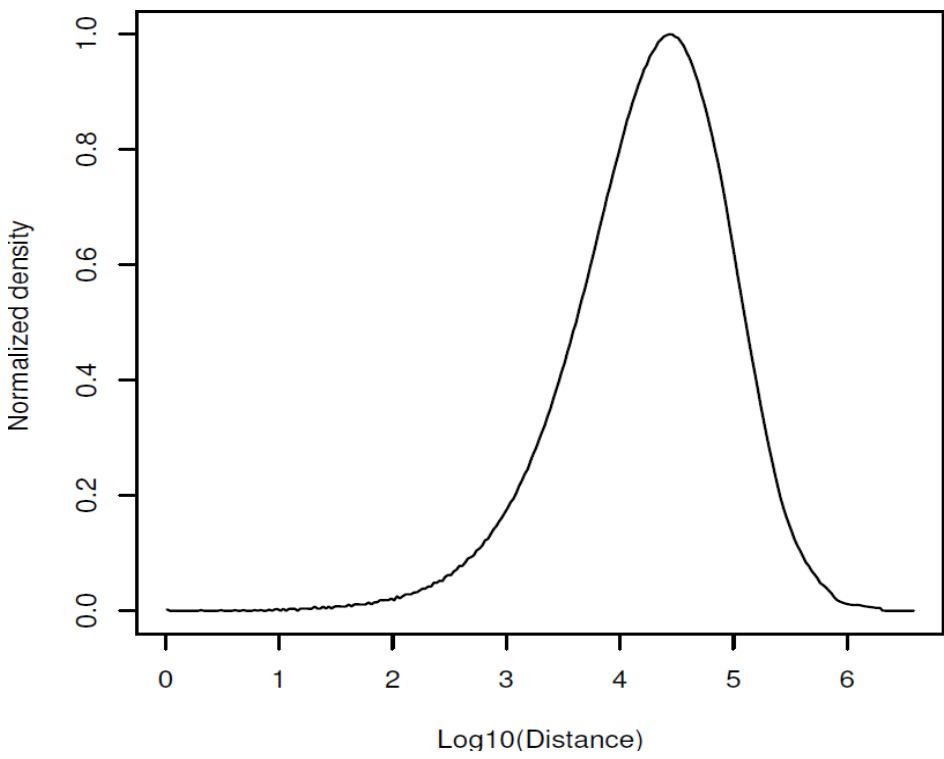

**Supplementary Figure 8.** Permutation testing to simulate expectations under the null hypothesis in the *Drosophila* studies, using a global RNAi screen of blood cell phenotypes. We took a random sample of 121 human genes, identified the *Drosophila* orthologs and counted the number with a blood cell phenotype. This was repeated 1,000,000 times. The simulation was repeated across the range of calling thresholds; for each threshold the number of red blood cell GWAS candidate genes observed to have haematologic phenotype in the *Drosophila* global screen is noted.

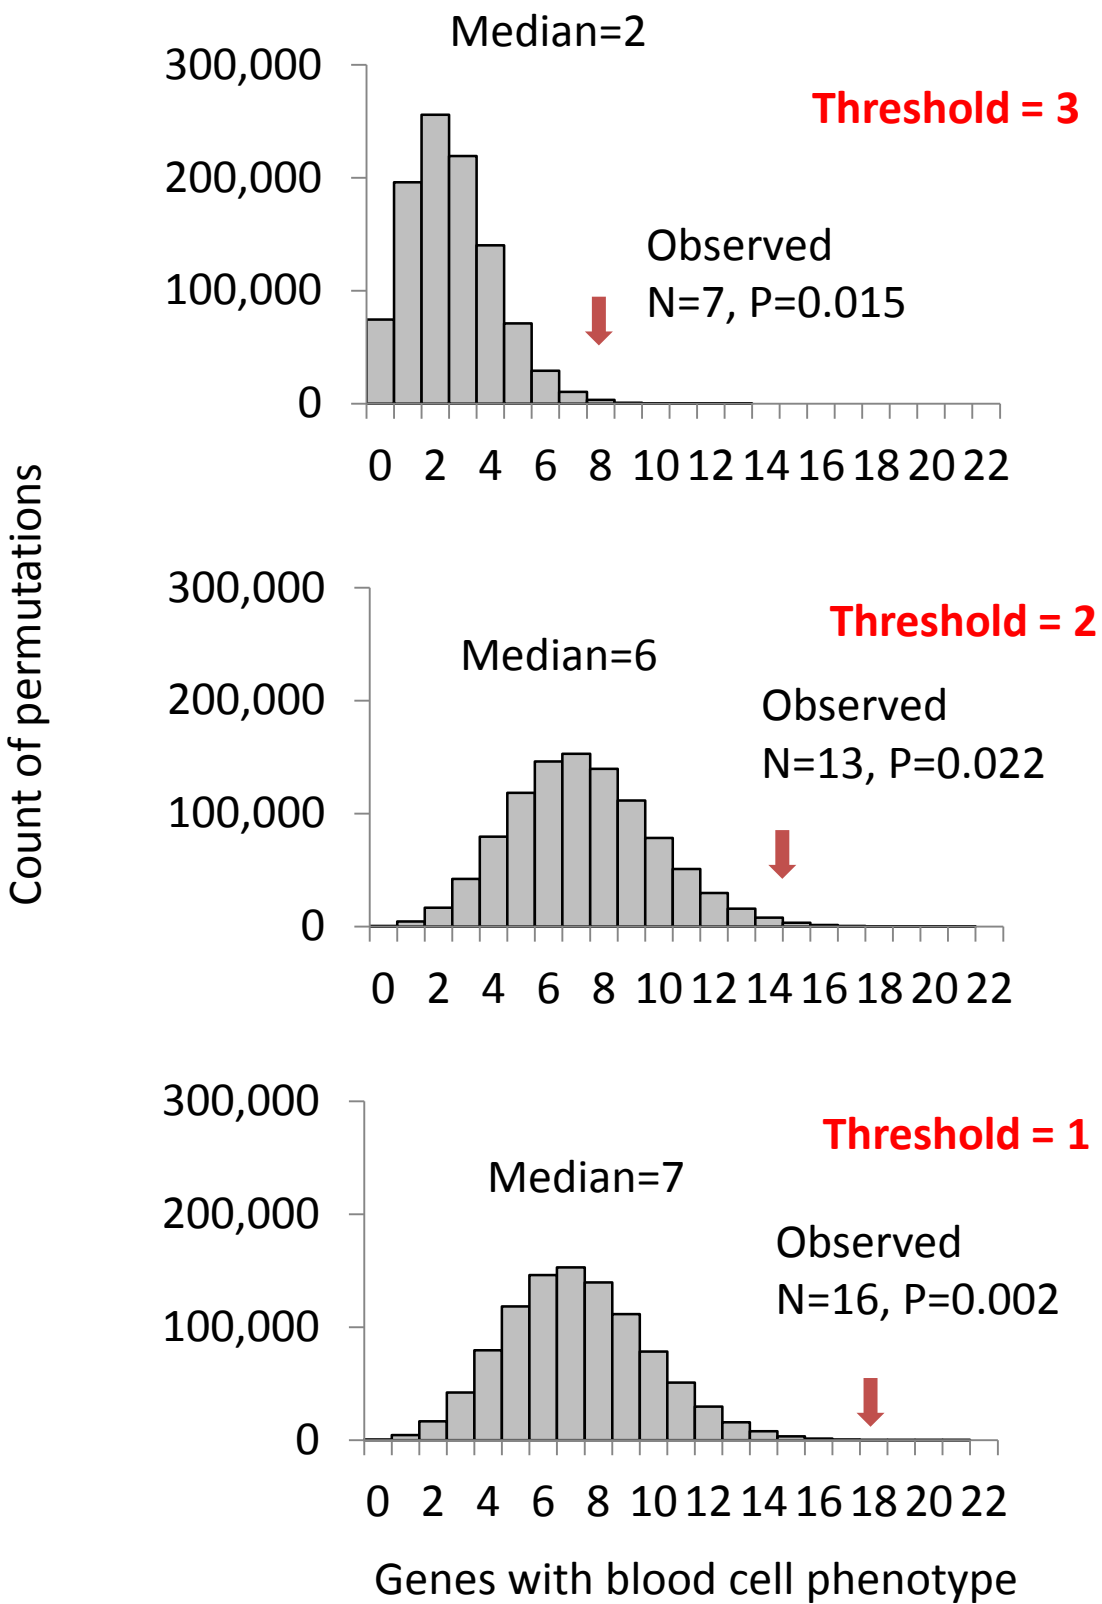

Supplement: NIHMS447872-supplement-Supplement.pdf [file NIHMS447872-supplement-Supplement.pdf]
